# Supplementary material
Source: publisher figshare collection journal article supplement (https://springernature.figshare.com/ndownloader/files/11146112)
Supplement: Supplementary file 1 [file 11146112]

## Sheet: RGB
Exp	Site	Hole	Core	Type	Sect	A/W	Offset (cm)	Depth CSF-A (m)	CCSF-D (m)	CCSF-A (m)	CCSF-D_Patched_rev20150519 (m)	R	G	B	Calculated L*	Calculated a*	Calculated b*	Instrument	Instrument group	Proceedings label	Comments	Splice Interval	Patch
346	U1426	C	1	H	1	A	0	0	0		0	22.8	21.7	19.5	23.6573	0.138369	3.87903	-	XXXX	U1426C-1H-1A, 0.0cm	sub_sample_width 1.5 cm, median_filter_rank 0, data_decimate 100	1
346	U1426	C	1	H	1	A	0.5	0.005	0.005		0.005	27.9	27.1	25.6	27.665	0.153609	2.77472	-	XXXX	U1426C-1H-1A, 0.5cm		1
346	U1426	C	1	H	1	A	1	0.01	0.01		0.01	30.6	29.9	28.7	29.573	0.179728	2.37833	-	XXXX	U1426C-1H-1A, 1.0cm		1
346	U1426	C	1	H	1	A	1.5	0.015	0.015		0.015	39.8	39.3	39	35.3444	0.303069	1.42432	-	XXXX	U1426C-1H-1A, 1.5cm		1
346	U1426	C	1	H	1	A	2	0.02	0.02		0.02	41.6	40.5	39.3	36.0587	0.377265	2.23326	-	XXXX	U1426C-1H-1A, 2.0cm		1
346	U1426	C	1	H	1	A	2.5	0.025	0.025		0.025	31	28.6	25.6	28.8701	0.729323	4.56371	-	XXXX	U1426C-1H-1A, 2.5cm		1
346	U1426	C	1	H	1	A	3	0.03	0.03		0.03	20.7	18.9	16.4	21.465	0.621116	4.69	-	XXXX	U1426C-1H-1A, 3.0cm		1
346	U1426	C	1	H	1	A	3.5	0.035	0.035		0.035	15.5	14.1	11.9	16.9622	0.475441	4.7516	-	XXXX	U1426C-1H-1A, 3.5cm		1
346	U1426	C	1	H	1	A	4	0.04	0.04		0.04	15.1	13.8	11.8	16.6486	0.472314	4.45659	-	XXXX	U1426C-1H-1A, 4.0cm		1
346	U1426	C	1	H	1	A	4.5	0.045	0.045		0.045	19.3	17.8	16.1	20.4978	0.706178	3.68433	-	XXXX	U1426C-1H-1A, 4.5cm		1
346	U1426	C	1	H	1	A	5	0.05	0.05		0.05	26.9	25	23.6	26.3414	0.976737	3.02622	-	XXXX	U1426C-1H-1A, 5.0cm		1
346	U1426	C	1	H	1	A	5.5	0.055	0.055		0.055	29.4	26.8	23.2	27.6336	0.700638	5.36877	-	XXXX	U1426C-1H-1A, 5.5cm		1
346	U1426	C	1	H	1	A	6	0.06	0.06		0.06	32.1	29.2	25	29.2942	0.676394	5.82464	-	XXXX	U1426C-1H-1A, 6.0cm		1
346	U1426	C	1	H	1	A	6.5	0.065	0.065		0.065	33.5	30.5	26.5	30.1754	0.782023	5.53192	-	XXXX	U1426C-1H-1A, 6.5cm		1
346	U1426	C	1	H	1	A	7	0.07	0.07		0.07	33.6	30.3	25.3	30.0452	0.677713	6.59972	-	XXXX	U1426C-1H-1A, 7.0cm		1
346	U1426	C	1	H	1	A	7.5	0.075	0.075		0.075	34.7	31.2	26.2	30.6576	0.790955	6.54822	-	XXXX	U1426C-1H-1A, 7.5cm		1
346	U1426	C	1	H	1	A	8	0.08	0.08		0.08	33.7	30.2	24.8	29.9918	0.689116	7.05484	-	XXXX	U1426C-1H-1A, 8.0cm		1
346	U1426	C	1	H	1	A	8.5	0.085	0.085		0.085	34.2	30.9	25.8	30.4312	0.639185	6.63324	-	XXXX	U1426C-1H-1A, 8.5cm		1
346	U1426	C	1	H	1	A	9	0.09	0.09		0.09	35.3	31.9	27	31.0949	0.746169	6.35818	-	XXXX	U1426C-1H-1A, 9.0cm		1
346	U1426	C	1	H	1	A	9.5	0.095	0.095		0.095	34.5	31.1	26.2	30.5831	0.75875	6.43906	-	XXXX	U1426C-1H-1A, 9.5cm		1
346	U1426	C	1	H	1	A	10	0.1	0.1		0.1	34.5	31.1	25.7	30.562	0.611578	6.92784	-	XXXX	U1426C-1H-1A, 10.0cm		1
346	U1426	C	1	H	1	A	10.5	0.105	0.105		0.105	34.5	31.1	26	30.5746	0.699826	6.63405	-	XXXX	U1426C-1H-1A, 10.5cm		1
346	U1426	C	1	H	1	A	11	0.11	0.11		0.11	35.4	32.1	27.3	31.2118	0.710002	6.22129	-	XXXX	U1426C-1H-1A, 11.0cm		1
346	U1426	C	1	H	1	A	11.5	0.115	0.115		0.115	35.1	32	28	31.154	0.821281	5.42897	-	XXXX	U1426C-1H-1A, 11.5cm		1
346	U1426	C	1	H	1	A	12	0.12	0.12		0.12	34.9	31.8	27.8	31.0269	0.824445	5.44517	-	XXXX	U1426C-1H-1A, 12.0cm		1
346	U1426	C	1	H	1	A	12.5	0.125	0.125		0.125	35.4	32.2	28.1	31.2905	0.850717	5.5286	-	XXXX	U1426C-1H-1A, 12.5cm		1
346	U1426	C	1	H	1	A	13	0.13	0.13		0.13	35.9	32.6	28.2	31.5437	0.818639	5.79804	-	XXXX	U1426C-1H-1A, 13.0cm		1
346	U1426	C	1	H	1	A	13.5	0.135	0.135		0.135	34.1	30.8	26.3	30.392	0.818668	6.05749	-	XXXX	U1426C-1H-1A, 13.5cm		1
346	U1426	C	1	H	1	A	14	0.14	0.14		0.14	34.4	31.2	26.8	30.6402	0.778465	5.90079	-	XXXX	U1426C-1H-1A, 14.0cm		1
346	U1426	C	1	H	1	A	14.5	0.145	0.145		0.145	34.8	31.8	27.9	31.0171	0.791653	5.32876	-	XXXX	U1426C-1H-1A, 14.5cm		1
346	U1426	C	1	H	1	A	15	0.15	0.15		0.15	33.6	31	27.6	30.4685	0.701345	4.82693	-	XXXX	U1426C-1H-1A, 15.0cm		1
346	U1426	C	1	H	1	A	15.5	0.155	0.155		0.155	34.1	31.2	27.4	30.6231	0.767766	5.25935	-	XXXX	U1426C-1H-1A, 15.5cm		1
346	U1426	C	1	H	1	A	16	0.16	0.16		0.16	33.4	30.2	25.6	29.9824	0.734636	6.19201	-	XXXX	U1426C-1H-1A, 16.0cm		1
346	U1426	C	1	H	1	A	16.5	0.165	0.165		0.165	31	28.5	25.4	28.8129	0.765531	4.69366	-	XXXX	U1426C-1H-1A, 16.5cm		1
346	U1426	C	1	H	1	A	17	0.17	0.17		0.17	31	28.4	25.5	28.7692	0.896518	4.52547	-	XXXX	U1426C-1H-1A, 17.0cm		1
346	U1426	C	1	H	1	A	17.5	0.175	0.175		0.175	33	30	26.4	29.8656	0.911542	5.1851	-	XXXX	U1426C-1H-1A, 17.5cm		1
346	U1426	C	1	H	1	A	18	0.18	0.18		0.18	32.8	29.8	25.7	29.7119	0.762925	5.69197	-	XXXX	U1426C-1H-1A, 18.0cm		1
346	U1426	C	1	H	1	A	18.5	0.185	0.185		0.185	33.5	30.4	26.5	30.129	0.877673	5.46606	-	XXXX	U1426C-1H-1A, 18.5cm		1
346	U1426	C	1	H	1	A	19	0.19	0.19		0.19	33.8	30.8	27.1	30.3834	0.867276	5.21778	-	XXXX	U1426C-1H-1A, 19.0cm		1
346	U1426	C	1	H	1	A	19.5	0.195	0.195		0.195	34.6	31.6	28.2	30.9109	0.943031	4.87315	-	XXXX	U1426C-1H-1A, 19.5cm		1
346	U1426	C	1	H	1	A	20	0.2	0.2		0.2	33.9	31	27.6	30.5114	0.89074	4.89389	-	XXXX	U1426C-1H-1A, 20.0cm		1
346	U1426	C	1	H	1	A	20.5	0.205	0.205		0.205	34	31.2	28	30.6347	0.884513	4.66827	-	XXXX	U1426C-1H-1A, 20.5cm		1
346	U1426	C	1	H	1	A	21	0.21	0.21		0.21	33.5	30.7	27.6	30.3159	0.923156	4.60731	-	XXXX	U1426C-1H-1A, 21.0cm		1
346	U1426	C	1	H	1	A	21.5	0.215	0.215		0.215	33.7	30.9	27.7	30.4411	0.889522	4.6887	-	XXXX	U1426C-1H-1A, 21.5cm		1
346	U1426	C	1	H	1	A	22	0.22	0.22		0.22	33.5	30.7	27.5	30.3115	0.892905	4.70248	-	XXXX	U1426C-1H-1A, 22.0cm		1
346	U1426	C	1	H	1	A	22.5	0.225	0.225		0.225	33.4	30.6	27.2	30.2378	0.834064	4.90064	-	XXXX	U1426C-1H-1A, 22.5cm		1
346	U1426	C	1	H	1	A	23	0.23	0.23		0.23	33.3	30.5	27	30.1683	0.805389	5.00406	-	XXXX	U1426C-1H-1A, 23.0cm		1
346	U1426	C	1	H	1	A	23.5	0.235	0.235		0.235	33.6	30.6	26.9	30.2535	0.870687	5.23371	-	XXXX	U1426C-1H-1A, 23.5cm		1
346	U1426	C	1	H	1	A	24	0.24	0.24		0.24	33.7	30.8	27.3	30.3777	0.864048	5.00392	-	XXXX	U1426C-1H-1A, 24.0cm		1
346	U1426	C	1	H	1	A	24.5	0.245	0.245		0.245	33	30.3	27.3	30.0451	0.896915	4.51612	-	XXXX	U1426C-1H-1A, 24.5cm		1
346	U1426	C	1	H	1	A	25	0.25	0.25		0.25	31.5	28.9	26.1	29.1113	0.918824	4.39248	-	XXXX	U1426C-1H-1A, 25.0cm		1
346	U1426	C	1	H	1	A	25.5	0.255	0.255		0.255	33	30.2	27	29.9853	0.901524	4.73753	-	XXXX	U1426C-1H-1A, 25.5cm		1
346	U1426	C	1	H	1	A	26	0.26	0.26		0.26	33.8	31	27.5	30.4928	0.797607	4.96667	-	XXXX	U1426C-1H-1A, 26.0cm		1
346	U1426	C	1	H	1	A	26.5	0.265	0.265		0.265	33.5	30.6	27.1	30.2478	0.867407	5.019	-	XXXX	U1426C-1H-1A, 26.5cm		1
346	U1426	C	1	H	1	A	27	0.27	0.27		0.27	33.5	30.6	27	30.2435	0.837225	5.11502	-	XXXX	U1426C-1H-1A, 27.0cm		1
346	U1426	C	1	H	1	A	27.5	0.275	0.275		0.275	33.2	30.5	27.3	30.1669	0.832702	4.69386	-	XXXX	U1426C-1H-1A, 27.5cm		1
346	U1426	C	1	H	1	A	28	0.28	0.28		0.28	33.7	30.9	27.8	30.4455	0.919679	4.5939	-	XXXX	U1426C-1H-1A, 28.0cm		1
346	U1426	C	1	H	1	A	28.5	0.285	0.285		0.285	33.4	30.6	27.3	30.2421	0.864329	4.80495	-	XXXX	U1426C-1H-1A, 28.5cm		1
346	U1426	C	1	H	1	A	29	0.29	0.29		0.29	32.7	30	26.7	29.835	0.810191	4.82574	-	XXXX	U1426C-1H-1A, 29.0cm		1
346	U1426	C	1	H	1	A	29.5	0.295	0.295		0.295	32.7	30	27.1	29.8527	0.932764	4.43999	-	XXXX	U1426C-1H-1A, 29.5cm		1
346	U1426	C	1	H	1	A	30	0.3	0.3		0.3	33.1	30.3	27.4	30.064	0.991149	4.44315	-	XXXX	U1426C-1H-1A, 30.0cm		1
346	U1426	C	1	H	1	A	30.5	0.305	0.305		0.305	32.7	30	26.9	29.8439	0.871444	4.63253	-	XXXX	U1426C-1H-1A, 30.5cm		1
346	U1426	C	1	H	1	A	31	0.31	0.31		0.31	32.3	29.6	25.9	29.5531	0.69356	5.24705	-	XXXX	U1426C-1H-1A, 31.0cm		1
346	U1426	C	1	H	1	A	31.5	0.315	0.315		0.315	31.5	28.8	25.6	29.0409	0.861202	4.8172	-	XXXX	U1426C-1H-1A, 31.5cm		1
346	U1426	C	1	H	1	A	32	0.32	0.32		0.32	30.9	28.3	25.4	28.7013	0.898345	4.53254	-	XXXX	U1426C-1H-1A, 32.0cm		1
346	U1426	C	1	H	1	A	32.5	0.325	0.325		0.325	31.8	29.1	26	29.2467	0.887056	4.69632	-	XXXX	U1426C-1H-1A, 32.5cm		1
346	U1426	C	1	H	1	A	33	0.33	0.33		0.33	31.5	29	25.9	29.15	0.757773	4.6572	-	XXXX	U1426C-1H-1A, 33.0cm		1
346	U1426	C	1	H	1	A	33.5	0.335	0.335		0.335	31.4	28.8	25.8	29.035	0.857985	4.59617	-	XXXX	U1426C-1H-1A, 33.5cm		1
346	U1426	C	1	H	1	A	34	0.34	0.34		0.34	31.1	28.7	26	28.9513	0.822357	4.26075	-	XXXX	U1426C-1H-1A, 34.0cm		1
346	U1426	C	1	H	1	A	34.5	0.345	0.345		0.345	31.7	29.2	26	29.2795	0.723593	4.74101	-	XXXX	U1426C-1H-1A, 34.5cm		1
346	U1426	C	1	H	1	A	35	0.35	0.35		0.35	31.7	29.2	26	29.2795	0.723593	4.74101	-	XXXX	U1426C-1H-1A, 35.0cm		1
346	U1426	C	1	H	1	A	35.5	0.355	0.355		0.355	31.7	29.3	26	29.327	0.62571	4.80876	-	XXXX	U1426C-1H-1A, 35.5cm		1
346	U1426	C	1	H	1	A	36	0.36	0.36		0.36	31.3	28.9	26	29.077	0.756289	4.44421	-	XXXX	U1426C-1H-1A, 36.0cm		1
346	U1426	C	1	H	1	A	36.5	0.365	0.365		0.365	31.3	29	26.4	29.1429	0.783446	4.12078	-	XXXX	U1426C-1H-1A, 36.5cm		1
346	U1426	C	1	H	1	A	37	0.37	0.37		0.37	30.5	28.1	24.9	28.5211	0.673296	4.80038	-	XXXX	U1426C-1H-1A, 37.0cm		1
346	U1426	C	1	H	1	A	37.5	0.375	0.375		0.375	31.2	28.7	25.4	28.9391	0.699627	4.87749	-	XXXX	U1426C-1H-1A, 37.5cm		1
346	U1426	C	1	H	1	A	38	0.38	0.38		0.38	31.1	28.6	25.4	28.876	0.732513	4.78567	-	XXXX	U1426C-1H-1A, 38.0cm		1
346	U1426	C	1	H	1	A	38.5	0.385	0.385		0.385	30.4	28.1	25.2	28.5197	0.701872	4.47593	-	XXXX	U1426C-1H-1A, 38.5cm		1
346	U1426	C	1	H	1	A	39	0.39	0.39		0.39	30.6	28.2	25.5	28.6122	0.830647	4.29331	-	XXXX	U1426C-1H-1A, 39.0cm		1
346	U1426	C	1	H	1	A	39.5	0.395	0.395		0.395	30.7	28.2	25.3	28.6181	0.83367	4.51607	-	XXXX	U1426C-1H-1A, 39.5cm		1
346	U1426	C	1	H	1	A	40	0.4	0.4		0.4	30.4	28	25.1	28.4664	0.770251	4.50663	-	XXXX	U1426C-1H-1A, 40.0cm		1
346	U1426	C	1	H	1	A	40.5	0.405	0.405		0.405	30	27.8	24.9	28.2989	0.638972	4.47339	-	XXXX	U1426C-1H-1A, 40.5cm		1
346	U1426	C	1	H	1	A	41	0.41	0.41		0.41	30.3	28	25.3	28.4605	0.767217	4.28291	-	XXXX	U1426C-1H-1A, 41.0cm		1
346	U1426	C	1	H	1	A	41.5	0.415	0.415		0.415	30.1	27.9	25	28.3676	0.637643	4.46633	-	XXXX	U1426C-1H-1A, 41.5cm		1
346	U1426	C	1	H	1	A	42	0.42	0.42		0.42	29.5	27.4	24.9	28.026	0.706132	4.07343	-	XXXX	U1426C-1H-1A, 42.0cm		1
346	U1426	C	1	H	1	A	42.5	0.425	0.425		0.425	29.3	27.2	24.6	27.8823	0.67649	4.1874	-	XXXX	U1426C-1H-1A, 42.5cm		1
346	U1426	C	1	H	1	A	43	0.43	0.43		0.43	29.2	27.1	24.5	27.8126	0.677905	4.194	-	XXXX	U1426C-1H-1A, 43.0cm		1
346	U1426	C	1	H	1	A	43.5	0.435	0.435		0.435	29.3	27.1	24.6	27.8327	0.778631	4.11657	-	XXXX	U1426C-1H-1A, 43.5cm		1
346	U1426	C	1	H	1	A	44	0.44	0.44		0.44	29.3	27	24	27.755	0.685834	4.65801	-	XXXX	U1426C-1H-1A, 44.0cm		1
346	U1426	C	1	H	1	A	44.5	0.445	0.445		0.445	29.7	27.5	24.3	28.078	0.546298	4.79966	-	XXXX	U1426C-1H-1A, 44.5cm		1
346	U1426	C	1	H	1	A	45	0.45	0.45		0.45	30.6	28.3	25.2	28.647	0.635501	4.66148	-	XXXX	U1426C-1H-1A, 45.0cm		1
346	U1426	C	1	H	1	A	45.5	0.455	0.455		0.455	29.8	27.5	24	28.0795	0.517821	5.13019	-	XXXX	U1426C-1H-1A, 45.5cm		1
346	U1426	C	1	H	1	A	46	0.46	0.46		0.46	30	27.6	24.2	28.1685	0.61648	5.04327	-	XXXX	U1426C-1H-1A, 46.0cm		1
346	U1426	C	1	H	1	A	46.5	0.465	0.465		0.465	30.5	28.1	24.7	28.5119	0.609813	5.0019	-	XXXX	U1426C-1H-1A, 46.5cm		1
346	U1426	C	1	H	1	A	47	0.47	0.47		0.47	31	28.6	25.3	28.8565	0.634811	4.86188	-	XXXX	U1426C-1H-1A, 47.0cm		1
346	U1426	C	1	H	1	A	47.5	0.475	0.475		0.475	30.6	28.2	25.1	28.5939	0.703597	4.69243	-	XXXX	U1426C-1H-1A, 47.5cm		1
346	U1426	C	1	H	1	A	48	0.48	0.48		0.48	30.3	27.9	24.8	28.3887	0.708034	4.71499	-	XXXX	U1426C-1H-1A, 48.0cm		1
346	U1426	C	1	H	1	A	48.5	0.485	0.485		0.485	29.4	27.1	24	27.8201	0.651948	4.75288	-	XXXX	U1426C-1H-1A, 48.5cm		1
346	U1426	C	1	H	1	A	49	0.49	0.49		0.49	30.7	28.2	24.9	28.5999	0.706994	4.91669	-	XXXX	U1426C-1H-1A, 49.0cm		1
346	U1426	C	1	H	1	A	49.5	0.495	0.495		0.495	30.5	28	24.8	28.4678	0.74175	4.83178	-	XXXX	U1426C-1H-1A, 49.5cm		1
346	U1426	C	1	H	1	A	50	0.5	0.5		0.5	29.8	27.5	24	28.0795	0.517821	5.13019	-	XXXX	U1426C-1H-1A, 50.0cm		1
346	U1426	C	1	H	1	A	50.5	0.505	0.505		0.505	30.1	27.7	24.1	28.2283	0.551292	5.239	-	XXXX	U1426C-1H-1A, 50.5cm		1
346	U1426	C	1	H	1	A	51	0.51	0.51		0.51	29.8	27.4	23.7	28.0163	0.522985	5.36867	-	XXXX	U1426C-1H-1A, 51.0cm		1
346	U1426	C	1	H	1	A	51.5	0.515	0.515		0.515	29.9	27.5	23.9	28.0902	0.553781	5.2567	-	XXXX	U1426C-1H-1A, 51.5cm		1
346	U1426	C	1	H	1	A	52	0.52	0.52		0.52	29.9	27.5	24	28.0948	0.5858	5.15409	-	XXXX	U1426C-1H-1A, 52.0cm		1
346	U1426	C	1	H	1	A	52.5	0.525	0.525		0.525	30.1	27.7	24	28.2237	0.519403	5.34135	-	XXXX	U1426C-1H-1A, 52.5cm		1
346	U1426	C	1	H	1	A	53	0.53	0.53		0.53	30.2	27.8	24.3	28.3017	0.581914	5.1283	-	XXXX	U1426C-1H-1A, 53.0cm		1
346	U1426	C	1	H	1	A	53.5	0.535	0.535		0.535	30.2	27.8	24.4	28.3063	0.613789	5.02658	-	XXXX	U1426C-1H-1A, 53.5cm		1
346	U1426	C	1	H	1	A	54	0.54	0.54		0.54	30.2	27.9	24.3	28.3506	0.481362	5.1978	-	XXXX	U1426C-1H-1A, 54.0cm		1
346	U1426	C	1	H	1	A	54.5	0.545	0.545		0.545	30.5	28.1	24.6	28.5074	0.578099	5.10294	-	XXXX	U1426C-1H-1A, 54.5cm		1
346	U1426	C	1	H	1	A	55	0.55	0.55		0.55	30.6	28.2	24.8	28.5802	0.608503	4.99376	-	XXXX	U1426C-1H-1A, 55.0cm		1
346	U1426	C	1	H	1	A	55.5	0.555	0.555		0.555	30.5	28.2	24.9	28.5697	0.573298	4.86957	-	XXXX	U1426C-1H-1A, 55.5cm		1
346	U1426	C	1	H	1	A	56	0.56	0.56		0.56	30	27.9	24.7	28.3386	0.474216	4.74481	-	XXXX	U1426C-1H-1A, 56.0cm		1
346	U1426	C	1	H	1	A	56.5	0.565	0.565		0.565	30.2	28	25	28.4315	0.604344	4.55962	-	XXXX	U1426C-1H-1A, 56.5cm		1
346	U1426	C	1	H	1	A	57	0.57	0.57		0.57	30.1	27.9	24.9	28.363	0.605611	4.56686	-	XXXX	U1426C-1H-1A, 57.0cm		1
346	U1426	C	1	H	1	A	57.5	0.575	0.575		0.575	30.2	27.9	24.6	28.3644	0.576998	4.89331	-	XXXX	U1426C-1H-1A, 57.5cm		1
346	U1426	C	1	H	1	A	58	0.58	0.58		0.58	30.3	28	24.7	28.4329	0.575757	4.88535	-	XXXX	U1426C-1H-1A, 58.0cm		1
346	U1426	C	1	H	1	A	58.5	0.585	0.585		0.585	30	27.7	24.3	28.2222	0.547494	5.0111	-	XXXX	U1426C-1H-1A, 58.5cm		1
346	U1426	C	1	H	1	A	59	0.59	0.59		0.59	29.7	27.5	24.2	28.0734	0.514101	4.90168	-	XXXX	U1426C-1H-1A, 59.0cm		1
346	U1426	C	1	H	1	A	59.5	0.595	0.595		0.595	29	26.8	23.3	27.576	0.457078	5.16748	-	XXXX	U1426C-1H-1A, 59.5cm		1
346	U1426	C	1	H	1	A	60	0.6	0.6		0.6	29.1	26.9	23.6	27.6555	0.521027	4.95114	-	XXXX	U1426C-1H-1A, 60.0cm		1
346	U1426	C	1	H	1	A	60.5	0.605	0.605		0.605	29.4	27.2	24.1	27.8744	0.582284	4.72098	-	XXXX	U1426C-1H-1A, 60.5cm		1
346	U1426	C	1	H	1	A	61	0.61	0.61		0.61	29.2	27	24.1	27.7442	0.649898	4.53129	-	XXXX	U1426C-1H-1A, 61.0cm		1
346	U1426	C	1	H	1	A	61.5	0.615	0.615		0.615	29.3	27.1	24.1	27.8093	0.616019	4.62624	-	XXXX	U1426C-1H-1A, 61.5cm		1
346	U1426	C	1	H	1	A	62	0.62	0.62		0.62	29.2	27.1	24.2	27.7986	0.580156	4.49981	-	XXXX	U1426C-1H-1A, 62.0cm		1
346	U1426	C	1	H	1	A	62.5	0.625	0.625		0.625	29	26.8	24.1	27.6135	0.718088	4.34071	-	XXXX	U1426C-1H-1A, 62.5cm		1
346	U1426	C	1	H	1	A	63	0.63	0.63		0.63	29.2	27	24.3	27.7535	0.715039	4.32676	-	XXXX	U1426C-1H-1A, 63.0cm		1
346	U1426	C	1	H	1	A	63.5	0.635	0.635		0.635	29	26.9	24.2	27.6681	0.648042	4.30951	-	XXXX	U1426C-1H-1A, 63.5cm		1
346	U1426	C	1	H	1	A	64	0.64	0.64		0.64	28.9	26.8	24	27.5932	0.616666	4.41908	-	XXXX	U1426C-1H-1A, 64.0cm		1
346	U1426	C	1	H	1	A	64.5	0.645	0.645		0.645	29.1	26.9	24.4	27.693	0.781894	4.12953	-	XXXX	U1426C-1H-1A, 64.5cm		1
346	U1426	C	1	H	1	A	65	0.65	0.65		0.65	28.9	26.8	24.3	27.6074	0.715001	4.1118	-	XXXX	U1426C-1H-1A, 65.0cm		1
346	U1426	C	1	H	1	A	65.5	0.655	0.655		0.655	28.9	26.8	24.2	27.6027	0.682203	4.21402	-	XXXX	U1426C-1H-1A, 65.5cm		1
346	U1426	C	1	H	1	A	66	0.66	0.66		0.66	28.9	26.7	24	27.5432	0.719626	4.34774	-	XXXX	U1426C-1H-1A, 66.0cm		1
346	U1426	C	1	H	1	A	66.5	0.665	0.665		0.665	28.8	26.7	23.9	27.5229	0.617998	4.42629	-	XXXX	U1426C-1H-1A, 66.5cm		1
346	U1426	C	1	H	1	A	67	0.67	0.67		0.67	28.8	26.7	24	27.5277	0.650816	4.32343	-	XXXX	U1426C-1H-1A, 67.0cm		1
346	U1426	C	1	H	1	A	67.5	0.675	0.675		0.675	28.7	26.6	24.1	27.4667	0.718029	4.12487	-	XXXX	U1426C-1H-1A, 67.5cm		1
346	U1426	C	1	H	1	A	68	0.68	0.68		0.68	29	26.9	24.4	27.6775	0.713501	4.10531	-	XXXX	U1426C-1H-1A, 68.0cm		1
346	U1426	C	1	H	1	A	68.5	0.685	0.685		0.685	29.1	27	24.5	27.7475	0.712009	4.09887	-	XXXX	U1426C-1H-1A, 68.5cm		1
346	U1426	C	1	H	1	A	69	0.69	0.69		0.69	28.9	26.8	24.3	27.6074	0.715001	4.1118	-	XXXX	U1426C-1H-1A, 69.0cm		1
346	U1426	C	1	H	1	A	69.5	0.695	0.695		0.695	28.7	26.7	24.3	27.5263	0.680686	3.99175	-	XXXX	U1426C-1H-1A, 69.5cm		1
346	U1426	C	1	H	1	A	70	0.7	0.7		0.7	28.4	26.5	24.1	27.3697	0.61448	3.97991	-	XXXX	U1426C-1H-1A, 70.0cm		1
346	U1426	C	1	H	1	A	70.5	0.705	0.705		0.705	28.2	26.2	23.9	27.1774	0.721191	3.92023	-	XXXX	U1426C-1H-1A, 70.5cm		1
346	U1426	C	1	H	1	A	71	0.71	0.71		0.71	26.7	24.9	22.7	26.2126	0.633074	3.84701	-	XXXX	U1426C-1H-1A, 71.0cm		1
346	U1426	C	1	H	1	A	71.5	0.715	0.715		0.715	27.4	25.5	23.3	26.6649	0.695394	3.8348	-	XXXX	U1426C-1H-1A, 71.5cm		1
346	U1426	C	1	H	1	A	72	0.72	0.72		0.72	26.3	24.5	22.2	25.9134	0.604229	3.9798	-	XXXX	U1426C-1H-1A, 72.0cm		1
346	U1426	C	1	H	1	A	72.5	0.725	0.725		0.725	27.4	25.5	23.3	26.6649	0.695394	3.8348	-	XXXX	U1426C-1H-1A, 72.5cm		1
346	U1426	C	1	H	1	A	73	0.73	0.73		0.73	28.1	26.2	23.8	27.1569	0.618399	3.99888	-	XXXX	U1426C-1H-1A, 73.0cm		1
346	U1426	C	1	H	1	A	73.5	0.735	0.735		0.735	29.2	27.1	24.5	27.8126	0.677905	4.194	-	XXXX	U1426C-1H-1A, 73.5cm		1
346	U1426	C	1	H	1	A	74	0.74	0.74		0.74	29.3	27.2	24.5	27.8776	0.643945	4.28891	-	XXXX	U1426C-1H-1A, 74.0cm		1
346	U1426	C	1	H	1	A	74.5	0.745	0.745		0.745	29.4	27.2	24.6	27.8977	0.744511	4.21145	-	XXXX	U1426C-1H-1A, 74.5cm		1
346	U1426	C	1	H	1	A	75	0.75	0.75		0.75	29.4	27.2	24.5	27.893	0.712027	4.31296	-	XXXX	U1426C-1H-1A, 75.0cm		1
346	U1426	C	1	H	1	A	75.5	0.755	0.755		0.755	29.2	27	24.5	27.7629	0.780257	4.12303	-	XXXX	U1426C-1H-1A, 75.5cm		1
346	U1426	C	1	H	1	A	76	0.76	0.76		0.76	29.7	27.5	24.9	28.1059	0.739888	4.19171	-	XXXX	U1426C-1H-1A, 76.0cm		1
346	U1426	C	1	H	1	A	76.5	0.765	0.765		0.765	29.7	27.5	24.8	28.1012	0.707576	4.29255	-	XXXX	U1426C-1H-1A, 76.5cm		1
346	U1426	C	1	H	1	A	77	0.77	0.77		0.77	29.9	27.7	25.1	28.2439	0.736852	4.17873	-	XXXX	U1426C-1H-1A, 77.0cm		1
346	U1426	C	1	H	1	A	77.5	0.775	0.775		0.775	30.4	28.1	25.4	28.5289	0.765656	4.27631	-	XXXX	U1426C-1H-1A, 77.5cm		1
346	U1426	C	1	H	1	A	78	0.78	0.78		0.78	30.4	28.1	25.5	28.5335	0.797576	4.17678	-	XXXX	U1426C-1H-1A, 78.0cm		1
346	U1426	C	1	H	1	A	78.5	0.785	0.785		0.785	30.3	28.1	25.6	28.523	0.76288	4.05383	-	XXXX	U1426C-1H-1A, 78.5cm		1
346	U1426	C	1	H	1	A	79	0.79	0.79		0.79	29.7	27.6	25	28.1597	0.670912	4.16135	-	XXXX	U1426C-1H-1A, 79.0cm		1
346	U1426	C	1	H	1	A	79.5	0.795	0.795		0.795	29.9	27.8	25.4	28.3068	0.732631	3.94874	-	XXXX	U1426C-1H-1A, 79.5cm		1
346	U1426	C	1	H	1	A	80	0.8	0.8		0.8	30.7	28.5	26	28.7953	0.75683	4.02965	-	XXXX	U1426C-1H-1A, 80.0cm		1
346	U1426	C	1	H	1	A	80.5	0.805	0.805		0.805	30.8	28.5	25.9	28.8057	0.791207	4.15157	-	XXXX	U1426C-1H-1A, 80.5cm		1
346	U1426	C	1	H	1	A	81	0.81	0.81		0.81	30.7	28.4	25.7	28.7332	0.76103	4.25671	-	XXXX	U1426C-1H-1A, 81.0cm		1
346	U1426	C	1	H	1	A	81.5	0.815	0.815		0.815	30.8	28.5	25.8	28.8011	0.759505	4.25025	-	XXXX	U1426C-1H-1A, 81.5cm		1
346	U1426	C	1	H	1	A	82	0.82	0.82		0.82	31	28.6	25.9	28.8838	0.823997	4.2672	-	XXXX	U1426C-1H-1A, 82.0cm		1
346	U1426	C	1	H	1	A	82.5	0.825	0.825		0.825	31.3	28.9	25.9	29.0725	0.724906	4.5426	-	XXXX	U1426C-1H-1A, 82.5cm		1
346	U1426	C	1	H	1	A	83	0.83	0.83		0.83	30.9	28.5	25.6	28.807	0.762405	4.47159	-	XXXX	U1426C-1H-1A, 83.0cm		1
346	U1426	C	1	H	1	A	83.5	0.835	0.835		0.835	30.8	28.4	25.6	28.7437	0.795621	4.37926	-	XXXX	U1426C-1H-1A, 83.5cm		1
346	U1426	C	1	H	1	A	84	0.84	0.84		0.84	31.1	28.7	25.9	28.9468	0.790835	4.3592	-	XXXX	U1426C-1H-1A, 84.0cm		1
346	U1426	C	1	H	1	A	84.5	0.845	0.845		0.845	31	28.6	26	28.8883	0.855589	4.16872	-	XXXX	U1426C-1H-1A, 84.5cm		1
346	U1426	C	1	H	1	A	85	0.85	0.85		0.85	31.1	28.8	25.9	28.9948	0.69195	4.42772	-	XXXX	U1426C-1H-1A, 85.0cm		1
346	U1426	C	1	H	1	A	85.5	0.855	0.855		0.855	31.2	28.7	25.6	28.9481	0.762401	4.67896	-	XXXX	U1426C-1H-1A, 85.5cm		1
346	U1426	C	1	H	1	A	86	0.86	0.86		0.86	31.1	28.7	26	28.9513	0.822357	4.26075	-	XXXX	U1426C-1H-1A, 86.0cm		1
346	U1426	C	1	H	1	A	86.5	0.865	0.865		0.865	30.8	28.4	25.4	28.7346	0.73231	4.57796	-	XXXX	U1426C-1H-1A, 86.5cm		1
346	U1426	C	1	H	1	A	87	0.87	0.87		0.87	31.7	29.3	26.3	29.3405	0.719134	4.51497	-	XXXX	U1426C-1H-1A, 87.0cm		1
346	U1426	C	1	H	1	A	87.5	0.875	0.875		0.875	32.2	29.8	26.8	29.6726	0.712097	4.48121	-	XXXX	U1426C-1H-1A, 87.5cm		1
346	U1426	C	1	H	1	A	88	0.88	0.88		0.88	31.9	29.4	26.5	29.4264	0.81385	4.43378	-	XXXX	U1426C-1H-1A, 88.0cm		1
346	U1426	C	1	H	1	A	88.5	0.885	0.885		0.885	31.9	29.4	26.5	29.4264	0.81385	4.43378	-	XXXX	U1426C-1H-1A, 88.5cm		1
346	U1426	C	1	H	1	A	89	0.89	0.89		0.89	31.8	29.4	26.4	29.4072	0.717711	4.50815	-	XXXX	U1426C-1H-1A, 89.0cm		1
346	U1426	C	1	H	1	A	89.5	0.895	0.895		0.895	31.9	29.5	26.6	29.4782	0.74737	4.40419	-	XXXX	U1426C-1H-1A, 89.5cm		1
346	U1426	C	1	H	1	A	90	0.9	0.9		0.9	31.9	29.5	26.7	29.4827	0.77846	4.30719	-	XXXX	U1426C-1H-1A, 90.0cm		1
346	U1426	C	1	H	1	A	90.5	0.905	0.905		0.905	31.8	29.4	26.8	29.4251	0.842311	4.11971	-	XXXX	U1426C-1H-1A, 90.5cm		1
346	U1426	C	1	H	1	A	91	0.91	0.91		0.91	31.6	29.2	26.6	29.2917	0.845576	4.13178	-	XXXX	U1426C-1H-1A, 91.0cm		1
346	U1426	C	1	H	1	A	91.5	0.915	0.915		0.915	31.2	28.9	26.4	29.0803	0.816487	4.02919	-	XXXX	U1426C-1H-1A, 91.5cm		1
346	U1426	C	1	H	1	A	92	0.92	0.92		0.92	31.1	28.8	26	28.9993	0.723457	4.3293	-	XXXX	U1426C-1H-1A, 92.0cm		1
346	U1426	C	1	H	1	A	92.5	0.925	0.925		0.925	31.5	29.2	26.4	29.2679	0.717754	4.30335	-	XXXX	U1426C-1H-1A, 92.5cm		1
346	U1426	C	1	H	1	A	93	0.93	0.93		0.93	31.3	29	26.3	29.1384	0.75201	4.21843	-	XXXX	U1426C-1H-1A, 93.0cm		1
346	U1426	C	1	H	1	A	93.5	0.935	0.935		0.935	31.8	29.4	26.6	29.4161	0.779977	4.31358	-	XXXX	U1426C-1H-1A, 93.5cm		1
346	U1426	C	1	H	1	A	94	0.94	0.94		0.94	32.3	29.9	27.1	29.7476	0.772475	4.28197	-	XXXX	U1426C-1H-1A, 94.0cm		1
346	U1426	C	1	H	1	A	94.5	0.945	0.945		0.945	32.2	29.8	27.1	29.686	0.804915	4.19199	-	XXXX	U1426C-1H-1A, 94.5cm		1
346	U1426	C	1	H	1	A	95	0.95	0.95		0.95	32.2	29.8	27.2	29.6905	0.835887	4.09593	-	XXXX	U1426C-1H-1A, 95.0cm		1
346	U1426	C	1	H	1	A	95.5	0.955	0.955		0.955	31.5	29.2	26.7	29.2814	0.811751	4.0116	-	XXXX	U1426C-1H-1A, 95.5cm		1
346	U1426	C	1	H	1	A	96	0.96	0.96		0.96	31.4	29.1	26.7	29.219	0.844739	3.92034	-	XXXX	U1426C-1H-1A, 96.0cm		1
346	U1426	C	1	H	1	A	96.5	0.965	0.965		0.965	31.7	29.5	27.1	29.4713	0.773548	3.875	-	XXXX	U1426C-1H-1A, 96.5cm		1
346	U1426	C	1	H	1	A	97	0.97	0.97		0.97	31.5	29.2	27	29.295	0.905896	3.72142	-	XXXX	U1426C-1H-1A, 97.0cm		1
346	U1426	C	1	H	1	A	97.5	0.975	0.975		0.975	31.6	29.3	26.9	29.3528	0.841502	3.90909	-	XXXX	U1426C-1H-1A, 97.5cm		1
346	U1426	C	1	H	1	A	98	0.98	0.98		0.98	31.6	29.3	27	29.3573	0.872832	3.81256	-	XXXX	U1426C-1H-1A, 98.0cm		1
346	U1426	C	1	H	1	A	98.5	0.985	0.985		0.985	31.3	28.9	26.6	29.1042	0.944945	3.85761	-	XXXX	U1426C-1H-1A, 98.5cm		1
346	U1426	C	1	H	1	A	99	0.99	0.99		0.99	31.1	28.8	26.4	29.0175	0.84966	3.93741	-	XXXX	U1426C-1H-1A, 99.0cm		1
346	U1426	C	1	H	1	A	99.5	0.995	0.995		0.995	31.6	29.4	27.1	29.4092	0.80635	3.78417	-	XXXX	U1426C-1H-1A, 99.5cm		1
346	U1426	C	1	H	1	A	100	1	1		1	31.8	29.6	27.1	29.5332	0.740874	3.96564	-	XXXX	U1426C-1H-1A, 100.0cm		1
346	U1426	C	1	H	1	A	100.5	1.005	1.005		1.005	31.2	28.9	26.6	29.0894	0.87955	3.83437	-	XXXX	U1426C-1H-1A, 100.5cm		1
346	U1426	C	1	H	1	A	101	1.01	1.01		1.01	31.1	28.8	26.5	29.0221	0.881253	3.83989	-	XXXX	U1426C-1H-1A, 101.0cm		1
346	U1426	C	1	H	1	A	101.5	1.015	1.015		1.015	31	28.8	26.4	29.0026	0.784013	3.91413	-	XXXX	U1426C-1H-1A, 101.5cm		1
346	U1426	C	1	H	1	A	102	1.02	1.02		1.02	30.5	28.2	25.8	28.6109	0.859753	3.97236	-	XXXX	U1426C-1H-1A, 102.0cm		1
346	U1426	C	1	H	1	A	102.5	1.025	1.025		1.025	30.7	28.5	26.1	28.7999	0.788623	3.93133	-	XXXX	U1426C-1H-1A, 102.5cm		1
346	U1426	C	1	H	1	A	103	1.03	1.03		1.03	31	28.7	26.2	28.9455	0.819689	4.04107	-	XXXX	U1426C-1H-1A, 103.0cm		1
346	U1426	C	1	H	1	A	103.5	1.035	1.035		1.035	29.9	27.8	25.4	28.3068	0.732631	3.94874	-	XXXX	U1426C-1H-1A, 103.5cm		1
346	U1426	C	1	H	1	A	104	1.04	1.04		1.04	30.1	27.9	25.4	28.3861	0.765957	4.06611	-	XXXX	U1426C-1H-1A, 104.0cm		1
346	U1426	C	1	H	1	A	104.5	1.045	1.045		1.045	30.2	28	25.6	28.4592	0.796482	3.96058	-	XXXX	U1426C-1H-1A, 104.5cm		1
346	U1426	C	1	H	1	A	105	1.05	1.05		1.05	30.4	28.1	25.7	28.5427	0.861468	3.97829	-	XXXX	U1426C-1H-1A, 105.0cm		1
346	U1426	C	1	H	1	A	105.5	1.055	1.055		1.055	30.7	28.5	26.2	28.8044	0.820433	3.83319	-	XXXX	U1426C-1H-1A, 105.5cm		1
346	U1426	C	1	H	1	A	106	1.06	1.06		1.06	31.3	29.1	26.6	29.1997	0.748007	3.99429	-	XXXX	U1426C-1H-1A, 106.0cm		1
346	U1426	C	1	H	1	A	106.5	1.065	1.065		1.065	30.9	28.6	26	28.8734	0.789638	4.14535	-	XXXX	U1426C-1H-1A, 106.5cm		1
346	U1426	C	1	H	1	A	107	1.07	1.07		1.07	30.8	28.4	25.9	28.7574	0.89072	4.08259	-	XXXX	U1426C-1H-1A, 107.0cm		1
346	U1426	C	1	H	1	A	107.5	1.075	1.075		1.075	31	28.7	26.3	28.9501	0.851319	3.94316	-	XXXX	U1426C-1H-1A, 107.5cm		1
346	U1426	C	1	H	1	A	108	1.08	1.08		1.08	31.7	29.4	26.9	29.4149	0.808636	4.00002	-	XXXX	U1426C-1H-1A, 108.0cm		1
346	U1426	C	1	H	1	A	108.5	1.085	1.085		1.085	31.7	29.4	26.9	29.4149	0.808636	4.00002	-	XXXX	U1426C-1H-1A, 108.5cm		1
346	U1426	C	1	H	1	A	109	1.09	1.09		1.09	31	28.7	26.2	28.9455	0.819689	4.04107	-	XXXX	U1426C-1H-1A, 109.0cm		1
346	U1426	C	1	H	1	A	109.5	1.095	1.095		1.095	31.3	29	26.5	29.1475	0.8149	4.0233	-	XXXX	U1426C-1H-1A, 109.5cm		1
346	U1426	C	1	H	1	A	110	1.1	1.1		1.1	31.3	29	26.3	29.1384	0.75201	4.21843	-	XXXX	U1426C-1H-1A, 110.0cm		1
346	U1426	C	1	H	1	A	110.5	1.105	1.105		1.105	31.2	28.8	26.3	29.0279	0.883718	4.0584	-	XXXX	U1426C-1H-1A, 110.5cm		1
346	U1426	C	1	H	1	A	111	1.11	1.11		1.11	31.3	29	26.7	29.1565	0.877857	3.82887	-	XXXX	U1426C-1H-1A, 111.0cm		1
346	U1426	C	1	H	1	A	111.5	1.115	1.115		1.115	31.2	28.9	26.6	29.0894	0.87955	3.83437	-	XXXX	U1426C-1H-1A, 111.5cm		1
346	U1426	C	1	H	1	A	112	1.12	1.12		1.12	30.2	28.1	25.8	28.5171	0.760332	3.83208	-	XXXX	U1426C-1H-1A, 112.0cm		1
346	U1426	C	1	H	1	A	112.5	1.125	1.125		1.125	30.1	28.1	25.8	28.5021	0.693672	3.80848	-	XXXX	U1426C-1H-1A, 112.5cm		1
346	U1426	C	1	H	1	A	113	1.13	1.13		1.13	30	27.9	25.6	28.3802	0.76336	3.84342	-	XXXX	U1426C-1H-1A, 113.0cm		1
346	U1426	C	1	H	1	A	113.5	1.135	1.135		1.135	30.9	28.7	26.5	28.9443	0.848962	3.72455	-	XXXX	U1426C-1H-1A, 113.5cm		1
346	U1426	C	1	H	1	A	114	1.14	1.14		1.14	31	28.8	26.5	29.0072	0.815661	3.8166	-	XXXX	U1426C-1H-1A, 114.0cm		1
346	U1426	C	1	H	1	A	114.5	1.145	1.145		1.145	31	28.8	26.4	29.0026	0.784013	3.91413	-	XXXX	U1426C-1H-1A, 114.5cm		1
346	U1426	C	1	H	1	A	115	1.15	1.15		1.15	31.2	29	26.6	29.1372	0.780982	3.90281	-	XXXX	U1426C-1H-1A, 115.0cm		1
346	U1426	C	1	H	1	A	115.5	1.155	1.155		1.155	31.2	29	26.6	29.1372	0.780982	3.90281	-	XXXX	U1426C-1H-1A, 115.5cm		1
346	U1426	C	1	H	1	A	116	1.16	1.16		1.16	31	28.8	26.4	29.0026	0.784013	3.91413	-	XXXX	U1426C-1H-1A, 116.0cm		1
346	U1426	C	1	H	1	A	116.5	1.165	1.165		1.165	31.2	29	26.5	29.1326	0.749457	4.00011	-	XXXX	U1426C-1H-1A, 116.5cm		1
346	U1426	C	1	H	1	A	117	1.17	1.17		1.17	31	28.8	26.3	28.9981	0.752381	4.01184	-	XXXX	U1426C-1H-1A, 117.0cm		1
346	U1426	C	1	H	1	A	117.5	1.175	1.175		1.175	30.9	28.7	26.3	28.9352	0.785541	3.91983	-	XXXX	U1426C-1H-1A, 117.5cm		1
346	U1426	C	1	H	1	A	118	1.18	1.18		1.18	30.8	28.6	26.2	28.8676	0.787078	3.92556	-	XXXX	U1426C-1H-1A, 118.0cm		1
346	U1426	C	1	H	1	A	118.5	1.185	1.185		1.185	31.4	29.2	26.8	29.2712	0.777984	3.8916	-	XXXX	U1426C-1H-1A, 118.5cm		1
346	U1426	C	1	H	1	A	119	1.19	1.19		1.19	30.7	28.6	26.2	28.8526	0.7211	3.90219	-	XXXX	U1426C-1H-1A, 119.0cm		1
346	U1426	C	1	H	1	A	119.5	1.195	1.195		1.195	31.4	29.2	26.9	29.2757	0.80942	3.79488	-	XXXX	U1426C-1H-1A, 119.5cm		1
346	U1426	C	1	H	1	A	120	1.2	1.2		1.2	31.6	29.4	26.9	29.4002	0.743704	3.97702	-	XXXX	U1426C-1H-1A, 120.0cm		1
346	U1426	C	1	H	1	A	120.5	1.205	1.205		1.205	31	28.8	26.4	29.0026	0.784013	3.91413	-	XXXX	U1426C-1H-1A, 120.5cm		1
346	U1426	C	1	H	1	A	121	1.21	1.21		1.21	31.1	28.9	26.7	29.0791	0.845699	3.71398	-	XXXX	U1426C-1H-1A, 121.0cm		1
346	U1426	C	1	H	1	A	121.5	1.215	1.215		1.215	31.6	29.3	26.9	29.3528	0.841502	3.90909	-	XXXX	U1426C-1H-1A, 121.5cm		1
346	U1426	C	1	H	1	A	122	1.22	1.22		1.22	31.1	28.9	26.6	29.0745	0.814088	3.81113	-	XXXX	U1426C-1H-1A, 122.0cm		1
346	U1426	C	1	H	1	A	122.5	1.225	1.225		1.225	30.3	28.2	25.8	28.5808	0.7268	3.92523	-	XXXX	U1426C-1H-1A, 122.5cm		1
346	U1426	C	1	H	1	A	123	1.23	1.23		1.23	30.4	28.3	25.9	28.649	0.725363	3.91942	-	XXXX	U1426C-1H-1A, 123.0cm		1
346	U1426	C	1	H	1	A	123.5	1.235	1.235		1.235	30.1	28	25.6	28.4441	0.729699	3.93692	-	XXXX	U1426C-1H-1A, 123.5cm		1
346	U1426	C	1	H	1	A	124	1.24	1.24		1.24	30.4	28.2	25.9	28.6005	0.825286	3.85003	-	XXXX	U1426C-1H-1A, 124.0cm		1
346	U1426	C	1	H	1	A	124.5	1.245	1.245		1.245	30.9	28.8	26.7	29.0015	0.813458	3.59879	-	XXXX	U1426C-1H-1A, 124.5cm		1
346	U1426	C	1	H	1	A	125	1.25	1.25		1.25	30.9	28.7	26.2	28.9306	0.753856	4.01774	-	XXXX	U1426C-1H-1A, 125.0cm		1
346	U1426	C	1	H	1	A	125.5	1.255	1.255		1.255	30.8	28.6	26.2	28.8676	0.787078	3.92556	-	XXXX	U1426C-1H-1A, 125.5cm		1
346	U1426	C	1	H	1	A	126	1.26	1.26		1.26	31.1	28.8	26.1	29.0039	0.754982	4.23106	-	XXXX	U1426C-1H-1A, 126.0cm		1
346	U1426	C	1	H	1	A	126.5	1.265	1.265		1.265	31.1	28.8	26.1	29.0039	0.754982	4.23106	-	XXXX	U1426C-1H-1A, 126.5cm		1
346	U1426	C	1	H	1	A	127	1.27	1.27		1.27	30.4	28.2	25.6	28.5867	0.729414	4.14687	-	XXXX	U1426C-1H-1A, 127.0cm		1
346	U1426	C	1	H	1	A	127.5	1.275	1.275		1.275	30.7	28.5	25.8	28.7861	0.693295	4.22683	-	XXXX	U1426C-1H-1A, 127.5cm		1
346	U1426	C	1	H	1	A	128	1.28	1.28		1.28	30.8	28.5	25.9	28.8057	0.791207	4.15157	-	XXXX	U1426C-1H-1A, 128.0cm		1
346	U1426	C	1	H	1	A	128.5	1.285	1.285		1.285	31	28.7	26	28.9364	0.756481	4.23742	-	XXXX	U1426C-1H-1A, 128.5cm		1
346	U1426	C	1	H	1	A	129	1.29	1.29		1.29	31	28.7	25.9	28.9319	0.724903	4.33587	-	XXXX	U1426C-1H-1A, 129.0cm		1
346	U1426	C	1	H	1	A	129.5	1.295	1.295		1.295	31	28.7	26	28.9364	0.756481	4.23742	-	XXXX	U1426C-1H-1A, 129.5cm		1
346	U1426	C	1	H	1	A	130	1.3	1.3		1.3	30.9	28.7	25.9	28.9169	0.658903	4.31255	-	XXXX	U1426C-1H-1A, 130.0cm		1
346	U1426	C	1	H	1	A	130.5	1.305	1.305		1.305	30.4	28.2	25.5	28.5821	0.697493	4.24618	-	XXXX	U1426C-1H-1A, 130.5cm		1
346	U1426	C	1	H	1	A	131	1.31	1.31		1.31	30.1	27.9	25.4	28.3861	0.765957	4.06611	-	XXXX	U1426C-1H-1A, 131.0cm		1
346	U1426	C	1	H	1	A	131.5	1.315	1.315		1.315	30.5	28.3	25.6	28.6502	0.696085	4.2397	-	XXXX	U1426C-1H-1A, 131.5cm		1
346	U1426	C	1	H	1	A	132	1.32	1.32		1.32	30.4	28.2	25.4	28.5775	0.665588	4.34569	-	XXXX	U1426C-1H-1A, 132.0cm		1
346	U1426	C	1	H	1	A	132.5	1.325	1.325		1.325	30.4	28.1	25.5	28.5335	0.797576	4.17678	-	XXXX	U1426C-1H-1A, 132.5cm		1
346	U1426	C	1	H	1	A	133	1.33	1.33		1.33	30.3	28	25.5	28.4697	0.831184	4.08361	-	XXXX	U1426C-1H-1A, 133.0cm		1
346	U1426	C	1	H	1	A	133.5	1.335	1.335		1.335	30.8	28.6	26.1	28.863	0.755339	4.02368	-	XXXX	U1426C-1H-1A, 133.5cm		1
346	U1426	C	1	H	1	A	134	1.34	1.34		1.34	30.8	28.6	26.1	28.863	0.755339	4.02368	-	XXXX	U1426C-1H-1A, 134.0cm		1
346	U1426	C	1	H	1	A	134.5	1.345	1.345		1.345	30.9	28.6	25.9	28.8688	0.757989	4.24382	-	XXXX	U1426C-1H-1A, 134.5cm		1
346	U1426	C	1	H	1	A	135	1.35	1.35		1.35	30.5	28.2	25.5	28.5971	0.764105	4.26974	-	XXXX	U1426C-1H-1A, 135.0cm		1
346	U1426	C	1	H	1	A	135.5	1.355	1.355		1.355	30.4	28.1	25.5	28.5335	0.797576	4.17678	-	XXXX	U1426C-1H-1A, 135.5cm		1
346	U1426	C	1	H	1	A	136	1.36	1.36		1.36	30	27.8	25	28.3035	0.671079	4.37283	-	XXXX	U1426C-1H-1A, 136.0cm		1
346	U1426	C	1	H	1	A	136.5	1.365	1.365		1.365	30.3	28	25.3	28.4605	0.767217	4.28291	-	XXXX	U1426C-1H-1A, 136.5cm		1
346	U1426	C	1	H	1	A	137	1.37	1.37		1.37	29.8	27.6	24.9	28.1703	0.70611	4.28582	-	XXXX	U1426C-1H-1A, 137.0cm		1
346	U1426	C	1	H	1	A	137.5	1.375	1.375		1.375	29.7	27.4	24.5	28.038	0.712209	4.52597	-	XXXX	U1426C-1H-1A, 137.5cm		1
346	U1426	C	1	H	1	A	138	1.38	1.38		1.38	30.3	28	25.1	28.4513	0.703322	4.48296	-	XXXX	U1426C-1H-1A, 138.0cm		1
346	U1426	C	1	H	1	A	138.5	1.385	1.385		1.385	30	27.7	24.7	28.2406	0.675641	4.60527	-	XXXX	U1426C-1H-1A, 138.5cm		1
346	U1426	C	1	H	1	A	139	1.39	1.39		1.39	29.6	27.4	24.5	28.0226	0.644369	4.50202	-	XXXX	U1426C-1H-1A, 139.0cm		1
346	U1426	C	1	H	1	A	139.5	1.395	1.395		1.395	29.9	27.6	24.5	28.1671	0.64495	4.71407	-	XXXX	U1426C-1H-1A, 139.5cm		1
346	U1426	C	1	H	1	A	140	1.4	1.4		1.4	30.9	28.6	25.6	28.8552	0.663148	4.54034	-	XXXX	U1426C-1H-1A, 140.0cm		1
346	U1426	C	1	H	1	A	140.5	1.405	1.405		1.405	30.3	28	25.1	28.4513	0.703322	4.48296	-	XXXX	U1426C-1H-1A, 140.5cm		1
346	U1426	C	1	H	1	A	141	1.41	1.41		1.41	30.1	27.8	25.1	28.3233	0.770364	4.29622	-	XXXX	U1426C-1H-1A, 141.0cm		1
346	U1426	C	1	H	1	A	141.5	1.415	1.415		1.415	30.2	27.9	24.9	28.3781	0.672807	4.59057	-	XXXX	U1426C-1H-1A, 141.5cm		1
346	U1426	C	1	H	1	A	142	1.42	1.42		1.42	29.6	27.4	24.4	28.018	0.612057	4.60367	-	XXXX	U1426C-1H-1A, 142.0cm		1
346	U1426	C	1	H	1	A	142.5	1.425	1.425		1.425	29.8	27.5	24.5	28.1026	0.678509	4.62013	-	XXXX	U1426C-1H-1A, 142.5cm		1
346	U1426	C	1	H	1	A	143	1.43	1.43		1.43	29.9	27.6	24.7	28.1763	0.709211	4.51148	-	XXXX	U1426C-1H-1A, 143.0cm		1
346	U1426	C	1	H	1	A	143.5	1.435	1.435		1.435	29.8	27.5	24.6	28.1072	0.710706	4.51871	-	XXXX	U1426C-1H-1A, 143.5cm		1
346	U1426	C	1	H	1	A	144	1.44	1.44		1.44	30.1	27.8	24.7	28.3049	0.642209	4.69884	-	XXXX	U1426C-1H-1A, 144.0cm		1
346	U1426	C	1	H	1	A	144.5	1.445	1.445		1.445	30	27.6	24.4	28.1777	0.680508	4.83951	-	XXXX	U1426C-1H-1A, 144.5cm		1
346	U1426	C	1	H	1	A	145	1.45	1.45		1.45	30	27.7	24.6	28.236	0.643575	4.70643	-	XXXX	U1426C-1H-1A, 145.0cm		1
346	U1426	C	1	H	1	A	145.5	1.455	1.455		1.455	30.6	28.2	25	28.5893	0.67188	4.79269	-	XXXX	U1426C-1H-1A, 145.5cm		1
346	U1426	C	1	H	1	A	146	1.46	1.46		1.46	30.4	28	24.8	28.4527	0.674721	4.80812	-	XXXX	U1426C-1H-1A, 146.0cm		1
346	U1426	C	1	H	1	A	146.5	1.465	1.465		1.465	30.5	28.1	25	28.5257	0.705067	4.69991	-	XXXX	U1426C-1H-1A, 146.5cm		1
346	U1426	C	1	H	1	A	147	1.47	1.47		1.47	30.7	28.4	25.3	28.715	0.634183	4.65413	-	XXXX	U1426C-1H-1A, 147.0cm		1
346	U1426	C	1	H	1	A	147.5	1.475	1.475		1.475	30.9	28.6	25.5	28.8506	0.63157	4.63954	-	XXXX	U1426C-1H-1A, 147.5cm		1
346	U1426	C	1	H	1	A	148	1.48	1.48		1.48	30.8	28.5	25.6	28.792	0.696153	4.44817	-	XXXX	U1426C-1H-1A, 148.0cm		1
346	U1426	C	1	H	1	A	148.5	1.485	1.485		1.485	29.8	27.6	24.8	28.1657	0.673873	4.38663	-	XXXX	U1426C-1H-1A, 148.5cm		1
346	U1426	C	1	H	1	A	149	1.49	1.49		1.49	25.9	24.1	22	25.6266	0.679412	3.79061	-	XXXX	U1426C-1H-1A, 149.0cm		1
346	U1426	C	1	H	1	A	149.5	1.495	1.495		1.495	23.6	22	19.9	23.9866	0.560668	3.87901	-	XXXX	U1426C-1H-1A, 149.5cm		1
346	U1426	C	1	H	2	A	0	1.5	1.5		1.5	27.4	25.7	23.8	26.7918	0.653319	3.46151	-	XXXX	U1426C-1H-2A, 0.0cm	sub_sample_width 1.5 cm, median_filter_rank 0, data_decimate 100	1
346	U1426	C	1	H	2	A	0.5	1.505	1.505		1.505	28.3	26.4	23.9	27.2941	0.582595	4.08916	-	XXXX	U1426C-1H-2A, 0.5cm		1
346	U1426	C	1	H	2	A	1	1.51	1.51		1.51	28.2	26.3	24.3	27.2472	0.750262	3.5818	-	XXXX	U1426C-1H-2A, 1.0cm		1
346	U1426	C	1	H	2	A	1.5	1.515	1.515		1.515	27.9	25.8	23.1	26.8884	0.663732	4.38809	-	XXXX	U1426C-1H-2A, 1.5cm		1
346	U1426	C	1	H	2	A	2	1.52	1.52		1.52	28.8	26.7	24.1	27.5324	0.683653	4.22077	-	XXXX	U1426C-1H-2A, 2.0cm		1
346	U1426	C	1	H	2	A	2.5	1.525	1.525		1.525	29.3	27.1	24.2	27.814	0.648503	4.52391	-	XXXX	U1426C-1H-2A, 2.5cm		1
346	U1426	C	1	H	2	A	3	1.53	1.53		1.53	29.3	27.1	24.2	27.814	0.648503	4.52391	-	XXXX	U1426C-1H-2A, 3.0cm		1
346	U1426	C	1	H	2	A	3.5	1.535	1.535		1.535	29.3	27.2	24.3	27.8683	0.578914	4.49252	-	XXXX	U1426C-1H-2A, 3.5cm		1
346	U1426	C	1	H	2	A	4	1.54	1.54		1.54	30	27.7	24.9	28.2499	0.73983	4.40352	-	XXXX	U1426C-1H-2A, 4.0cm		1
346	U1426	C	1	H	2	A	4.5	1.545	1.545		1.545	29.8	27.6	24.9	28.1703	0.70611	4.28582	-	XXXX	U1426C-1H-2A, 4.5cm		1
346	U1426	C	1	H	2	A	5	1.55	1.55		1.55	30.4	28.2	25.4	28.5775	0.665588	4.34569	-	XXXX	U1426C-1H-2A, 5.0cm		1
346	U1426	C	1	H	2	A	5.5	1.555	1.555		1.555	31	28.7	25.9	28.9319	0.724903	4.33587	-	XXXX	U1426C-1H-2A, 5.5cm		1
346	U1426	C	1	H	2	A	6	1.56	1.56		1.56	30.5	28.2	25.3	28.588	0.700429	4.46893	-	XXXX	U1426C-1H-2A, 6.0cm		1
346	U1426	C	1	H	2	A	6.5	1.565	1.565		1.565	30.8	28.7	26	28.9066	0.624523	4.19078	-	XXXX	U1426C-1H-2A, 6.5cm		1
346	U1426	C	1	H	2	A	7	1.57	1.57		1.57	30.4	28.1	25.3	28.5243	0.733755	4.37603	-	XXXX	U1426C-1H-2A, 7.0cm		1
346	U1426	C	1	H	2	A	7.5	1.575	1.575		1.575	30.8	28.5	25.7	28.7965	0.72782	4.34912	-	XXXX	U1426C-1H-2A, 7.5cm		1
346	U1426	C	1	H	2	A	8	1.58	1.58		1.58	31.3	29	26.4	29.1429	0.783446	4.12078	-	XXXX	U1426C-1H-2A, 8.0cm		1
346	U1426	C	1	H	2	A	8.5	1.585	1.585		1.585	30.3	28	24.8	28.4375	0.60762	4.78447	-	XXXX	U1426C-1H-2A, 8.5cm		1
346	U1426	C	1	H	2	A	9	1.59	1.59		1.59	29.8	27.5	24.1	28.0841	0.549919	5.02778	-	XXXX	U1426C-1H-2A, 9.0cm		1
346	U1426	C	1	H	2	A	9.5	1.595	1.595		1.595	30.4	28.1	25.1	28.5151	0.670007	4.57602	-	XXXX	U1426C-1H-2A, 9.5cm		1
346	U1426	C	1	H	2	A	10	1.6	1.6		1.6	30.3	28	24.9	28.4421	0.639502	4.68378	-	XXXX	U1426C-1H-2A, 10.0cm		1
346	U1426	C	1	H	2	A	10.5	1.605	1.605		1.605	29.7	27.5	24.4	28.0826	0.578515	4.69785	-	XXXX	U1426C-1H-2A, 10.5cm		1
346	U1426	C	1	H	2	A	11	1.61	1.61		1.61	30.3	28	24.9	28.4421	0.639502	4.68378	-	XXXX	U1426C-1H-2A, 11.0cm		1
346	U1426	C	1	H	2	A	11.5	1.615	1.615		1.615	30.3	27.9	24.7	28.3842	0.676155	4.8159	-	XXXX	U1426C-1H-2A, 11.5cm		1
346	U1426	C	1	H	2	A	12	1.62	1.62		1.62	30.8	28.5	25.7	28.7965	0.72782	4.34912	-	XXXX	U1426C-1H-2A, 12.0cm		1
346	U1426	C	1	H	2	A	12.5	1.625	1.625		1.625	30.2	27.8	24.6	28.3155	0.677597	4.82373	-	XXXX	U1426C-1H-2A, 12.5cm		1
346	U1426	C	1	H	2	A	13	1.63	1.63		1.63	29.7	27.3	24	27.9654	0.652751	4.96597	-	XXXX	U1426C-1H-2A, 13.0cm		1
346	U1426	C	1	H	2	A	13.5	1.635	1.635		1.635	29.7	27.3	24.1	27.9701	0.684941	4.8635	-	XXXX	U1426C-1H-2A, 13.5cm		1
346	U1426	C	1	H	2	A	14	1.64	1.64		1.64	29.6	27.2	23.9	27.8959	0.654191	4.9743	-	XXXX	U1426C-1H-2A, 14.0cm		1
346	U1426	C	1	H	2	A	14.5	1.645	1.645		1.645	29	26.7	23.7	27.5447	0.690338	4.68125	-	XXXX	U1426C-1H-2A, 14.5cm		1
346	U1426	C	1	H	2	A	15	1.65	1.65		1.65	28.9	26.7	23.6	27.5244	0.588724	4.76042	-	XXXX	U1426C-1H-2A, 15.0cm		1
346	U1426	C	1	H	2	A	15.5	1.655	1.655		1.655	29	26.7	23.4	27.5306	0.5925	4.99231	-	XXXX	U1426C-1H-2A, 15.5cm		1
346	U1426	C	1	H	2	A	16	1.66	1.66		1.66	29.1	26.8	23.3	27.5915	0.526158	5.19172	-	XXXX	U1426C-1H-2A, 16.0cm		1
346	U1426	C	1	H	2	A	16.5	1.665	1.665		1.665	29.1	26.8	23.4	27.5962	0.55865	5.08766	-	XXXX	U1426C-1H-2A, 16.5cm		1
346	U1426	C	1	H	2	A	17	1.67	1.67		1.67	29.1	26.7	23.4	27.5462	0.661527	5.01662	-	XXXX	U1426C-1H-2A, 17.0cm		1
346	U1426	C	1	H	2	A	17.5	1.675	1.675		1.675	28.6	26.3	23	27.248	0.597936	5.02684	-	XXXX	U1426C-1H-2A, 17.5cm		1
346	U1426	C	1	H	2	A	18	1.68	1.68		1.68	28.8	26.6	23.5	27.454	0.590036	4.76844	-	XXXX	U1426C-1H-2A, 18.0cm		1
346	U1426	C	1	H	2	A	18.5	1.685	1.685		1.685	28.2	25.8	22.5	26.9074	0.675339	5.09595	-	XXXX	U1426C-1H-2A, 18.5cm		1
346	U1426	C	1	H	2	A	19	1.69	1.69		1.69	28.3	25.9	22.6	26.979	0.673764	5.08693	-	XXXX	U1426C-1H-2A, 19.0cm		1
346	U1426	C	1	H	2	A	19.5	1.695	1.695		1.695	28.1	25.8	22.8	26.9058	0.704373	4.75344	-	XXXX	U1426C-1H-2A, 19.5cm		1
346	U1426	C	1	H	2	A	20	1.7	1.7		1.7	28.2	26.1	23.5	27.1076	0.692545	4.26208	-	XXXX	U1426C-1H-2A, 20.0cm		1
346	U1426	C	1	H	2	A	20.5	1.705	1.705		1.705	28.1	26	23.4	27.0363	0.694059	4.2691	-	XXXX	U1426C-1H-2A, 20.5cm		1
346	U1426	C	1	H	2	A	21	1.71	1.71		1.71	26.7	24.6	21.7	26.0066	0.613921	4.69633	-	XXXX	U1426C-1H-2A, 21.0cm		1
346	U1426	C	1	H	2	A	21.5	1.715	1.715		1.715	27.1	24.9	21.6	26.2236	0.546187	5.12908	-	XXXX	U1426C-1H-2A, 21.5cm		1
346	U1426	C	1	H	2	A	22	1.72	1.72		1.72	27	24.8	21.6	26.1552	0.581352	5.02979	-	XXXX	U1426C-1H-2A, 22.0cm		1
346	U1426	C	1	H	2	A	22.5	1.725	1.725		1.725	27.9	25.5	21.9	26.6774	0.580542	5.44541	-	XXXX	U1426C-1H-2A, 22.5cm		1
346	U1426	C	1	H	2	A	23	1.73	1.73		1.73	27.8	25.4	21.7	26.6004	0.548768	5.56353	-	XXXX	U1426C-1H-2A, 23.0cm		1
346	U1426	C	1	H	2	A	23.5	1.735	1.735		1.735	27.6	25.2	21.6	26.4602	0.584877	5.47572	-	XXXX	U1426C-1H-2A, 23.5cm		1
346	U1426	C	1	H	2	A	24	1.74	1.74		1.74	27.1	24.8	21.3	26.157	0.552237	5.38218	-	XXXX	U1426C-1H-2A, 24.0cm		1
346	U1426	C	1	H	2	A	24.5	1.745	1.745		1.745	27.5	25.1	21.5	26.3875	0.586342	5.48595	-	XXXX	U1426C-1H-2A, 24.5cm		1
346	U1426	C	1	H	2	A	25	1.75	1.75		1.75	27.7	25.4	22.3	26.6131	0.677463	4.89348	-	XXXX	U1426C-1H-2A, 25.0cm		1
346	U1426	C	1	H	2	A	25.5	1.755	1.755		1.755	27.6	25.3	22	26.5311	0.612169	5.11683	-	XXXX	U1426C-1H-2A, 25.5cm		1
346	U1426	C	1	H	2	A	26	1.76	1.76		1.76	27.8	25.4	21.8	26.6052	0.581977	5.45545	-	XXXX	U1426C-1H-2A, 26.0cm		1
346	U1426	C	1	H	2	A	26.5	1.765	1.765		1.765	27.4	25.1	21.6	26.3761	0.548092	5.35211	-	XXXX	U1426C-1H-2A, 26.5cm		1
346	U1426	C	1	H	2	A	27	1.77	1.77		1.77	27.4	25.1	21.7	26.381	0.5816	5.24368	-	XXXX	U1426C-1H-2A, 27.0cm		1
346	U1426	C	1	H	2	A	27.5	1.775	1.775		1.775	26.9	24.7	21.5	26.0818	0.582777	5.03905	-	XXXX	U1426C-1H-2A, 27.5cm		1
346	U1426	C	1	H	2	A	28	1.78	1.78		1.78	27	24.8	21.6	26.1552	0.581352	5.02979	-	XXXX	U1426C-1H-2A, 28.0cm		1
346	U1426	C	1	H	2	A	28.5	1.785	1.785		1.785	26.7	24.6	21.5	25.9968	0.545774	4.9138	-	XXXX	U1426C-1H-2A, 28.5cm		1
346	U1426	C	1	H	2	A	29	1.79	1.79		1.79	26.5	24.4	21.5	25.859	0.616874	4.71337	-	XXXX	U1426C-1H-2A, 29.0cm		1
346	U1426	C	1	H	2	A	29.5	1.795	1.795		1.795	26.7	24.6	21.6	26.0017	0.579836	4.80495	-	XXXX	U1426C-1H-2A, 29.5cm		1
346	U1426	C	1	H	2	A	30	1.8	1.8		1.8	27.5	25.3	22	26.515	0.540879	5.09176	-	XXXX	U1426C-1H-2A, 30.0cm		1
346	U1426	C	1	H	2	A	30.5	1.805	1.805		1.805	27.1	24.9	22	26.2431	0.681331	4.69648	-	XXXX	U1426C-1H-2A, 30.5cm		1
346	U1426	C	1	H	2	A	31	1.81	1.81		1.81	26.5	24.5	21.7	25.9214	0.577115	4.57063	-	XXXX	U1426C-1H-2A, 31.0cm		1
346	U1426	C	1	H	2	A	31.5	1.815	1.815		1.815	26	24.1	21.3	25.6081	0.509444	4.57802	-	XXXX	U1426C-1H-2A, 31.5cm		1
346	U1426	C	1	H	2	A	32	1.82	1.82		1.82	27	24.9	22.1	26.2317	0.643482	4.56359	-	XXXX	U1426C-1H-2A, 32.0cm		1
346	U1426	C	1	H	2	A	32.5	1.825	1.825		1.825	28.4	26	22.8	27.0551	0.705139	4.97234	-	XXXX	U1426C-1H-2A, 32.5cm		1
346	U1426	C	1	H	2	A	33	1.83	1.83		1.83	28.6	26.2	22.9	27.1928	0.6691	5.06017	-	XXXX	U1426C-1H-2A, 33.0cm		1
346	U1426	C	1	H	2	A	33.5	1.835	1.835		1.835	29.8	27.3	24.1	27.9854	0.752953	4.88751	-	XXXX	U1426C-1H-2A, 33.5cm		1
346	U1426	C	1	H	2	A	34	1.84	1.84		1.84	30	27.5	24	28.1101	0.653704	5.17799	-	XXXX	U1426C-1H-2A, 34.0cm		1
346	U1426	C	1	H	2	A	34.5	1.845	1.845		1.845	29.2	26.7	23.6	27.5711	0.795432	4.83337	-	XXXX	U1426C-1H-2A, 34.5cm		1
346	U1426	C	1	H	2	A	35	1.85	1.85		1.85	30.6	27.8	24.2	28.3581	0.819768	5.32525	-	XXXX	U1426C-1H-2A, 35.0cm		1
346	U1426	C	1	H	2	A	35.5	1.855	1.855		1.855	30.8	28	24.1	28.4815	0.721777	5.61299	-	XXXX	U1426C-1H-2A, 35.5cm		1
346	U1426	C	1	H	2	A	36	1.86	1.86		1.86	31.5	28.6	24.6	28.9	0.747536	5.68099	-	XXXX	U1426C-1H-2A, 36.0cm		1
346	U1426	C	1	H	2	A	36.5	1.865	1.865		1.865	31.4	28.5	24.6	28.8369	0.780303	5.5894	-	XXXX	U1426C-1H-2A, 36.5cm		1
346	U1426	C	1	H	2	A	37	1.87	1.87		1.87	31.1	28.2	24.5	28.6422	0.848056	5.41462	-	XXXX	U1426C-1H-2A, 37.0cm		1
346	U1426	C	1	H	2	A	37.5	1.875	1.875		1.875	29.6	27	23.4	27.7735	0.697443	5.35014	-	XXXX	U1426C-1H-2A, 37.5cm		1
346	U1426	C	1	H	2	A	38	1.88	1.88		1.88	29.1	26.6	23.1	27.4821	0.667132	5.25848	-	XXXX	U1426C-1H-2A, 38.0cm		1
346	U1426	C	1	H	2	A	38.5	1.885	1.885		1.885	29.1	26.6	23.2	27.4868	0.699615	5.15393	-	XXXX	U1426C-1H-2A, 38.5cm		1
346	U1426	C	1	H	2	A	39	1.89	1.89		1.89	29.3	26.8	23.3	27.6227	0.664081	5.24024	-	XXXX	U1426C-1H-2A, 39.0cm		1
346	U1426	C	1	H	2	A	39.5	1.895	1.895		1.895	28.9	26.4	23	27.3456	0.70282	5.1719	-	XXXX	U1426C-1H-2A, 39.5cm		1
346	U1426	C	1	H	2	A	40	1.9	1.9		1.9	28.5	26	22.6	27.0615	0.709356	5.20848	-	XXXX	U1426C-1H-2A, 40.0cm		1
346	U1426	C	1	H	2	A	40.5	1.905	1.905		1.905	28.1	25.7	22.4	26.8357	0.676924	5.10503	-	XXXX	U1426C-1H-2A, 40.5cm		1
346	U1426	C	1	H	2	A	41	1.91	1.91		1.91	28.3	25.9	22.8	26.9885	0.739784	4.87541	-	XXXX	U1426C-1H-2A, 41.0cm		1
346	U1426	C	1	H	2	A	41.5	1.915	1.915		1.915	27.8	25.4	22.3	26.6291	0.748372	4.91851	-	XXXX	U1426C-1H-2A, 41.5cm		1
346	U1426	C	1	H	2	A	42	1.92	1.92		1.92	27.6	25.3	22.2	26.5407	0.679053	4.9022	-	XXXX	U1426C-1H-2A, 42.0cm		1
346	U1426	C	1	H	2	A	42.5	1.925	1.925		1.925	27.5	25.3	22.2	26.5246	0.607898	4.87713	-	XXXX	U1426C-1H-2A, 42.5cm		1
346	U1426	C	1	H	2	A	43	1.93	1.93		1.93	27.7	25.4	22.3	26.6131	0.677463	4.89348	-	XXXX	U1426C-1H-2A, 43.0cm		1
346	U1426	C	1	H	2	A	43.5	1.935	1.935		1.935	27.8	25.5	22.3	26.6805	0.642553	4.99149	-	XXXX	U1426C-1H-2A, 43.5cm		1
346	U1426	C	1	H	2	A	44	1.94	1.94		1.94	27.4	25.2	22.5	26.4714	0.743899	4.45826	-	XXXX	U1426C-1H-2A, 44.0cm		1
346	U1426	C	1	H	2	A	44.5	1.945	1.945		1.945	27.6	25.3	22.2	26.5407	0.679053	4.9022	-	XXXX	U1426C-1H-2A, 44.5cm		1
346	U1426	C	1	H	2	A	45	1.95	1.95		1.95	26.6	24.4	21.6	25.8803	0.723649	4.63006	-	XXXX	U1426C-1H-2A, 45.0cm		1
346	U1426	C	1	H	2	A	45.5	1.955	1.955		1.955	25.8	23.7	20.8	25.3368	0.627538	4.77475	-	XXXX	U1426C-1H-2A, 45.5cm		1
346	U1426	C	1	H	2	A	46	1.96	1.96		1.96	26	23.9	20.7	25.472	0.520848	5.0894	-	XXXX	U1426C-1H-2A, 46.0cm		1
346	U1426	C	1	H	2	A	46.5	1.965	1.965		1.965	22.1	20.5	18.2	22.7748	0.507196	4.23073	-	XXXX	U1426C-1H-2A, 46.5cm		1
346	U1426	C	1	H	2	A	47	1.97	1.97		1.97	21.8	20.4	18.5	22.6786	0.49971	3.70499	-	XXXX	U1426C-1H-2A, 47.0cm		1
346	U1426	C	1	H	2	A	47.5	1.975	1.975		1.975	28.2	26	23.7	27.0665	0.863575	3.98208	-	XXXX	U1426C-1H-2A, 47.5cm		1
346	U1426	C	1	H	2	A	48	1.98	1.98		1.98	26.2	24	21.2	25.5832	0.73064	4.66392	-	XXXX	U1426C-1H-2A, 48.0cm		1
346	U1426	C	1	H	2	A	48.5	1.985	1.985		1.985	26.4	24.3	21.4	25.7849	0.618365	4.72197	-	XXXX	U1426C-1H-2A, 48.5cm		1
346	U1426	C	1	H	2	A	49	1.99	1.99		1.99	26.3	24.3	21.6	25.7783	0.614282	4.47814	-	XXXX	U1426C-1H-2A, 49.0cm		1
346	U1426	C	1	H	2	A	49.5	1.995	1.995		1.995	26.3	24.1	21.3	25.6577	0.728874	4.65537	-	XXXX	U1426C-1H-2A, 49.5cm		1
346	U1426	C	1	H	2	A	50	2	2		2	26.5	24.3	21.7	25.8162	0.793924	4.42076	-	XXXX	U1426C-1H-2A, 50.0cm		1
346	U1426	C	1	H	2	A	50.5	2.005	2.005		2.005	26.9	24.7	21.9	26.1014	0.71853	4.60521	-	XXXX	U1426C-1H-2A, 50.5cm		1
346	U1426	C	1	H	2	A	51	2.01	2.01		2.01	27	24.7	21.9	26.1177	0.790468	4.63065	-	XXXX	U1426C-1H-2A, 51.0cm		1
346	U1426	C	1	H	2	A	51.5	2.015	2.015		2.015	27	24.7	22.1	26.1275	0.858345	4.41514	-	XXXX	U1426C-1H-2A, 51.5cm		1
346	U1426	C	1	H	2	A	52	2.02	2.02		2.02	26.8	24.6	21.9	26.0328	0.754287	4.5053	-	XXXX	U1426C-1H-2A, 52.0cm		1
346	U1426	C	1	H	2	A	52.5	2.025	2.025		2.025	27.2	24.9	22.1	26.2642	0.78678	4.61422	-	XXXX	U1426C-1H-2A, 52.5cm		1
346	U1426	C	1	H	2	A	53	2.03	2.03		2.03	27	24.8	21.9	26.1698	0.682938	4.70487	-	XXXX	U1426C-1H-2A, 53.0cm		1
346	U1426	C	1	H	2	A	53.5	2.035	2.035		2.035	27	24.8	22.1	26.1796	0.750778	4.48943	-	XXXX	U1426C-1H-2A, 53.5cm		1
346	U1426	C	1	H	2	A	54	2.04	2.04		2.04	26.6	24.5	21.7	25.9378	0.649568	4.59617	-	XXXX	U1426C-1H-2A, 54.0cm		1
346	U1426	C	1	H	2	A	54.5	2.045	2.045		2.045	26.5	24.5	21.8	25.9263	0.611384	4.46221	-	XXXX	U1426C-1H-2A, 54.5cm		1
346	U1426	C	1	H	2	A	55	2.05	2.05		2.05	26.7	24.6	21.9	26.0164	0.682163	4.47981	-	XXXX	U1426C-1H-2A, 55.0cm		1
346	U1426	C	1	H	2	A	55.5	2.055	2.055		2.055	27.1	24.9	22.1	26.2479	0.715175	4.5889	-	XXXX	U1426C-1H-2A, 55.5cm		1
346	U1426	C	1	H	2	A	56	2.06	2.06		2.06	27.5	25.3	22.4	26.5343	0.675008	4.6634	-	XXXX	U1426C-1H-2A, 56.0cm		1
346	U1426	C	1	H	2	A	56.5	2.065	2.065		2.065	27.6	25.4	22.8	26.6212	0.774096	4.33713	-	XXXX	U1426C-1H-2A, 56.5cm		1
346	U1426	C	1	H	2	A	57	2.07	2.07		2.07	26.6	24.4	21.5	25.8754	0.689478	4.73898	-	XXXX	U1426C-1H-2A, 57.0cm		1
346	U1426	C	1	H	2	A	57.5	2.075	2.075		2.075	27	24.7	21.9	26.1177	0.790468	4.63065	-	XXXX	U1426C-1H-2A, 57.5cm		1
346	U1426	C	1	H	2	A	58	2.08	2.08		2.08	26.8	24.6	21.8	26.0278	0.720225	4.61344	-	XXXX	U1426C-1H-2A, 58.0cm		1
346	U1426	C	1	H	2	A	58.5	2.085	2.085		2.085	27.1	24.7	21.7	26.1242	0.794671	4.87252	-	XXXX	U1426C-1H-2A, 58.5cm		1
346	U1426	C	1	H	2	A	59	2.09	2.09		2.09	26.8	24.5	21.4	25.9558	0.692174	4.97393	-	XXXX	U1426C-1H-2A, 59.0cm		1
346	U1426	C	1	H	2	A	59.5	2.095	2.095		2.095	25.8	23.7	21.1	25.3518	0.731765	4.4428	-	XXXX	U1426C-1H-2A, 59.5cm		1
346	U1426	C	1	H	2	A	60	2.1	2.1		2.1	25.4	23.3	20.8	25.0548	0.77402	4.36433	-	XXXX	U1426C-1H-2A, 60.0cm		1
346	U1426	C	1	H	2	A	60.5	2.105	2.105		2.105	25.5	23.5	20.7	25.1743	0.591327	4.65516	-	XXXX	U1426C-1H-2A, 60.5cm		1
346	U1426	C	1	H	2	A	61	2.11	2.11		2.11	26.7	24.4	21.6	25.8967	0.796092	4.65567	-	XXXX	U1426C-1H-2A, 61.0cm		1
346	U1426	C	1	H	2	A	61.5	2.115	2.115		2.115	26.8	24.5	21.4	25.9558	0.692174	4.97393	-	XXXX	U1426C-1H-2A, 61.5cm		1
346	U1426	C	1	H	2	A	62	2.12	2.12		2.12	26.7	24.5	21.5	25.9443	0.653746	4.83926	-	XXXX	U1426C-1H-2A, 62.0cm		1
346	U1426	C	1	H	2	A	62.5	2.125	2.125		2.125	26.8	24.5	21.5	25.9607	0.72616	4.86481	-	XXXX	U1426C-1H-2A, 62.5cm		1
346	U1426	C	1	H	2	A	63	2.13	2.13		2.13	26.5	24.2	21.2	25.7387	0.731466	4.89181	-	XXXX	U1426C-1H-2A, 63.0cm		1
346	U1426	C	1	H	2	A	63.5	2.135	2.135		2.135	25.7	23.5	20.6	25.2029	0.704876	4.81897	-	XXXX	U1426C-1H-2A, 63.5cm		1
346	U1426	C	1	H	2	A	64	2.14	2.14		2.14	25.7	23.5	20.7	25.2079	0.739658	4.70749	-	XXXX	U1426C-1H-2A, 64.0cm		1
346	U1426	C	1	H	2	A	64.5	2.145	2.145		2.145	25.6	23.5	20.6	25.1861	0.630684	4.79281	-	XXXX	U1426C-1H-2A, 64.5cm		1
346	U1426	C	1	H	2	A	65	2.15	2.15		2.15	25.6	23.5	20.5	25.181	0.595853	4.90455	-	XXXX	U1426C-1H-2A, 65.0cm		1
346	U1426	C	1	H	2	A	65.5	2.155	2.155		2.155	25.6	23.4	20.6	25.1323	0.7415	4.71638	-	XXXX	U1426C-1H-2A, 65.5cm		1
346	U1426	C	1	H	2	A	66	2.16	2.16		2.16	25.9	23.6	20.8	25.3	0.81167	4.72478	-	XXXX	U1426C-1H-2A, 66.0cm		1
346	U1426	C	1	H	2	A	66.5	2.165	2.165		2.165	26.1	23.7	20.5	25.372	0.745413	5.18708	-	XXXX	U1426C-1H-2A, 66.5cm		1
346	U1426	C	1	H	2	A	67	2.17	2.17		2.17	25.4	23.1	20	24.9062	0.71698	5.10863	-	XXXX	U1426C-1H-2A, 67.0cm		1
346	U1426	C	1	H	2	A	67.5	2.175	2.175		2.175	25.9	23.5	20.3	25.2215	0.74923	5.20729	-	XXXX	U1426C-1H-2A, 67.5cm		1
346	U1426	C	1	H	2	A	68	2.18	2.18		2.18	25.9	23.5	20.1	25.2115	0.680202	5.43255	-	XXXX	U1426C-1H-2A, 68.0cm		1
346	U1426	C	1	H	2	A	68.5	2.185	2.185		2.185	26	23.6	20.1	25.2819	0.644014	5.53453	-	XXXX	U1426C-1H-2A, 68.5cm		1
346	U1426	C	1	H	2	A	69	2.19	2.19		2.19	26.1	23.6	20.3	25.3086	0.786874	5.33546	-	XXXX	U1426C-1H-2A, 69.0cm		1
346	U1426	C	1	H	2	A	69.5	2.195	2.195		2.195	26	23.5	20.2	25.2333	0.788903	5.34596	-	XXXX	U1426C-1H-2A, 69.5cm		1
346	U1426	C	1	H	2	A	70	2.2	2.2		2.2	26	23.5	20.2	25.2333	0.788903	5.34596	-	XXXX	U1426C-1H-2A, 70.0cm		1
346	U1426	C	1	H	2	A	70.5	2.205	2.205		2.205	26.4	23.8	20.6	25.4804	0.890607	5.22906	-	XXXX	U1426C-1H-2A, 70.5cm		1
346	U1426	C	1	H	2	A	71	2.21	2.21		2.21	26.1	23.6	20.4	25.3136	0.821261	5.22326	-	XXXX	U1426C-1H-2A, 71.0cm		1
346	U1426	C	1	H	2	A	71.5	2.215	2.215		2.215	26.6	24	20.9	25.6347	0.920241	5.09822	-	XXXX	U1426C-1H-2A, 71.5cm		1
346	U1426	C	1	H	2	A	72	2.22	2.22		2.22	27.2	24.5	21.2	26.0117	0.913869	5.29512	-	XXXX	U1426C-1H-2A, 72.0cm		1
346	U1426	C	1	H	2	A	72.5	2.225	2.225		2.225	27.7	25	21.6	26.373	0.869561	5.3544	-	XXXX	U1426C-1H-2A, 72.5cm		1
346	U1426	C	1	H	2	A	73	2.23	2.23		2.23	26.9	24.3	21.1	25.8525	0.879622	5.17938	-	XXXX	U1426C-1H-2A, 73.0cm		1
346	U1426	C	1	H	2	A	73.5	2.235	2.235		2.235	27.1	24.5	21.1	25.9904	0.807903	5.37939	-	XXXX	U1426C-1H-2A, 73.5cm		1
346	U1426	C	1	H	2	A	74	2.24	2.24		2.24	26.9	24.3	21.1	25.8525	0.879622	5.17938	-	XXXX	U1426C-1H-2A, 74.0cm		1
346	U1426	C	1	H	2	A	74.5	2.245	2.245		2.245	27.6	24.9	21.6	26.3049	0.905051	5.25566	-	XXXX	U1426C-1H-2A, 74.5cm		1
346	U1426	C	1	H	2	A	75	2.25	2.25		2.25	27.2	24.7	21.6	26.1357	0.832851	5.00653	-	XXXX	U1426C-1H-2A, 75.0cm		1
346	U1426	C	1	H	2	A	75.5	2.255	2.255		2.255	29.2	26.8	23.6	27.6211	0.692514	4.90441	-	XXXX	U1426C-1H-2A, 75.5cm		1
346	U1426	C	1	H	2	A	76	2.26	2.26		2.26	30.4	27.9	24.7	28.3993	0.743322	4.83961	-	XXXX	U1426C-1H-2A, 76.0cm		1
346	U1426	C	1	H	2	A	76.5	2.265	2.265		2.265	31.3	28.8	25.7	29.0155	0.76085	4.67167	-	XXXX	U1426C-1H-2A, 76.5cm		1
346	U1426	C	1	H	2	A	77	2.27	2.27		2.27	30.2	27.9	25.1	28.3874	0.736775	4.3897	-	XXXX	U1426C-1H-2A, 77.0cm		1
346	U1426	C	1	H	2	A	77.5	2.275	2.275		2.275	30.3	28.1	25.3	28.5092	0.666949	4.35242	-	XXXX	U1426C-1H-2A, 77.5cm		1
346	U1426	C	1	H	2	A	78	2.28	2.28		2.28	30.6	28.3	25.5	28.6607	0.73077	4.3625	-	XXXX	U1426C-1H-2A, 78.0cm		1
346	U1426	C	1	H	2	A	78.5	2.285	2.285		2.285	30.5	28.2	25.6	28.6017	0.79597	4.17043	-	XXXX	U1426C-1H-2A, 78.5cm		1
346	U1426	C	1	H	2	A	79	2.29	2.29		2.29	30.6	28.4	25.7	28.7182	0.694686	4.23325	-	XXXX	U1426C-1H-2A, 79.0cm		1
346	U1426	C	1	H	2	A	79.5	2.295	2.295		2.295	31.4	29	26.3	29.1532	0.817495	4.24162	-	XXXX	U1426C-1H-2A, 79.5cm		1
346	U1426	C	1	H	2	A	80	2.3	2.3		2.3	31.7	29.2	26.3	29.293	0.817061	4.44715	-	XXXX	U1426C-1H-2A, 80.0cm		1
346	U1426	C	1	H	2	A	80.5	2.305	2.305		2.305	32	29.6	26.8	29.5491	0.776952	4.30084	-	XXXX	U1426C-1H-2A, 80.5cm		1
346	U1426	C	1	H	2	A	81	2.31	2.31		2.31	32.9	30.5	28	30.1545	0.855612	3.96084	-	XXXX	U1426C-1H-2A, 81.0cm		1
346	U1426	C	1	H	2	A	81.5	2.315	2.315		2.315	32	29.7	27.4	29.6232	0.866257	3.79119	-	XXXX	U1426C-1H-2A, 81.5cm		1
346	U1426	C	1	H	2	A	82	2.32	2.32		2.32	32.5	30.2	27.8	29.9483	0.827364	3.85985	-	XXXX	U1426C-1H-2A, 82.0cm		1
346	U1426	C	1	H	2	A	82.5	2.325	2.325		2.325	32.7	30.3	28.1	30.0372	0.951095	3.68805	-	XXXX	U1426C-1H-2A, 82.5cm		1
346	U1426	C	1	H	2	A	83	2.33	2.33		2.33	32.8	30.5	28.3	30.1534	0.884256	3.65556	-	XXXX	U1426C-1H-2A, 83.0cm		1
346	U1426	C	1	H	2	A	83.5	2.335	2.335		2.335	32.9	30.6	28.5	30.223	0.913354	3.55692	-	XXXX	U1426C-1H-2A, 83.5cm		1
346	U1426	C	1	H	2	A	84	2.34	2.34		2.34	33.3	31	29	30.487	0.937344	3.44539	-	XXXX	U1426C-1H-2A, 84.0cm		1
346	U1426	C	1	H	2	A	84.5	2.345	2.345		2.345	33.4	31.2	29.2	30.6018	0.871516	3.4143	-	XXXX	U1426C-1H-2A, 84.5cm		1
346	U1426	C	1	H	2	A	85	2.35	2.35		2.35	33.5	31.3	29.4	30.6706	0.900425	3.31775	-	XXXX	U1426C-1H-2A, 85.0cm		1
346	U1426	C	1	H	2	A	85.5	2.355	2.355		2.355	33.9	31.6	29.7	30.8771	0.957753	3.32739	-	XXXX	U1426C-1H-2A, 85.5cm		1
346	U1426	C	1	H	2	A	86	2.36	2.36		2.36	34	31.8	29.9	30.9907	0.89265	3.29712	-	XXXX	U1426C-1H-2A, 86.0cm		1
346	U1426	C	1	H	2	A	86.5	2.365	2.365		2.365	33.9	31.7	30	30.9357	0.954727	3.11863	-	XXXX	U1426C-1H-2A, 86.5cm		1
346	U1426	C	1	H	2	A	87	2.37	2.37		2.37	33.9	31.8	30	30.9811	0.861061	3.18393	-	XXXX	U1426C-1H-2A, 87.0cm		1
346	U1426	C	1	H	2	A	87.5	2.375	2.375		2.375	34.1	31.9	30.3	31.0675	0.98166	3.0204	-	XXXX	U1426C-1H-2A, 87.5cm		1
346	U1426	C	1	H	2	A	88	2.38	2.38		2.38	34.4	32.4	30.7	31.3521	0.821189	3.04917	-	XXXX	U1426C-1H-2A, 88.0cm		1
346	U1426	C	1	H	2	A	88.5	2.385	2.385		2.385	34.6	32.5	30.8	31.4291	0.880874	3.06731	-	XXXX	U1426C-1H-2A, 88.5cm		1
346	U1426	C	1	H	2	A	89	2.39	2.39		2.39	35.2	32.9	31.1	31.7034	0.966468	3.18542	-	XXXX	U1426C-1H-2A, 89.0cm		1
346	U1426	C	1	H	2	A	89.5	2.395	2.395		2.395	35.3	33.1	31.2	31.8102	0.873293	3.2455	-	XXXX	U1426C-1H-2A, 89.5cm		1
346	U1426	C	1	H	2	A	90	2.4	2.4		2.4	35.5	33.1	31	31.8291	0.935022	3.46706	-	XXXX	U1426C-1H-2A, 90.0cm		1
346	U1426	C	1	H	2	A	90.5	2.405	2.405		2.405	34.7	32.3	29.9	31.3143	0.858257	3.77453	-	XXXX	U1426C-1H-2A, 90.5cm		1
346	U1426	C	1	H	2	A	91	2.41	2.41		2.41	34.6	32.3	30	31.3047	0.826701	3.66164	-	XXXX	U1426C-1H-2A, 91.0cm		1
346	U1426	C	1	H	2	A	91.5	2.415	2.415		2.415	33.9	31.7	29.4	30.9095	0.773277	3.66816	-	XXXX	U1426C-1H-2A, 91.5cm		1
346	U1426	C	1	H	2	A	92	2.42	2.42		2.42	34.7	32.7	31	31.541	0.817109	3.03851	-	XXXX	U1426C-1H-2A, 92.0cm		1
346	U1426	C	1	H	2	A	92.5	2.425	2.425		2.425	35.2	33.2	31.6	31.858	0.840126	2.93237	-	XXXX	U1426C-1H-2A, 92.5cm		1
346	U1426	C	1	H	2	A	93	2.43	2.43		2.43	34.8	32.9	31.4	31.6613	0.813492	2.83181	-	XXXX	U1426C-1H-2A, 93.0cm		1
346	U1426	C	1	H	2	A	93.5	2.435	2.435		2.435	34.9	32.8	31.5	31.6348	0.995867	2.70029	-	XXXX	U1426C-1H-2A, 93.5cm		1
346	U1426	C	1	H	2	A	94	2.44	2.44		2.44	35.6	33.5	31.8	32.0536	0.866515	3.03204	-	XXXX	U1426C-1H-2A, 94.0cm		1
346	U1426	C	1	H	2	A	94.5	2.445	2.445		2.445	35.2	33.3	31.9	31.9151	0.837959	2.73107	-	XXXX	U1426C-1H-2A, 94.5cm		1
346	U1426	C	1	H	2	A	95	2.45	2.45		2.45	35.4	33.3	31.9	31.9424	0.958168	2.77388	-	XXXX	U1426C-1H-2A, 95.0cm		1
346	U1426	C	1	H	2	A	95.5	2.455	2.455		2.455	36	33.8	31.9	32.2441	0.863351	3.21883	-	XXXX	U1426C-1H-2A, 95.5cm		1
346	U1426	C	1	H	2	A	96	2.46	2.46		2.46	36.5	34.3	32.5	32.5551	0.885541	3.11298	-	XXXX	U1426C-1H-2A, 96.0cm		1
346	U1426	C	1	H	2	A	96.5	2.465	2.465		2.465	34.3	32.3	30.9	31.302	0.912902	2.78294	-	XXXX	U1426C-1H-2A, 96.5cm		1
346	U1426	C	1	H	2	A	97	2.47	2.47		2.47	35.4	33.4	31.9	31.9866	0.867022	2.83757	-	XXXX	U1426C-1H-2A, 97.0cm		1
346	U1426	C	1	H	2	A	97.5	2.475	2.475		2.475	35	33.1	31.6	31.7863	0.810857	2.82553	-	XXXX	U1426C-1H-2A, 97.5cm		1
346	U1426	C	1	H	2	A	98	2.48	2.48		2.48	35.4	33.7	32.6	32.1487	0.801963	2.41479	-	XXXX	U1426C-1H-2A, 98.0cm		1
346	U1426	C	1	H	2	A	98.5	2.485	2.485		2.485	35.5	33.9	32.9	32.2629	0.769548	2.30206	-	XXXX	U1426C-1H-2A, 98.5cm		1
346	U1426	C	1	H	2	A	99	2.49	2.49		2.49	35.7	34	32.9	32.3336	0.798231	2.40767	-	XXXX	U1426C-1H-2A, 99.0cm		1
346	U1426	C	1	H	2	A	99.5	2.495	2.495		2.495	35.6	33.9	32.8	32.2721	0.79947	2.41003	-	XXXX	U1426C-1H-2A, 99.5cm		1
346	U1426	C	1	H	2	A	100	2.5	2.5		2.5	35.8	34.3	33.3	32.4951	0.70569	2.27234	-	XXXX	U1426C-1H-2A, 100.0cm		1
346	U1426	C	1	H	2	A	100.5	2.505	2.505		2.505	36	34.5	33.5	32.6173	0.703565	2.26811	-	XXXX	U1426C-1H-2A, 100.5cm		1
346	U1426	C	1	H	2	A	101	2.51	2.51		2.51	35.8	34.3	33.3	32.4951	0.70569	2.27234	-	XXXX	U1426C-1H-2A, 101.0cm		1
346	U1426	C	1	H	2	A	101.5	2.515	2.515		2.515	35.6	34	33	32.3244	0.768364	2.29987	-	XXXX	U1426C-1H-2A, 101.5cm		1
346	U1426	C	1	H	2	A	102	2.52	2.52		2.52	36.4	34.9	33.8	32.8564	0.670143	2.34512	-	XXXX	U1426C-1H-2A, 102.0cm		1
346	U1426	C	1	H	2	A	102.5	2.525	2.525		2.525	37.1	35.7	34.6	33.3254	0.604393	2.30706	-	XXXX	U1426C-1H-2A, 102.5cm		1
346	U1426	C	1	H	2	A	103	2.53	2.53		2.53	36	34.6	33.5	32.6608	0.614199	2.3309	-	XXXX	U1426C-1H-2A, 103.0cm		1
346	U1426	C	1	H	2	A	103.5	2.535	2.535		2.535	35.8	34.3	33.2	32.4909	0.676202	2.35857	-	XXXX	U1426C-1H-2A, 103.5cm		1
346	U1426	C	1	H	2	A	104	2.54	2.54		2.54	36.7	35.3	34.3	33.0892	0.637003	2.2308	-	XXXX	U1426C-1H-2A, 104.0cm		1
346	U1426	C	1	H	2	A	104.5	2.545	2.545		2.545	36.8	35.2	33.9	33.0427	0.66742	2.5295	-	XXXX	U1426C-1H-2A, 104.5cm		1
346	U1426	C	1	H	2	A	105	2.55	2.55		2.55	37.1	35.6	34.4	33.2744	0.634349	2.4143	-	XXXX	U1426C-1H-2A, 105.0cm		1
346	U1426	C	1	H	2	A	105.5	2.555	2.555		2.555	37.6	36.3	35.3	33.6742	0.570546	2.19059	-	XXXX	U1426C-1H-2A, 105.5cm		1
346	U1426	C	1	H	2	A	106	2.56	2.56		2.56	36.2	35	34.2	32.89	0.58126	2.02524	-	XXXX	U1426C-1H-2A, 106.0cm		1
346	U1426	C	1	H	2	A	106.5	2.565	2.565		2.565	36.1	34.8	33.9	32.7777	0.612293	2.13475	-	XXXX	U1426C-1H-2A, 106.5cm		1
346	U1426	C	1	H	2	A	107	2.57	2.57		2.57	36.4	35.1	34	32.9511	0.551164	2.29922	-	XXXX	U1426C-1H-2A, 107.0cm		1
346	U1426	C	1	H	2	A	107.5	2.575	2.575		2.575	36.4	35.1	33.9	32.9469	0.52195	2.38444	-	XXXX	U1426C-1H-2A, 107.5cm		1
346	U1426	C	1	H	2	A	108	2.58	2.58		2.58	36.8	35.5	34.5	33.1965	0.577053	2.20618	-	XXXX	U1426C-1H-2A, 108.0cm		1
346	U1426	C	1	H	2	A	108.5	2.585	2.585		2.585	36.5	35.3	34.2	33.0588	0.491198	2.2743	-	XXXX	U1426C-1H-2A, 108.5cm		1
346	U1426	C	1	H	2	A	109	2.59	2.59		2.59	36.4	35.3	34.4	33.054	0.491227	2.08411	-	XXXX	U1426C-1H-2A, 109.0cm		1
346	U1426	C	1	H	2	A	109.5	2.595	2.595		2.595	37.2	36.1	35.2	33.5335	0.485814	2.07003	-	XXXX	U1426C-1H-2A, 109.5cm		1
346	U1426	C	1	H	2	A	110	2.6	2.6		2.6	37	35.9	34.9	33.4101	0.458174	2.15741	-	XXXX	U1426C-1H-2A, 110.0cm		1
346	U1426	C	1	H	2	A	110.5	2.605	2.605		2.605	37.7	36.6	35.6	33.8261	0.453832	2.14437	-	XXXX	U1426C-1H-2A, 110.5cm		1
346	U1426	C	1	H	2	A	111	2.61	2.61		2.61	37.4	36.2	35.2	33.6019	0.513846	2.17215	-	XXXX	U1426C-1H-2A, 111.0cm		1
346	U1426	C	1	H	2	A	111.5	2.615	2.615		2.615	37	35.9	34.9	33.4101	0.458174	2.15741	-	XXXX	U1426C-1H-2A, 111.5cm		1
346	U1426	C	1	H	2	A	112	2.62	2.62		2.62	37.3	36.1	35.2	33.5465	0.543413	2.09042	-	XXXX	U1426C-1H-2A, 112.0cm		1
346	U1426	C	1	H	2	A	112.5	2.625	2.625		2.625	37.3	36.2	35.2	33.5889	0.456298	2.15179	-	XXXX	U1426C-1H-2A, 112.5cm		1
346	U1426	C	1	H	2	A	113	2.63	2.63		2.63	37.9	36.9	36.1	33.9985	0.452263	1.95365	-	XXXX	U1426C-1H-2A, 113.0cm		1
346	U1426	C	1	H	2	A	113.5	2.635	2.635		2.635	39.2	38.2	37.1	34.7441	0.36042	2.17692	-	XXXX	U1426C-1H-2A, 113.5cm		1
346	U1426	C	1	H	2	A	114	2.64	2.64		2.64	39.8	38.9	37.4	35.118	0.190629	2.46667	-	XXXX	U1426C-1H-2A, 114.0cm		1
346	U1426	C	1	H	2	A	114.5	2.645	2.645		2.645	39.7	38.6	37.1	34.9709	0.302686	2.5127	-	XXXX	U1426C-1H-2A, 114.5cm		1
346	U1426	C	1	H	2	A	115	2.65	2.65		2.65	39.4	38.3	36.9	34.8023	0.331798	2.43835	-	XXXX	U1426C-1H-2A, 115.0cm		1
346	U1426	C	1	H	2	A	115.5	2.655	2.655		2.655	39.6	38.5	37.1	34.9175	0.33096	2.43388	-	XXXX	U1426C-1H-2A, 115.5cm		1
346	U1426	C	1	H	2	A	116	2.66	2.66		2.66	40.9	40	38.2	35.7305	0.106172	2.68104	-	XXXX	U1426C-1H-2A, 116.0cm		1
346	U1426	C	1	H	2	A	116.5	2.665	2.665		2.665	40.9	40	38.4	35.7383	0.160957	2.52171	-	XXXX	U1426C-1H-2A, 116.5cm		1
346	U1426	C	1	H	2	A	117	2.67	2.67		2.67	41	40.2	38.6	35.8386	0.106112	2.49797	-	XXXX	U1426C-1H-2A, 117.0cm		1
346	U1426	C	1	H	2	A	117.5	2.675	2.675		2.675	40.9	40.1	38.4	35.7784	0.0788036	2.57973	-	XXXX	U1426C-1H-2A, 117.5cm		1
346	U1426	C	1	H	2	A	118	2.68	2.68		2.68	40.4	39.8	38.3	35.5927	0.0242678	2.38882	-	XXXX	U1426C-1H-2A, 118.0cm		1
346	U1426	C	1	H	2	A	118.5	2.685	2.685		2.685	39.8	39.2	37.7	35.2521	0.024048	2.40164	-	XXXX	U1426C-1H-2A, 118.5cm		1
346	U1426	C	1	H	2	A	119	2.69	2.69		2.69	39.3	38.4	37.2	34.8429	0.275731	2.23452	-	XXXX	U1426C-1H-2A, 119.0cm		1
346	U1426	C	1	H	2	A	119.5	2.695	2.695		2.695	40.4	39.7	38.2	35.5484	0.0791848	2.41022	-	XXXX	U1426C-1H-2A, 119.5cm		1
346	U1426	C	1	H	2	A	120	2.7	2.7		2.7	42.4	41.4	39.4	36.5157	0.104775	2.82173	-	XXXX	U1426C-1H-2A, 120.0cm		1
346	U1426	C	1	H	2	A	120.5	2.705	2.705		2.705	41.2	39.9	38.3	35.7309	0.379734	2.60099	-	XXXX	U1426C-1H-2A, 120.5cm		1
346	U1426	C	1	H	2	A	121	2.71	2.71		2.71	41.3	40.1	38.5	35.8312	0.324334	2.57697	-	XXXX	U1426C-1H-2A, 121.0cm		1
346	U1426	C	1	H	2	A	121.5	2.715	2.715		2.715	42.4	41.2	39.5	36.4406	0.293122	2.62949	-	XXXX	U1426C-1H-2A, 121.5cm		1
346	U1426	C	1	H	2	A	122	2.72	2.72		2.72	42.5	41.3	39.3	36.4844	0.212288	2.86213	-	XXXX	U1426C-1H-2A, 122.0cm		1
346	U1426	C	1	H	2	A	122.5	2.725	2.725		2.725	42.1	40.9	38.9	36.2627	0.213297	2.87314	-	XXXX	U1426C-1H-2A, 122.5cm		1
346	U1426	C	1	H	2	A	123	2.73	2.73		2.73	41.9	40.8	38.8	36.195	0.159483	2.85691	-	XXXX	U1426C-1H-2A, 123.0cm		1
346	U1426	C	1	H	2	A	123.5	2.735	2.735		2.735	41.5	40.4	38.6	35.9794	0.214529	2.70917	-	XXXX	U1426C-1H-2A, 123.5cm		1
346	U1426	C	1	H	2	A	124	2.74	2.74		2.74	42	40.9	39.2	36.2622	0.240294	2.61779	-	XXXX	U1426C-1H-2A, 124.0cm		1
346	U1426	C	1	H	2	A	124.5	2.745	2.745		2.745	42.4	41.4	39.7	36.5272	0.185352	2.587	-	XXXX	U1426C-1H-2A, 124.5cm		1
346	U1426	C	1	H	2	A	125	2.75	2.75		2.75	41.8	40.7	38.9	36.147	0.213782	2.70153	-	XXXX	U1426C-1H-2A, 125.0cm		1
346	U1426	C	1	H	2	A	125.5	2.755	2.755		2.755	41.4	40.3	38.5	35.9234	0.214779	2.71173	-	XXXX	U1426C-1H-2A, 125.5cm		1
346	U1426	C	1	H	2	A	126	2.76	2.76		2.76	39.9	38.6	36.9	34.988	0.358405	2.71435	-	XXXX	U1426C-1H-2A, 126.0cm		1
346	U1426	C	1	H	2	A	126.5	2.765	2.765		2.765	40	38.8	37.3	35.098	0.357417	2.5276	-	XXXX	U1426C-1H-2A, 126.5cm		1
346	U1426	C	1	H	2	A	127	2.77	2.77		2.77	41.3	40.1	38.2	35.8195	0.242587	2.81576	-	XXXX	U1426C-1H-2A, 127.0cm		1
346	U1426	C	1	H	2	A	127.5	2.775	2.775		2.775	41.1	39.8	37.8	35.6589	0.270953	2.92339	-	XXXX	U1426C-1H-2A, 127.5cm		1
346	U1426	C	1	H	2	A	128	2.78	2.78		2.78	41.1	39.9	38	35.7069	0.243181	2.82122	-	XXXX	U1426C-1H-2A, 128.0cm		1
346	U1426	C	1	H	2	A	128.5	2.785	2.785		2.785	38.7	37.1	35.3	34.152	0.508093	2.89846	-	XXXX	U1426C-1H-2A, 128.5cm		1
346	U1426	C	1	H	2	A	129	2.79	2.79		2.79	36.6	34.5	32.6	32.6596	0.794678	3.17193	-	XXXX	U1426C-1H-2A, 129.0cm		1
346	U1426	C	1	H	2	A	129.5	2.795	2.795		2.795	37.4	35.3	33.1	33.1316	0.6987	3.40161	-	XXXX	U1426C-1H-2A, 129.5cm		1
346	U1426	C	1	H	2	A	130	2.8	2.8		2.8	40.1	38.6	36.9	35.013	0.469646	2.75361	-	XXXX	U1426C-1H-2A, 130.0cm		1
346	U1426	C	1	H	2	A	130.5	2.805	2.805		2.805	38.2	36.1	34.1	33.6182	0.746877	3.20059	-	XXXX	U1426C-1H-2A, 130.5cm		1
346	U1426	C	1	H	2	A	131	2.81	2.81		2.81	40.6	38.9	36.8	35.1937	0.468377	3.10929	-	XXXX	U1426C-1H-2A, 131.0cm		1
346	U1426	C	1	H	2	A	131.5	2.815	2.815		2.815	38.6	36.4	33.9	33.7888	0.659798	3.63422	-	XXXX	U1426C-1H-2A, 131.5cm		1
346	U1426	C	1	H	2	A	132	2.82	2.82		2.82	38.3	36.3	33.6	33.6955	0.489022	3.7684	-	XXXX	U1426C-1H-2A, 132.0cm		1
346	U1426	C	1	H	2	A	132.5	2.825	2.825		2.825	38.4	36.4	33.8	33.7588	0.516502	3.6787	-	XXXX	U1426C-1H-2A, 132.5cm		1
346	U1426	C	1	H	2	A	133	2.83	2.83		2.83	36.8	34.7	32.5	32.7687	0.705331	3.42551	-	XXXX	U1426C-1H-2A, 133.0cm		1
346	U1426	C	1	H	2	A	133.5	2.835	2.835		2.835	37	35	32.9	32.9415	0.672111	3.30608	-	XXXX	U1426C-1H-2A, 133.5cm		1
346	U1426	C	1	H	2	A	134	2.84	2.84		2.84	37.2	35.1	32.8	33.0069	0.672131	3.49612	-	XXXX	U1426C-1H-2A, 134.0cm		1
346	U1426	C	1	H	2	A	134.5	2.845	2.845		2.845	37.8	35.8	33.4	33.41	0.578303	3.53293	-	XXXX	U1426C-1H-2A, 134.5cm		1
346	U1426	C	1	H	2	A	135	2.85	2.85		2.85	38.2	36.2	33.8	33.6483	0.574758	3.51661	-	XXXX	U1426C-1H-2A, 135.0cm		1
346	U1426	C	1	H	2	A	135.5	2.855	2.855		2.855	37.3	35.3	32.8	33.106	0.554127	3.64025	-	XXXX	U1426C-1H-2A, 135.5cm		1
346	U1426	C	1	H	2	A	136	2.86	2.86		2.86	37.2	35.2	32.9	33.054	0.612488	3.47129	-	XXXX	U1426C-1H-2A, 136.0cm		1
346	U1426	C	1	H	2	A	136.5	2.865	2.865		2.865	37.8	35.9	33.6	33.4608	0.547903	3.42275	-	XXXX	U1426C-1H-2A, 136.5cm		1
346	U1426	C	1	H	2	A	137	2.87	2.87		2.87	37.7	35.8	33.6	33.4052	0.5773	3.34108	-	XXXX	U1426C-1H-2A, 137.0cm		1
346	U1426	C	1	H	2	A	137.5	2.875	2.875		2.875	39.4	37.7	35.5	34.4988	0.448426	3.23162	-	XXXX	U1426C-1H-2A, 137.5cm		1
346	U1426	C	1	H	2	A	138	2.88	2.88		2.88	38.4	36.3	33.4	33.7004	0.490302	3.95992	-	XXXX	U1426C-1H-2A, 138.0cm		1
346	U1426	C	1	H	2	A	138.5	2.885	2.885		2.885	35.4	33	30.4	31.7455	0.78904	3.92106	-	XXXX	U1426C-1H-2A, 138.5cm		1
346	U1426	C	1	H	2	A	139	2.89	2.89		2.89	36.6	34.3	31.7	32.535	0.71258	3.83578	-	XXXX	U1426C-1H-2A, 139.0cm		1
346	U1426	C	1	H	2	A	139.5	2.895	2.895		2.895	37.3	35.2	32.7	33.059	0.61367	3.66531	-	XXXX	U1426C-1H-2A, 139.5cm		1
346	U1426	C	1	H	2	A	140	2.9	2.9		2.9	39.2	37.6	35.5	34.4319	0.420504	3.13211	-	XXXX	U1426C-1H-2A, 140.0cm		1
346	U1426	C	1	H	2	A	140.5	2.905	2.905		2.905	37.5	35.7	33.7	33.3405	0.577324	3.15321	-	XXXX	U1426C-1H-2A, 140.5cm		1
346	U1426	C	1	H	2	A	141	2.91	2.91		2.91	35.7	33.5	31.1	32.0376	0.720546	3.67455	-	XXXX	U1426C-1H-2A, 141.0cm		1
346	U1426	C	1	H	2	A	141.5	2.915	2.915		2.915	36.4	34.3	31.9	32.5165	0.651677	3.61746	-	XXXX	U1426C-1H-2A, 141.5cm		1
346	U1426	C	1	H	2	A	142	2.92	2.92		2.92	36.5	34.3	31.8	32.5258	0.682105	3.72655	-	XXXX	U1426C-1H-2A, 142.0cm		1
346	U1426	C	1	H	2	A	142.5	2.925	2.925		2.925	36.1	34	31.4	32.3242	0.596487	3.80789	-	XXXX	U1426C-1H-2A, 142.5cm		1
346	U1426	C	1	H	2	A	143	2.93	2.93		2.93	36.1	33.9	31.6	32.2888	0.745003	3.56785	-	XXXX	U1426C-1H-2A, 143.0cm		1
346	U1426	C	1	H	2	A	143.5	2.935	2.935		2.935	36.5	34.4	32.1	32.5818	0.679662	3.52531	-	XXXX	U1426C-1H-2A, 143.5cm		1
346	U1426	C	1	H	2	A	144	2.94	2.94		2.94	35.9	33.8	31.5	32.2136	0.686311	3.55099	-	XXXX	U1426C-1H-2A, 144.0cm		1
346	U1426	C	1	H	2	A	144.5	2.945	2.945		2.945	36.2	34.2	32.5	32.4713	0.797545	2.98709	-	XXXX	U1426C-1H-2A, 144.5cm		1
346	U1426	C	1	H	2	A	145	2.95	2.95		2.95	35.7	33.5	31.4	32.0503	0.808724	3.40751	-	XXXX	U1426C-1H-2A, 145.0cm		1
346	U1426	C	1	H	2	A	145.5	2.955	2.955		2.955	36.1	34.2	32.6	32.4621	0.767483	2.87887	-	XXXX	U1426C-1H-2A, 145.5cm		1
346	U1426	C	1	H	2	A	146	2.96	2.96		2.96	35.8	33.9	32.4	32.282	0.800555	2.8009	-	XXXX	U1426C-1H-2A, 146.0cm		1
346	U1426	C	1	H	2	A	146.5	2.965	2.965		2.965	36.1	34.1	32.5	32.4142	0.828101	2.90313	-	XXXX	U1426C-1H-2A, 146.5cm		1
346	U1426	C	1	H	2	A	147	2.97	2.97		2.97	35.9	33.9	32	32.2786	0.742628	3.17271	-	XXXX	U1426C-1H-2A, 147.0cm		1
346	U1426	C	1	H	2	A	147.5	2.975	2.975		2.975	36.5	34.4	32.7	32.607	0.854145	3.00147	-	XXXX	U1426C-1H-2A, 147.5cm		1
346	U1426	C	1	H	2	A	148	2.98	2.98		2.98	36.5	34.3	32.3	32.5467	0.827357	3.28763	-	XXXX	U1426C-1H-2A, 148.0cm		1
346	U1426	C	1	H	2	A	148.5	2.985	2.985		2.985	35.4	33.3	31.1	31.9083	0.72152	3.48355	-	XXXX	U1426C-1H-2A, 148.5cm		1
346	U1426	C	1	H	2	A	149	2.99	2.99		2.99	32.4	30.5	28.6	30.1093	0.72308	3.28417	-	XXXX	U1426C-1H-2A, 149.0cm		1
346	U1426	C	1	H	2	A	149.5	2.995	2.995		2.995	18	16.7	14.7	19.4499	0.424338	4.11538	-	XXXX	U1426C-1H-2A, 149.5cm		1
346	U1426	C	1	H	3	A	0	3	3		3	30.2	28.4	26.9	28.7137	0.814215	2.96458	-	XXXX	U1426C-1H-3A, 0.0cm	sub_sample_width 1.5 cm, median_filter_rank 0, data_decimate 100	1
346	U1426	C	1	H	3	A	0.5	3.005	3.005		3.005	37	34.9	33	32.9025	0.789697	3.15757	-	XXXX	U1426C-1H-3A, 0.5cm		1
346	U1426	C	1	H	3	A	1	3.01	3.01		3.01	37.2	34.9	32.2	32.896	0.67694	3.89491	-	XXXX	U1426C-1H-3A, 1.0cm		1
346	U1426	C	1	H	3	A	1.5	3.015	3.015		3.015	35.6	33.5	31.3	32.0324	0.719143	3.47505	-	XXXX	U1426C-1H-3A, 1.5cm		1
346	U1426	C	1	H	3	A	2	3.02	3.02		3.02	35.3	33.2	31.1	31.8503	0.752299	3.39847	-	XXXX	U1426C-1H-3A, 2.0cm		1
346	U1426	C	1	H	3	A	2.5	3.025	3.025		3.025	35.2	33.1	31	31.788	0.753546	3.40261	-	XXXX	U1426C-1H-3A, 2.5cm		1
346	U1426	C	1	H	3	A	3	3.03	3.03		3.03	36	33.9	31.8	32.2837	0.74373	3.37001	-	XXXX	U1426C-1H-3A, 3.0cm		1
346	U1426	C	1	H	3	A	3.5	3.035	3.035		3.035	36.7	34.7	32.7	32.7637	0.704274	3.23062	-	XXXX	U1426C-1H-3A, 3.5cm		1
346	U1426	C	1	H	3	A	4	3.04	3.04		3.04	36.6	34.5	32.5	32.6554	0.765634	3.25902	-	XXXX	U1426C-1H-3A, 4.0cm		1
346	U1426	C	1	H	3	A	4.5	3.045	3.045		3.045	36.4	34.5	32.6	32.6328	0.676438	3.13	-	XXXX	U1426C-1H-3A, 4.5cm		1
346	U1426	C	1	H	3	A	5	3.05	3.05		3.05	36.8	34.9	33	32.876	0.672233	3.11591	-	XXXX	U1426C-1H-3A, 5.0cm		1
346	U1426	C	1	H	3	A	5.5	3.055	3.055		3.055	37	35.1	33.3	33.0011	0.699047	3.02286	-	XXXX	U1426C-1H-3A, 5.5cm		1
346	U1426	C	1	H	3	A	6	3.06	3.06		3.06	36.8	34.9	33	32.876	0.672233	3.11591	-	XXXX	U1426C-1H-3A, 6.0cm		1
346	U1426	C	1	H	3	A	6.5	3.065	3.065		3.065	36.7	34.8	32.9	32.8153	0.673277	3.11941	-	XXXX	U1426C-1H-3A, 6.5cm		1
346	U1426	C	1	H	3	A	7	3.07	3.07		3.07	36.5	34.5	32.5	32.642	0.706496	3.23805	-	XXXX	U1426C-1H-3A, 7.0cm		1
346	U1426	C	1	H	3	A	7.5	3.075	3.075		3.075	36.2	34.2	32.2	32.4586	0.709867	3.24931	-	XXXX	U1426C-1H-3A, 7.5cm		1
346	U1426	C	1	H	3	A	8	3.08	3.08		3.08	36.1	34.1	32.2	32.4015	0.740258	3.1654	-	XXXX	U1426C-1H-3A, 8.0cm		1
346	U1426	C	1	H	3	A	8.5	3.085	3.085		3.085	36.4	34.5	32.4	32.6245	0.618191	3.30432	-	XXXX	U1426C-1H-3A, 8.5cm		1
346	U1426	C	1	H	3	A	9	3.09	3.09		3.09	36.4	34.5	32.3	32.6203	0.589086	3.39167	-	XXXX	U1426C-1H-3A, 9.0cm		1
346	U1426	C	1	H	3	A	9.5	3.095	3.095		3.095	37.4	35.4	33.1	33.1744	0.610579	3.4632	-	XXXX	U1426C-1H-3A, 9.5cm		1
346	U1426	C	1	H	3	A	10	3.1	3.1		3.1	37.5	35.5	33.3	33.2386	0.638268	3.37315	-	XXXX	U1426C-1H-3A, 10.0cm		1
346	U1426	C	1	H	3	A	10.5	3.105	3.105		3.105	37.5	35.6	33.7	33.2978	0.665051	3.09178	-	XXXX	U1426C-1H-3A, 10.5cm		1
346	U1426	C	1	H	3	A	11	3.11	3.11		3.11	36.8	34.9	32.9	32.8718	0.643273	3.20242	-	XXXX	U1426C-1H-3A, 11.0cm		1
346	U1426	C	1	H	3	A	11.5	3.115	3.115		3.115	36.3	34.4	32.4	32.5676	0.648329	3.22079	-	XXXX	U1426C-1H-3A, 11.5cm		1
346	U1426	C	1	H	3	A	12	3.12	3.12		3.12	36.6	34.5	32.3	32.647	0.70758	3.4336	-	XXXX	U1426C-1H-3A, 12.0cm		1
346	U1426	C	1	H	3	A	12.5	3.125	3.125		3.125	37.2	35.2	33	33.0581	0.641248	3.38483	-	XXXX	U1426C-1H-3A, 12.5cm		1
346	U1426	C	1	H	3	A	13	3.13	3.13		3.13	36.9	34.8	32.6	32.8295	0.704213	3.42149	-	XXXX	U1426C-1H-3A, 13.0cm		1
346	U1426	C	1	H	3	A	13.5	3.135	3.135		3.135	37.4	35.5	33.5	33.2337	0.637351	3.18084	-	XXXX	U1426C-1H-3A, 13.5cm		1
346	U1426	C	1	H	3	A	14	3.14	3.14		3.14	38.3	36.3	34	33.7117	0.602189	3.42754	-	XXXX	U1426C-1H-3A, 14.0cm		1
346	U1426	C	1	H	3	A	14.5	3.145	3.145		3.145	38.1	36.1	33.6	33.5848	0.547262	3.6061	-	XXXX	U1426C-1H-3A, 14.5cm		1
346	U1426	C	1	H	3	A	15	3.15	3.15		3.15	38.5	36.6	34.2	33.8722	0.513899	3.48029	-	XXXX	U1426C-1H-3A, 15.0cm		1
346	U1426	C	1	H	3	A	15.5	3.155	3.155		3.155	38.3	36.3	33.7	33.6995	0.517297	3.683	-	XXXX	U1426C-1H-3A, 15.5cm		1
346	U1426	C	1	H	3	A	16	3.16	3.16		3.16	38.5	36.5	33.7	33.8098	0.459327	3.84478	-	XXXX	U1426C-1H-3A, 16.0cm		1
346	U1426	C	1	H	3	A	16.5	3.165	3.165		3.165	37.8	35.7	32.9	33.347	0.523444	3.90233	-	XXXX	U1426C-1H-3A, 16.5cm		1
346	U1426	C	1	H	3	A	17	3.17	3.17		3.17	38.4	36.3	33.4	33.7004	0.490302	3.95992	-	XXXX	U1426C-1H-3A, 17.0cm		1
346	U1426	C	1	H	3	A	17.5	3.175	3.175		3.175	38.4	36.4	33.7	33.7547	0.488266	3.76396	-	XXXX	U1426C-1H-3A, 17.5cm		1
346	U1426	C	1	H	3	A	18	3.18	3.18		3.18	38.4	36.3	33.6	33.7085	0.546739	3.78876	-	XXXX	U1426C-1H-3A, 18.0cm		1
346	U1426	C	1	H	3	A	18.5	3.185	3.185		3.185	38.8	36.7	33.9	33.9408	0.5153	3.85593	-	XXXX	U1426C-1H-3A, 18.5cm		1
346	U1426	C	1	H	3	A	19	3.19	3.19		3.19	39.1	37	34.1	34.1132	0.484979	3.92704	-	XXXX	U1426C-1H-3A, 19.0cm		1
346	U1426	C	1	H	3	A	19.5	3.195	3.195		3.195	39	36.9	34.1	34.0585	0.513713	3.84687	-	XXXX	U1426C-1H-3A, 19.5cm		1
346	U1426	C	1	H	3	A	20	3.2	3.2		3.2	38.9	36.8	34	33.9997	0.514505	3.85139	-	XXXX	U1426C-1H-3A, 20.0cm		1
346	U1426	C	1	H	3	A	20.5	3.205	3.205		3.205	38.4	36.2	33.3	33.654	0.548917	3.98508	-	XXXX	U1426C-1H-3A, 20.5cm		1
346	U1426	C	1	H	3	A	21	3.21	3.21		3.21	38.3	36.2	33.2	33.637	0.462835	4.0506	-	XXXX	U1426C-1H-3A, 21.0cm		1
346	U1426	C	1	H	3	A	21.5	3.215	3.215		3.215	38.5	36.3	33.5	33.7174	0.576225	3.89464	-	XXXX	U1426C-1H-3A, 21.5cm		1
346	U1426	C	1	H	3	A	22	3.22	3.22		3.22	38.8	36.7	34.3	33.957	0.627648	3.51679	-	XXXX	U1426C-1H-3A, 22.0cm		1
346	U1426	C	1	H	3	A	22.5	3.225	3.225		3.225	38.4	36.2	33.3	33.654	0.548917	3.98508	-	XXXX	U1426C-1H-3A, 22.5cm		1
346	U1426	C	1	H	3	A	23	3.23	3.23		3.23	38.7	36.5	33.4	33.8237	0.490171	4.14182	-	XXXX	U1426C-1H-3A, 23.0cm		1
346	U1426	C	1	H	3	A	23.5	3.235	3.235		3.235	38.9	36.7	33.6	33.9417	0.488618	4.13179	-	XXXX	U1426C-1H-3A, 23.5cm		1
346	U1426	C	1	H	3	A	24	3.24	3.24		3.24	38.8	36.5	33.5	33.8407	0.575804	4.07651	-	XXXX	U1426C-1H-3A, 24.0cm		1
346	U1426	C	1	H	3	A	24.5	3.245	3.245		3.245	38.6	36.3	33.3	33.7223	0.57763	4.08641	-	XXXX	U1426C-1H-3A, 24.5cm		1
346	U1426	C	1	H	3	A	25	3.25	3.25		3.25	38.1	35.8	32.9	33.429	0.610583	4.02501	-	XXXX	U1426C-1H-3A, 25.0cm		1
346	U1426	C	1	H	3	A	25.5	3.255	3.255		3.255	38	35.8	32.9	33.4158	0.552418	4.00449	-	XXXX	U1426C-1H-3A, 25.5cm		1
346	U1426	C	1	H	3	A	26	3.26	3.26		3.26	38.5	36.2	33.2	33.663	0.578549	4.09138	-	XXXX	U1426C-1H-3A, 26.0cm		1
346	U1426	C	1	H	3	A	26.5	3.265	3.265		3.265	38.4	36.2	33.2	33.65	0.520716	4.07099	-	XXXX	U1426C-1H-3A, 26.5cm		1
346	U1426	C	1	H	3	A	27	3.27	3.27		3.27	38.8	36.5	33.4	33.8366	0.547769	4.16212	-	XXXX	U1426C-1H-3A, 27.0cm		1
346	U1426	C	1	H	3	A	27.5	3.275	3.275		3.275	38	35.7	32.9	33.3733	0.63993	3.94345	-	XXXX	U1426C-1H-3A, 27.5cm		1
346	U1426	C	1	H	3	A	28	3.28	3.28		3.28	38.6	36.3	33.4	33.7264	0.605753	4.00064	-	XXXX	U1426C-1H-3A, 28.0cm		1
346	U1426	C	1	H	3	A	28.5	3.285	3.285		3.285	39.6	37.5	34.7	34.4094	0.509034	3.82007	-	XXXX	U1426C-1H-3A, 28.5cm		1
346	U1426	C	1	H	3	A	29	3.29	3.29		3.29	37.9	35.5	32.4	33.2544	0.615155	4.23446	-	XXXX	U1426C-1H-3A, 29.0cm		1
346	U1426	C	1	H	3	A	29.5	3.295	3.295		3.295	39	36.8	33.6	33.9966	0.459898	4.21211	-	XXXX	U1426C-1H-3A, 29.5cm		1
346	U1426	C	1	H	3	A	30	3.3	3.3		3.3	39.7	37.4	33.9	34.3489	0.429396	4.45595	-	XXXX	U1426C-1H-3A, 30.0cm		1
346	U1426	C	1	H	3	A	30.5	3.305	3.305		3.305	39.2	37	33.7	34.1101	0.430577	4.28707	-	XXXX	U1426C-1H-3A, 30.5cm		1
346	U1426	C	1	H	3	A	31	3.31	3.31		3.31	39.2	37	33.7	34.1101	0.430577	4.28707	-	XXXX	U1426C-1H-3A, 31.0cm		1
346	U1426	C	1	H	3	A	31.5	3.315	3.315		3.315	37.5	35.1	31.9	33.0096	0.590687	4.34364	-	XXXX	U1426C-1H-3A, 31.5cm		1
346	U1426	C	1	H	3	A	32	3.32	3.32		3.32	40.2	38.4	34.7	34.8569	0.086884	4.47147	-	XXXX	U1426C-1H-3A, 32.0cm		1
346	U1426	C	1	H	3	A	32.5	3.325	3.325		3.325	42.5	41.3	38	36.4349	-0.135559	3.89099	-	XXXX	U1426C-1H-3A, 32.5cm		1
346	U1426	C	1	H	3	A	33	3.33	3.33		3.33	43.1	42.1	39	36.8589	-0.188147	3.66295	-	XXXX	U1426C-1H-3A, 33.0cm		1
346	U1426	C	1	H	3	A	33.5	3.335	3.335		3.335	43.3	42.2	39	36.9218	-0.160927	3.75639	-	XXXX	U1426C-1H-3A, 33.5cm		1
346	U1426	C	1	H	3	A	34	3.34	3.34		3.34	44.1	43	40.2	37.3718	-0.0543641	3.4148	-	XXXX	U1426C-1H-3A, 34.0cm		1
346	U1426	C	1	H	3	A	34.5	3.345	3.345		3.345	43.5	42.3	39	36.9846	-0.133756	3.84967	-	XXXX	U1426C-1H-3A, 34.5cm		1
346	U1426	C	1	H	3	A	35	3.35	3.35		3.35	42.9	41.5	38.2	36.5694	-0.0273813	3.92023	-	XXXX	U1426C-1H-3A, 35.0cm		1
346	U1426	C	1	H	3	A	35.5	3.355	3.355		3.355	41.5	39.9	36.7	35.7056	0.109323	3.94679	-	XXXX	U1426C-1H-3A, 35.5cm		1
346	U1426	C	1	H	3	A	36	3.36	3.36		3.36	41.1	39.4	36.4	35.443	0.219932	3.82465	-	XXXX	U1426C-1H-3A, 36.0cm		1
346	U1426	C	1	H	3	A	36.5	3.365	3.365		3.365	41.1	39.5	36.7	35.4951	0.218803	3.63802	-	XXXX	U1426C-1H-3A, 36.5cm		1
346	U1426	C	1	H	3	A	37	3.37	3.37		3.37	40.3	38.6	36	35.0024	0.33256	3.5291	-	XXXX	U1426C-1H-3A, 37.0cm		1
346	U1426	C	1	H	3	A	37.5	3.375	3.375		3.375	39.9	38.3	35.5	34.8095	0.222565	3.68664	-	XXXX	U1426C-1H-3A, 37.5cm		1
346	U1426	C	1	H	3	A	38	3.38	3.38		3.38	39.3	37.6	35	34.4247	0.337393	3.56852	-	XXXX	U1426C-1H-3A, 38.0cm		1
346	U1426	C	1	H	3	A	38.5	3.385	3.385		3.385	38.6	36.7	34.1	33.9231	0.456776	3.64567	-	XXXX	U1426C-1H-3A, 38.5cm		1
346	U1426	C	1	H	3	A	39	3.39	3.39		3.39	38.6	36.6	33.9	33.873	0.486763	3.75513	-	XXXX	U1426C-1H-3A, 39.0cm		1
346	U1426	C	1	H	3	A	39.5	3.395	3.395		3.395	38.6	36.6	34	33.877	0.514922	3.67015	-	XXXX	U1426C-1H-3A, 39.5cm		1
346	U1426	C	1	H	3	A	40	3.4	3.4		3.4	39.2	37.1	34.3	34.1758	0.51214	3.83787	-	XXXX	U1426C-1H-3A, 40.0cm		1
346	U1426	C	1	H	3	A	40.5	3.405	3.405		3.405	38.8	36.6	33.7	33.8908	0.545477	3.96598	-	XXXX	U1426C-1H-3A, 40.5cm		1
346	U1426	C	1	H	3	A	41	3.41	3.41		3.41	38.6	36.3	33.3	33.7223	0.57763	4.08641	-	XXXX	U1426C-1H-3A, 41.0cm		1
346	U1426	C	1	H	3	A	41.5	3.415	3.415		3.415	38.6	36.4	33.3	33.7645	0.490953	4.14687	-	XXXX	U1426C-1H-3A, 41.5cm		1
346	U1426	C	1	H	3	A	42	3.42	3.42		3.42	39.2	37	33.9	34.1181	0.486314	4.11688	-	XXXX	U1426C-1H-3A, 42.0cm		1
346	U1426	C	1	H	3	A	42.5	3.425	3.425		3.425	39.7	37.5	34.5	34.4142	0.51024	4.00817	-	XXXX	U1426C-1H-3A, 42.5cm		1
346	U1426	C	1	H	3	A	43	3.43	3.43		3.43	39.4	37.3	34.4	34.2888	0.482747	3.91321	-	XXXX	U1426C-1H-3A, 43.0cm		1
346	U1426	C	1	H	3	A	43.5	3.435	3.435		3.435	38.8	36.6	33.5	33.8827	0.489393	4.1368	-	XXXX	U1426C-1H-3A, 43.5cm		1
346	U1426	C	1	H	3	A	44	3.44	3.44		3.44	38.8	36.6	33.4	33.8787	0.461368	4.22239	-	XXXX	U1426C-1H-3A, 44.0cm		1
346	U1426	C	1	H	3	A	44.5	3.445	3.445		3.445	38.8	36.5	33.5	33.8407	0.575804	4.07651	-	XXXX	U1426C-1H-3A, 44.5cm		1
346	U1426	C	1	H	3	A	45	3.45	3.45		3.45	40.1	37.9	34.7	34.6385	0.452035	4.15699	-	XXXX	U1426C-1H-3A, 45.0cm		1
346	U1426	C	1	H	3	A	45.5	3.455	3.455		3.455	40.8	38.8	35.9	35.1427	0.416385	3.82675	-	XXXX	U1426C-1H-3A, 45.5cm		1
346	U1426	C	1	H	3	A	46	3.46	3.46		3.46	41	39.1	35.8	35.2857	0.250233	4.1233	-	XXXX	U1426C-1H-3A, 46.0cm		1
346	U1426	C	1	H	3	A	46.5	3.465	3.465		3.465	41.1	39	35.8	35.2576	0.389018	4.08457	-	XXXX	U1426C-1H-3A, 46.5cm		1
346	U1426	C	1	H	3	A	47	3.47	3.47		3.47	41.1	39.1	35.9	35.3021	0.332962	4.0604	-	XXXX	U1426C-1H-3A, 47.0cm		1
346	U1426	C	1	H	3	A	47.5	3.475	3.475		3.475	40.7	38.6	35.4	35.029	0.391375	4.10344	-	XXXX	U1426C-1H-3A, 47.5cm		1
346	U1426	C	1	H	3	A	48	3.48	3.48		3.48	40.7	38.6	35.4	35.029	0.391375	4.10344	-	XXXX	U1426C-1H-3A, 48.0cm		1
346	U1426	C	1	H	3	A	48.5	3.485	3.485		3.485	39.8	37.7	34.5	34.5098	0.396824	4.14693	-	XXXX	U1426C-1H-3A, 48.5cm		1
346	U1426	C	1	H	3	A	49	3.49	3.49		3.49	40.2	38	35	34.7042	0.506364	3.98483	-	XXXX	U1426C-1H-3A, 49.0cm		1
346	U1426	C	1	H	3	A	49.5	3.495	3.495		3.495	40.1	38	34.8	34.6836	0.394984	4.13227	-	XXXX	U1426C-1H-3A, 49.5cm		1
346	U1426	C	1	H	3	A	50	3.5	3.5		3.5	39.5	37.2	34.2	34.252	0.569537	4.04247	-	XXXX	U1426C-1H-3A, 50.0cm		1
346	U1426	C	1	H	3	A	50.5	3.505	3.505		3.505	39.1	36.8	33.8	34.0175	0.573095	4.06181	-	XXXX	U1426C-1H-3A, 50.5cm		1
346	U1426	C	1	H	3	A	51	3.51	3.51		3.51	39.1	36.8	33.8	34.0175	0.573095	4.06181	-	XXXX	U1426C-1H-3A, 51.0cm		1
346	U1426	C	1	H	3	A	51.5	3.515	3.515		3.515	39.3	36.9	33.7	34.0811	0.573671	4.24734	-	XXXX	U1426C-1H-3A, 51.5cm		1
346	U1426	C	1	H	3	A	52	3.52	3.52		3.52	38.7	36.2	32.7	33.6689	0.553835	4.56359	-	XXXX	U1426C-1H-3A, 52.0cm		1
346	U1426	C	1	H	3	A	52.5	3.525	3.525		3.525	39.5	37.1	33.6	34.1864	0.488648	4.49247	-	XXXX	U1426C-1H-3A, 52.5cm		1
346	U1426	C	1	H	3	A	53	3.53	3.53		3.53	38.5	36	32.7	33.5582	0.611885	4.40165	-	XXXX	U1426C-1H-3A, 53.0cm		1
346	U1426	C	1	H	3	A	53.5	3.535	3.535		3.535	40.4	37.9	34.1	34.6529	0.456724	4.72194	-	XXXX	U1426C-1H-3A, 53.5cm		1
346	U1426	C	1	H	3	A	54	3.54	3.54		3.54	39.7	37.2	33.5	34.2498	0.489619	4.67763	-	XXXX	U1426C-1H-3A, 54.0cm		1
346	U1426	C	1	H	3	A	54.5	3.545	3.545		3.545	40	37.6	33.8	34.4663	0.402176	4.7195	-	XXXX	U1426C-1H-3A, 54.5cm		1
346	U1426	C	1	H	3	A	55	3.55	3.55		3.55	39.1	36.5	32.7	33.8475	0.525175	4.82574	-	XXXX	U1426C-1H-3A, 55.0cm		1
346	U1426	C	1	H	3	A	55.5	3.555	3.555		3.555	38.4	36	32.5	33.537	0.497552	4.55472	-	XXXX	U1426C-1H-3A, 55.5cm		1
346	U1426	C	1	H	3	A	56	3.56	3.56		3.56	37.2	35.1	31.9	32.9698	0.413825	4.28137	-	XXXX	U1426C-1H-3A, 56.0cm		1
346	U1426	C	1	H	3	A	56.5	3.565	3.565		3.565	37.4	35.3	31.8	33.0782	0.326805	4.53373	-	XXXX	U1426C-1H-3A, 56.5cm		1
346	U1426	C	1	H	3	A	57	3.57	3.57		3.57	37.8	35.6	32.1	33.2718	0.38376	4.53687	-	XXXX	U1426C-1H-3A, 57.0cm		1
346	U1426	C	1	H	3	A	57.5	3.575	3.575		3.575	37.8	35.7	32.5	33.3307	0.409723	4.2491	-	XXXX	U1426C-1H-3A, 57.5cm		1
346	U1426	C	1	H	3	A	58	3.58	3.58		3.58	37.5	35.3	31.8	33.0915	0.385738	4.55441	-	XXXX	U1426C-1H-3A, 58.0cm		1
346	U1426	C	1	H	3	A	58.5	3.585	3.585		3.585	38.5	36.7	33.6	33.89	0.258492	4.05091	-	XXXX	U1426C-1H-3A, 58.5cm		1
346	U1426	C	1	H	3	A	59	3.59	3.59		3.59	38.4	36.6	33.6	33.835	0.287094	3.97032	-	XXXX	U1426C-1H-3A, 59.0cm		1
346	U1426	C	1	H	3	A	59.5	3.595	3.595		3.595	38.4	36.6	33.6	33.835	0.287094	3.97032	-	XXXX	U1426C-1H-3A, 59.5cm		1
346	U1426	C	1	H	3	A	60	3.6	3.6		3.6	38.1	36.4	33.4	33.7037	0.230115	3.95955	-	XXXX	U1426C-1H-3A, 60.0cm		1
346	U1426	C	1	H	3	A	60.5	3.605	3.605		3.605	37.4	35.5	32.4	33.1885	0.322269	4.13137	-	XXXX	U1426C-1H-3A, 60.5cm		1
346	U1426	C	1	H	3	A	61	3.61	3.61		3.61	35.7	33.5	30.1	31.9955	0.427462	4.57378	-	XXXX	U1426C-1H-3A, 61.0cm		1
346	U1426	C	1	H	3	A	61.5	3.615	3.615		3.615	36.6	34.5	31.3	32.6055	0.418045	4.31445	-	XXXX	U1426C-1H-3A, 61.5cm		1
346	U1426	C	1	H	3	A	62	3.62	3.62		3.62	36.6	34.5	31.3	32.6055	0.418045	4.31445	-	XXXX	U1426C-1H-3A, 62.0cm		1
346	U1426	C	1	H	3	A	62.5	3.625	3.625		3.625	35.3	32.9	29.4	31.6448	0.525264	4.74623	-	XXXX	U1426C-1H-3A, 62.5cm		1
346	U1426	C	1	H	3	A	63	3.63	3.63		3.63	36.5	34.3	30.6	32.476	0.334784	4.79376	-	XXXX	U1426C-1H-3A, 63.0cm		1
346	U1426	C	1	H	3	A	63.5	3.635	3.635		3.635	39.9	38	34.1	34.6308	0.0891293	4.68176	-	XXXX	U1426C-1H-3A, 63.5cm		1
346	U1426	C	1	H	3	A	64	3.64	3.64		3.64	40.8	39.2	35.8	35.3015	0.0559251	4.14258	-	XXXX	U1426C-1H-3A, 64.0cm		1
346	U1426	C	1	H	3	A	64.5	3.645	3.645		3.645	41.3	40	36.9	35.729	-0.028679	3.80357	-	XXXX	U1426C-1H-3A, 64.5cm		1
346	U1426	C	1	H	3	A	65	3.65	3.65		3.65	40.6	39.4	36.5	35.3851	-0.0297013	3.64602	-	XXXX	U1426C-1H-3A, 65.0cm		1
346	U1426	C	1	H	3	A	65.5	3.655	3.655		3.655	40.8	39.7	36.8	35.5428	-0.084781	3.61482	-	XXXX	U1426C-1H-3A, 65.5cm		1
346	U1426	C	1	H	3	A	66	3.66	3.66		3.66	40.6	39.3	36.5	35.3445	0.0531713	3.58773	-	XXXX	U1426C-1H-3A, 66.0cm		1
346	U1426	C	1	H	3	A	66.5	3.665	3.665		3.665	40.5	39.1	36.1	35.2352	0.0540642	3.77906	-	XXXX	U1426C-1H-3A, 66.5cm		1
346	U1426	C	1	H	3	A	67	3.67	3.67		3.67	41.2	39.8	36.5	35.6208	-0.027913	3.99416	-	XXXX	U1426C-1H-3A, 67.0cm		1
346	U1426	C	1	H	3	A	67.5	3.675	3.675		3.675	41.5	40	36.7	35.7458	0.027172	4.00445	-	XXXX	U1426C-1H-3A, 67.5cm		1
346	U1426	C	1	H	3	A	68	3.68	3.68		3.68	41.7	40.3	36.9	35.8983	-0.0547167	4.05299	-	XXXX	U1426C-1H-3A, 68.0cm		1
346	U1426	C	1	H	3	A	68.5	3.685	3.685		3.685	41.4	40	36.7	35.7335	-0.0278488	3.98524	-	XXXX	U1426C-1H-3A, 68.5cm		1
346	U1426	C	1	H	3	A	69	3.69	3.69		3.69	40.8	39.3	36.2	35.3576	0.082097	3.87199	-	XXXX	U1426C-1H-3A, 69.0cm		1
346	U1426	C	1	H	3	A	69.5	3.695	3.695		3.695	40	38.5	35.4	34.9002	0.0830776	3.9072	-	XXXX	U1426C-1H-3A, 69.5cm		1
346	U1426	C	1	H	3	A	70	3.7	3.7		3.7	39	37.3	34.4	34.2377	0.254896	3.83309	-	XXXX	U1426C-1H-3A, 70.0cm		1
346	U1426	C	1	H	3	A	70.5	3.705	3.705		3.705	38.7	37	34.2	34.0658	0.284159	3.76186	-	XXXX	U1426C-1H-3A, 70.5cm		1
346	U1426	C	1	H	3	A	71	3.71	3.71		3.71	39.2	37.5	34.6	34.3544	0.254128	3.82421	-	XXXX	U1426C-1H-3A, 71.0cm		1
346	U1426	C	1	H	3	A	71.5	3.715	3.715		3.715	40.1	38.6	35.6	34.9616	0.110509	3.81994	-	XXXX	U1426C-1H-3A, 71.5cm		1
346	U1426	C	1	H	3	A	72	3.72	3.72		3.72	40.9	39.6	36.7	35.5108	0.0256957	3.6574	-	XXXX	U1426C-1H-3A, 72.0cm		1
346	U1426	C	1	H	3	A	72.5	3.725	3.725		3.725	42.5	41.4	38.1	36.4782	-0.189415	3.86796	-	XXXX	U1426C-1H-3A, 72.5cm		1
346	U1426	C	1	H	3	A	73	3.73	3.73		3.73	43.3	42.2	38.9	36.918	-0.187368	3.83512	-	XXXX	U1426C-1H-3A, 73.0cm		1
346	U1426	C	1	H	3	A	73.5	3.735	3.735		3.735	44.7	43.4	39.9	37.5851	-0.131297	3.97921	-	XXXX	U1426C-1H-3A, 73.5cm		1
346	U1426	A	2	H	1	A	54	3.04	3.74		3.74007	45.4	43.9	40.3	37.8729	-0.0518948	4.07217	-	XXXX	U1426A-2H-1A, 54.0cm		2
346	U1426	A	2	H	1	A	54.5	3.045	3.745		3.74507	46.7	45.2	41.4	38.5546	-0.102026	4.17001	-	XXXX	U1426A-2H-1A, 54.5cm		2
346	U1426	A	2	H	1	A	55	3.05	3.75		3.75007	48.4	46.7	42.7	39.3514	-0.0495791	4.29174	-	XXXX	U1426A-2H-1A, 55.0cm		2
346	U1426	A	2	H	1	A	55.5	3.055	3.755		3.75507	51	48.9	44.3	40.495	0.00182575	4.70582	-	XXXX	U1426A-2H-1A, 55.5cm		2
346	U1426	A	2	H	1	A	56	3.06	3.76		3.76007	48.9	47.2	43.2	39.6086	-0.04945	4.27027	-	XXXX	U1426A-2H-1A, 56.0cm		2
346	U1426	A	2	H	1	A	56.5	3.065	3.765		3.76507	49.5	47.7	43.6	39.8719	-0.0241627	4.34033	-	XXXX	U1426A-2H-1A, 56.5cm		2
346	U1426	A	2	H	1	A	57	3.07	3.77		3.77007	49.9	48.2	43.9	40.1081	-0.122595	4.44869	-	XXXX	U1426A-2H-1A, 57.0cm		2
346	U1426	A	2	H	1	A	57.5	3.075	3.775		3.77507	50.5	48.4	44.1	40.2534	0.0749992	4.50878	-	XXXX	U1426A-2H-1A, 57.5cm		2
346	U1426	A	2	H	1	A	58	3.08	3.78		3.78007	50	47.8	43.5	39.9602	0.125464	4.5532	-	XXXX	U1426A-2H-1A, 58.0cm		2
346	U1426	A	2	H	1	A	58.5	3.085	3.785		3.78507	49	46.7	42.9	39.4258	0.301538	4.24792	-	XXXX	U1426A-2H-1A, 58.5cm		2
346	U1426	A	2	H	1	A	59	3.09	3.79		3.79007	49.7	47.1	43	39.6544	0.375852	4.5065	-	XXXX	U1426A-2H-1A, 59.0cm		2
346	U1426	A	2	H	1	A	59.5	3.095	3.795		3.79507	50	47	43.2	39.6585	0.649195	4.35798	-	XXXX	U1426A-2H-1A, 59.5cm		2
346	U1426	A	2	H	1	A	60	3.1	3.8		3.80007	49.6	46.5	43	39.4235	0.777133	4.17375	-	XXXX	U1426A-2H-1A, 60.0cm		2
346	U1426	A	2	H	1	A	60.5	3.105	3.805		3.80507	52	48.5	44.8	40.4786	0.904848	4.30705	-	XXXX	U1426A-2H-1A, 60.5cm		2
346	U1426	A	2	H	1	A	61	3.11	3.81		3.81007	55.6	51.8	48.1	42.1387	1.01079	4.22422	-	XXXX	U1426A-2H-1A, 61.0cm		2
346	U1426	A	2	H	1	A	61.5	3.115	3.815		3.81507	51.7	47.9	44.3	40.2127	1.08247	4.3113	-	XXXX	U1426A-2H-1A, 61.5cm		2
346	U1426	A	2	H	1	A	62	3.12	3.82		3.82007	54.2	50.6	47.5	41.5527	1.07077	3.81325	-	XXXX	U1426A-2H-1A, 62.0cm		2
346	U1426	A	2	H	1	A	62.5	3.125	3.825		3.82507	50	46.2	42.5	39.3409	1.08114	4.46031	-	XXXX	U1426A-2H-1A, 62.5cm		2
346	U1426	A	2	H	1	A	63	3.13	3.83		3.83007	49.6	45.8	42.2	39.1375	1.11126	4.40337	-	XXXX	U1426A-2H-1A, 63.0cm		2
346	U1426	A	2	H	1	A	63.5	3.135	3.835		3.83507	49.8	46.2	42.8	39.3288	1.05479	4.20028	-	XXXX	U1426A-2H-1A, 63.5cm		2
346	U1426	A	2	H	1	A	64	3.14	3.84		3.84007	49.2	45.7	42.6	39.0693	1.08539	3.97851	-	XXXX	U1426A-2H-1A, 64.0cm		2
346	U1426	A	2	H	1	A	64.5	3.145	3.845		3.84507	53.5	50.3	47.8	41.3827	1.0263	3.33249	-	XXXX	U1426A-2H-1A, 64.5cm		2
346	U1426	A	2	H	1	A	65	3.15	3.85		3.85007	54.2	51	49.2	41.7499	1.18312	2.82485	-	XXXX	U1426A-2H-1A, 65.0cm		2
346	U1426	A	2	H	1	A	65.5	3.155	3.855		3.85507	51.2	47.8	45.4	40.1596	1.17833	3.37101	-	XXXX	U1426A-2H-1A, 65.5cm		2
346	U1426	A	2	H	1	A	66	3.16	3.86		3.86007	49.2	45.8	43.3	39.1313	1.18237	3.50911	-	XXXX	U1426A-2H-1A, 66.0cm		2
346	U1426	A	2	H	1	A	66.5	3.165	3.865		3.86507	46.6	43.3	41.2	37.8175	1.27095	3.27167	-	XXXX	U1426A-2H-1A, 66.5cm		2
346	U1426	A	2	H	1	A	67	3.17	3.87		3.87007	44.8	41.6	40	36.9048	1.37747	2.91854	-	XXXX	U1426A-2H-1A, 67.0cm		2
346	U1426	A	2	H	1	A	67.5	3.175	3.875		3.87507	42.3	39.2	37.8	35.5658	1.42291	2.80806	-	XXXX	U1426A-2H-1A, 67.5cm		2
346	U1426	A	2	H	1	A	68	3.18	3.88		3.88007	41.4	38.6	37.3	35.1915	1.29766	2.68476	-	XXXX	U1426A-2H-1A, 68.0cm		2
346	U1426	A	2	H	1	A	68.5	3.185	3.885		3.88507	41.1	38.2	37.1	34.9831	1.41502	2.55254	-	XXXX	U1426A-2H-1A, 68.5cm		2
346	U1426	A	2	H	1	A	69	3.19	3.89		3.89007	40.3	37.4	36.2	34.5173	1.40377	2.65433	-	XXXX	U1426A-2H-1A, 69.0cm		2
346	U1426	A	2	H	1	A	69.5	3.195	3.895		3.89507	32.1	29.8	28.4	29.7299	1.14497	2.93331	-	XXXX	U1426A-2H-1A, 69.5cm		2
346	U1426	A	2	H	1	A	70	3.2	3.9		3.90007	34.7	32.7	31.9	31.58	1.08679	2.23856	-	XXXX	U1426A-2H-1A, 70.0cm		2
346	U1426	A	2	H	1	A	70.5	3.205	3.905		3.90507	25.8	24.2	23	25.7135	0.847394	2.77279	-	XXXX	U1426A-2H-1A, 70.5cm		2
346	U1426	A	2	H	1	A	71	3.21	3.91		3.91007	31.5	29.6	28.4	29.5482	0.955473	2.66042	-	XXXX	U1426A-2H-1A, 71.0cm		2
346	U1426	A	2	H	1	A	71.5	3.215	3.915		3.91507	35.1	33.1	31	31.7743	0.692947	3.38113	-	XXXX	U1426A-2H-1A, 71.5cm		2
346	U1426	A	2	H	1	A	72	3.22	3.92		3.92007	36.4	34.6	31.9	32.6471	0.383583	3.80478	-	XXXX	U1426A-2H-1A, 72.0cm		2
346	U1426	A	2	H	1	A	72.5	3.225	3.925		3.92507	37.1	35.3	32.8	33.0796	0.436837	3.59889	-	XXXX	U1426A-2H-1A, 72.5cm		2
346	U1426	A	2	H	1	A	73	3.23	3.93		3.93007	35	33.1	31.3	31.7734	0.72152	3.09197	-	XXXX	U1426A-2H-1A, 73.0cm		2
346	U1426	A	2	H	1	A	73.5	3.235	3.935		3.93507	34.4	32.4	31	31.3652	0.911389	2.77984	-	XXXX	U1426A-2H-1A, 73.5cm		2
346	U1426	A	2	H	1	A	74	3.24	3.94		3.94007	30.2	28.2	26.8	28.6122	0.981865	2.92217	-	XXXX	U1426A-2H-1A, 74.0cm		2
346	U1426	A	2	H	1	A	74.5	3.245	3.945		3.94507	27	25.3	24	26.5324	0.863984	2.85987	-	XXXX	U1426A-2H-1A, 74.5cm		2
346	U1426	A	2	H	1	A	75	3.25	3.95		3.95007	31	29.2	28.1	29.2716	0.929512	2.55504	-	XXXX	U1426A-2H-1A, 75.0cm		2
346	U1426	A	2	H	1	A	75.5	3.255	3.955		3.95507	32.8	30.7	29.6	30.304	1.09367	2.58027	-	XXXX	U1426A-2H-1A, 75.5cm		2
346	U1426	A	2	H	1	A	76	3.26	3.96		3.96007	36.9	34.5	33.1	32.7206	1.11642	2.80136	-	XXXX	U1426A-2H-1A, 76.0cm		2
346	U1426	A	2	H	1	A	76.5	3.265	3.965		3.96507	36.8	34.5	32.6	32.6863	0.912718	3.21388	-	XXXX	U1426A-2H-1A, 76.5cm		2
346	U1426	A	2	H	1	A	77	3.27	3.97		3.97007	38.5	36.4	34.3	33.792	0.71524	3.27455	-	XXXX	U1426A-2H-1A, 77.0cm		2
346	U1426	A	2	H	1	A	77.5	3.275	3.975		3.97507	34.4	32.9	30.1	31.5506	0.180729	3.91353	-	XXXX	U1426A-2H-1A, 77.5cm		2
346	U1426	A	2	H	1	A	78	3.28	3.98		3.98007	33.8	32.4	29.9	31.2344	0.210861	3.64341	-	XXXX	U1426A-2H-1A, 78.0cm		2
346	U1426	A	2	H	1	A	78.5	3.285	3.985		3.98507	31.8	30.6	28.3	30.0565	0.151621	3.49756	-	XXXX	U1426A-2H-1A, 78.5cm		2
346	U1426	A	2	H	1	A	79	3.29	3.99		3.99007	26.5	25.1	23	26.2992	0.379021	3.6283	-	XXXX	U1426A-2H-1A, 79.0cm		2
346	U1426	A	2	H	1	A	79.5	3.295	3.995		3.99507	19.6	18.6	16.9	21.1002	0.265513	3.47271	-	XXXX	U1426A-2H-1A, 79.5cm		2
346	U1426	A	2	H	1	A	80	3.3	4		4.00007	21	20.1	18	22.3291	0.0186449	3.82417	-	XXXX	U1426A-2H-1A, 80.0cm		2
346	U1426	A	2	H	1	A	80.5	3.305	4.005		4.00507	37.7	36.6	34.1	33.7649	0.0247331	3.40314	-	XXXX	U1426A-2H-1A, 80.5cm		2
346	U1426	A	2	H	1	A	81	3.31	4.01		4.01007	43.3	42.2	40.2	36.967	0.157046	2.81921	-	XXXX	U1426A-2H-1A, 81.0cm		2
346	U1426	A	2	H	1	A	81.5	3.315	4.015		4.01507	39.4	37.5	34.5	34.3759	0.339967	3.94826	-	XXXX	U1426A-2H-1A, 81.5cm		2
346	U1426	A	2	H	1	A	82	3.32	4.02		4.02007	39.8	37.9	34.6	34.5965	0.254939	4.18139	-	XXXX	U1426A-2H-1A, 82.0cm		2
346	U1426	A	2	H	1	A	82.5	3.325	4.025		4.02507	39.9	38	34.8	34.6583	0.282145	4.09264	-	XXXX	U1426A-2H-1A, 82.5cm		2
346	U1426	A	2	H	1	A	83	3.33	4.03		4.03007	38.3	36.3	33.1	33.6752	0.347818	4.19725	-	XXXX	U1426A-2H-1A, 83.0cm		2
346	U1426	A	2	H	1	A	83.5	3.335	4.035		4.03507	39.4	37.5	34.2	34.364	0.256563	4.20133	-	XXXX	U1426A-2H-1A, 83.5cm		2
346	U1426	A	2	H	1	A	84	3.34	4.04		4.04007	38.8	36.8	33.6	33.9708	0.345031	4.17173	-	XXXX	U1426A-2H-1A, 84.0cm		2
346	U1426	A	2	H	1	A	84.5	3.345	4.045		4.04507	37.6	35.4	32.2	33.1639	0.470474	4.28579	-	XXXX	U1426A-2H-1A, 84.5cm		2
346	U1426	A	2	H	1	A	85	3.35	4.05		4.05007	38.1	35.9	32.5	33.4553	0.410068	4.43256	-	XXXX	U1426A-2H-1A, 85.0cm		2
346	U1426	A	2	H	1	A	85.5	3.355	4.055		4.05507	37.2	34.7	31.2	32.7684	0.56804	4.65285	-	XXXX	U1426A-2H-1A, 85.5cm		2
346	U1426	A	2	H	1	A	86	3.36	4.06		4.06007	36.6	34	30.2	32.3418	0.548572	4.98813	-	XXXX	U1426A-2H-1A, 86.0cm		2
346	U1426	A	2	H	1	A	86.5	3.365	4.065		4.06507	37.2	34.6	30.6	32.7005	0.485604	5.12668	-	XXXX	U1426A-2H-1A, 86.5cm		2
346	U1426	A	2	H	1	A	87	3.37	4.07		4.07007	37.4	34.9	31	32.8734	0.452103	4.99587	-	XXXX	U1426A-2H-1A, 87.0cm		2
346	U1426	A	2	H	1	A	87.5	3.375	4.075		4.07507	37.2	34.6	30.7	32.7046	0.514145	5.03706	-	XXXX	U1426A-2H-1A, 87.5cm		2
346	U1426	A	2	H	1	A	88	3.38	4.08		4.08007	37.5	34.9	31	32.8867	0.51139	5.01669	-	XXXX	U1426A-2H-1A, 88.0cm		2
346	U1426	A	2	H	1	A	88.5	3.385	4.085		4.08507	37.4	34.9	31.1	32.8774	0.48058	4.90685	-	XXXX	U1426A-2H-1A, 88.5cm		2
346	U1426	A	2	H	1	A	89	3.39	4.09		4.09007	37.2	34.7	30.8	32.752	0.453737	5.00934	-	XXXX	U1426A-2H-1A, 89.0cm		2
346	U1426	A	2	H	1	A	89.5	3.395	4.095		4.09507	36.5	34	30.1	32.3242	0.459585	5.05744	-	XXXX	U1426A-2H-1A, 89.5cm		2
346	U1426	A	2	H	1	A	90	3.4	4.1		4.10007	36.5	34.2	30.4	32.424	0.366603	4.91128	-	XXXX	U1426A-2H-1A, 90.0cm		2
346	U1426	A	2	H	1	A	90.5	3.405	4.105		4.10507	36.4	34.1	30.4	32.3668	0.396181	4.82783	-	XXXX	U1426A-2H-1A, 90.5cm		2
346	U1426	A	2	H	1	A	91	3.41	4.11		4.11007	36.6	34.3	30.8	32.4977	0.452413	4.63555	-	XXXX	U1426A-2H-1A, 91.0cm		2
346	U1426	A	2	H	1	A	91.5	3.415	4.115		4.11507	36.4	34	30.5	32.3272	0.51495	4.67533	-	XXXX	U1426A-2H-1A, 91.5cm		2
346	U1426	A	2	H	1	A	92	3.42	4.12		4.12007	36.3	33.9	30.4	32.2657	0.515864	4.68164	-	XXXX	U1426A-2H-1A, 92.0cm		2
346	U1426	A	2	H	1	A	92.5	3.425	4.125		4.12507	35.7	33.2	29.4	31.8333	0.495698	5.02247	-	XXXX	U1426A-2H-1A, 92.5cm		2
346	U1426	A	2	H	1	A	93	3.43	4.13		4.13007	35.3	32.6	28.4	31.4687	0.507301	5.48097	-	XXXX	U1426A-2H-1A, 93.0cm		2
346	U1426	A	2	H	1	A	93.5	3.435	4.135		4.13507	35	32.3	28	31.2753	0.480936	5.59925	-	XXXX	U1426A-2H-1A, 93.5cm		2
346	U1426	A	2	H	1	A	94	3.44	4.14		4.14007	35	32.3	28	31.2753	0.480936	5.59925	-	XXXX	U1426A-2H-1A, 94.0cm		2
346	U1426	A	2	H	1	A	94.5	3.445	4.145		4.14507	34.9	32.2	28.1	31.2204	0.540827	5.41944	-	XXXX	U1426A-2H-1A, 94.5cm		2
346	U1426	A	2	H	1	A	95	3.45	4.15		4.15007	35	32.2	28	31.2302	0.573505	5.53526	-	XXXX	U1426A-2H-1A, 95.0cm		2
346	U1426	A	2	H	1	A	95.5	3.455	4.155		4.15507	34.4	31.6	27.5	30.8527	0.610128	5.49027	-	XXXX	U1426A-2H-1A, 95.5cm		2
346	U1426	A	2	H	1	A	96	3.46	4.16		4.16007	33.6	30.8	26.8	30.3416	0.650167	5.4614	-	XXXX	U1426A-2H-1A, 96.0cm		2
346	U1426	A	2	H	1	A	96.5	3.465	4.165		4.16507	33.5	30.9	27.5	30.4038	0.702696	4.83406	-	XXXX	U1426A-2H-1A, 96.5cm		2
346	U1426	A	2	H	1	A	97	3.47	4.17		4.17007	32.4	29.9	26.7	29.7444	0.713562	4.69061	-	XXXX	U1426A-2H-1A, 97.0cm		2
346	U1426	A	2	H	1	A	97.5	3.475	4.175		4.17507	34.3	32	29.1	31.0887	0.651178	4.22768	-	XXXX	U1426A-2H-1A, 97.5cm		2
346	U1426	A	2	H	1	A	98	3.48	4.18		4.18007	37.2	35.1	32.1	32.978	0.471142	4.10596	-	XXXX	U1426A-2H-1A, 98.0cm		2
346	U1426	A	2	H	1	A	98.5	3.485	4.185		4.18507	38.1	36	33	33.518	0.464315	4.06049	-	XXXX	U1426A-2H-1A, 98.5cm		2
346	U1426	A	2	H	1	A	99	3.49	4.19		4.19007	38	35.9	33	33.4624	0.493417	3.97912	-	XXXX	U1426A-2H-1A, 99.0cm		2
346	U1426	A	2	H	1	A	99.5	3.495	4.195		4.19507	38.1	35.8	32.8	33.4249	0.582266	4.11149	-	XXXX	U1426A-2H-1A, 99.5cm		2
346	U1426	A	2	H	1	A	100	3.5	4.2		4.20007	37.9	35.6	32.7	33.3093	0.612545	4.0349	-	XXXX	U1426A-2H-1A, 100.0cm		2
346	U1426	A	2	H	1	A	100.5	3.505	4.205		4.20507	37.7	35.4	32.5	33.1894	0.614525	4.04486	-	XXXX	U1426A-2H-1A, 100.5cm		2
346	U1426	A	2	H	1	A	101	3.51	4.21		4.21007	37.9	35.5	32.7	33.2667	0.700338	3.97371	-	XXXX	U1426A-2H-1A, 101.0cm		2
346	U1426	A	2	H	1	A	101.5	3.515	4.215		4.21507	36.9	34.5	31.8	32.6664	0.740656	3.93526	-	XXXX	U1426A-2H-1A, 101.5cm		2
346	U1426	A	2	H	1	A	102	3.52	4.22		4.22007	35.1	32.7	30	31.5534	0.763518	4.02726	-	XXXX	U1426A-2H-1A, 102.0cm		2
346	U1426	A	2	H	1	A	102.5	3.525	4.225		4.22507	36	33.7	30.8	32.1538	0.632107	4.13294	-	XXXX	U1426A-2H-1A, 102.5cm		2
346	U1426	A	2	H	1	A	103	3.53	4.23		4.23007	36	33.6	30.8	32.1098	0.722646	4.06993	-	XXXX	U1426A-2H-1A, 103.0cm		2
346	U1426	A	2	H	1	A	103.5	3.535	4.235		4.23507	34.9	32.5	29.8	31.4276	0.766182	4.03793	-	XXXX	U1426A-2H-1A, 103.5cm		2
346	U1426	A	2	H	1	A	104	3.54	4.24		4.24007	34.7	32.3	29.4	31.2929	0.709352	4.23222	-	XXXX	U1426A-2H-1A, 104.0cm		2
346	U1426	A	2	H	1	A	104.5	3.545	4.245		4.24507	34.1	31.5	28.2	30.7946	0.724642	4.69776	-	XXXX	U1426A-2H-1A, 104.5cm		2
346	U1426	A	2	H	1	A	105	3.55	4.25		4.25007	33.7	31.2	28	30.592	0.695925	4.60156	-	XXXX	U1426A-2H-1A, 105.0cm		2
346	U1426	A	2	H	1	A	105.5	3.555	4.255		4.25507	32.2	29.7	26.4	29.6077	0.685518	4.80212	-	XXXX	U1426A-2H-1A, 105.5cm		2
346	U1426	A	2	H	1	A	106	3.56	4.26		4.26007	31.1	28.5	25.2	28.8188	0.768884	4.91647	-	XXXX	U1426A-2H-1A, 106.0cm		2
346	U1426	A	2	H	1	A	106.5	3.565	4.265		4.26507	31.3	28.6	25.3	28.9015	0.833418	4.932	-	XXXX	U1426A-2H-1A, 106.5cm		2
346	U1426	A	2	H	1	A	107	3.57	4.27		4.27007	33.5	30.9	27.4	30.3994	0.672489	4.92936	-	XXXX	U1426A-2H-1A, 107.0cm		2
346	U1426	A	2	H	1	A	107.5	3.575	4.275		4.27507	36.2	33.7	30.1	32.1518	0.549083	4.8061	-	XXXX	U1426A-2H-1A, 107.5cm		2
346	U1426	A	2	H	1	A	108	3.58	4.28		4.28007	37	34.4	30.8	32.595	0.601946	4.78178	-	XXXX	U1426A-2H-1A, 108.0cm		2
346	U1426	A	2	H	1	A	108.5	3.585	4.285		4.28507	37.4	34.9	31.2	32.8815	0.50907	4.81798	-	XXXX	U1426A-2H-1A, 108.5cm		2
346	U1426	A	2	H	1	A	109	3.59	4.29		4.29007	37.9	35.3	31.8	33.1444	0.620973	4.63718	-	XXXX	U1426A-2H-1A, 109.0cm		2
346	U1426	A	2	H	1	A	109.5	3.595	4.295		4.29507	37.2	34.6	30.9	32.7128	0.571266	4.85822	-	XXXX	U1426A-2H-1A, 109.5cm		2
346	U1426	A	2	H	1	A	110	3.6	4.3		4.30007	36.9	34.4	30.9	32.5857	0.571004	4.67139	-	XXXX	U1426A-2H-1A, 110.0cm		2
346	U1426	A	2	H	1	A	110.5	3.605	4.305		4.30507	37.2	34.7	31.2	32.7684	0.56804	4.65285	-	XXXX	U1426A-2H-1A, 110.5cm		2
346	U1426	A	2	H	1	A	111	3.61	4.31		4.31007	37	34.3	30.7	32.5474	0.662709	4.80925	-	XXXX	U1426A-2H-1A, 111.0cm		2
346	U1426	A	2	H	1	A	111.5	3.615	4.315		4.31507	37.3	34.7	31.5	32.7941	0.713099	4.40782	-	XXXX	U1426A-2H-1A, 111.5cm		2
346	U1426	A	2	H	1	A	112	3.62	4.32		4.32007	37.4	34.8	31.5	32.8507	0.683349	4.49048	-	XXXX	U1426A-2H-1A, 112.0cm		2
346	U1426	A	2	H	1	A	112.5	3.625	4.325		4.32507	37.2	34.5	31.1	32.6777	0.717598	4.61804	-	XXXX	U1426A-2H-1A, 112.5cm		2
346	U1426	A	2	H	1	A	113	3.63	4.33		4.33007	36.7	34	30.7	32.3761	0.752638	4.55915	-	XXXX	U1426A-2H-1A, 113.0cm		2
346	U1426	A	2	H	1	A	113.5	3.635	4.335		4.33507	36.1	33.2	29.4	31.8883	0.739299	5.10825	-	XXXX	U1426A-2H-1A, 113.5cm		2
346	U1426	A	2	H	1	A	114	3.64	4.34		4.34007	35.5	32.5	28.6	31.4601	0.781197	5.27425	-	XXXX	U1426A-2H-1A, 114.0cm		2
346	U1426	A	2	H	1	A	114.5	3.645	4.345		4.34507	35.4	32.4	28.3	31.3887	0.724143	5.46873	-	XXXX	U1426A-2H-1A, 114.5cm		2
346	U1426	A	2	H	1	A	115	3.65	4.35		4.35007	35.3	32.3	28.3	31.3299	0.754833	5.38315	-	XXXX	U1426A-2H-1A, 115.0cm		2
346	U1426	A	2	H	1	A	115.5	3.655	4.355		4.35507	34.8	31.7	27.6	30.959	0.79653	5.54809	-	XXXX	U1426A-2H-1A, 115.5cm		2
346	U1426	A	2	H	1	A	116	3.66	4.36		4.36007	34.8	31.7	27.7	30.9632	0.826039	5.45334	-	XXXX	U1426A-2H-1A, 116.0cm		2
346	U1426	A	2	H	1	A	116.5	3.665	4.365		4.36507	32.9	29.9	25.8	29.7778	0.761327	5.68283	-	XXXX	U1426A-2H-1A, 116.5cm		2
346	U1426	A	2	H	1	A	117	3.67	4.37		4.37007	27.4	25	21.1	26.3002	0.487531	5.82446	-	XXXX	U1426A-2H-1A, 117.0cm		2
346	U1426	A	2	H	1	A	117.5	3.675	4.375		4.37507	27.6	25.3	21.7	26.5167	0.512017	5.44049	-	XXXX	U1426A-2H-1A, 117.5cm		2
346	U1426	A	2	H	1	A	118	3.68	4.38		4.38007	31.1	28.3	24.2	28.6771	0.654443	5.78794	-	XXXX	U1426A-2H-1A, 118.0cm		2
346	U1426	A	2	H	1	A	118.5	3.685	4.385		4.38507	32.9	29.9	25.7	29.7735	0.730973	5.78129	-	XXXX	U1426A-2H-1A, 118.5cm		2
346	U1426	A	2	H	1	A	119	3.69	4.39		4.39007	32	29.1	25.1	29.2362	0.739478	5.63415	-	XXXX	U1426A-2H-1A, 119.0cm		2
346	U1426	A	2	H	1	A	119.5	3.695	4.395		4.39507	31.2	28.3	24.3	28.6967	0.752489	5.7097	-	XXXX	U1426A-2H-1A, 119.5cm		2
346	U1426	A	2	H	1	A	120	3.7	4.4		4.40007	30.8	27.8	23.9	28.375	0.859772	5.6797	-	XXXX	U1426A-2H-1A, 120.0cm		2
346	U1426	A	2	H	1	A	120.5	3.705	4.405		4.40507	31.1	28.3	24.5	28.6906	0.748294	5.48326	-	XXXX	U1426A-2H-1A, 120.5cm		2
346	U1426	A	2	H	1	A	121	3.71	4.41		4.41007	31.2	28.5	24.8	28.8158	0.709853	5.34091	-	XXXX	U1426A-2H-1A, 121.0cm		2
346	U1426	A	2	H	1	A	121.5	3.715	4.415		4.41507	34.3	32	28.8	31.0759	0.561457	4.50566	-	XXXX	U1426A-2H-1A, 121.5cm		2
346	U1426	C	1	H	3	A	136	4.36			4.42007	32.9	30.6	27.3	30.1701	0.545934	4.69255						1
346	U1426	C	1	H	3	A	136.5	4.365			4.42507	36.3	34.4	31.4	32.5259	0.357276	4.10051						1
346	U1426	C	1	H	3	A	137	4.37			4.43007	36.6	34.6	31.5	32.6572	0.386685	4.19942						1
346	U1426	C	1	H	3	A	137.5	4.375			4.43507	37.5	35.4	32.3	33.1548	0.440291	4.17781						1
346	U1426	C	1	H	3	A	138	4.38			4.44007	37.7	35.6	32.5	33.2749	0.438851	4.16739						1
346	U1426	C	1	H	3	A	138.5	4.385			4.44507	37.8	35.6	32.4	33.284	0.468921	4.27501						1
346	U1426	C	1	H	3	A	139	4.39			4.45007	38.5	36.3	33.1	33.7012	0.463599	4.23796						1
346	U1426	C	1	H	3	A	139.5	4.395			4.45507	37.5	35.3	32.4	33.116	0.556883	4.02918						1
346	U1426	C	1	H	3	A	140	4.4			4.46007	37.5	35.4	32.5	33.163	0.497391	4.00355						1
346	U1426	C	1	H	3	A	140.5	4.405			4.46507	36.8	34.6	31.8	32.6964	0.59216	3.97648						1
346	U1426	C	1	H	3	A	141	4.41			4.47007	37.2	35.1	32.2	32.9821	0.499818	4.01845						1
346	U1426	C	1	H	3	A	141.5	4.415			4.47507	37.4	35.2	32.3	33.0557	0.557789	4.03418						1
346	U1426	C	1	H	3	A	142	4.42			4.48007	37.6	35.3	32.4	33.1292	0.615521	4.04987						1
346	U1426	C	1	H	3	A	142.5	4.425			4.48507	37.9	35.6	32.4	33.2971	0.527395	4.29559						1
346	U1426	C	1	H	3	A	143	4.43			4.49007	37.3	34.9	31.6	32.8846	0.564069	4.44298						1
346	U1426	C	1	H	3	A	143.5	4.435			4.49507	36.7	34.4	31.3	32.5754	0.566953	4.2732						1
346	U1426	C	1	H	3	A	144	4.44			4.50007	37.1	34.7	31.5	32.7674	0.594661	4.36601						1
346	U1426	C	1	H	3	A	144.5	4.445			4.50507	37.4	35	31.8	32.9492	0.591674	4.3492						1
346	U1426	C	1	H	3	A	145	4.45			4.51007	36.7	34.3	31.1	32.5236	0.598711	4.38876						1
346	U1426	C	1	H	3	A	145.5	4.455			4.51507	35.9	33.5	30.5	32.0395	0.665434	4.25505						1
346	U1426	C	1	H	3	A	146	4.46			4.52007	36.1	33.7	30.5	32.1549	0.604933	4.42363						1
346	U1426	C	1	H	3	A	146.5	4.465			4.52507	35.8	33.2	29.9	31.868	0.702531	4.58718						1
346	U1426	C	1	H	3	A	147	4.47			4.53007	34.3	31.8	28.4	30.968	0.628455	4.7491						1
346	U1426	C	1	H	3	A	147.5	4.475			4.53507	33.4	30.8	27.3	30.3346	0.673801	4.93671						1
346	U1426	C	1	H	3	A	148	4.48			4.54007	31.6	29.1	25.6	29.1991	0.631597	5.04445						1
346	U1426	C	1	H	3	A	148.5	4.485			4.54507	29.8	27.3	23.6	27.9624	0.592505	5.40188						1
346	U1426	C	1	H	3	A	149	4.49			4.55007	28.5	26.1	22.7	27.117	0.637786	5.17462						1
346	U1426	C	1	H	3	A	149.5	4.495			4.55507	24	22	18.7	23.9938	0.434804	5.37656						1
346	U1426	C	1	H	4	A	0	4.5			4.56007	25.3	23.7	22	25.314	0.679648	3.32992						1
346	U1426	C	1	H	4	A	0.5	4.505			4.56507	30.7	28.3	25.1	28.6575	0.670472	4.78503						1
346	U1426	C	1	H	4	A	1	4.51			4.57007	31.7	29.2	25.9	29.275	0.692472	4.83932						1
346	U1426	C	1	H	4	A	1.5	4.515			4.57507	30.8	28.3	24.5	28.6453	0.54785	5.41273						1
346	U1426	C	1	H	4	A	2	4.52			4.58007	30.4	27.8	23.9	28.3139	0.589965	5.58466						1
346	U1426	C	1	H	4	A	2.5	4.525			4.58507	30.3	27.7	23.8	28.2452	0.591319	5.59423						1
346	U1426	C	1	H	4	A	3	4.53			4.59007	30	27.4	23.4	28.0333	0.563562	5.72692						1
346	U1426	C	1	H	4	A	3.5	4.535			4.59507	29.4	26.8	22.8	27.615	0.571706	5.78797						1
346	U1426	C	1	H	4	A	4	4.54			4.60007	29.8	27.1	23.1	27.8403	0.636221	5.78128						1
346	U1426	C	1	H	4	A	4.5	4.545			4.60507	28.7	26.1	22.4	27.1345	0.679484	5.54194						1
346	U1426	C	1	H	4	A	5	4.55			4.61007	28.1	25.5	21.6	26.6952	0.623469	5.81944						1
346	U1426	C	1	H	4	A	5.5	4.555			4.61507	28.7	26.2	22.4	27.1851	0.575345	5.61357						1
346	U1426	C	1	H	4	A	6	4.56			4.62007	28.6	26.2	22.5	27.174	0.538036	5.4828						1
346	U1426	C	1	H	4	A	6.5	4.565			4.62507	29	26.4	22.9	27.3566	0.739664	5.30142						1
346	U1426	C	1	H	4	A	7	4.57			4.63007	29.1	26.6	23	27.4774	0.63467	5.36325						1
346	U1426	C	1	H	4	A	7.5	4.575			4.63507	29.1	26.5	22.6	27.4086	0.60827	5.71343						1
346	U1426	C	1	H	4	A	8	4.58			4.64007	29.6	26.9	23	27.7053	0.671332	5.69698						1
346	U1426	C	1	H	4	A	8.5	4.585			4.64507	30.2	27.4	23.4	28.0641	0.699868	5.77482						1
346	U1426	C	1	H	4	A	9	4.59			4.65007	30.8	27.9	23.7	28.4147	0.696431	5.95428						1
346	U1426	C	1	H	4	A	9.5	4.595			4.65507	30.8	28	23.9	28.4725	0.658921	5.81768						1
346	U1426	C	1	H	4	A	10	4.6			4.66007	30.8	28	24	28.477	0.690339	5.71524						1
346	U1426	C	1	H	4	A	10.5	4.605			4.66507	30.7	28.1	24	28.5105	0.522974	5.7605						1
346	U1426	C	1	H	4	A	11	4.61			4.67007	30.4	27.8	24	28.3185	0.621643	5.48215						1
346	U1426	C	1	H	4	A	11.5	4.615			4.67507	29.6	27	23.2	27.7643	0.633156	5.55834						1
346	U1426	C	1	H	4	A	12	4.62			4.68007	30.2	27.8	24.4	28.3063	0.613789	5.02658						1
346	U1426	C	1	H	4	A	12.5	4.625			4.68507	33	30.8	27.8	30.2991	0.571697	4.37137						1
346	U1426	C	1	H	4	A	13	4.63			4.69007	33.5	31.5	28.6	30.7271	0.46909	4.19067						1
346	U1426	C	1	H	4	A	13.5	4.635			4.69507	35.7	34	31.1	32.2576	0.268608	3.99014						1
346	U1426	C	1	H	4	A	14	4.64			4.70007	36.1	34.5	31.6	32.551	0.206671	3.94404						1
346	U1426	C	1	H	4	A	14.5	4.645			4.70507	36.9	35.2	32.3	32.9896	0.263381	3.93062						1
346	U1426	C	1	H	4	A	15	4.65			4.71007	37.3	35.6	32.7	33.2305	0.261702	3.91142						1
346	U1426	C	1	H	4	A	15.5	4.655			4.71507	39.5	37.8	34.5	34.5131	0.141907	4.14661						1
346	U1426	C	1	H	4	A	16	4.66			4.72007	40.4	38.7	35.4	35.0323	0.139883	4.10317						1
346	U1426	C	1	H	4	A	16.5	4.665			4.72507	40.1	38.5	35.4	34.9128	0.139227	3.92685						1
346	U1426	C	1	H	4	A	17	4.67			4.73007	40.2	38.5	35.3	34.9214	0.167824	4.02954						1
346	U1426	C	1	H	4	A	17.5	4.675			4.73507	41.1	39.6	36.5	35.5278	0.0817376	3.85905						1
346	U1426	C	1	H	4	A	18	4.68			4.74007	41.7	40.4	37.2	35.9498	-0.0554898	3.86767						1
346	U1426	C	1	H	4	A	18.5	4.685			4.74507	41.5	40.1	37	35.7975	0.026276	3.81859						1
346	U1426	C	1	H	4	A	19	4.69			4.75007	41.7	40.3	37.2	35.9098	0.0262025	3.81024						1
346	U1426	C	1	H	4	A	19.5	4.695			4.75507	42.5	41.3	38.2	36.4425	-0.082143	3.7316						1
346	U1426	C	1	H	4	A	20	4.7			4.76007	40.9	39.5	36.4	35.4588	0.0265	3.84399						1
346	U1426	C	1	H	4	A	20.5	4.705			4.76507	41	39.7	36.6	35.5597	-0.0288097	3.81617						1
346	U1426	C	1	H	4	A	21	4.71			4.77007	42.5	41.3	38	36.4349	-0.135559	3.89099						1
346	U1426	C	1	H	4	A	21.5	4.715			4.77507	43.3	41.9	38.5	36.7857	-0.0536942	3.9826						1
346	U1426	C	1	H	4	A	22	4.72			4.78007	43.1	41.7	38.4	36.6796	-0.0273208	3.91181						1
346	U1426	C	1	H	4	A	22.5	4.725			4.78507	43.1	41.8	38.4	36.7188	-0.107449	3.96816						1
346	U1426	C	1	H	4	A	23	4.73			4.79007	43.3	41.9	38.6	36.7894	-0.0272609	3.90344						1
346	U1426	C	1	H	4	A	23.5	4.735			4.79507	42.5	41.2	38.1	36.3992	-0.0281722	3.75446						1
346	U1426	C	1	H	4	A	24	4.74			4.80007	42.1	40.8	37.7	36.177	-0.0283383	3.77061						1
346	U1426	C	1	H	4	A	24.5	4.745			4.80507	42	40.7	37.7	36.1251	-0.00149028	3.69445						1
346	U1426	C	1	H	4	A	25	4.75			4.81007	42.2	41	37.9	36.2762	-0.0824976	3.74357						1
346	U1426	C	1	H	4	A	25.5	4.755			4.81507	41.9	40.6	37.3	36.0578	-0.0822418	3.93978						1
346	U1426	C	1	H	4	A	26	4.76			4.82007	42.6	41.1	37.4	36.3451	-0.079938	4.27708						1
346	U1426	C	1	H	4	A	26.5	4.765			4.82507	42.3	40.6	36.6	36.0798	-0.0512662	4.58285						1
346	U1426	C	1	H	4	A	27	4.77			4.83007	41.5	39.5	35.3	35.4905	0.0610349	4.86581						1
346	U1426	C	1	H	4	A	27.5	4.775			4.83507	40.7	38.6	34.4	34.99	0.11867	4.93882						1
346	U1426	C	1	H	4	A	28	4.78			4.84007	40.5	38.8	35.2	35.0778	0.0575519	4.34743						1
346	U1426	C	1	H	4	A	28.5	4.785			4.84507	41.2	39.9	36.8	35.6726	-0.0287224	3.80775						1
346	U1426	C	1	H	4	A	29	4.79			4.85007	40.7	39	35.5	35.196	0.084616	4.25438						1
346	U1426	C	1	H	4	A	29.5	4.795			4.85507	40.8	39.1	35.6	35.2531	0.0844692	4.24944						1
346	U1426	C	1	H	4	A	30	4.8			4.86007	40.2	38	34.2	34.6727	0.286525	4.65668						1
346	U1426	C	1	H	4	A	30.5	4.805			4.86507	40.6	38.2	34.2	34.8057	0.343679	4.85346						1
346	U1426	C	1	H	4	A	31	4.81			4.87007	39.6	37.3	33.2	34.2668	0.264184	4.97386						1
346	U1426	C	1	H	4	A	31.5	4.815			4.87507	38.8	36.3	32.2	33.7042	0.385259	5.07883						1
346	U1426	C	1	H	4	A	32	4.82			4.88007	38.2	35.5	31.2	33.2454	0.452139	5.35105						1
346	U1426	C	1	H	4	A	32.5	4.825			4.88507	38.1	35.6	31.6	33.291	0.418318	5.03766						1
346	U1426	C	1	H	4	A	33	4.83			4.89007	38	35.7	31.6	33.3206	0.272098	5.07796						1
346	U1426	C	1	H	4	A	33.5	4.835			4.89507	36.5	33.9	29.9	32.2721	0.491909	5.17637						1
346	U1426	C	1	H	4	A	34	4.84			4.90007	38.6	36.4	32.5	33.7324	0.266478	4.83738						1
346	U1426	C	1	H	4	A	34.5	4.845			4.90507	37.2	34.9	31.2	32.8549	0.390508	4.77633						1
346	U1426	C	1	H	4	A	35	4.85			4.91007	36.4	34.1	30.7	32.3793	0.482955	4.55822						1
346	U1426	C	1	H	4	A	35.5	4.855			4.91507	37.1	34.8	31.1	32.7942	0.391205	4.78267						1
346	U1426	C	1	H	4	A	36	4.86			4.92007	37.4	35.1	31.4	32.9759	0.389125	4.76372						1
346	U1426	C	1	H	4	A	36.5	4.865			4.92507	38.6	36.3	32.7	33.6982	0.409137	4.60363						1
346	U1426	C	1	H	4	A	37	4.87			4.93007	39.3	37.1	33.2	34.1448	0.263179	4.79454						1
346	U1426	C	1	H	4	A	37.5	4.875			4.93507	38.8	36.4	32.4	33.7544	0.354506	4.96489						1
346	U1426	C	1	H	4	A	38	4.88			4.94007	37.9	35.2	31	33.0691	0.482867	5.28377						1
346	U1426	C	1	H	4	A	38.5	4.885			4.94507	38.1	35.4	31.2	33.1894	0.481117	5.26951						1
346	U1426	C	1	H	4	A	39	4.89			4.95007	37.7	35	30.5	32.9362	0.399772	5.56676						1
346	U1426	C	1	H	4	A	39.5	4.895			4.95507	37.8	35.1	31	33.0128	0.512025	5.20183						1
346	U1426	C	1	H	4	A	40	4.9			4.96007	39.1	36.2	31.6	33.6772	0.479366	5.60547						1
346	U1426	C	1	H	4	A	40.5	4.905			4.96507	40.4	37.5	32.7	34.4329	0.413811	5.68263						1
346	U1426	C	1	H	4	A	41	4.91			4.97007	40.5	37.5	32.7	34.4457	0.470831	5.70261						1
346	U1426	C	1	H	4	A	41.5	4.915			4.97507	42.2	39.1	33.7	35.3548	0.35387	6.11346						1
346	U1426	C	1	H	4	A	42	4.92			4.98007	42.6	39.4	33.8	35.5298	0.354561	6.27859						1
346	U1426	C	1	H	4	A	42.5	4.925			4.98507	45.3	41.8	35.8	36.8865	0.397713	6.47746						1
346	U1426	C	1	H	4	A	43	4.93			4.99007	46.1	42.5	36.7	37.2868	0.49654	6.27924						1
346	U1426	C	1	H	4	A	43.5	4.935			4.99507	42.1	38.8	33.4	35.2092	0.467906	6.1763						1
346	U1426	C	1	H	4	A	44	4.94			5.00007	37.7	34.7	30.4	32.8027	0.637389	5.47253						1
346	U1426	A	2	H	2	A	32.5	4.325	5.025		5.00507	34.4	31.4	27.3	30.7529	0.738411	5.55123	-	XXXX	U1426A-2H-2A, 32.5cm		2
346	U1426	A	2	H	2	A	33	4.33	5.03		5.01007	34.1	31.2	27	30.6059	0.648434	5.64185	-	XXXX	U1426A-2H-2A, 33.0cm		2
346	U1426	A	2	H	2	A	33.5	4.335	5.035		5.01507	32.8	29.8	25.7	29.7119	0.762925	5.69197	-	XXXX	U1426A-2H-2A, 33.5cm		2
346	U1426	A	2	H	2	A	34	4.34	5.04		5.02007	32.4	29.4	25.1	29.438	0.708245	5.92821	-	XXXX	U1426A-2H-2A, 34.0cm		2
346	U1426	A	2	H	2	A	34.5	4.345	5.045		5.02507	32.9	29.9	25.6	29.7691	0.700638	5.87994	-	XXXX	U1426A-2H-2A, 34.5cm		2
346	U1426	A	2	H	2	A	35	4.35	5.05		5.03007	33.5	30.3	26	30.0608	0.823096	5.88745	-	XXXX	U1426A-2H-2A, 35.0cm		2
346	U1426	A	2	H	2	A	35.5	4.355	5.055		5.03507	32.4	29.3	25	29.3862	0.775274	5.96107	-	XXXX	U1426A-2H-2A, 35.5cm		2
346	U1426	A	2	H	2	A	36	4.36	5.06		5.04007	31.7	28.7	24.5	28.9736	0.750195	5.89674	-	XXXX	U1426A-2H-2A, 36.0cm		2
346	U1426	A	2	H	2	A	36.5	4.365	5.065		5.04507	31.7	28.6	24.1	28.9078	0.725545	6.23503	-	XXXX	U1426A-2H-2A, 36.5cm		2
346	U1426	A	2	H	2	A	37	4.37	5.07		5.05007	32.3	29.3	25.2	29.3802	0.771053	5.73837	-	XXXX	U1426A-2H-2A, 37.0cm		2
346	U1426	A	2	H	2	A	37.5	4.375	5.075		5.05507	35.6	33	29.1	31.7181	0.529549	5.1503	-	XXXX	U1426A-2H-2A, 37.5cm		2
346	U1426	A	2	H	2	A	38	4.38	5.08		5.06007	38.1	35.4	31.4	33.1975	0.537452	5.09237	-	XXXX	U1426A-2H-2A, 38.0cm		2
346	U1426	A	2	H	2	A	38.5	4.385	5.085		5.06507	38.6	35.9	31.9	33.4966	0.532771	5.05877	-	XXXX	U1426A-2H-2A, 38.5cm		2
346	U1426	A	2	H	2	A	39	4.39	5.09		5.07007	37.8	35.2	31.3	33.0679	0.508676	4.99659	-	XXXX	U1426A-2H-2A, 39.0cm		2
346	U1426	A	2	H	2	A	39.5	4.395	5.095		5.07507	38.1	35.4	31.4	33.1975	0.537452	5.09237	-	XXXX	U1426A-2H-2A, 39.5cm		2
346	U1426	A	2	H	2	A	40	4.4	5.1		5.08007	37.5	34.8	31.1	32.8476	0.628518	4.86612	-	XXXX	U1426A-2H-2A, 40.0cm		2
346	U1426	A	2	H	2	A	40.5	4.405	5.105		5.08507	37.7	35.1	31.5	33.0198	0.594686	4.73757	-	XXXX	U1426A-2H-2A, 40.5cm		2
346	U1426	A	2	H	2	A	41	4.41	5.11		5.09007	39.6	37	33	34.1338	0.465545	4.96713	-	XXXX	U1426A-2H-2A, 41.0cm		2
346	U1426	A	2	H	2	A	41.5	4.415	5.115		5.09507	40.2	37.4	33.1	34.3814	0.494106	5.23913	-	XXXX	U1426A-2H-2A, 41.5cm		2
346	U1426	A	2	H	2	A	42	4.42	5.12		5.10007	39.2	36.3	31.9	33.7444	0.533891	5.4225	-	XXXX	U1426A-2H-2A, 42.0cm		2
346	U1426	A	2	H	2	A	42.5	4.425	5.125		5.10507	39.3	36.4	31.8	33.7956	0.47762	5.59048	-	XXXX	U1426A-2H-2A, 42.5cm		2
346	U1426	A	2	H	2	A	43	4.43	5.13		5.11007	39.1	36.2	31.6	33.6772	0.479366	5.60547	-	XXXX	U1426A-2H-2A, 43.0cm		2
346	U1426	A	2	H	2	A	43.5	4.435	5.135		5.11507	38.2	35.2	30.7	33.0968	0.575495	5.61362	-	XXXX	U1426A-2H-2A, 43.5cm		2
346	U1426	A	2	H	2	A	44	4.44	5.14		5.12007	36	33	28.5	31.7483	0.600076	5.79229	-	XXXX	U1426A-2H-2A, 44.0cm		2
346	U1426	A	2	H	2	A	44.5	4.445	5.145		5.12507	38.1	35.2	30.7	33.0835	0.516459	5.59289	-	XXXX	U1426A-2H-2A, 44.5cm		2
346	U1426	A	2	H	2	A	45	4.45	5.15		5.13007	36.4	33.4	28.8	31.993	0.566634	5.85095	-	XXXX	U1426A-2H-2A, 45.0cm		2
346	U1426	A	2	H	2	A	45.5	4.455	5.155		5.13507	35.7	32.5	27.7	31.4503	0.642471	6.1616	-	XXXX	U1426A-2H-2A, 45.5cm		2
346	U1426	A	2	H	2	A	46	4.46	5.16		5.14007	35.9	32.8	28.1	31.6288	0.605985	6.01827	-	XXXX	U1426A-2H-2A, 46.0cm		2
346	U1426	A	2	H	2	A	46.5	4.465	5.165		5.14507	35.3	32.2	27.6	31.2554	0.642627	5.97833	-	XXXX	U1426A-2H-2A, 46.5cm		2
346	U1426	A	2	H	2	A	47	4.47	5.17		5.15007	35	31.9	27.3	31.0652	0.646569	6.00579	-	XXXX	U1426A-2H-2A, 47.0cm		2
346	U1426	A	2	H	2	A	47.5	4.475	5.175		5.15507	35.1	32.1	27.7	31.1865	0.640292	5.77609	-	XXXX	U1426A-2H-2A, 47.5cm		2
346	U1426	A	2	H	2	A	48	4.48	5.18		5.16007	36.1	33	28.5	31.7621	0.661305	5.81381	-	XXXX	U1426A-2H-2A, 48.0cm		2
346	U1426	A	2	H	2	A	48.5	4.485	5.185		5.16507	34.9	31.7	27.1	30.9519	0.711888	6.04635	-	XXXX	U1426A-2H-2A, 48.5cm		2
346	U1426	A	2	H	2	A	49	4.49	5.19		5.17007	34.9	31.7	27.2	30.9562	0.741267	5.95078	-	XXXX	U1426A-2H-2A, 49.0cm		2
346	U1426	A	2	H	2	A	49.5	4.495	5.195		5.17507	33.9	30.8	26.3	30.3632	0.691418	6.01269	-	XXXX	U1426A-2H-2A, 49.5cm		2
346	U1426	A	2	H	2	A	50	4.5	5.2		5.18007	33.4	30.3	26.1	30.0506	0.789035	5.76701	-	XXXX	U1426A-2H-2A, 50.0cm		2
346	U1426	A	2	H	2	A	50.5	4.505	5.205		5.18507	35	32.1	27.9	31.1809	0.636842	5.56538	-	XXXX	U1426A-2H-2A, 50.5cm		2
346	U1426	A	2	H	2	A	51	4.51	5.21		5.19007	34.1	31	26.6	30.4969	0.718275	5.89695	-	XXXX	U1426A-2H-2A, 51.0cm		2
346	U1426	A	2	H	2	A	51.5	4.515	5.215		5.19507	33.4	30.3	26	30.0463	0.758935	5.86483	-	XXXX	U1426A-2H-2A, 51.5cm		2
346	U1426	A	2	H	2	A	52	4.52	5.22		5.20007	33.7	30.6	26.2	30.2377	0.724269	5.93431	-	XXXX	U1426A-2H-2A, 52.0cm		2
346	U1426	A	2	H	2	A	52.5	4.525	5.225		5.20507	33.3	30.1	25.7	29.9255	0.796412	6.00478	-	XXXX	U1426A-2H-2A, 52.5cm		2
346	U1426	A	2	H	2	A	53	4.53	5.23		5.21007	33.9	30.7	26.4	30.3214	0.816336	5.85016	-	XXXX	U1426A-2H-2A, 53.0cm		2
346	U1426	A	2	H	2	A	53.5	4.535	5.235		5.21507	33.8	30.7	26.4	30.307	0.752658	5.82771	-	XXXX	U1426A-2H-2A, 53.5cm		2
346	U1426	A	2	H	2	A	54	4.54	5.24		5.22007	33.4	30.3	25.9	30.042	0.728854	5.96283	-	XXXX	U1426A-2H-2A, 54.0cm		2
346	U1426	A	2	H	2	A	54.5	4.545	5.245		5.22507	32.5	29.4	25.2	29.4572	0.804117	5.85152	-	XXXX	U1426A-2H-2A, 54.5cm		2
346	U1426	A	2	H	2	A	55	4.55	5.25		5.23007	33.6	30.6	26.2	30.2232	0.660357	5.91182	-	XXXX	U1426A-2H-2A, 55.0cm		2
346	U1426	A	2	H	2	A	55.5	4.555	5.255		5.23507	32.2	29	24.4	29.1874	0.754311	6.31697	-	XXXX	U1426A-2H-2A, 55.5cm		2
346	U1426	A	2	H	2	A	56	4.56	5.26		5.24007	31.3	28.2	23.8	28.641	0.763316	6.1756	-	XXXX	U1426A-2H-2A, 56.0cm		2
346	U1426	A	2	H	2	A	56.5	4.565	5.265		5.24507	32.9	29.9	25.6	29.7691	0.700638	5.87994	-	XXXX	U1426A-2H-2A, 56.5cm		2
346	U1426	A	2	H	2	A	57	4.57	5.27		5.25007	34	31.2	27.3	30.6045	0.674828	5.3325	-	XXXX	U1426A-2H-2A, 57.0cm		2
346	U1426	A	2	H	2	A	57.5	4.575	5.275		5.25507	35.6	32.9	29	31.6694	0.591847	5.1792	-	XXXX	U1426A-2H-2A, 57.5cm		2
346	U1426	A	2	H	2	A	58	4.58	5.28		5.26007	36.4	33.8	29.9	32.2146	0.521691	5.09267	-	XXXX	U1426A-2H-2A, 58.0cm		2
346	U1426	A	2	H	2	A	58.5	4.585	5.285		5.26507	38.5	35.8	31.9	33.441	0.561733	4.97767	-	XXXX	U1426A-2H-2A, 58.5cm		2
346	U1426	A	2	H	2	A	59	4.59	5.29		5.27007	38.8	36.2	32.4	33.6699	0.52784	4.84435	-	XXXX	U1426A-2H-2A, 59.0cm		2
346	U1426	A	2	H	2	A	59.5	4.595	5.295		5.27507	39	36.4	32.6	33.7884	0.526059	4.83192	-	XXXX	U1426A-2H-2A, 59.5cm		2
346	U1426	A	2	H	2	A	60	4.6	5.3		5.28007	39.6	37.1	33.2	34.1834	0.435126	4.85484	-	XXXX	U1426A-2H-2A, 60.0cm		2
346	U1426	A	2	H	2	A	60.5	4.605	5.305		5.28507	39.6	37.1	33.3	34.1874	0.462768	4.76909	-	XXXX	U1426A-2H-2A, 60.5cm		2
346	U1426	A	2	H	2	A	61	4.61	5.31		5.29007	40.1	37.5	33.4	34.4218	0.434203	5.02124	-	XXXX	U1426A-2H-2A, 61.0cm		2
346	U1426	A	2	H	2	A	61.5	4.615	5.315		5.29507	39.3	36.7	32.6	33.9535	0.440204	5.07279	-	XXXX	U1426A-2H-2A, 61.5cm		2
346	U1426	A	2	H	2	A	62	4.62	5.32		5.30007	39.7	37	32.6	34.1309	0.412606	5.33256	-	XXXX	U1426A-2H-2A, 62.0cm		2
346	U1426	A	2	H	2	A	62.5	4.625	5.325		5.30507	39.5	36.9	32.5	34.0593	0.355796	5.31934	-	XXXX	U1426A-2H-2A, 62.5cm		2
346	U1426	A	2	H	2	A	63	4.63	5.33		5.31007	39.9	37.3	32.8	34.2896	0.325767	5.37805	-	XXXX	U1426A-2H-2A, 63.0cm		2
346	U1426	A	2	H	2	A	63.5	4.635	5.335		5.31507	40.3	37.5	33	34.4318	0.438619	5.40415	-	XXXX	U1426A-2H-2A, 63.5cm		2
346	U1426	A	2	H	2	A	64	4.64	5.34		5.32007	40.2	37.3	32.7	34.3242	0.469965	5.52451	-	XXXX	U1426A-2H-2A, 64.0cm		2
346	U1426	A	2	H	2	A	64.5	4.645	5.345		5.32507	39.3	36.4	31.9	33.7996	0.505277	5.50283	-	XXXX	U1426A-2H-2A, 64.5cm		2
346	U1426	A	2	H	2	A	65	4.65	5.35		5.33007	38.3	35.5	31	33.2506	0.454806	5.54931	-	XXXX	U1426A-2H-2A, 65.0cm		2
346	U1426	A	2	H	2	A	65.5	4.655	5.355		5.33507	38.8	35.8	31.1	33.4484	0.513585	5.74506	-	XXXX	U1426A-2H-2A, 65.5cm		2
346	U1426	A	2	H	2	A	66	4.66	5.36		5.34007	37.8	34.8	30.2	32.8511	0.55155	5.73495	-	XXXX	U1426A-2H-2A, 66.0cm		2
346	U1426	A	2	H	2	A	66.5	4.665	5.365		5.34507	37.8	34.9	30.2	32.8943	0.462941	5.79622	-	XXXX	U1426A-2H-2A, 66.5cm		2
346	U1426	A	2	H	2	A	67	4.67	5.37		5.35007	37	34	29.1	32.3509	0.474553	6.07557	-	XXXX	U1426A-2H-2A, 67.0cm		2
346	U1426	A	2	H	2	A	67.5	4.675	5.375		5.35507	36.3	33.3	28.4	31.9186	0.481435	6.13839	-	XXXX	U1426A-2H-2A, 67.5cm		2
346	U1426	A	2	H	2	A	68	4.68	5.38		5.36007	35.1	32	27.2	31.1203	0.586702	6.18709	-	XXXX	U1426A-2H-2A, 68.0cm		2
346	U1426	A	2	H	2	A	68.5	4.685	5.385		5.36507	34	30.8	25.9	30.3605	0.6361	6.42544	-	XXXX	U1426A-2H-2A, 68.5cm		2
346	U1426	A	2	H	2	A	69	4.69	5.39		5.37007	33.4	30.3	25.5	30.0247	0.608713	6.35657	-	XXXX	U1426A-2H-2A, 69.0cm		2
346	U1426	A	2	H	2	A	69.5	4.695	5.395		5.37507	32.4	29.3	24.7	29.373	0.683689	6.26192	-	XXXX	U1426A-2H-2A, 69.5cm		2
346	U1426	A	2	H	2	A	70	4.7	5.4		5.38007	32.7	29.6	25	29.5724	0.679112	6.23058	-	XXXX	U1426A-2H-2A, 70.0cm		2
346	U1426	A	2	H	2	A	70.5	4.705	5.405		5.38507	33.9	30.7	26	30.3042	0.69704	6.23993	-	XXXX	U1426A-2H-2A, 70.5cm		2
346	U1426	A	2	H	2	A	71	4.71	5.41		5.39007	34.8	31.6	26.8	30.8796	0.654553	6.24774	-	XXXX	U1426A-2H-2A, 71.0cm		2
346	U1426	A	2	H	2	A	71.5	4.715	5.415		5.39507	34.9	31.5	26.4	30.8315	0.693805	6.59162	-	XXXX	U1426A-2H-2A, 71.5cm		2
346	U1426	A	2	H	2	A	72	4.72	5.42		5.40007	34.8	31.4	26.1	30.759	0.636701	6.79663	-	XXXX	U1426A-2H-2A, 72.0cm		2
346	U1426	A	2	H	2	A	72.5	4.725	5.425		5.40507	34.7	31.2	25.9	30.6449	0.702923	6.84087	-	XXXX	U1426A-2H-2A, 72.5cm		2
346	U1426	A	2	H	2	A	73	4.73	5.43		5.41007	34.3	30.8	25.4	30.3825	0.679706	6.98448	-	XXXX	U1426A-2H-2A, 73.0cm		2
346	U1426	A	2	H	2	A	73.5	4.735	5.435		5.41507	33.8	30.2	24.8	30.0064	0.753687	7.07749	-	XXXX	U1426A-2H-2A, 73.5cm		2
346	U1426	A	2	H	2	A	74	4.74	5.44		5.42007	34.2	30.6	25.1	30.263	0.717393	7.12948	-	XXXX	U1426A-2H-2A, 74.0cm		2
346	U1426	A	2	H	2	A	74.5	4.745	5.445		5.42507	33.8	30.4	25	30.1079	0.621551	7.00858	-	XXXX	U1426A-2H-2A, 74.5cm		2
346	U1426	A	2	H	2	A	75	4.75	5.45		5.43007	33.6	30.2	25.2	29.9943	0.743739	6.63331	-	XXXX	U1426A-2H-2A, 75.0cm		2
346	U1426	A	2	H	2	A	75.5	4.755	5.455		5.43507	33.9	30.4	25.1	30.1267	0.71559	6.93158	-	XXXX	U1426A-2H-2A, 75.5cm		2
346	U1426	A	2	H	2	A	76	4.76	5.46		5.44007	32.7	29.3	23.9	29.3826	0.638111	7.14165	-	XXXX	U1426A-2H-2A, 76.0cm		2
346	U1426	A	2	H	2	A	76.5	4.765	5.465		5.44507	30.5	27.3	22.5	28.0203	0.72197	6.71958	-	XXXX	U1426A-2H-2A, 76.5cm		2
346	U1426	A	2	H	2	A	77	4.77	5.47		5.45007	30.4	27.4	22.9	28.0722	0.678009	6.34407	-	XXXX	U1426A-2H-2A, 77.0cm		2
346	U1426	A	2	H	2	A	77.5	4.775	5.475		5.45507	31	28	23.6	28.4894	0.699561	6.1735	-	XXXX	U1426A-2H-2A, 77.5cm		2
346	U1426	A	2	H	2	A	78	4.78	5.48		5.46007	31.2	28.2	23.7	28.6214	0.6652	6.25481	-	XXXX	U1426A-2H-2A, 78.0cm		2
346	U1426	A	2	H	2	A	78.5	4.785	5.485		5.46507	31.4	28.3	23.6	28.6956	0.668595	6.47311	-	XXXX	U1426A-2H-2A, 78.5cm		2
346	U1426	A	2	H	2	A	79	4.79	5.49		5.47007	31.5	28.3	23.5	28.7063	0.704654	6.59975	-	XXXX	U1426A-2H-2A, 79.0cm		2
346	U1426	A	2	H	2	A	79.5	4.795	5.495		5.47507	31.9	28.7	24	28.9814	0.728734	6.45149	-	XXXX	U1426A-2H-2A, 79.5cm		2
346	U1426	A	2	H	2	A	80	4.8	5.5		5.48007	31.4	28.3	23.6	28.6956	0.668595	6.47311	-	XXXX	U1426A-2H-2A, 80.0cm		2
346	U1426	A	2	H	2	A	80.5	4.805	5.505		5.48507	31	27.8	23.3	28.3785	0.806663	6.34645	-	XXXX	U1426A-2H-2A, 80.5cm		2
346	U1426	A	2	H	2	A	81	4.81	5.51		5.49007	31.9	28.7	24.3	28.9947	0.820961	6.14606	-	XXXX	U1426A-2H-2A, 81.0cm		2
346	U1426	A	2	H	2	A	81.5	4.815	5.515		5.49507	31.6	28.5	23.8	28.8313	0.665438	6.45051	-	XXXX	U1426A-2H-2A, 81.5cm		2
346	U1426	A	2	H	2	A	82	4.82	5.52		5.50007	32.2	28.9	24.2	29.1309	0.791465	6.45253	-	XXXX	U1426A-2H-2A, 82.0cm		2
346	U1426	A	2	H	2	A	82.5	4.825	5.525		5.50507	32.1	28.9	24.4	29.1248	0.786662	6.22639	-	XXXX	U1426A-2H-2A, 82.5cm		2
346	U1426	A	2	H	2	A	83	4.83	5.53		5.51007	32.7	29.4	24.8	29.4692	0.812968	6.29743	-	XXXX	U1426A-2H-2A, 83.0cm		2
346	U1426	A	2	H	2	A	83.5	4.835	5.535		5.51507	33	29.7	25.1	29.668	0.807655	6.26599	-	XXXX	U1426A-2H-2A, 83.5cm		2
346	U1426	A	2	H	2	A	84	4.84	5.54		5.52007	32.9	29.6	24.8	29.5932	0.748947	6.4766	-	XXXX	U1426A-2H-2A, 84.0cm		2
346	U1426	A	2	H	2	A	84.5	4.845	5.545		5.52507	32.1	28.9	24.2	29.1159	0.72539	6.4293	-	XXXX	U1426A-2H-2A, 84.5cm		2
346	U1426	A	2	H	2	A	85	4.85	5.55		5.53007	31.4	28.2	23.6	28.6472	0.768245	6.4049	-	XXXX	U1426A-2H-2A, 85.0cm		2
346	U1426	A	2	H	2	A	85.5	4.855	5.555		5.53507	31.1	27.9	23.2	28.438	0.742538	6.54277	-	XXXX	U1426A-2H-2A, 85.5cm		2
346	U1426	A	2	H	2	A	86	4.86	5.56		5.54007	31.2	28	23.3	28.5064	0.740774	6.53114	-	XXXX	U1426A-2H-2A, 86.0cm		2
346	U1426	A	2	H	2	A	86.5	4.865	5.565		5.54507	31.6	28.4	23.8	28.7831	0.764696	6.38255	-	XXXX	U1426A-2H-2A, 86.5cm		2
346	U1426	A	2	H	2	A	87	4.87	5.57		5.55007	31.7	28.3	23.7	28.7455	0.900041	6.44073	-	XXXX	U1426A-2H-2A, 87.0cm		2
346	U1426	A	2	H	2	A	87.5	4.875	5.575		5.55507	32.3	29.1	24.5	29.2543	0.752617	6.30624	-	XXXX	U1426A-2H-2A, 87.5cm		2
346	U1426	A	2	H	2	A	88	4.88	5.58		5.56007	32.2	29.1	24.6	29.2439	0.717391	6.18219	-	XXXX	U1426A-2H-2A, 88.0cm		2
346	U1426	A	2	H	2	A	88.5	4.885	5.585		5.56507	32.5	29.2	24.6	29.336	0.816563	6.31868	-	XXXX	U1426A-2H-2A, 88.5cm		2
346	U1426	A	2	H	2	A	89	4.89	5.59		5.57007	32.3	29.1	24.6	29.2587	0.783168	6.20533	-	XXXX	U1426A-2H-2A, 89.0cm		2
346	U1426	A	2	H	2	A	89.5	4.895	5.595		5.57507	32.6	29.4	24.8	29.4544	0.747596	6.27442	-	XXXX	U1426A-2H-2A, 89.5cm		2
346	U1426	A	2	H	2	A	90	4.9	5.6		5.58007	33.8	30.5	25.6	30.18	0.704479	6.47937	-	XXXX	U1426A-2H-2A, 90.0cm		2
346	U1426	A	2	H	2	A	90.5	4.905	5.605		5.58507	33.6	30.1	25.2	29.9477	0.839811	6.56758	-	XXXX	U1426A-2H-2A, 90.5cm		2
346	U1426	A	2	H	2	A	91	4.91	5.61		5.59007	34.1	30.8	26	30.3792	0.729557	6.34999	-	XXXX	U1426A-2H-2A, 91.0cm		2
346	U1426	A	2	H	2	A	91.5	4.915	5.615		5.59507	35.1	31.7	26.9	30.9718	0.778496	6.28204	-	XXXX	U1426A-2H-2A, 91.5cm		2
346	U1426	A	2	H	2	A	92	4.92	5.62		5.60007	34.7	31.4	26.8	30.7743	0.779224	6.09676	-	XXXX	U1426A-2H-2A, 92.0cm		2
346	U1426	A	2	H	2	A	92.5	4.925	5.625		5.60507	34.8	31.6	26.9	30.8839	0.683941	6.15165	-	XXXX	U1426A-2H-2A, 92.5cm		2
346	U1426	A	2	H	2	A	93	4.93	5.63		5.61007	35.8	32.8	28.3	31.6233	0.602452	5.80944	-	XXXX	U1426A-2H-2A, 93.0cm		2
346	U1426	A	2	H	2	A	93.5	4.935	5.635		5.61507	37.7	35.1	30.7	32.9873	0.367992	5.44881	-	XXXX	U1426A-2H-2A, 93.5cm		2
346	U1426	A	2	H	2	A	94	4.94	5.64		5.62007	39.4	37	32.3	34.0803	0.157204	5.53246	-	XXXX	U1426A-2H-2A, 94.0cm		2
346	U1426	A	2	H	2	A	94.5	4.945	5.645		5.62507	40.3	37.8	33.1	34.5599	0.211368	5.49509	-	XXXX	U1426A-2H-2A, 94.5cm		2
346	U1426	A	2	H	2	A	95	4.95	5.65		5.63007	41	38.5	33.7	34.9598	0.181376	5.53115	-	XXXX	U1426A-2H-2A, 95.0cm		2
346	U1426	A	2	H	2	A	95.5	4.955	5.655		5.63507	41.3	38.8	34	35.1316	0.180244	5.51022	-	XXXX	U1426A-2H-2A, 95.5cm		2
346	U1426	A	2	H	2	A	96	4.96	5.66		5.64007	41.6	39.2	34.2	35.3394	0.0693283	5.63148	-	XXXX	U1426A-2H-2A, 96.0cm		2
346	U1426	A	2	H	2	A	96.5	4.965	5.665		5.64507	42	39.6	34.8	35.5738	0.121856	5.43623	-	XXXX	U1426A-2H-2A, 96.5cm		2
346	U1426	A	2	H	2	A	97	4.97	5.67		5.65007	42.5	40.2	35.5	35.9029	0.0917541	5.29466	-	XXXX	U1426A-2H-2A, 97.0cm		2
346	U1426	A	2	H	2	A	97.5	4.975	5.675		5.65507	42.8	40.6	35.8	36.1106	0.0097273	5.33235	-	XXXX	U1426A-2H-2A, 97.5cm		2
346	U1426	A	2	H	2	A	98	4.98	5.68		5.66007	42.1	40	35.4	35.7698	0.00850262	5.18624	-	XXXX	U1426A-2H-2A, 98.0cm		2
346	U1426	A	2	H	2	A	98.5	4.985	5.685		5.66507	42.9	40.6	35.5	36.1115	-0.0147392	5.59852	-	XXXX	U1426A-2H-2A, 98.5cm		2
346	U1426	A	2	H	2	A	99	4.99	5.69		5.67007	43.3	41	35.9	36.3339	-0.0150948	5.57151	-	XXXX	U1426A-2H-2A, 99.0cm		2
346	U1426	A	2	H	2	A	99.5	4.995	5.695		5.67507	44.4	42.1	36.8	36.9321	-0.0678366	5.6608	-	XXXX	U1426A-2H-2A, 99.5cm		2
346	U1426	A	2	H	2	A	100	5	5.7		5.68007	43.9	41.6	36.2	36.6542	-0.0937713	5.77608	-	XXXX	U1426A-2H-2A, 100.0cm		2
346	U1426	A	2	H	2	A	100.5	5.005	5.705		5.68507	43.8	41.4	36.1	36.5598	-0.0134551	5.72703	-	XXXX	U1426A-2H-2A, 100.5cm		2
346	U1426	A	2	H	2	A	101	5.01	5.71		5.69007	44.2	41.9	36.4	36.8153	-0.119688	5.83671	-	XXXX	U1426A-2H-2A, 101.0cm		2
346	U1426	A	2	H	2	A	101.5	5.015	5.715		5.69507	43.8	41.4	36.1	36.5598	-0.0134551	5.72703	-	XXXX	U1426A-2H-2A, 101.5cm		2
346	U1426	A	2	H	2	A	102	5.02	5.72		5.70007	43.6	41.2	36	36.4531	0.0128924	5.65889	-	XXXX	U1426A-2H-2A, 102.0cm		2
346	U1426	A	2	H	2	A	102.5	5.025	5.725		5.70507	43.7	41.4	36.3	36.5552	-0.0154404	5.54489	-	XXXX	U1426A-2H-2A, 102.5cm		2
346	U1426	A	2	H	2	A	103	5.03	5.73		5.71007	43.3	41.1	36	36.3772	-0.069616	5.54589	-	XXXX	U1426A-2H-2A, 103.0cm		2
346	U1426	A	2	H	2	A	103.5	5.035	5.735		5.71507	43.1	40.8	35.8	36.2266	0.0114057	5.50274	-	XXXX	U1426A-2H-2A, 103.5cm		2
346	U1426	A	2	H	2	A	104	5.04	5.74		5.72007	43.1	40.9	35.8	36.2663	-0.0695972	5.55924	-	XXXX	U1426A-2H-2A, 104.0cm		2
346	U1426	A	2	H	2	A	104.5	5.045	5.745		5.72507	43.2	41	35.9	36.3218	-0.0696068	5.55255	-	XXXX	U1426A-2H-2A, 104.5cm		2
346	U1426	A	2	H	2	A	105	5.05	5.75		5.73007	42.6	40.4	35.4	35.9913	-0.0430599	5.51033	-	XXXX	U1426A-2H-2A, 105.0cm		2
346	U1426	A	2	H	2	A	105.5	5.055	5.755		5.73507	42.2	39.9	34.9	35.723	0.0125211	5.5634	-	XXXX	U1426A-2H-2A, 105.5cm		2
346	U1426	A	2	H	2	A	106	5.06	5.76		5.74007	42.4	40.1	35	35.8317	-0.0142799	5.63286	-	XXXX	U1426A-2H-2A, 106.0cm		2
346	U1426	A	2	H	2	A	106.5	5.065	5.765		5.74507	42.3	39.9	34.8	35.7316	0.0412587	5.66604	-	XXXX	U1426A-2H-2A, 106.5cm		2
346	U1426	A	2	H	2	A	107	5.07	5.77		5.75007	42.5	40	34.9	35.8002	0.0963101	5.67827	-	XXXX	U1426A-2H-2A, 107.0cm		2
346	U1426	A	2	H	2	A	107.5	5.075	5.775		5.75507	42.4	40	35	35.7916	0.0676289	5.57579	-	XXXX	U1426A-2H-2A, 107.5cm		2
346	U1426	A	2	H	2	A	108	5.08	5.78		5.76007	42.5	40.1	35.1	35.8478	0.0674217	5.56895	-	XXXX	U1426A-2H-2A, 108.0cm		2
346	U1426	A	2	H	2	A	108.5	5.085	5.785		5.76507	42.2	39.8	34.9	35.6828	0.094669	5.50617	-	XXXX	U1426A-2H-2A, 108.5cm		2
346	U1426	A	2	H	2	A	109	5.09	5.79		5.77007	42.2	39.7	34.7	35.635	0.123695	5.6158	-	XXXX	U1426A-2H-2A, 109.0cm		2
346	U1426	A	2	H	2	A	109.5	5.095	5.795		5.77507	42.3	39.8	34.7	35.6876	0.0968258	5.69235	-	XXXX	U1426A-2H-2A, 109.5cm		2
346	U1426	A	2	H	2	A	110	5.1	5.8		5.78007	42.4	40	34.8	35.7841	0.0145478	5.74239	-	XXXX	U1426A-2H-2A, 110.0cm		2
346	U1426	A	2	H	2	A	110.5	5.105	5.805		5.78507	42.5	40	34.8	35.7964	0.0698089	5.76163	-	XXXX	U1426A-2H-2A, 110.5cm		2
346	U1426	A	2	H	2	A	111	5.11	5.81		5.79007	41	38.2	33	34.8098	0.244123	5.95403	-	XXXX	U1426A-2H-2A, 111.0cm		2
346	U1426	A	2	H	2	A	111.5	5.115	5.815		5.79507	40.6	38	33.2	34.6845	0.240061	5.5864	-	XXXX	U1426A-2H-2A, 111.5cm		2
346	U1426	A	2	H	2	A	112	5.12	5.82		5.80007	40.5	37.8	32.8	34.5737	0.243526	5.79281	-	XXXX	U1426A-2H-2A, 112.0cm		2
346	U1426	A	2	H	2	A	112.5	5.125	5.825		5.80507	38.1	35.2	30.5	33.0755	0.460269	5.77201	-	XXXX	U1426A-2H-2A, 112.5cm		2
346	U1426	A	2	H	2	A	113	5.13	5.83		5.81007	38.5	35.7	30.9	33.3583	0.369295	5.80078	-	XXXX	U1426A-2H-2A, 113.0cm		2
346	U1426	A	2	H	2	A	113.5	5.135	5.835		5.81507	39.9	37.1	32.1	34.1788	0.304638	5.86658	-	XXXX	U1426A-2H-2A, 113.5cm		2
346	U1426	A	2	H	2	A	114	5.14	5.84		5.82007	37.8	34.8	30.2	32.8511	0.55155	5.73495	-	XXXX	U1426A-2H-2A, 114.0cm		2
346	U1426	A	2	H	2	A	114.5	5.145	5.845		5.82507	35.6	32.7	28.1	31.5425	0.512945	5.89016	-	XXXX	U1426A-2H-2A, 114.5cm		2
346	U1426	A	2	H	2	A	115	5.15	5.85		5.83007	34.9	32	27.3	31.0963	0.491064	6.04795	-	XXXX	U1426A-2H-2A, 115.0cm		2
346	U1426	A	2	H	2	A	115.5	5.155	5.855		5.83507	34.6	31.6	27	30.8597	0.587746	6.01159	-	XXXX	U1426A-2H-2A, 115.5cm		2
346	U1426	A	2	H	2	A	116	5.16	5.86		5.84007	36.6	33.5	28.7	32.0604	0.568948	6.04881	-	XXXX	U1426A-2H-2A, 116.0cm		2
346	U1426	A	2	H	2	A	116.5	5.165	5.865		5.84507	35.7	32.7	28	31.5523	0.545566	6.00567	-	XXXX	U1426A-2H-2A, 116.5cm		2
346	U1426	A	2	H	2	A	117	5.17	5.87		5.85007	33.9	30.7	25.9	30.2999	0.667261	6.3378	-	XXXX	U1426A-2H-2A, 117.0cm		2
346	U1426	A	2	H	2	A	117.5	5.175	5.875		5.85507	34.2	30.9	26.1	30.4439	0.728002	6.33979	-	XXXX	U1426A-2H-2A, 117.5cm		2
346	U1426	A	2	H	2	A	118	5.18	5.88		5.86007	34.4	31	26	30.5144	0.730848	6.54701	-	XXXX	U1426A-2H-2A, 118.0cm		2
346	U1426	A	2	H	2	A	118.5	5.185	5.885		5.86507	34	30.6	25.7	30.2596	0.766906	6.49129	-	XXXX	U1426A-2H-2A, 118.5cm		2
346	U1426	A	2	H	2	A	119	5.19	5.89		5.87007	34	30.6	25.7	30.2596	0.766906	6.49129	-	XXXX	U1426A-2H-2A, 119.0cm		2
346	U1426	A	2	H	2	A	119.5	5.195	5.895		5.87507	33.3	30	25.2	29.8571	0.742331	6.43351	-	XXXX	U1426A-2H-2A, 119.5cm		2
346	U1426	A	2	H	2	A	120	5.2	5.9		5.88007	34.7	31.3	26.4	30.7117	0.755551	6.41854	-	XXXX	U1426A-2H-2A, 120.0cm		2
346	U1426	A	2	H	2	A	120.5	5.205	5.905		5.88507	34	30.7	25.8	30.3101	0.701411	6.45829	-	XXXX	U1426A-2H-2A, 120.5cm		2
346	U1426	A	2	H	2	A	121	5.21	5.91		5.89007	34.3	31	26.2	30.5085	0.726455	6.32964	-	XXXX	U1426A-2H-2A, 121.0cm		2
346	U1426	A	2	H	2	A	121.5	5.215	5.915		5.89507	35.1	31.8	26.9	31.0172	0.685151	6.34613	-	XXXX	U1426A-2H-2A, 121.5cm		2
346	U1426	A	2	H	2	A	122	5.22	5.92		5.90007	34.8	31.5	26.6	30.8257	0.689486	6.37611	-	XXXX	U1426A-2H-2A, 122.0cm		2
346	U1426	A	2	H	2	A	122.5	5.225	5.925		5.90507	35	31.7	26.9	30.9577	0.715869	6.26001	-	XXXX	U1426A-2H-2A, 122.5cm		2
346	U1426	A	2	H	2	A	123	5.23	5.93		5.91007	34.2	31.1	26.6	30.5572	0.687093	5.98429	-	XXXX	U1426A-2H-2A, 123.0cm		2
346	U1426	A	2	H	2	A	123.5	5.235	5.935		5.91507	35.6	32.5	27.7	31.4363	0.580621	6.13989	-	XXXX	U1426A-2H-2A, 123.5cm		2
346	U1426	A	2	H	2	A	124	5.24	5.94		5.92007	36.1	32.9	28	31.6969	0.608458	6.21832	-	XXXX	U1426A-2H-2A, 124.0cm		2
346	U1426	A	2	H	2	A	124.5	5.245	5.945		5.92507	35.7	32.5	27.7	31.4503	0.642471	6.1616	-	XXXX	U1426A-2H-2A, 124.5cm		2
346	U1426	A	2	H	2	A	125	5.25	5.95		5.93007	36.5	33.3	28.3	31.942	0.574893	6.27446	-	XXXX	U1426A-2H-2A, 125.0cm		2
346	U1426	A	2	H	2	A	125.5	5.255	5.955		5.93507	36.7	33.5	28.5	32.0659	0.572556	6.2558	-	XXXX	U1426A-2H-2A, 125.5cm		2
346	U1426	A	2	H	2	A	126	5.26	5.96		5.94007	37.3	34	28.7	32.3754	0.542185	6.50805	-	XXXX	U1426A-2H-2A, 126.0cm		2
346	U1426	A	2	H	2	A	126.5	5.265	5.965		5.94507	37.6	34.2	28.8	32.5075	0.571952	6.60225	-	XXXX	U1426A-2H-2A, 126.5cm		2
346	U1426	A	2	H	2	A	127	5.27	5.97		5.95007	38.1	34.6	29.2	32.7647	0.627047	6.58455	-	XXXX	U1426A-2H-2A, 127.0cm		2
346	U1426	A	2	H	2	A	127.5	5.275	5.975		5.95507	37.3	33.9	28.5	32.3236	0.575496	6.63169	-	XXXX	U1426A-2H-2A, 127.5cm		2
346	U1426	A	2	H	2	A	128	5.28	5.98		5.96007	36.5	33.1	27.7	31.8288	0.585235	6.71226	-	XXXX	U1426A-2H-2A, 128.0cm		2
346	U1426	A	2	H	2	A	128.5	5.285	5.985		5.96507	35.6	32.2	26.8	31.2641	0.596718	6.80665	-	XXXX	U1426A-2H-2A, 128.5cm		2
346	U1426	A	2	H	2	A	129	5.29	5.99		5.97007	34.5	31.2	25.9	30.6163	0.576099	6.79642	-	XXXX	U1426A-2H-2A, 129.0cm		2
346	U1426	A	2	H	2	A	129.5	5.295	5.995		5.97507	35	31.5	26.1	30.8331	0.669141	6.9051	-	XXXX	U1426A-2H-2A, 129.5cm		2
346	U1426	A	2	H	2	A	130	5.3	6		5.98007	34	30.5	25.2	30.1919	0.713974	6.92003	-	XXXX	U1426A-2H-2A, 130.0cm		2
346	U1426	A	2	H	2	A	130.5	5.305	6.005		5.98507	33.7	30.1	24.8	29.9451	0.785142	6.98927	-	XXXX	U1426A-2H-2A, 130.5cm		2
346	U1426	A	2	H	2	A	131	5.31	6.01		5.99007	34.2	30.4	24.8	30.1576	0.819777	7.2985	-	XXXX	U1426A-2H-2A, 131.0cm		2
346	U1426	A	2	H	2	A	131.5	5.315	6.015		5.99507	34.1	30.4	24.7	30.1388	0.725995	7.37604	-	XXXX	U1426A-2H-2A, 131.5cm		2
346	U1426	A	2	H	2	A	132	5.32	6.02		6.00007	34.9	31.1	25.3	30.6026	0.748749	7.41106	-	XXXX	U1426A-2H-2A, 132.0cm		2
346	U1426	A	2	H	2	A	132.5	5.325	6.025		6.00507	34.8	31.1	25.4	30.5924	0.71438	7.28999	-	XXXX	U1426A-2H-2A, 132.5cm		2
346	U1426	A	2	H	2	A	133	5.33	6.03		6.01007	34.1	30.4	24.9	30.1473	0.784996	7.17601	-	XXXX	U1426A-2H-2A, 133.0cm		2
346	U1426	A	2	H	2	A	133.5	5.335	6.035		6.01507	33.4	29.8	24.4	29.7436	0.760654	7.12583	-	XXXX	U1426A-2H-2A, 133.5cm		2
346	U1426	A	2	H	2	A	134	5.34	6.04		6.02007	34.1	30.5	25	30.1979	0.719035	7.14143	-	XXXX	U1426A-2H-2A, 134.0cm		2
346	U1426	A	2	H	2	A	134.5	5.345	6.045		6.02507	33.6	29.9	24.5	29.8242	0.823773	7.13643	-	XXXX	U1426A-2H-2A, 134.5cm		2
346	U1426	A	2	H	2	A	135	5.35	6.05		6.03007	34.2	30.3	24.7	30.107	0.885989	7.33349	-	XXXX	U1426A-2H-2A, 135.0cm		2
346	U1426	A	2	H	2	A	135.5	5.355	6.055		6.03507	35.4	31.5	25.8	30.8775	0.833956	7.28642	-	XXXX	U1426A-2H-2A, 135.5cm		2
346	U1426	A	2	H	2	A	136	5.36	6.06		6.04007	35.4	31.7	26	30.9767	0.7048	7.21868	-	XXXX	U1426A-2H-2A, 136.0cm		2
346	U1426	A	2	H	2	A	136.5	5.365	6.065		6.04507	34	30.3	24.5	30.0693	0.698182	7.4891	-	XXXX	U1426A-2H-2A, 136.5cm		2
346	U1426	A	2	H	2	A	137	5.37	6.07		6.05007	35.1	31.3	25.4	30.7269	0.716336	7.48511	-	XXXX	U1426A-2H-2A, 137.0cm		2
346	U1426	A	2	H	2	A	137.5	5.375	6.075		6.05507	35	31.1	25.3	30.6169	0.812232	7.43333	-	XXXX	U1426A-2H-2A, 137.5cm		2
346	U1426	A	2	H	2	A	138	5.38	6.08		6.06007	34.1	30.4	24.7	30.1388	0.725995	7.37604	-	XXXX	U1426A-2H-2A, 138.0cm		2
346	U1426	A	2	H	2	A	138.5	5.385	6.085		6.06507	34.4	30.7	25	30.3339	0.720958	7.33878	-	XXXX	U1426A-2H-2A, 138.5cm		2
346	U1426	A	2	H	2	A	139	5.39	6.09		6.07007	34.6	30.9	25.1	30.4592	0.688389	7.41348	-	XXXX	U1426A-2H-2A, 139.0cm		2
346	U1426	A	2	H	2	A	139.5	5.395	6.095		6.07507	34.9	31.2	25.5	30.6567	0.71276	7.27796	-	XXXX	U1426A-2H-2A, 139.5cm		2
346	U1426	A	2	H	2	A	140	5.4	6.1		6.08007	35.1	31.3	25.6	30.7352	0.774413	7.28816	-	XXXX	U1426A-2H-2A, 140.0cm		2
346	U1426	A	2	H	2	A	140.5	5.405	6.105		6.08507	35.3	31.5	26	30.8716	0.828978	7.06888	-	XXXX	U1426A-2H-2A, 140.5cm		2
346	U1426	A	2	H	2	A	141	5.41	6.11		6.09007	35.1	31.3	25.8	30.7436	0.832567	7.09192	-	XXXX	U1426A-2H-2A, 141.0cm		2
346	U1426	A	2	H	2	A	141.5	5.415	6.115		6.09507	34.5	30.9	25.5	30.4616	0.74189	6.99531	-	XXXX	U1426A-2H-2A, 141.5cm		2
346	U1426	A	2	H	2	A	142	5.42	6.12		6.10007	33.9	30.3	25	30.076	0.781614	6.96579	-	XXXX	U1426A-2H-2A, 142.0cm		2
346	U1426	A	2	H	2	A	142.5	5.425	6.125		6.10507	34.3	30.7	25.4	30.3364	0.774682	6.91956	-	XXXX	U1426A-2H-2A, 142.5cm		2
346	U1426	A	2	H	2	A	143	5.43	6.13		6.11007	34.5	30.8	25.4	30.4114	0.807322	7.02927	-	XXXX	U1426A-2H-2A, 143.0cm		2
346	U1426	A	2	H	2	A	143.5	5.435	6.135		6.11507	34.8	31.2	26	30.6634	0.795519	6.76538	-	XXXX	U1426A-2H-2A, 143.5cm		2
346	U1426	A	2	H	2	A	144	5.44	6.14		6.12007	34.5	30.9	25.4	30.4574	0.712524	7.094	-	XXXX	U1426A-2H-2A, 144.0cm		2
346	U1426	A	2	H	2	A	144.5	5.445	6.145		6.12507	34.5	30.7	25.2	30.3568	0.843583	7.16247	-	XXXX	U1426A-2H-2A, 144.5cm		2
346	U1426	A	2	H	2	A	145	5.45	6.15		6.13007	33.6	29.9	24.6	29.8285	0.853539	7.03579	-	XXXX	U1426A-2H-2A, 145.0cm		2
346	U1426	A	2	H	2	A	145.5	5.455	6.155		6.13507	33.5	29.8	24.6	29.7669	0.885296	6.94712	-	XXXX	U1426A-2H-2A, 145.5cm		2
346	U1426	A	2	H	2	A	146	5.46	6.16		6.14007	34	30.1	24.4	29.972	0.860479	7.45928	-	XXXX	U1426A-2H-2A, 146.0cm		2
346	U1426	A	2	H	2	A	146.5	5.465	6.165		6.14507	34.7	30.8	24.9	30.4192	0.788554	7.57031	-	XXXX	U1426A-2H-2A, 146.5cm		2
346	U1426	A	2	H	2	A	147	5.47	6.17		6.15007	35	31.2	25.4	30.6669	0.747052	7.39877	-	XXXX	U1426A-2H-2A, 147.0cm		2
346	U1426	A	2	H	2	A	147.5	5.475	6.175		6.15507	35.3	31.6	25.7	30.9046	0.648446	7.42613	-	XXXX	U1426A-2H-2A, 147.5cm		2
346	U1426	A	2	H	2	A	148	5.48	6.18		6.16007	34.9	31.3	25.8	30.715	0.706165	7.04754	-	XXXX	U1426A-2H-2A, 148.0cm		2
346	U1426	A	2	H	2	A	148.5	5.485	6.185		6.16507	34.3	30.8	25.4	30.3825	0.679706	6.98448	-	XXXX	U1426A-2H-2A, 148.5cm		2
346	U1426	A	2	H	2	A	149	5.49	6.19		6.17007	34.7	31.3	26.6	30.7202	0.814376	6.22502	-	XXXX	U1426A-2H-2A, 149.0cm		2
346	U1426	A	2	H	2	A	149.5	5.495	6.195		6.17507	18.6	16.7	13.3	19.4896	0.389825	6.2345	-	XXXX	U1426A-2H-2A, 149.5cm		2
346	U1426	A	2	H	3	A	0	5.5	6.2		6.18007	24.2	21.6	17.4	23.7383	0.588271	6.66892	-	XXXX	U1426A-2H-3A, 0.0cm	sub_sample_width 1.5 cm, median_filter_rank 0, data_decimate 100	2
346	U1426	A	2	H	3	A	0.5	5.505	6.205		6.18507	19.2	17.4	13.9	20.0971	0.249034	6.21774	-	XXXX	U1426A-2H-3A, 0.5cm		2
346	U1426	A	2	H	3	A	1	5.51	6.21		6.19007	31.7	28.3	23	28.7145	0.684857	7.16544	-	XXXX	U1426A-2H-3A, 1.0cm		2
346	U1426	A	2	H	3	A	1.5	5.515	6.215		6.19507	32.9	29.3	23.8	29.408	0.739542	7.28991	-	XXXX	U1426A-2H-3A, 1.5cm		2
346	U1426	A	2	H	3	A	2	5.52	6.22		6.20007	32.4	28.9	23.5	29.1301	0.710731	7.21527	-	XXXX	U1426A-2H-3A, 2.0cm		2
346	U1426	A	2	H	3	A	2.5	5.525	6.225		6.20507	32.1	28.7	23.5	28.9894	0.708592	7.0111	-	XXXX	U1426A-2H-3A, 2.5cm		2
346	U1426	A	2	H	3	A	3	5.53	6.23		6.21007	31.8	28.4	23.3	28.7911	0.744429	6.94495	-	XXXX	U1426A-2H-3A, 3.0cm		2
346	U1426	A	2	H	3	A	3.5	5.535	6.235		6.21507	31.5	28.1	23	28.5873	0.749862	6.98242	-	XXXX	U1426A-2H-3A, 3.5cm		2
346	U1426	A	2	H	3	A	4	5.54	6.24		6.22007	31.2	27.8	22.6	28.3778	0.724463	7.12569	-	XXXX	U1426A-2H-3A, 4.0cm		2
346	U1426	A	2	H	3	A	4.5	5.545	6.245		6.22507	31.3	27.9	23	28.4596	0.815389	6.79856	-	XXXX	U1426A-2H-3A, 4.5cm		2
346	U1426	A	2	H	3	A	5	5.55	6.25		6.23007	31.4	27.9	22.8	28.466	0.821048	7.03146	-	XXXX	U1426A-2H-3A, 5.0cm		2
346	U1426	A	2	H	3	A	5.5	5.555	6.255		6.23507	31.1	27.6	22.5	28.2602	0.827083	7.07017	-	XXXX	U1426A-2H-3A, 5.5cm		2
346	U1426	A	2	H	3	A	6	5.56	6.26		6.24007	31.5	28	23.1	28.5432	0.8807	6.81001	-	XXXX	U1426A-2H-3A, 6.0cm		2
346	U1426	A	2	H	3	A	6.5	5.565	6.265		6.24507	31.8	28.4	23.5	28.8	0.805794	6.73816	-	XXXX	U1426A-2H-3A, 6.5cm		2
346	U1426	A	2	H	3	A	7	5.57	6.27		6.25007	32.6	29	23.7	29.2165	0.805328	7.12302	-	XXXX	U1426A-2H-3A, 7.0cm		2
346	U1426	A	2	H	3	A	7.5	5.575	6.275		6.25507	32.8	29.2	24.1	29.3588	0.861876	6.89426	-	XXXX	U1426A-2H-3A, 7.5cm		2
346	U1426	A	2	H	3	A	8	5.58	6.28		6.26007	32.5	29.1	24.1	29.2666	0.762491	6.75808	-	XXXX	U1426A-2H-3A, 8.0cm		2
346	U1426	A	2	H	3	A	8.5	5.585	6.285		6.26507	32.2	28.7	23.6	29.0089	0.805513	6.93143	-	XXXX	U1426A-2H-3A, 8.5cm		2
346	U1426	A	2	H	3	A	9	5.59	6.29		6.27007	32.6	28.9	23.6	29.1645	0.873342	7.15882	-	XXXX	U1426A-2H-3A, 9.0cm		2
346	U1426	A	2	H	3	A	9.5	5.595	6.295		6.27507	32.1	28.5	23.2	28.8802	0.814967	7.18655	-	XXXX	U1426A-2H-3A, 9.5cm		2
346	U1426	A	2	H	3	A	10	5.6	6.3		6.28007	31.5	28	23	28.5388	0.84987	6.91425	-	XXXX	U1426A-2H-3A, 10.0cm		2
346	U1426	A	2	H	3	A	10.5	5.605	6.305		6.28507	31.4	28.1	23.3	28.5854	0.775238	6.64678	-	XXXX	U1426A-2H-3A, 10.5cm		2
346	U1426	A	2	H	3	A	11	5.61	6.31		6.29007	32.4	29	24.2	29.2085	0.825099	6.56618	-	XXXX	U1426A-2H-3A, 11.0cm		2
346	U1426	A	2	H	3	A	11.5	5.615	6.315		6.29507	32.1	28.7	23.8	29.0026	0.800179	6.70273	-	XXXX	U1426A-2H-3A, 11.5cm		2
346	U1426	A	2	H	3	A	12	5.62	6.32		6.30007	32.7	29.3	24.3	29.4	0.758988	6.73484	-	XXXX	U1426A-2H-3A, 12.0cm		2
346	U1426	A	2	H	3	A	12.5	5.625	6.325		6.30507	32.9	29.5	24.6	29.5373	0.785706	6.61107	-	XXXX	U1426A-2H-3A, 12.5cm		2
346	U1426	A	2	H	3	A	13	5.63	6.33		6.31007	33	29.6	24.6	29.5992	0.753813	6.70045	-	XXXX	U1426A-2H-3A, 13.0cm		2
346	U1426	A	2	H	3	A	13.5	5.635	6.335		6.31507	32.8	29.3	24.1	29.4062	0.764185	6.9609	-	XXXX	U1426A-2H-3A, 13.5cm		2
346	U1426	A	2	H	3	A	14	5.64	6.34		6.32007	33.1	29.5	24.3	29.5539	0.825999	6.95989	-	XXXX	U1426A-2H-3A, 14.0cm		2
346	U1426	A	2	H	3	A	14.5	5.645	6.345		6.32507	32.8	29.3	24.1	29.4062	0.764185	6.9609	-	XXXX	U1426A-2H-3A, 14.5cm		2
346	U1426	A	2	H	3	A	15	5.65	6.35		6.33007	32.8	29.3	24.2	29.4105	0.794362	6.8593	-	XXXX	U1426A-2H-3A, 15.0cm		2
346	U1426	A	2	H	3	A	15.5	5.655	6.355		6.33507	32.9	29.4	24.2	29.4727	0.762412	6.94889	-	XXXX	U1426A-2H-3A, 15.5cm		2
346	U1426	A	2	H	3	A	16	5.66	6.36		6.34007	32.6	29.1	24.1	29.2815	0.828323	6.78122	-	XXXX	U1426A-2H-3A, 16.0cm		2
346	U1426	A	2	H	3	A	16.5	5.665	6.365		6.34507	32.4	28.9	23.6	29.1345	0.741049	7.11236	-	XXXX	U1426A-2H-3A, 16.5cm		2
346	U1426	A	2	H	3	A	17	5.67	6.37		6.35007	32.5	29	24	29.2146	0.830221	6.79298	-	XXXX	U1426A-2H-3A, 17.0cm		2
346	U1426	A	2	H	3	A	17.5	5.675	6.375		6.35507	31.9	28.6	23.9	28.929	0.796896	6.48605	-	XXXX	U1426A-2H-3A, 17.5cm		2
346	U1426	A	2	H	3	A	18	5.68	6.38		6.36007	32.1	28.7	24	29.0114	0.861344	6.49815	-	XXXX	U1426A-2H-3A, 18.0cm		2
346	U1426	A	2	H	3	A	18.5	5.685	6.385		6.36507	31.9	28.5	23.7	28.8721	0.834577	6.62343	-	XXXX	U1426A-2H-3A, 18.5cm		2
346	U1426	A	2	H	3	A	19	5.69	6.39		6.37007	32.3	28.8	23.8	29.0805	0.834054	6.81669	-	XXXX	U1426A-2H-3A, 19.0cm		2
346	U1426	A	2	H	3	A	19.5	5.695	6.395		6.37507	32.9	29.4	24.2	29.4727	0.762412	6.94889	-	XXXX	U1426A-2H-3A, 19.5cm		2
346	U1426	A	2	H	3	A	20	5.7	6.4		6.38007	32.9	29.4	24.4	29.4814	0.822696	6.74632	-	XXXX	U1426A-2H-3A, 20.0cm		2
346	U1426	A	2	H	3	A	20.5	5.705	6.405		6.38507	32	28.6	23.7	28.9352	0.802039	6.71448	-	XXXX	U1426A-2H-3A, 20.5cm		2
346	U1426	A	2	H	3	A	21	5.71	6.41		6.39007	30.7	27.4	22.7	28.1094	0.819668	6.62593	-	XXXX	U1426A-2H-3A, 21.0cm		2
346	U1426	A	2	H	3	A	21.5	5.715	6.415		6.39507	32.3	28.9	24	29.1371	0.796494	6.67944	-	XXXX	U1426A-2H-3A, 21.5cm		2
346	U1426	A	2	H	3	A	22	5.72	6.42		6.40007	32.4	28.8	23.7	29.0911	0.869833	6.94253	-	XXXX	U1426A-2H-3A, 22.0cm		2
346	U1426	A	2	H	3	A	22.5	5.725	6.425		6.40507	32.3	28.9	24	29.1371	0.796494	6.67944	-	XXXX	U1426A-2H-3A, 22.5cm		2
346	U1426	A	2	H	3	A	23	5.73	6.43		6.41007	34.9	31.1	25.5	30.611	0.807028	7.21364	-	XXXX	U1426A-2H-3A, 23.0cm		2
346	U1426	A	2	H	3	A	23.5	5.735	6.435		6.41507	35.8	32	26.3	31.1814	0.762593	7.20573	-	XXXX	U1426A-2H-3A, 23.5cm		2
346	U1426	A	2	H	3	A	24	5.74	6.44		6.42007	34.7	31.1	25.6	30.5864	0.709326	7.07065	-	XXXX	U1426A-2H-3A, 24.0cm		2
346	U1426	A	2	H	3	A	24.5	5.745	6.445		6.42507	34	30.7	25.6	30.3015	0.642044	6.65492	-	XXXX	U1426A-2H-3A, 24.5cm		2
346	U1426	A	2	H	3	A	25	5.75	6.45		6.43007	36.9	33.8	28.6	32.2293	0.451597	6.39213	-	XXXX	U1426A-2H-3A, 25.0cm		2
346	U1426	A	2	H	3	A	25.5	5.755	6.455		6.43507	38.3	35.3	29.9	33.1209	0.322731	6.41487	-	XXXX	U1426A-2H-3A, 25.5cm		2
346	U1426	A	2	H	3	A	26	5.76	6.46		6.44007	39.5	36.3	30.8	33.7402	0.404836	6.4551	-	XXXX	U1426A-2H-3A, 26.0cm		2
346	U1426	A	2	H	3	A	26.5	5.765	6.465		6.44507	40.3	37	31.2	34.1536	0.375263	6.67784	-	XXXX	U1426A-2H-3A, 26.5cm		2
346	U1426	A	2	H	3	A	27	5.77	6.47		6.45007	40.9	37.6	31.7	34.4996	0.343674	6.71084	-	XXXX	U1426A-2H-3A, 27.0cm		2
346	U1426	A	2	H	3	A	27.5	5.775	6.475		6.45507	40.9	37.6	31.4	34.4881	0.262994	6.97419	-	XXXX	U1426A-2H-3A, 27.5cm		2
346	U1426	A	2	H	3	A	28	5.78	6.48		6.46007	41	37.7	31.4	34.5423	0.235529	7.05252	-	XXXX	U1426A-2H-3A, 28.0cm		2
346	U1426	A	2	H	3	A	28.5	5.785	6.485		6.46507	39.3	36.1	30.6	33.6216	0.406506	6.47313	-	XXXX	U1426A-2H-3A, 28.5cm		2
346	U1426	A	2	H	3	A	29	5.79	6.49		6.47007	38.9	35.7	30.4	33.3912	0.465255	6.32993	-	XXXX	U1426A-2H-3A, 29.0cm		2
346	U1426	A	2	H	3	A	29.5	5.795	6.495		6.47507	38.9	35.8	30.5	33.4377	0.405652	6.30054	-	XXXX	U1426A-2H-3A, 29.5cm		2
346	U1426	A	2	H	3	A	30	5.8	6.5		6.48007	38.7	35.5	30	33.2636	0.411622	6.52816	-	XXXX	U1426A-2H-3A, 30.0cm		2
346	U1426	A	2	H	3	A	30.5	5.805	6.505		6.48507	37.6	34.3	28.9	32.555	0.510691	6.57148	-	XXXX	U1426A-2H-3A, 30.5cm		2
346	U1426	A	2	H	3	A	31	5.81	6.51		6.49007	37.8	34.7	29.3	32.7716	0.386946	6.49136	-	XXXX	U1426A-2H-3A, 31.0cm		2
346	U1426	A	2	H	3	A	31.5	5.815	6.515		6.49507	38.2	35	29.6	32.9667	0.443937	6.48406	-	XXXX	U1426A-2H-3A, 31.5cm		2
346	U1426	A	2	H	3	A	32	5.82	6.52		6.50007	38.4	35.1	29.6	33.0364	0.474508	6.58642	-	XXXX	U1426A-2H-3A, 32.0cm		2
346	U1426	A	2	H	3	A	32.5	5.825	6.525		6.50507	38.9	35.6	30	33.3328	0.442001	6.62971	-	XXXX	U1426A-2H-3A, 32.5cm		2
346	U1426	A	2	H	3	A	33	5.83	6.53		6.51007	40.1	36.7	30.9	33.9905	0.435578	6.72585	-	XXXX	U1426A-2H-3A, 33.0cm		2
346	U1426	A	2	H	3	A	33.5	5.835	6.535		6.51507	39.3	35.9	30.1	33.5171	0.442884	6.80195	-	XXXX	U1426A-2H-3A, 33.5cm		2
346	U1426	A	2	H	3	A	34	5.84	6.54		6.52007	39.7	36.3	30.6	33.7585	0.466531	6.67419	-	XXXX	U1426A-2H-3A, 34.0cm		2
346	U1426	A	2	H	3	A	34.5	5.845	6.545		6.52507	40.6	37.3	31.3	34.3212	0.318883	6.82648	-	XXXX	U1426A-2H-3A, 34.5cm		2
346	U1426	A	2	H	3	A	35	5.85	6.55		6.53007	39.8	36.5	30.7	33.8597	0.379265	6.72433	-	XXXX	U1426A-2H-3A, 35.0cm		2
346	U1426	A	2	H	3	A	35.5	5.855	6.555		6.53507	39.5	36.1	30.3	33.636	0.441029	6.78268	-	XXXX	U1426A-2H-3A, 35.5cm		2
346	U1426	A	2	H	3	A	36	5.86	6.56		6.54007	39.6	36.2	30.4	33.6953	0.440108	6.7731	-	XXXX	U1426A-2H-3A, 36.0cm		2
346	U1426	A	2	H	3	A	36.5	5.865	6.565		6.54507	39.5	36.1	30.3	33.636	0.441029	6.78268	-	XXXX	U1426A-2H-3A, 36.5cm		2
346	U1426	A	2	H	3	A	37	5.87	6.57		6.55007	38.7	35.3	29.6	33.1622	0.47626	6.76979	-	XXXX	U1426A-2H-3A, 37.0cm		2
346	U1426	A	2	H	3	A	37.5	5.875	6.575		6.55507	38.5	35.1	29.5	33.0458	0.506046	6.69823	-	XXXX	U1426A-2H-3A, 37.5cm		2
346	U1426	A	2	H	3	A	38	5.88	6.58		6.56007	38.9	35.4	29.6	33.2316	0.506715	6.87153	-	XXXX	U1426A-2H-3A, 38.0cm		2
346	U1426	A	2	H	3	A	38.5	5.885	6.585		6.56507	37.8	34.2	28.4	32.5185	0.580037	7.01501	-	XXXX	U1426A-2H-3A, 38.5cm		2
346	U1426	A	2	H	3	A	39	5.89	6.59		6.57007	37.7	34.2	28.4	32.5049	0.519785	6.99393	-	XXXX	U1426A-2H-3A, 39.0cm		2
346	U1426	A	2	H	3	A	39.5	5.895	6.595		6.57507	36.8	33.1	27.1	31.8458	0.598589	7.34541	-	XXXX	U1426A-2H-3A, 39.5cm		2
346	U1426	A	2	H	3	A	40	5.9	6.6		6.58007	35.5	31.8	26.1	31.0403	0.703236	7.207	-	XXXX	U1426A-2H-3A, 40.0cm		2
346	U1426	A	2	H	3	A	40.5	5.905	6.605		6.58507	36	32.4	26.8	31.4101	0.66068	7.02038	-	XXXX	U1426A-2H-3A, 40.5cm		2
346	U1426	A	2	H	3	A	41	5.91	6.61		6.59007	35.7	32.1	26.4	31.2165	0.636189	7.15045	-	XXXX	U1426A-2H-3A, 41.0cm		2
346	U1426	A	2	H	3	A	41.5	5.915	6.615		6.59507	37.1	33.5	27.9	32.0963	0.645358	6.90175	-	XXXX	U1426A-2H-3A, 41.5cm		2
346	U1426	A	2	H	3	A	42	5.92	6.62		6.60007	38.4	34.9	29	32.9265	0.484279	7.01354	-	XXXX	U1426A-2H-3A, 42.0cm		2
346	U1426	A	2	H	3	A	42.5	5.925	6.625		6.60507	39.7	36.4	30.4	33.7928	0.325437	6.91261	-	XXXX	U1426A-2H-3A, 42.5cm		2
346	U1426	A	2	H	3	A	43	5.93	6.63		6.61007	40	36.8	30.9	34.0194	0.291741	6.76486	-	XXXX	U1426A-2H-3A, 43.0cm		2
346	U1426	A	2	H	3	A	43.5	5.935	6.635		6.61507	40.5	37.3	31.6	34.3199	0.342554	6.54252	-	XXXX	U1426A-2H-3A, 43.5cm		2
346	U1426	A	2	H	3	A	44	5.94	6.64		6.62007	41.3	38	32.1	34.7311	0.340771	6.67466	-	XXXX	U1426A-2H-3A, 44.0cm		2
346	U1426	A	2	H	3	A	44.5	5.945	6.645		6.62507	41.3	38	32.1	34.7311	0.340771	6.67466	-	XXXX	U1426A-2H-3A, 44.5cm		2
346	U1426	A	2	H	3	A	45	5.95	6.65		6.63007	41	37.7	31.9	34.5615	0.36983	6.61437	-	XXXX	U1426A-2H-3A, 45.0cm		2
346	U1426	A	2	H	3	A	45.5	5.955	6.655		6.63507	40.8	37.5	31.9	34.4531	0.425309	6.45735	-	XXXX	U1426A-2H-3A, 45.5cm		2
346	U1426	A	2	H	3	A	46	5.96	6.66		6.64007	40.9	37.7	32	34.5525	0.339695	6.5072	-	XXXX	U1426A-2H-3A, 46.0cm		2
346	U1426	A	2	H	3	A	46.5	5.965	6.665		6.64507	39.9	36.8	31.7	34.0377	0.452278	6.03844	-	XXXX	U1426A-2H-3A, 46.5cm		2
346	U1426	A	2	H	3	A	47	5.97	6.67		6.65007	39.7	36.6	31.6	33.924	0.481445	5.96681	-	XXXX	U1426A-2H-3A, 47.0cm		2
346	U1426	A	2	H	3	A	47.5	5.975	6.675		6.65507	39.6	36.6	31.5	33.907	0.396104	6.03454	-	XXXX	U1426A-2H-3A, 47.5cm		2
346	U1426	A	2	H	3	A	48	5.98	6.68		6.66007	40.6	37.5	32.1	34.4352	0.365058	6.24294	-	XXXX	U1426A-2H-3A, 48.0cm		2
346	U1426	A	2	H	3	A	48.5	5.985	6.685		6.66507	39.4	36.3	31.1	33.7389	0.429083	6.1682	-	XXXX	U1426A-2H-3A, 48.5cm		2
346	U1426	A	2	H	3	A	49	5.99	6.69		6.67007	36.6	33.5	28.8	32.0645	0.597597	5.9562	-	XXXX	U1426A-2H-3A, 49.0cm		2
346	U1426	A	2	H	3	A	49.5	5.995	6.695		6.67507	36.8	33.7	28.7	32.1758	0.509593	6.21606	-	XXXX	U1426A-2H-3A, 49.5cm		2
346	U1426	A	2	H	3	A	50	6	6.7		6.68007	36.6	33.5	28.5	32.0522	0.511696	6.23447	-	XXXX	U1426A-2H-3A, 50.0cm		2
346	U1426	A	2	H	3	A	50.5	6.005	6.705		6.68507	37.3	34	29.3	32.3998	0.712161	5.9554	-	XXXX	U1426A-2H-3A, 50.5cm		2
346	U1426	A	2	H	3	A	51	6.01	6.71		6.69007	37.6	34.2	29.1	32.5196	0.65647	6.32585	-	XXXX	U1426A-2H-3A, 51.0cm		2
346	U1426	A	2	H	3	A	51.5	6.015	6.715		6.69507	34.9	31.5	26.2	30.8231	0.635293	6.7857	-	XXXX	U1426A-2H-3A, 51.5cm		2
346	U1426	A	2	H	3	A	52	6.02	6.72		6.70007	35.9	32.6	27.7	31.5229	0.673939	6.2683	-	XXXX	U1426A-2H-3A, 52.0cm		2
346	U1426	A	2	H	3	A	52.5	6.025	6.725		6.70507	35.1	31.7	26.5	30.955	0.661664	6.66728	-	XXXX	U1426A-2H-3A, 52.5cm		2
346	U1426	A	2	H	3	A	53	6.03	6.73		6.71007	36	32.4	27	31.4183	0.718167	6.82881	-	XXXX	U1426A-2H-3A, 53.0cm		2
346	U1426	A	2	H	3	A	53.5	6.035	6.735		6.71507	33.9	30.4	25.2	30.131	0.745258	6.83219	-	XXXX	U1426A-2H-3A, 53.5cm		2
346	U1426	A	2	H	3	A	54	6.04	6.74		6.72007	33	29.7	24.6	29.6463	0.65686	6.76677	-	XXXX	U1426A-2H-3A, 54.0cm		2
346	U1426	A	2	H	3	A	54.5	6.045	6.745		6.72507	34.7	31.4	26.2	30.749	0.602829	6.67716	-	XXXX	U1426A-2H-3A, 54.5cm		2
346	U1426	A	2	H	3	A	55	6.05	6.75		6.73007	33.2	29.8	24.3	29.7098	0.600501	7.18125	-	XXXX	U1426A-2H-3A, 55.0cm		2
346	U1426	A	2	H	3	A	55.5	6.055	6.755		6.73507	32.3	29	23.7	29.1716	0.606962	7.05348	-	XXXX	U1426A-2H-3A, 55.5cm		2
346	U1426	A	2	H	3	A	56	6.06	6.76		6.74007	33.5	30.2	24.9	29.9668	0.589609	6.90956	-	XXXX	U1426A-2H-3A, 56.0cm		2
346	U1426	A	2	H	3	A	56.5	6.065	6.765		6.74507	34	30.7	25.4	30.293	0.582752	6.85226	-	XXXX	U1426A-2H-3A, 56.5cm		2
346	U1426	A	2	H	3	A	57	6.07	6.77		6.75007	34.4	31	25.5	30.4932	0.583557	7.03769	-	XXXX	U1426A-2H-3A, 57.0cm		2
346	U1426	A	2	H	3	A	57.5	6.075	6.775		6.75507	33.2	29.7	24.3	29.6628	0.697224	7.11521	-	XXXX	U1426A-2H-3A, 57.5cm		2
346	U1426	A	2	H	3	A	58	6.08	6.78		6.76007	30.4	27.2	22	27.9328	0.598218	7.15738	-	XXXX	U1426A-2H-3A, 58.0cm		2
346	U1426	A	2	H	3	A	58.5	6.085	6.785		6.76507	30.3	27.3	22.7	27.9984	0.6481	6.46066	-	XXXX	U1426A-2H-3A, 58.5cm		2
346	U1426	A	2	H	3	A	59	6.09	6.79		6.77007	29.7	26.9	22.7	27.707	0.644111	6.03643	-	XXXX	U1426A-2H-3A, 59.0cm		2
346	U1426	A	2	H	3	A	59.5	6.095	6.795		6.77507	30	27.1	22.5	27.8439	0.582575	6.46017	-	XXXX	U1426A-2H-3A, 59.5cm		2
346	U1426	A	2	H	3	A	60	6.1	6.8		6.78007	31.3	28.2	23.5	28.6276	0.670189	6.4845	-	XXXX	U1426A-2H-3A, 60.0cm		2
346	U1426	A	2	H	3	A	60.5	6.105	6.805		6.78507	31.7	28.5	23.8	28.8463	0.73212	6.47393	-	XXXX	U1426A-2H-3A, 60.5cm		2
346	U1426	A	2	H	3	A	61	6.11	6.81		6.79007	31.7	28.5	23.8	28.8463	0.73212	6.47393	-	XXXX	U1426A-2H-3A, 61.0cm		2
346	U1426	A	2	H	3	A	61.5	6.115	6.815		6.79507	31.6	28.3	23.3	28.7126	0.709975	6.83012	-	XXXX	U1426A-2H-3A, 61.5cm		2
346	U1426	A	2	H	3	A	62	6.12	6.82		6.80007	31.4	28.1	23	28.5721	0.682559	6.95881	-	XXXX	U1426A-2H-3A, 62.0cm		2
346	U1426	A	2	H	3	A	62.5	6.125	6.825		6.80507	32	28.6	23.6	28.9308	0.771441	6.8173	-	XXXX	U1426A-2H-3A, 62.5cm		2
346	U1426	A	2	H	3	A	63	6.13	6.83		6.81007	32.6	29.1	24	29.2772	0.798033	6.88308	-	XXXX	U1426A-2H-3A, 63.0cm		2
346	U1426	A	2	H	3	A	63.5	6.135	6.835		6.81507	32.3	28.8	23.8	29.0805	0.834054	6.81669	-	XXXX	U1426A-2H-3A, 63.5cm		2
346	U1426	A	2	H	3	A	64	6.14	6.84		6.82007	32.1	28.5	23.3	28.8846	0.845438	7.08289	-	XXXX	U1426A-2H-3A, 64.0cm		2
346	U1426	A	2	H	3	A	64.5	6.145	6.845		6.82507	31.4	27.9	22.9	28.4705	0.851904	6.92676	-	XXXX	U1426A-2H-3A, 64.5cm		2
346	U1426	A	2	H	3	A	65	6.15	6.85		6.83007	32.3	29	24.2	29.1935	0.759173	6.54299	-	XXXX	U1426A-2H-3A, 65.0cm		2
346	U1426	A	2	H	3	A	65.5	6.155	6.855		6.83507	31.6	28.4	23.8	28.7831	0.764696	6.38255	-	XXXX	U1426A-2H-3A, 65.5cm		2
346	U1426	A	2	H	3	A	66	6.16	6.86		6.84007	31.2	28.2	23.8	28.6258	0.696319	6.15204	-	XXXX	U1426A-2H-3A, 66.0cm		2
346	U1426	A	2	H	3	A	66.5	6.165	6.865		6.84507	33.1	30.3	26	30.0027	0.566063	5.79701	-	XXXX	U1426A-2H-3A, 66.5cm		2
346	U1426	A	2	H	3	A	67	6.17	6.87		6.85007	34.7	32	27.8	31.0893	0.513429	5.52991	-	XXXX	U1426A-2H-3A, 67.0cm		2
346	U1426	A	2	H	3	A	67.5	6.175	6.875		6.85507	35.4	32.6	28.4	31.4826	0.569	5.50263	-	XXXX	U1426A-2H-3A, 67.5cm		2
346	U1426	A	2	H	3	A	68	6.18	6.88		6.86007	36.6	33.8	29.5	32.2253	0.527304	5.49967	-	XXXX	U1426A-2H-3A, 68.0cm		2
346	U1426	A	2	H	3	A	68.5	6.185	6.885		6.86507	37.2	34.3	30	32.5457	0.582232	5.48207	-	XXXX	U1426A-2H-3A, 68.5cm		2
346	U1426	A	2	H	3	A	69	6.19	6.89		6.87007	37.1	34.2	29.8	32.4804	0.5548	5.5806	-	XXXX	U1426A-2H-3A, 69.0cm		2
346	U1426	A	2	H	3	A	69.5	6.195	6.895		6.87507	37	34	29.6	32.3714	0.617099	5.61757	-	XXXX	U1426A-2H-3A, 69.5cm		2
346	U1426	A	2	H	3	A	70	6.2	6.9		6.88007	37.2	34.3	29.8	32.5375	0.525291	5.66355	-	XXXX	U1426A-2H-3A, 70.0cm		2
346	U1426	A	2	H	3	A	70.5	6.205	6.905		6.88507	36.6	33.7	29.3	32.1731	0.56011	5.62043	-	XXXX	U1426A-2H-3A, 70.5cm		2
346	U1426	A	2	H	3	A	71	6.21	6.91		6.89007	35.4	32.6	28.5	31.4868	0.598245	5.40935	-	XXXX	U1426A-2H-3A, 71.0cm		2
346	U1426	A	2	H	3	A	71.5	6.215	6.915		6.89507	34.3	31.4	27.5	30.7473	0.735015	5.33859	-	XXXX	U1426A-2H-3A, 71.5cm		2
346	U1426	A	2	H	3	A	72	6.22	6.92		6.90007	34.6	31.8	27.8	30.9846	0.637306	5.3792	-	XXXX	U1426A-2H-3A, 72.0cm		2
346	U1426	A	2	H	3	A	72.5	6.225	6.925		6.90507	35.3	32.5	28.4	31.4238	0.599405	5.41727	-	XXXX	U1426A-2H-3A, 72.5cm		2
346	U1426	A	2	H	3	A	73	6.23	6.93		6.91007	35	32.2	28	31.2302	0.573505	5.53526	-	XXXX	U1426A-2H-3A, 73.0cm		2
346	U1426	A	2	H	3	A	73.5	6.235	6.935		6.91507	35.8	33	28.7	31.729	0.535527	5.56334	-	XXXX	U1426A-2H-3A, 73.5cm		2
346	U1426	A	2	H	3	A	74	6.24	6.94		6.92007	36.2	33.4	29	31.9738	0.502491	5.6234	-	XXXX	U1426A-2H-3A, 74.0cm		2
346	U1426	A	2	H	3	A	74.5	6.245	6.945		6.92507	37	34.2	29.6	32.4587	0.437685	5.74162	-	XXXX	U1426A-2H-3A, 74.5cm		2
346	U1426	A	2	H	3	A	75	6.25	6.95		6.93007	36.4	33.6	29.2	32.0977	0.500528	5.60721	-	XXXX	U1426A-2H-3A, 75.0cm		2
346	U1426	A	2	H	3	A	75.5	6.255	6.955		6.93507	36.2	33.4	29	31.9738	0.502491	5.6234	-	XXXX	U1426A-2H-3A, 75.5cm		2
346	U1426	A	2	H	3	A	76	6.26	6.96		6.94007	36.2	33.3	28.8	31.9213	0.535593	5.74546	-	XXXX	U1426A-2H-3A, 76.0cm		2
346	U1426	A	2	H	3	A	76.5	6.265	6.965		6.94507	36	33.1	28.6	31.7969	0.537719	5.76229	-	XXXX	U1426A-2H-3A, 76.5cm		2
346	U1426	A	2	H	3	A	77	6.27	6.97		6.95007	35.5	32.5	28.2	31.4433	0.66438	5.64777	-	XXXX	U1426A-2H-3A, 77.0cm		2
346	U1426	A	2	H	3	A	77.5	6.275	6.975		6.95507	35.2	32.2	28	31.2582	0.697613	5.57892	-	XXXX	U1426A-2H-3A, 77.5cm		2
346	U1426	A	2	H	3	A	78	6.28	6.98		6.96007	35.3	32.4	28.1	31.3663	0.603832	5.63441	-	XXXX	U1426A-2H-3A, 78.0cm		2
346	U1426	A	2	H	3	A	78.5	6.285	6.985		6.96507	35	32.2	27.9	31.226	0.544105	5.62942	-	XXXX	U1426A-2H-3A, 78.5cm		2
346	U1426	A	2	H	3	A	79	6.29	6.99		6.97007	36.4	33.7	29.4	32.15	0.467747	5.48625	-	XXXX	U1426A-2H-3A, 79.0cm		2
346	U1426	A	2	H	3	A	79.5	6.295	6.995		6.97507	37.2	34.5	30.1	32.6367	0.432151	5.51518	-	XXXX	U1426A-2H-3A, 79.5cm		2
346	U1426	A	2	H	3	A	80	6.3	7		6.98007	37.9	35.2	30.6	33.0529	0.370053	5.64093	-	XXXX	U1426A-2H-3A, 80.0cm		2
346	U1426	A	2	H	3	A	80.5	6.305	7.005		6.98507	39.1	36.5	31.6	33.8038	0.219795	5.78542	-	XXXX	U1426A-2H-3A, 80.5cm		2
346	U1426	A	2	H	3	A	81	6.31	7.01		6.99007	39.3	36.6	31.6	33.8719	0.249721	5.88577	-	XXXX	U1426A-2H-3A, 81.0cm		2
346	U1426	A	2	H	3	A	81.5	6.315	7.015		6.99507	39.1	36.4	31.5	33.7577	0.278474	5.81354	-	XXXX	U1426A-2H-3A, 81.5cm		2
346	U1426	A	2	H	3	A	82	6.32	7.02		7.00007	38.8	36.1	31.3	33.5837	0.308015	5.74876	-	XXXX	U1426A-2H-3A, 82.0cm		2
346	U1426	A	2	H	3	A	82.5	6.325	7.025		7.00507	39.3	36.7	31.7	33.9179	0.191232	5.85762	-	XXXX	U1426A-2H-3A, 82.5cm		2
346	U1426	A	2	H	3	A	83	6.33	7.03		7.01007	39.6	36.9	31.9	34.0486	0.248136	5.8621	-	XXXX	U1426A-2H-3A, 83.0cm		2
346	U1426	A	2	H	3	A	83.5	6.335	7.035		7.01507	40.6	38.1	33.1	34.7218	0.128586	5.73069	-	XXXX	U1426A-2H-3A, 83.5cm		2
346	U1426	A	2	H	3	A	84	6.34	7.04		7.02007	40.6	38	33.1	34.6806	0.212895	5.67211	-	XXXX	U1426A-2H-3A, 84.0cm		2
346	U1426	A	2	H	3	A	84.5	6.345	7.045		7.02507	41.6	39.1	34	35.2912	0.0986749	5.74248	-	XXXX	U1426A-2H-3A, 84.5cm		2
346	U1426	A	2	H	3	A	85	6.35	7.05		7.03007	42	39.5	34.2	35.5106	0.044295	5.88181	-	XXXX	U1426A-2H-3A, 85.0cm		2
346	U1426	A	2	H	3	A	85.5	6.355	7.055		7.03507	41.6	39.1	33.7	35.2798	0.0183258	5.99648	-	XXXX	U1426A-2H-3A, 85.5cm		2
346	U1426	A	2	H	3	A	86	6.36	7.06		7.04007	41.8	39.3	33.9	35.3934	0.0179882	5.98121	-	XXXX	U1426A-2H-3A, 86.0cm		2
346	U1426	A	2	H	3	A	86.5	6.365	7.065		7.04507	41.9	39.3	33.8	35.4021	0.0471934	6.08527	-	XXXX	U1426A-2H-3A, 86.5cm		2
346	U1426	A	2	H	3	A	87	6.37	7.07		7.05007	41.9	39.3	33.9	35.4059	0.0738523	6.00064	-	XXXX	U1426A-2H-3A, 87.0cm		2
346	U1426	A	2	H	3	A	87.5	6.375	7.075		7.05507	42.2	39.6	34.1	35.572	0.0465432	6.06209	-	XXXX	U1426A-2H-3A, 87.5cm		2
346	U1426	A	2	H	3	A	88	6.38	7.08		7.06007	42.4	39.7	34.2	35.6409	0.101853	6.07375	-	XXXX	U1426A-2H-3A, 88.0cm		2
346	U1426	A	2	H	3	A	88.5	6.385	7.085		7.06507	42	39.4	34.2	35.4702	0.12689	5.82438	-	XXXX	U1426A-2H-3A, 88.5cm		2
346	U1426	A	2	H	3	A	89	6.39	7.09		7.07007	41.3	38.8	33.9	35.1278	0.153314	5.59483	-	XXXX	U1426A-2H-3A, 89.0cm		2
346	U1426	A	2	H	3	A	89.5	6.395	7.095		7.07507	41.4	39	33.9	35.2217	0.0428903	5.73024	-	XXXX	U1426A-2H-3A, 89.5cm		2
346	U1426	A	2	H	3	A	90	6.4	7.1		7.08007	40.9	38.7	33.5	35.0213	-0.0963306	5.79804	-	XXXX	U1426A-2H-3A, 90.0cm		2
346	U1426	A	2	H	3	A	90.5	6.405	7.105		7.08507	40.7	38.5	33.4	34.9104	-0.0692583	5.72757	-	XXXX	U1426A-2H-3A, 90.5cm		2
346	U1426	A	2	H	3	A	91	6.41	7.11		7.09007	41.6	39.3	34.3	35.3838	0.0133011	5.605	-	XXXX	U1426A-2H-3A, 91.0cm		2
346	U1426	A	2	H	3	A	91.5	6.415	7.115		7.09507	43.3	40.9	35.5	36.2794	-0.0391708	5.84417	-	XXXX	U1426A-2H-3A, 91.5cm		2
346	U1426	A	2	H	3	A	92	6.42	7.12		7.10007	43.1	40.8	35.2	36.2042	-0.146375	5.99774	-	XXXX	U1426A-2H-3A, 92.0cm		2
346	U1426	A	2	H	3	A	92.5	6.425	7.125		7.10507	43.3	40.9	35.3	36.272	-0.0915926	6.00935	-	XXXX	U1426A-2H-3A, 92.5cm		2
346	U1426	A	2	H	3	A	93	6.43	7.13		7.11007	43.3	40.9	35.2	36.2682	-0.117787	6.0921	-	XXXX	U1426A-2H-3A, 93.0cm		2
346	U1426	A	2	H	3	A	93.5	6.435	7.135		7.11507	43	40.7	35.1	36.1485	-0.146443	6.00514	-	XXXX	U1426A-2H-3A, 93.5cm		2
346	U1426	A	2	H	3	A	94	6.44	7.14		7.12007	43	40.6	35	36.105	-0.0915587	6.03163	-	XXXX	U1426A-2H-3A, 94.0cm		2
346	U1426	A	2	H	3	A	94.5	6.445	7.145		7.12507	43.5	41.2	35.4	36.4187	-0.198359	6.13328	-	XXXX	U1426A-2H-3A, 94.5cm		2
346	U1426	A	2	H	3	A	95	6.45	7.15		7.13007	43.4	40.9	34.9	36.2693	-0.141498	6.36002	-	XXXX	U1426A-2H-3A, 95.0cm		2
346	U1426	A	2	H	3	A	95.5	6.455	7.155		7.13507	43.2	40.8	34.8	36.2015	-0.196416	6.34895	-	XXXX	U1426A-2H-3A, 95.5cm		2
346	U1426	A	2	H	3	A	96	6.46	7.16		7.14007	43.5	40.8	34.7	36.2344	-0.0579661	6.4893	-	XXXX	U1426A-2H-3A, 96.0cm		2
346	U1426	A	2	H	3	A	96.5	6.465	7.165		7.14507	43.2	40.4	34.1	36.0163	-0.054774	6.70926	-	XXXX	U1426A-2H-3A, 96.5cm		2
346	U1426	A	2	H	3	A	97	6.47	7.17		7.15007	42.6	39.7	33.4	35.6356	0.00178332	6.78928	-	XXXX	U1426A-2H-3A, 97.0cm		2
346	U1426	A	2	H	3	A	97.5	6.475	7.175		7.15507	42.9	39.8	33.4	35.7131	0.0864858	6.90406	-	XXXX	U1426A-2H-3A, 97.5cm		2
346	U1426	A	2	H	3	A	98	6.48	7.18		7.16007	43.2	40.1	33.4	35.8704	0.00716292	7.13175	-	XXXX	U1426A-2H-3A, 98.0cm		2
346	U1426	A	2	H	3	A	98.5	6.485	7.185		7.16507	44.2	41.1	34.1	36.4164	-0.072488	7.2922	-	XXXX	U1426A-2H-3A, 98.5cm		2
346	U1426	A	2	H	3	A	99	6.49	7.19		7.17007	44	41.2	34.6	36.4499	-0.133327	6.89161	-	XXXX	U1426A-2H-3A, 99.0cm		2
346	U1426	A	2	H	3	A	99.5	6.495	7.195		7.17507	44	41.2	35	36.4646	-0.0297739	6.55882	-	XXXX	U1426A-2H-3A, 99.5cm		2
346	U1426	A	2	H	3	A	100	6.5	7.2		7.18007	44.1	41.3	35.1	36.5198	-0.0299127	6.55066	-	XXXX	U1426A-2H-3A, 100.0cm		2
346	U1426	A	2	H	3	A	100.5	6.505	7.205		7.18507	44.5	42	35.8	36.8683	-0.192665	6.43833	-	XXXX	U1426A-2H-3A, 100.5cm		2
346	U1426	A	2	H	3	A	101	6.51	7.21		7.19007	44.5	42	35.8	36.8683	-0.192665	6.43833	-	XXXX	U1426A-2H-3A, 101.0cm		2
346	U1426	A	2	H	3	A	101.5	6.515	7.215		7.19507	44.5	42	35.9	36.872	-0.166892	6.35641	-	XXXX	U1426A-2H-3A, 101.5cm		2
346	U1426	A	2	H	3	A	102	6.52	7.22		7.20007	45	42.5	36.1	37.1338	-0.243405	6.56233	-	XXXX	U1426A-2H-3A, 102.0cm		2
346	U1426	A	2	H	3	A	102.5	6.525	7.225		7.20507	44.1	41.8	36.1	36.7531	-0.171639	6.00686	-	XXXX	U1426A-2H-3A, 102.5cm		2
346	U1426	A	2	H	3	A	103	6.53	7.23		7.21007	44.3	42.1	36.5	36.9091	-0.199307	5.88532	-	XXXX	U1426A-2H-3A, 103.0cm		2
346	U1426	A	2	H	3	A	103.5	6.535	7.235		7.21507	45.1	42.9	37.2	37.3406	-0.223809	5.91028	-	XXXX	U1426A-2H-3A, 103.5cm		2
346	U1426	A	2	H	3	A	104	6.54	7.24		7.22007	45.6	43.5	37.7	37.6486	-0.301143	5.93049	-	XXXX	U1426A-2H-3A, 104.0cm		2
346	U1426	A	2	H	3	A	104.5	6.545	7.245		7.22507	45.5	43.3	37.5	37.5528	-0.24865	5.96267	-	XXXX	U1426A-2H-3A, 104.5cm		2
346	U1426	A	2	H	3	A	105	6.55	7.25		7.23007	44.2	42.5	36.9	37.0678	-0.466926	5.76468	-	XXXX	U1426A-2H-3A, 105.0cm		2
346	U1426	A	2	H	3	A	105.5	6.555	7.255		7.23507	43.7	42.4	37	36.973	-0.630783	5.53571	-	XXXX	U1426A-2H-3A, 105.5cm		2
346	U1426	A	2	H	3	A	106	6.56	7.26		7.24007	44.9	43.3	37.7	37.4895	-0.515991	5.69275	-	XXXX	U1426A-2H-3A, 106.0cm		2
346	U1426	A	2	H	3	A	106.5	6.565	7.265		7.24507	45.5	43.7	38	37.7244	-0.433533	5.78251	-	XXXX	U1426A-2H-3A, 106.5cm		2
346	U1426	A	2	H	3	A	107	6.57	7.27		7.25007	45.2	43.4	37.8	37.5669	-0.409278	5.72283	-	XXXX	U1426A-2H-3A, 107.0cm		2
346	U1426	A	2	H	3	A	107.5	6.575	7.275		7.25507	45.6	43.8	38.1	37.778	-0.433077	5.77587	-	XXXX	U1426A-2H-3A, 107.5cm		2
346	U1426	A	2	H	3	A	108	6.58	7.28		7.26007	45.5	43.7	38.1	37.728	-0.407991	5.70311	-	XXXX	U1426A-2H-3A, 108.0cm		2
346	U1426	A	2	H	3	A	108.5	6.585	7.285		7.26507	45.8	44.1	38.6	37.9339	-0.433374	5.58013	-	XXXX	U1426A-2H-3A, 108.5cm		2
346	U1426	A	2	H	3	A	109	6.59	7.29		7.27007	45.9	44.2	38.7	37.9872	-0.432911	5.57382	-	XXXX	U1426A-2H-3A, 109.0cm		2
346	U1426	A	2	H	3	A	109.5	6.595	7.295		7.27507	45.4	43.7	38.5	37.7308	-0.358439	5.36825	-	XXXX	U1426A-2H-3A, 109.5cm		2
346	U1426	A	2	H	3	A	110	6.6	7.3		7.28007	44.4	42.8	38.1	37.252	-0.28564	5.00654	-	XXXX	U1426A-2H-3A, 110.0cm		2
346	U1426	A	2	H	3	A	110.5	6.605	7.305		7.28507	45.7	44.1	39.3	37.9475	-0.307196	5.0127	-	XXXX	U1426A-2H-3A, 110.5cm		2
346	U1426	A	2	H	3	A	111	6.61	7.31		7.29007	46.1	44.6	39.7	38.1982	-0.38303	5.04492	-	XXXX	U1426A-2H-3A, 111.0cm		2
346	U1426	A	2	H	3	A	111.5	6.615	7.315		7.29507	46.8	45.3	40.1	38.557	-0.45578	5.23801	-	XXXX	U1426A-2H-3A, 111.5cm		2
346	U1426	A	2	H	3	A	112	6.62	7.32		7.30007	46.7	45.1	40	38.4668	-0.379728	5.18999	-	XXXX	U1426A-2H-3A, 112.0cm		2
346	U1426	A	2	H	3	A	112.5	6.625	7.325		7.30507	46.9	45.3	40.2	38.572	-0.378919	5.1787	-	XXXX	U1426A-2H-3A, 112.5cm		2
346	U1426	A	2	H	3	A	113	6.63	7.33		7.31007	48	46.4	41	39.1356	-0.4492	5.34633	-	XXXX	U1426A-2H-3A, 113.0cm		2
346	U1426	A	2	H	3	A	113.5	6.635	7.335		7.31507	48.1	46.5	41.1	39.1874	-0.448731	5.3406	-	XXXX	U1426A-2H-3A, 113.5cm		2
346	U1426	A	2	H	3	A	114	6.64	7.34		7.32007	48.3	46.7	41.2	39.2874	-0.472578	5.40522	-	XXXX	U1426A-2H-3A, 114.0cm		2
346	U1426	A	2	H	3	A	114.5	6.645	7.345		7.32507	48.1	46.4	41	39.1469	-0.398238	5.36396	-	XXXX	U1426A-2H-3A, 114.5cm		2
346	U1426	A	2	H	3	A	115	6.65	7.35		7.33007	47	45.4	40.2	38.621	-0.40368	5.25016	-	XXXX	U1426A-2H-3A, 115.0cm		2
346	U1426	A	2	H	3	A	115.5	6.655	7.355		7.33507	46.9	45.4	40.3	38.6131	-0.430091	5.15523	-	XXXX	U1426A-2H-3A, 115.5cm		2
346	U1426	A	2	H	3	A	116	6.66	7.36		7.34007	47.2	45.8	40.9	38.8183	-0.429322	4.96223	-	XXXX	U1426A-2H-3A, 116.0cm		2
346	U1426	A	2	H	3	A	116.5	6.665	7.365		7.34507	46.9	45.5	40.9	38.672	-0.355072	4.74833	-	XXXX	U1426A-2H-3A, 116.5cm		2
346	U1426	A	2	H	3	A	117	6.67	7.37		7.35007	46.8	45.2	40.3	38.5266	-0.328858	5.03004	-	XXXX	U1426A-2H-3A, 117.0cm		2
346	U1426	A	2	H	3	A	117.5	6.675	7.375		7.35507	46.8	44.9	39.5	38.3851	-0.30063	5.48834	-	XXXX	U1426A-2H-3A, 117.5cm		2
346	U1426	A	2	H	3	A	118	6.68	7.38		7.36007	46.3	44.2	38.5	38.0265	-0.273962	5.80394	-	XXXX	U1426A-2H-3A, 118.0cm		2
346	U1426	A	2	H	3	A	118.5	6.685	7.385		7.36507	46.1	44	38.2	37.9163	-0.299796	5.89636	-	XXXX	U1426A-2H-3A, 118.5cm		2
346	U1426	A	2	H	3	A	119	6.69	7.39		7.37007	45.9	43.8	38.1	37.813	-0.274919	5.83056	-	XXXX	U1426A-2H-3A, 119.0cm		2
346	U1426	A	2	H	3	A	119.5	6.695	7.395		7.37507	45.8	43.5	37.7	37.6721	-0.195395	5.96712	-	XXXX	U1426A-2H-3A, 119.5cm		2
346	U1426	A	2	H	3	A	120	6.7	7.4		7.38007	45.6	43.4	37.7	37.6103	-0.222951	5.87589	-	XXXX	U1426A-2H-3A, 120.0cm		2
346	U1426	A	2	H	3	A	120.5	6.705	7.405		7.38507	45.1	42.8	36.9	37.291	-0.221922	6.09689	-	XXXX	U1426A-2H-3A, 120.5cm		2
346	U1426	A	2	H	3	A	121	6.71	7.41		7.39007	44.9	42.7	37	37.2322	-0.224155	5.92421	-	XXXX	U1426A-2H-3A, 121.0cm		2
346	U1426	A	2	H	3	A	121.5	6.715	7.415		7.39507	43.8	41.7	36.4	36.6888	-0.17586	5.65019	-	XXXX	U1426A-2H-3A, 121.5cm		2
346	U1426	A	2	H	3	A	122	6.72	7.42		7.40007	44.7	42.5	37.2	37.1382	-0.121351	5.6157	-	XXXX	U1426A-2H-3A, 122.0cm		2
346	U1426	A	2	H	3	A	122.5	6.725	7.425		7.40507	44.5	42.2	36.7	36.9794	-0.11957	5.81591	-	XXXX	U1426A-2H-3A, 122.5cm		2
346	U1426	A	2	H	3	A	123	6.73	7.43		7.41007	43.7	41.3	35.9	36.5009	-0.0394576	5.81585	-	XXXX	U1426A-2H-3A, 123.0cm		2
346	U1426	A	2	H	3	A	123.5	6.735	7.435		7.41507	44	41.6	36.2	36.6663	-0.0396663	5.79488	-	XXXX	U1426A-2H-3A, 123.5cm		2
346	U1426	A	2	H	3	A	124	6.74	7.44		7.42007	45.1	42.7	36.9	37.2523	-0.143015	6.04188	-	XXXX	U1426A-2H-3A, 124.0cm		2
346	U1426	A	2	H	3	A	124.5	6.745	7.445		7.42507	44.8	42.4	36.7	37.093	-0.117449	5.98246	-	XXXX	U1426A-2H-3A, 124.5cm		2
346	U1426	A	2	H	3	A	125	6.75	7.45		7.43007	44.8	42.3	36.5	37.0468	-0.0895699	6.08933	-	XXXX	U1426A-2H-3A, 125.0cm		2
346	U1426	A	2	H	3	A	125.5	6.755	7.455		7.43507	45.1	42.5	36.5	37.1603	-0.0873811	6.25547	-	XXXX	U1426A-2H-3A, 125.5cm		2
346	U1426	A	2	H	3	A	126	6.76	7.46		7.44007	45.5	43	36.9	37.4156	-0.166216	6.28047	-	XXXX	U1426A-2H-3A, 126.0cm		2
346	U1426	A	2	H	3	A	126.5	6.765	7.465		7.44507	45.6	43.1	37.1	37.4732	-0.140684	6.19254	-	XXXX	U1426A-2H-3A, 126.5cm		2
346	U1426	A	2	H	3	A	127	6.77	7.47		7.45007	45.1	42.6	36.8	37.21	-0.0896308	6.06759	-	XXXX	U1426A-2H-3A, 127.0cm		2
346	U1426	A	2	H	3	A	127.5	6.775	7.475		7.45507	44.2	41.7	35.7	36.7112	-0.141217	6.29756	-	XXXX	U1426A-2H-3A, 127.5cm		2
346	U1426	A	2	H	3	A	128	6.78	7.48		7.46007	44	41.3	35.3	36.5151	-0.0324985	6.36631	-	XXXX	U1426A-2H-3A, 128.0cm		2
346	U1426	A	2	H	3	A	128.5	6.785	7.485		7.46507	43.6	40.8	34.7	36.2466	-0.0031707	6.50831	-	XXXX	U1426A-2H-3A, 128.5cm		2
346	U1426	A	2	H	3	A	129	6.79	7.49		7.47007	42.1	39.1	33.3	35.3271	0.191785	6.43425	-	XXXX	U1426A-2H-3A, 129.0cm		2
346	U1426	A	2	H	3	A	129.5	6.795	7.495		7.47507	40.1	37.1	31.7	34.189	0.310442	6.25654	-	XXXX	U1426A-2H-3A, 129.5cm		2
346	U1426	A	2	H	3	A	130	6.8	7.5		7.48007	41.3	38.3	32.6	34.8735	0.222358	6.41582	-	XXXX	U1426A-2H-3A, 130.0cm		2
346	U1426	A	2	H	3	A	130.5	6.805	7.505		7.48507	40.5	37.7	32.3	34.5129	0.192423	6.16655	-	XXXX	U1426A-2H-3A, 130.5cm		2
346	U1426	A	2	H	3	A	131	6.81	7.51		7.49007	41	38	32.2	34.6968	0.197002	6.52825	-	XXXX	U1426A-2H-3A, 131.0cm		2
346	U1426	A	2	H	3	A	131.5	6.815	7.515		7.49507	43.5	40.7	35.2	36.2133	0.153653	6.01744	-	XXXX	U1426A-2H-3A, 131.5cm		2
346	U1426	A	2	H	3	A	132	6.82	7.52		7.50007	45	43	37.8	37.3892	-0.201594	5.46649	-	XXXX	U1426A-2H-3A, 132.0cm		2
346	U1426	A	2	H	3	A	132.5	6.825	7.525		7.50507	46.1	44.4	39.1	38.1008	-0.3812	5.40452	-	XXXX	U1426A-2H-3A, 132.5cm		2
346	U1426	A	2	H	3	A	133	6.83	7.53		7.51007	46.7	44.9	39.7	38.3807	-0.302063	5.31489	-	XXXX	U1426A-2H-3A, 133.0cm		2
346	U1426	A	2	H	3	A	133.5	6.835	7.535		7.51507	47	45.2	39.8	38.5317	-0.351465	5.45227	-	XXXX	U1426A-2H-3A, 133.5cm		2
346	U1426	A	2	H	3	A	134	6.84	7.54		7.52007	47.5	45.7	40.2	38.7903	-0.374712	5.49952	-	XXXX	U1426A-2H-3A, 134.0cm		2
346	U1426	A	2	H	3	A	134.5	6.845	7.545		7.52507	47.4	45.7	40.2	38.7789	-0.426132	5.48173	-	XXXX	U1426A-2H-3A, 134.5cm		2
346	U1426	A	2	H	3	A	135	6.85	7.55		7.53007	47.6	45.9	40.3	38.8798	-0.450214	5.54671	-	XXXX	U1426A-2H-3A, 135.0cm		2
346	U1426	A	2	H	3	A	135.5	6.855	7.555		7.53507	46.8	45.2	40	38.5159	-0.404542	5.26162	-	XXXX	U1426A-2H-3A, 135.5cm		2
346	U1426	A	2	H	3	A	136	6.86	7.56		7.54007	47	45.5	40	38.6514	-0.530224	5.45809	-	XXXX	U1426A-2H-3A, 136.0cm		2
346	U1426	A	2	H	3	A	136.5	6.865	7.565		7.54507	47.8	46.3	40.8	39.0689	-0.52565	5.41083	-	XXXX	U1426A-2H-3A, 136.5cm		2
346	U1426	A	2	H	3	A	137	6.87	7.57		7.55007	48.1	46.5	40.8	39.1769	-0.523214	5.56951	-	XXXX	U1426A-2H-3A, 137.0cm		2
346	U1426	A	2	H	3	A	137.5	6.875	7.575		7.55507	47.7	46.2	40.6	39.0134	-0.551152	5.49328	-	XXXX	U1426A-2H-3A, 137.5cm		2
346	U1426	A	2	H	3	A	138	6.88	7.58		7.56007	47.1	45.6	40.3	38.7109	-0.479418	5.29793	-	XXXX	U1426A-2H-3A, 138.0cm		2
346	U1426	A	2	H	3	A	138.5	6.885	7.585		7.56507	47.5	45.9	40.7	38.8826	-0.401547	5.22184	-	XXXX	U1426A-2H-3A, 138.5cm		2
346	U1426	A	2	H	3	A	139	6.89	7.59		7.57007	48.3	46.8	41.3	39.3278	-0.522849	5.38191	-	XXXX	U1426A-2H-3A, 139.0cm		2
346	U1426	A	2	H	3	A	139.5	6.895	7.595		7.57507	48.8	47.1	41.4	39.4978	-0.469355	5.55121	-	XXXX	U1426A-2H-3A, 139.5cm		2
346	U1426	A	2	H	3	A	140	6.9	7.6		7.58007	48.4	46.7	41.3	39.3021	-0.397027	5.34678	-	XXXX	U1426A-2H-3A, 140.0cm		2
346	U1426	A	2	H	3	A	140.5	6.905	7.605		7.58507	48.2	46.5	41.3	39.2057	-0.348189	5.20605	-	XXXX	U1426A-2H-3A, 140.5cm		2
346	U1426	A	2	H	3	A	141	6.91	7.61		7.59007	49.1	47.4	41.9	39.6587	-0.418816	5.38262	-	XXXX	U1426A-2H-3A, 141.0cm		2
346	U1426	A	2	H	3	A	141.5	6.915	7.615		7.59507	49.6	47.8	41.9	39.8604	-0.464766	5.67794	-	XXXX	U1426A-2H-3A, 141.5cm		2
346	U1426	A	2	H	3	A	142	6.92	7.62		7.60007	48.9	47.2	41.6	39.5526	-0.444273	5.4696	-	XXXX	U1426A-2H-3A, 142.0cm		2
346	U1426	A	2	H	3	A	142.5	6.925	7.625		7.60507	47.8	46	40.5	38.9468	-0.373593	5.48157	-	XXXX	U1426A-2H-3A, 142.5cm		2
346	U1426	A	2	H	3	A	143	6.93	7.63		7.61007	48.5	46.8	41.2	39.3467	-0.446076	5.49299	-	XXXX	U1426A-2H-3A, 143.0cm		2
346	U1426	A	2	H	3	A	143.5	6.935	7.635		7.61507	48.2	46.6	41	39.2322	-0.497873	5.48721	-	XXXX	U1426A-2H-3A, 143.5cm		2
346	U1426	A	2	H	3	A	144	6.94	7.64		7.62007	48.2	46.5	41	39.1952	-0.422642	5.43442	-	XXXX	U1426A-2H-3A, 144.0cm		2
346	U1426	A	2	H	3	A	144.5	6.945	7.645		7.62507	47.6	45.9	40.2	38.8763	-0.475167	5.62371	-	XXXX	U1426A-2H-3A, 144.5cm		2
346	U1426	A	2	H	3	A	145	6.95	7.65		7.63007	47.5	45.8	40.1	38.8241	-0.475661	5.62988	-	XXXX	U1426A-2H-3A, 145.0cm		2
346	U1426	A	2	H	3	A	145.5	6.955	7.655		7.63507	48.5	46.8	41.3	39.3502	-0.421355	5.41699	-	XXXX	U1426A-2H-3A, 145.5cm		2
346	U1426	A	2	H	3	A	146	6.96	7.66		7.64007	49	47.2	41.7	39.5673	-0.369213	5.41147	-	XXXX	U1426A-2H-3A, 146.0cm		2
346	U1426	A	2	H	3	A	146.5	6.965	7.665		7.64507	48.5	46.8	41.3	39.3502	-0.421355	5.41699	-	XXXX	U1426A-2H-3A, 146.5cm		2
346	U1426	A	2	H	3	A	147	6.97	7.67		7.65007	50.3	48.5	42.6	40.2158	-0.461617	5.63627	-	XXXX	U1426A-2H-3A, 147.0cm		2
346	U1426	A	2	H	3	A	147.5	6.975	7.675		7.65507	48.8	47.1	41.2	39.4908	-0.518596	5.70304	-	XXXX	U1426A-2H-3A, 147.5cm		2
346	U1426	A	2	H	3	A	148	6.98	7.68		7.66007	49.1	47.4	41.4	39.6413	-0.541549	5.76048	-	XXXX	U1426A-2H-3A, 148.0cm		2
346	U1426	A	2	H	3	A	148.5	6.985	7.685		7.66507	48.8	47	41.3	39.4575	-0.419206	5.57465	-	XXXX	U1426A-2H-3A, 148.5cm		2
346	U1426	A	2	H	3	A	149	6.99	7.69		7.67007	42.9	41.3	36.3	36.4191	-0.369733	5.33783	-	XXXX	U1426A-2H-3A, 149.0cm		2
346	U1426	A	2	H	3	A	149.5	6.995	7.695		7.67507	39	37.3	32.6	34.1662	-0.246885	5.37068	-	XXXX	U1426A-2H-3A, 149.5cm		2
346	U1426	A	2	H	4	A	0	7	7.7		7.68007	44.5	42.6	37.3	37.1569	-0.281599	5.55354	-	XXXX	U1426A-2H-4A, 0.0cm	sub_sample_width 1.5 cm, median_filter_rank 0, data_decimate 100	2
346	U1426	A	2	H	4	A	0.5	7.005	7.705		7.68507	49	47	40.7	39.4591	-0.465346	6.06679	-	XXXX	U1426A-2H-4A, 0.5cm		2
346	U1426	A	2	H	4	A	1	7.01	7.71		7.69007	47.3	45.5	39.4	38.6644	-0.52559	5.97697	-	XXXX	U1426A-2H-4A, 1.0cm		2
346	U1426	A	2	H	4	A	1.5	7.015	7.715		7.69507	48.2	46.3	40	39.086	-0.519641	6.09598	-	XXXX	U1426A-2H-4A, 1.5cm		2
346	U1426	A	2	H	4	A	2	7.02	7.72		7.70007	48	45.9	39.5	38.8972	-0.443643	6.23628	-	XXXX	U1426A-2H-4A, 2.0cm		2
346	U1426	A	2	H	4	A	2.5	7.025	7.725		7.70507	48.4	46.5	40.1	39.1863	-0.543288	6.15955	-	XXXX	U1426A-2H-4A, 2.5cm		2
346	U1426	A	2	H	4	A	3	7.03	7.73		7.71007	48.2	46.3	39.9	39.0826	-0.544369	6.17321	-	XXXX	U1426A-2H-4A, 3.0cm		2
346	U1426	A	2	H	4	A	3.5	7.035	7.735		7.71507	48	46	39.7	38.9414	-0.469819	6.13404	-	XXXX	U1426A-2H-4A, 3.5cm		2
346	U1426	A	2	H	4	A	4	7.04	7.74		7.72007	47.2	45.4	39.1	38.6049	-0.576155	6.13976	-	XXXX	U1426A-2H-4A, 4.0cm		2
346	U1426	A	2	H	4	A	4.5	7.045	7.745		7.72507	48.6	46.8	40.5	39.3336	-0.567965	6.04498	-	XXXX	U1426A-2H-4A, 4.5cm		2
346	U1426	A	2	H	4	A	5	7.05	7.75		7.73007	48	46.2	39.7	39.0158	-0.620988	6.23982	-	XXXX	U1426A-2H-4A, 5.0cm		2
346	U1426	A	2	H	4	A	5.5	7.055	7.755		7.73507	47.7	45.8	39.4	38.8222	-0.547099	6.20775	-	XXXX	U1426A-2H-4A, 5.5cm		2
346	U1426	A	2	H	4	A	6	7.06	7.76		7.74007	47.8	45.9	39.6	38.8779	-0.521715	6.12315	-	XXXX	U1426A-2H-4A, 6.0cm		2
346	U1426	A	2	H	4	A	6.5	7.065	7.765		7.74507	48.1	46.3	40.2	39.0817	-0.521312	5.92416	-	XXXX	U1426A-2H-4A, 6.5cm		2
346	U1426	A	2	H	4	A	7	7.07	7.77		7.75007	48.2	46.3	40	39.086	-0.519641	6.09598	-	XXXX	U1426A-2H-4A, 7.0cm		2
346	U1426	A	2	H	4	A	7.5	7.075	7.775		7.75507	49	47.1	40.8	39.4993	-0.515564	6.0427	-	XXXX	U1426A-2H-4A, 7.5cm		2
346	U1426	A	2	H	4	A	8	7.08	7.78		7.76007	48.8	47	40.8	39.4401	-0.542241	5.95538	-	XXXX	U1426A-2H-4A, 8.0cm		2
346	U1426	A	2	H	4	A	8.5	7.085	7.785		7.76507	49.1	47.4	41.1	39.6309	-0.615087	5.98824	-	XXXX	U1426A-2H-4A, 8.5cm		2
346	U1426	A	2	H	4	A	9	7.09	7.79		7.77007	48.8	47.1	40.8	39.4769	-0.616975	6.00775	-	XXXX	U1426A-2H-4A, 9.0cm		2
346	U1426	A	2	H	4	A	9.5	7.095	7.795		7.77507	49.1	47.3	40.9	39.5874	-0.589616	6.08835	-	XXXX	U1426A-2H-4A, 9.5cm		2
346	U1426	A	2	H	4	A	10	7.1	7.8		7.78007	48.5	46.9	40.8	39.3696	-0.619795	5.8504	-	XXXX	U1426A-2H-4A, 10.0cm		2
346	U1426	A	2	H	4	A	10.5	7.105	7.805		7.78507	48.8	47.2	40.9	39.5171	-0.667033	5.98377	-	XXXX	U1426A-2H-4A, 10.5cm		2
346	U1426	A	2	H	4	A	11	7.11	7.81		7.79007	49.1	47.3	41.1	39.5943	-0.540618	5.93605	-	XXXX	U1426A-2H-4A, 11.0cm		2
346	U1426	A	2	H	4	A	11.5	7.115	7.815		7.79507	50.1	48.3	42	40.1008	-0.559558	5.94805	-	XXXX	U1426A-2H-4A, 11.5cm		2
346	U1426	A	2	H	4	A	12	7.12	7.82		7.80007	50.6	48.9	42.6	40.393	-0.605897	5.89342	-	XXXX	U1426A-2H-4A, 12.0cm		2
346	U1426	A	2	H	4	A	12.5	7.125	7.825		7.80507	51.2	49.5	43	40.6874	-0.650267	6.0049	-	XXXX	U1426A-2H-4A, 12.5cm		2
346	U1426	A	2	H	4	A	13	7.13	7.83		7.81007	51.2	49.5	43	40.6874	-0.650267	6.0049	-	XXXX	U1426A-2H-4A, 13.0cm		2
346	U1426	A	2	H	4	A	13.5	7.135	7.835		7.81507	50.8	49.2	42.7	40.5261	-0.701686	6.0067	-	XXXX	U1426A-2H-4A, 13.5cm		2
346	U1426	A	2	H	4	A	14	7.14	7.84		7.82007	51.2	49.6	43.2	40.7299	-0.674927	5.90765	-	XXXX	U1426A-2H-4A, 14.0cm		2
346	U1426	A	2	H	4	A	14.5	7.145	7.845		7.82507	51.4	49.7	43.3	40.7907	-0.625081	5.91848	-	XXXX	U1426A-2H-4A, 14.5cm		2
346	U1426	A	2	H	4	A	15	7.15	7.85		7.83007	51.8	50.2	43.8	41.0287	-0.670939	5.87125	-	XXXX	U1426A-2H-4A, 15.0cm		2
346	U1426	A	2	H	4	A	15.5	7.155	7.855		7.83507	52.3	50.6	44	41.2309	-0.667061	6.01045	-	XXXX	U1426A-2H-4A, 15.5cm		2
346	U1426	A	2	H	4	A	16	7.16	7.86		7.84007	51.6	49.9	43.4	40.887	-0.647733	5.98004	-	XXXX	U1426A-2H-4A, 16.0cm		2
346	U1426	A	2	H	4	A	16.5	7.165	7.865		7.84507	52.4	50.8	44.1	41.3156	-0.738032	6.05458	-	XXXX	U1426A-2H-4A, 16.5cm		2
346	U1426	A	2	H	4	A	17	7.17	7.87		7.85007	52.2	50.6	44.1	41.2235	-0.692044	5.92048	-	XXXX	U1426A-2H-4A, 17.0cm		2
346	U1426	A	2	H	4	A	17.5	7.175	7.875		7.85507	52.7	51.2	44.7	41.5084	-0.736393	5.86795	-	XXXX	U1426A-2H-4A, 17.5cm		2
346	U1426	A	2	H	4	A	18	7.18	7.88		7.86007	51.8	50.2	43.7	41.0254	-0.694759	5.94475	-	XXXX	U1426A-2H-4A, 18.0cm		2
346	U1426	A	2	H	4	A	18.5	7.185	7.885		7.86507	50.2	48.6	42.5	40.2375	-0.609055	5.7453	-	XXXX	U1426A-2H-4A, 18.5cm		2
346	U1426	A	2	H	4	A	19	7.19	7.89		7.87007	50.2	48.5	42.4	40.1979	-0.559849	5.76852	-	XXXX	U1426A-2H-4A, 19.0cm		2
346	U1426	A	2	H	4	A	19.5	7.195	7.895		7.87507	51.2	49.6	43.2	40.7299	-0.674927	5.90765	-	XXXX	U1426A-2H-4A, 19.5cm		2
346	U1426	A	2	H	4	A	20	7.2	7.9		7.88007	52.2	50.6	44.1	41.2235	-0.692044	5.92048	-	XXXX	U1426A-2H-4A, 20.0cm		2
346	U1426	A	2	H	4	A	20.5	7.205	7.905		7.88507	52.3	50.7	44	41.2662	-0.738751	6.06077	-	XXXX	U1426A-2H-4A, 20.5cm		2
346	U1426	A	2	H	4	A	21	7.21	7.91		7.89007	51.8	50.1	43.6	40.9865	-0.646476	5.96772	-	XXXX	U1426A-2H-4A, 21.0cm		2
346	U1426	A	2	H	4	A	21.5	7.215	7.915		7.89507	52.4	50.7	44.1	41.2803	-0.666421	6.00432	-	XXXX	U1426A-2H-4A, 21.5cm		2
346	U1426	A	2	H	4	A	22	7.22	7.92		7.90007	53.2	51.5	45.1	41.68	-0.614388	5.81116	-	XXXX	U1426A-2H-4A, 22.0cm		2
346	U1426	A	2	H	4	A	22.5	7.225	7.925		7.90507	52.6	50.9	44.5	41.3856	-0.617892	5.84631	-	XXXX	U1426A-2H-4A, 22.5cm		2
346	U1426	A	2	H	4	A	23	7.23	7.93		7.91007	52.5	50.7	44	41.2877	-0.641444	6.09426	-	XXXX	U1426A-2H-4A, 23.0cm		2
346	U1426	A	2	H	4	A	23.5	7.235	7.935		7.91507	52.4	50.6	43.9	41.2383	-0.64205	6.1005	-	XXXX	U1426A-2H-4A, 23.5cm		2
346	U1426	A	2	H	4	A	24	7.24	7.94		7.92007	52.5	50.8	44.1	41.3263	-0.689422	6.07131	-	XXXX	U1426A-2H-4A, 24.0cm		2
346	U1426	A	2	H	4	A	24.5	7.245	7.945		7.92507	53.1	51.3	44.5	41.5795	-0.661337	6.12993	-	XXXX	U1426A-2H-4A, 24.5cm		2
346	U1426	A	2	H	4	A	25	7.25	7.95		7.93007	52.5	50.8	44.1	41.3263	-0.689422	6.07131	-	XXXX	U1426A-2H-4A, 25.0cm		2
346	U1426	A	2	H	4	A	25.5	7.255	7.955		7.93507	52.1	50.4	43.9	41.1353	-0.644606	5.94938	-	XXXX	U1426A-2H-4A, 25.5cm		2
346	U1426	A	2	H	4	A	26	7.26	7.96		7.94007	53.1	51.5	44.9	41.6628	-0.709557	5.9393	-	XXXX	U1426A-2H-4A, 26.0cm		2
346	U1426	A	2	H	4	A	26.5	7.265	7.965		7.94507	53.1	51.3	44.5	41.5795	-0.661337	6.12993	-	XXXX	U1426A-2H-4A, 26.5cm		2
346	U1426	A	2	H	4	A	27	7.27	7.97		7.95007	53.4	51.5	44.6	41.6847	-0.635338	6.20677	-	XXXX	U1426A-2H-4A, 27.0cm		2
346	U1426	A	2	H	4	A	27.5	7.275	7.975		7.95507	52.9	51	44.1	41.4395	-0.638264	6.23842	-	XXXX	U1426A-2H-4A, 27.5cm		2
346	U1426	A	2	H	4	A	28	7.28	7.98		7.96007	52.7	50.8	43.8	41.3377	-0.663014	6.32455	-	XXXX	U1426A-2H-4A, 28.0cm		2
346	U1426	A	2	H	4	A	28.5	7.285	7.985		7.96507	52.3	50.3	43.3	41.1014	-0.617228	6.37415	-	XXXX	U1426A-2H-4A, 28.5cm		2
346	U1426	A	2	H	4	A	29	7.29	7.99		7.97007	51.3	49.3	42.6	40.6132	-0.551255	6.21741	-	XXXX	U1426A-2H-4A, 29.0cm		2
346	U1426	A	2	H	4	A	29.5	7.295	7.995		7.97507	50.6	48.7	42.4	40.3141	-0.507686	5.9401	-	XXXX	U1426A-2H-4A, 29.5cm		2
346	U1426	A	2	H	4	A	30	7.3	8		7.98007	50.5	48.5	42	40.2173	-0.507141	6.11994	-	XXXX	U1426A-2H-4A, 30.0cm		2
346	U1426	A	2	H	4	A	30.5	7.305	8.005		7.98507	51	48.9	42.1	40.4199	-0.527679	6.33579	-	XXXX	U1426A-2H-4A, 30.5cm		2
346	U1426	A	2	H	4	A	31	7.31	8.01		7.99007	50.8	48.8	42.2	40.3653	-0.52978	6.17539	-	XXXX	U1426A-2H-4A, 31.0cm		2
346	U1426	A	2	H	4	A	31.5	7.315	8.015		7.99507	50.7	48.7	42.3	40.3217	-0.482117	6.03206	-	XXXX	U1426A-2H-4A, 31.5cm		2
346	U1426	A	2	H	4	A	32	7.32	8.02		8.00007	50.4	48.5	42.2	40.2131	-0.508651	5.95265	-	XXXX	U1426A-2H-4A, 32.0cm		2
346	U1426	A	2	H	4	A	32.5	7.325	8.025		8.00507	50.7	48.7	42.2	40.3183	-0.506199	6.10696	-	XXXX	U1426A-2H-4A, 32.5cm		2
346	U1426	A	2	H	4	A	33	7.33	8.03		8.01007	51	48.8	42.3	40.3907	-0.406519	6.13477	-	XXXX	U1426A-2H-4A, 33.0cm		2
346	U1426	A	2	H	4	A	33.5	7.335	8.035		8.01507	50.8	48.6	41.9	40.283	-0.455304	6.29802	-	XXXX	U1426A-2H-4A, 33.5cm		2
346	U1426	A	2	H	4	A	34	7.34	8.04		8.02007	50.7	48.6	42	40.2754	-0.481001	6.20568	-	XXXX	U1426A-2H-4A, 34.0cm		2
346	U1426	A	2	H	4	A	34.5	7.345	8.045		8.02507	49	47	40.6	39.4556	-0.489865	6.14329	-	XXXX	U1426A-2H-4A, 34.5cm		2
346	U1426	A	2	H	4	A	35	7.35	8.05		8.03007	48.5	46.6	40.3	39.2415	-0.518101	6.07584	-	XXXX	U1426A-2H-4A, 35.0cm		2
346	U1426	A	2	H	4	A	35.5	7.355	8.055		8.03507	49.2	47.2	40.7	39.555	-0.513392	6.20627	-	XXXX	U1426A-2H-4A, 35.5cm		2
346	U1426	A	2	H	4	A	36	7.36	8.06		8.04007	48.4	46.4	39.9	39.1423	-0.517355	6.2612	-	XXXX	U1426A-2H-4A, 36.0cm		2
346	U1426	A	2	H	4	A	36.5	7.365	8.065		8.04507	48.2	46.3	39.9	39.0826	-0.544369	6.17321	-	XXXX	U1426A-2H-4A, 36.5cm		2
346	U1426	A	2	H	4	A	37	7.37	8.07		8.05007	47.5	45.6	39.5	38.7282	-0.473429	5.9881	-	XXXX	U1426A-2H-4A, 37.0cm		2
346	U1426	A	2	H	4	A	37.5	7.375	8.075		8.05507	47.6	45.6	39.3	38.7326	-0.471643	6.16156	-	XXXX	U1426A-2H-4A, 37.5cm		2
346	U1426	A	2	H	4	A	38	7.38	8.08		8.06007	47.6	45.6	39.3	38.7326	-0.471643	6.16156	-	XXXX	U1426A-2H-4A, 38.0cm		2
346	U1426	A	2	H	4	A	38.5	7.385	8.085		8.06507	44.6	42.7	36.8	37.1893	-0.436187	6.03011	-	XXXX	U1426A-2H-4A, 38.5cm		2
346	U1426	A	2	H	4	A	39	7.39	8.09		8.07007	38.7	37.2	32.4	34.078	-0.3908	5.42434	-	XXXX	U1426A-2H-4A, 39.0cm		2
346	U1426	A	2	H	4	A	39.5	7.395	8.095		8.07507	39.8	38.6	33.7	34.8499	-0.581619	5.35405	-	XXXX	U1426A-2H-4A, 39.5cm		2
346	U1426	A	2	H	4	A	40	7.4	8.1		8.08007	40.8	39.6	34.6	35.4176	-0.601042	5.37154	-	XXXX	U1426A-2H-4A, 40.0cm		2
346	U1426	A	2	H	4	A	40.5	7.405	8.105		8.08507	39	37.8	32.9	34.3866	-0.587974	5.40888	-	XXXX	U1426A-2H-4A, 40.5cm		2
346	U1426	A	2	H	4	A	41	7.41	8.11		8.09007	38	36.6	31.8	33.7112	-0.452435	5.44715	-	XXXX	U1426A-2H-4A, 41.0cm		2
346	U1426	A	2	H	4	A	41.5	7.415	8.115		8.09507	36.9	35.4	30.4	32.9984	-0.457368	5.73604	-	XXXX	U1426A-2H-4A, 41.5cm		2
346	U1426	A	2	H	4	A	42	7.42	8.12		8.10007	37.2	35.8	30.9	33.23	-0.485872	5.59491	-	XXXX	U1426A-2H-4A, 42.0cm		2
346	U1426	A	2	H	4	A	42.5	7.425	8.125		8.10507	46.6	44.8	38.7	38.2958	-0.529419	6.02434	-	XXXX	U1426A-2H-4A, 42.5cm		2
346	U1426	A	2	H	4	A	43	7.43	8.13		8.11007	48.7	46.7	40.5	39.3079	-0.44207	6.01002	-	XXXX	U1426A-2H-4A, 43.0cm		2
346	U1426	A	2	H	4	A	43.5	7.435	8.135		8.11507	48.2	46.2	40	39.0489	-0.444178	6.04318	-	XXXX	U1426A-2H-4A, 43.5cm		2
346	U1426	A	2	H	4	A	44	7.44	8.14		8.12007	48.6	46.5	40.1	39.2088	-0.441175	6.19477	-	XXXX	U1426A-2H-4A, 44.0cm		2
346	U1426	A	2	H	4	A	44.5	7.445	8.145		8.12507	47.8	45.7	39.2	38.7893	-0.469298	6.32825	-	XXXX	U1426A-2H-4A, 44.5cm		2
346	U1426	A	2	H	4	A	45	7.45	8.15		8.13007	47.7	45.6	39.4	38.7475	-0.395165	6.1015	-	XXXX	U1426A-2H-4A, 45.0cm		2
346	U1426	A	2	H	4	A	45.5	7.455	8.155		8.13507	47.8	45.8	39.6	38.8406	-0.445886	6.0701	-	XXXX	U1426A-2H-4A, 45.5cm		2
346	U1426	A	2	H	4	A	46	7.46	8.16		8.14007	48.1	46.1	39.8	38.9935	-0.469366	6.12722	-	XXXX	U1426A-2H-4A, 46.0cm		2
346	U1426	A	2	H	4	A	46.5	7.465	8.165		8.14507	47	45.1	39	38.4656	-0.475807	6.02183	-	XXXX	U1426A-2H-4A, 46.5cm		2
346	U1426	A	2	H	4	A	47	7.47	8.17		8.15007	46.5	44.4	38.3	38.1185	-0.374407	6.10618	-	XXXX	U1426A-2H-4A, 47.0cm		2
346	U1426	A	2	H	4	A	47.5	7.475	8.175		8.15507	46.1	43.9	37.7	37.8602	-0.348784	6.2394	-	XXXX	U1426A-2H-4A, 47.5cm		2
346	U1426	A	2	H	4	A	48	7.48	8.18		8.16007	47.5	45.2	38.8	38.5536	-0.342859	6.32157	-	XXXX	U1426A-2H-4A, 48.0cm		2
346	U1426	A	2	H	4	A	48.5	7.485	8.185		8.16507	48.1	45.8	39.3	38.8643	-0.365894	6.35666	-	XXXX	U1426A-2H-4A, 48.5cm		2
346	U1426	A	2	H	4	A	49	7.49	8.19		8.17007	47.3	45	38.4	38.4413	-0.393332	6.49353	-	XXXX	U1426A-2H-4A, 49.0cm		2
346	U1426	A	2	H	4	A	49.5	7.495	8.195		8.17507	45.5	43	36.5	37.4012	-0.268084	6.60391	-	XXXX	U1426A-2H-4A, 49.5cm		2
346	U1426	A	2	H	4	A	50	7.5	8.2		8.18007	45.1	42.8	36.5	37.2765	-0.324348	6.42047	-	XXXX	U1426A-2H-4A, 50.0cm		2
346	U1426	A	2	H	4	A	50.5	7.505	8.205		8.18507	41.5	39	33.6	35.2228	0.0184963	6.00416	-	XXXX	U1426A-2H-4A, 50.5cm		2
346	U1426	A	2	H	4	A	51	7.51	8.21		8.19007	43.1	40.6	35	36.1172	-0.0366466	6.05069	-	XXXX	U1426A-2H-4A, 51.0cm		2
346	U1426	A	2	H	4	A	51.5	7.515	8.215		8.19507	42.2	39.5	33.8	35.5203	0.0493643	6.25823	-	XXXX	U1426A-2H-4A, 51.5cm		2
346	U1426	A	2	H	4	A	52	7.52	8.22		8.20007	41.6	38.9	33.4	35.187	0.104272	6.13614	-	XXXX	U1426A-2H-4A, 52.0cm		2
346	U1426	A	2	H	4	A	52.5	7.525	8.225		8.20507	40.7	38	32.6	34.674	0.134181	6.12229	-	XXXX	U1426A-2H-4A, 52.5cm		2
346	U1426	A	2	H	4	A	53	7.53	8.23		8.21007	39.6	36.7	31	33.9294	0.172853	6.53596	-	XXXX	U1426A-2H-4A, 53.0cm		2
346	U1426	A	2	H	4	A	53.5	7.535	8.235		8.21507	42.4	39.7	33.7	35.622	-0.0304466	6.49594	-	XXXX	U1426A-2H-4A, 53.5cm		2
346	U1426	A	2	H	4	A	54	7.54	8.24		8.22007	41.7	38.8	32.7	35.1322	0.0569586	6.69764	-	XXXX	U1426A-2H-4A, 54.0cm		2
346	U1426	A	2	H	4	A	54.5	7.545	8.245		8.22507	39.5	36.3	30.5	33.7284	0.322548	6.72285	-	XXXX	U1426A-2H-4A, 54.5cm		2
346	U1426	A	2	H	4	A	55	7.55	8.25		8.23007	39.3	36	30	33.5556	0.328453	6.95197	-	XXXX	U1426A-2H-4A, 55.0cm		2
346	U1426	A	2	H	4	A	55.5	7.555	8.255		8.23507	39.8	36.5	30.3	33.8441	0.270178	7.08196	-	XXXX	U1426A-2H-4A, 55.5cm		2
346	U1426	A	2	H	4	A	56	7.56	8.26		8.24007	38.1	34.7	29	32.7999	0.482347	6.82921	-	XXXX	U1426A-2H-4A, 56.0cm		2
346	U1426	A	2	H	4	A	56.5	7.565	8.265		8.24507	37.1	33.6	28	32.1444	0.58322	6.86997	-	XXXX	U1426A-2H-4A, 56.5cm		2
346	U1426	A	2	H	4	A	57	7.57	8.27		8.25007	41.1	37.7	31.5	34.5589	0.319532	6.98455	-	XXXX	U1426A-2H-4A, 57.0cm		2
346	U1426	A	2	H	4	A	57.5	7.575	8.275		8.25507	39	35.7	30.1	33.3926	0.441082	6.62028	-	XXXX	U1426A-2H-4A, 57.5cm		2
346	U1426	A	2	H	4	A	58	7.58	8.28		8.26007	36.1	32.8	27.5	31.6317	0.556069	6.62689	-	XXXX	U1426A-2H-4A, 58.0cm		2
346	U1426	A	2	H	4	A	58.5	7.585	8.285		8.26507	34.7	31.3	25.9	30.6906	0.608805	6.90531	-	XXXX	U1426A-2H-4A, 58.5cm		2
346	U1426	A	2	H	4	A	59	7.59	8.29		8.27007	36.6	33.1	27.6	31.8385	0.618005	6.82813	-	XXXX	U1426A-2H-4A, 59.0cm		2
346	U1426	A	2	H	4	A	59.5	7.595	8.295		8.27507	39.5	35.9	29.7	33.5278	0.45063	7.20439	-	XXXX	U1426A-2H-4A, 59.5cm		2
346	U1426	A	2	H	4	A	60	7.6	8.3		8.28007	39.1	35.5	29.5	33.2969	0.509585	7.06401	-	XXXX	U1426A-2H-4A, 60.0cm		2
346	U1426	A	2	H	4	A	60.5	7.605	8.305		8.28507	37.6	33.8	27.8	32.2925	0.650062	7.28754	-	XXXX	U1426A-2H-4A, 60.5cm		2
346	U1426	A	2	H	4	A	61	7.61	8.31		8.29007	36.5	32.7	26.9	31.6182	0.722739	7.22173	-	XXXX	U1426A-2H-4A, 61.0cm		2
346	U1426	A	2	H	4	A	61.5	7.615	8.315		8.29507	36.4	32.6	26.9	31.5596	0.752828	7.13732	-	XXXX	U1426A-2H-4A, 61.5cm		2
346	U1426	A	2	H	4	A	62	7.62	8.32		8.30007	35.9	32.1	26.4	31.2447	0.760943	7.19419	-	XXXX	U1426A-2H-4A, 62.0cm		2
346	U1426	A	2	H	4	A	62.5	7.625	8.325		8.30507	35.7	32	26.2	31.1632	0.671321	7.28079	-	XXXX	U1426A-2H-4A, 62.5cm		2
346	U1426	A	2	H	4	A	63	7.63	8.33		8.31007	33.5	30	24.4	29.852	0.632744	7.28021	-	XXXX	U1426A-2H-4A, 63.0cm		2
346	U1426	A	2	H	4	A	63.5	7.635	8.335		8.31507	35.3	31.5	25.8	30.8633	0.770988	7.26431	-	XXXX	U1426A-2H-4A, 63.5cm		2
346	U1426	A	2	H	4	A	64	7.64	8.34		8.32007	36.4	32.4	26.3	31.4456	0.76592	7.58913	-	XXXX	U1426A-2H-4A, 64.0cm		2
346	U1426	A	2	H	4	A	64.5	7.645	8.345		8.32507	36.6	32.6	26.4	31.5671	0.734198	7.66131	-	XXXX	U1426A-2H-4A, 64.5cm		2
346	U1426	A	2	H	4	A	65	7.65	8.35		8.33007	36.8	32.7	26.4	31.6396	0.766029	7.76712	-	XXXX	U1426A-2H-4A, 65.0cm		2
346	U1426	A	2	H	4	A	65.5	7.655	8.355		8.33507	36.3	32.4	25.9	31.4152	0.589989	7.95579	-	XXXX	U1426A-2H-4A, 65.5cm		2
346	U1426	A	2	H	4	A	66	7.66	8.36		8.34007	37.3	33.3	27	31.9993	0.694933	7.67211	-	XXXX	U1426A-2H-4A, 66.0cm		2
346	U1426	A	2	H	4	A	66.5	7.665	8.365		8.34507	37.4	33.4	27	32.0571	0.665371	7.75534	-	XXXX	U1426A-2H-4A, 66.5cm		2
346	U1426	A	2	H	4	A	67	7.67	8.37		8.35007	36.3	32.6	26.6	31.5333	0.605362	7.40355	-	XXXX	U1426A-2H-4A, 67.0cm		2
346	U1426	A	2	H	4	A	67.5	7.675	8.375		8.35507	35.8	32.2	26.6	31.2839	0.663569	7.04263	-	XXXX	U1426A-2H-4A, 67.5cm		2
346	U1426	A	2	H	4	A	68	7.68	8.38		8.36007	35.4	31.9	26.4	31.0839	0.634295	6.95766	-	XXXX	U1426A-2H-4A, 68.0cm		2
346	U1426	A	2	H	4	A	68.5	7.685	8.385		8.36507	38.6	35.6	29.9	33.2891	0.237285	6.65832	-	XXXX	U1426A-2H-4A, 68.5cm		2
346	U1426	A	2	H	4	A	69	7.69	8.39		8.37007	41.2	38.6	32.7	34.9876	-0.0586777	6.484	-	XXXX	U1426A-2H-4A, 69.0cm		2
346	U1426	A	2	H	4	A	69.5	7.695	8.395		8.37507	42.2	39.7	33.5	35.5897	-0.194851	6.62701	-	XXXX	U1426A-2H-4A, 69.5cm		2
346	U1426	A	2	H	4	A	70	7.7	8.4		8.38007	42.9	40.3	34	35.9358	-0.165222	6.67954	-	XXXX	U1426A-2H-4A, 70.0cm		2
346	U1426	A	2	H	4	A	70.5	7.705	8.405		8.38507	43.6	40.9	34.3	36.2715	-0.188144	6.89884	-	XXXX	U1426A-2H-4A, 70.5cm		2
346	U1426	A	2	H	4	A	71	7.71	8.41		8.39007	44.1	41.4	34.9	36.5518	-0.162007	6.77234	-	XXXX	U1426A-2H-4A, 71.0cm		2
346	U1426	A	2	H	4	A	71.5	7.715	8.415		8.39507	45.1	42.5	35.8	37.1348	-0.266404	6.82607	-	XXXX	U1426A-2H-4A, 71.5cm		2
346	U1426	A	2	H	4	A	72	7.72	8.42		8.40007	45.8	43	36.2	37.4259	-0.184254	6.90289	-	XXXX	U1426A-2H-4A, 72.0cm		2
346	U1426	A	2	H	4	A	72.5	7.725	8.425		8.40507	46.1	43.5	36.4	37.6607	-0.365677	7.06756	-	XXXX	U1426A-2H-4A, 72.5cm		2
346	U1426	A	2	H	4	A	73	7.73	8.43		8.41007	46.5	44	37	37.9201	-0.391967	6.92664	-	XXXX	U1426A-2H-4A, 73.0cm		2
346	U1426	A	2	H	4	A	73.5	7.735	8.435		8.41507	46.3	43.8	37	37.8204	-0.342246	6.78213	-	XXXX	U1426A-2H-4A, 73.5cm		2
346	U1426	A	2	H	4	A	74	7.74	8.44		8.42007	45.9	43.4	36.7	37.6095	-0.318	6.73378	-	XXXX	U1426A-2H-4A, 74.0cm		2
346	U1426	A	2	H	4	A	74.5	7.745	8.445		8.42507	45.6	43.2	36.6	37.4937	-0.346344	6.65059	-	XXXX	U1426A-2H-4A, 74.5cm		2
346	U1426	A	2	H	4	A	75	7.75	8.45		8.43007	45.7	43.3	36.6	37.5439	-0.371435	6.7235	-	XXXX	U1426A-2H-4A, 75.0cm		2
346	U1426	A	2	H	4	A	75.5	7.755	8.455		8.43507	45.2	42.8	36.3	37.2811	-0.321955	6.60136	-	XXXX	U1426A-2H-4A, 75.5cm		2
346	U1426	A	2	H	4	A	76	7.76	8.46		8.44007	45.4	43.1	36.8	37.4387	-0.323529	6.39748	-	XXXX	U1426A-2H-4A, 76.0cm		2
346	U1426	A	2	H	4	A	76.5	7.765	8.465		8.44507	45.7	43.3	36.7	37.5475	-0.34606	6.64263	-	XXXX	U1426A-2H-4A, 76.5cm		2
346	U1426	A	2	H	4	A	77	7.77	8.47		8.45007	45.4	43.1	36.7	37.4351	-0.349023	6.47828	-	XXXX	U1426A-2H-4A, 77.0cm		2
346	U1426	A	2	H	4	A	77.5	7.775	8.475		8.45507	46.5	44.1	37.5	37.976	-0.343814	6.57995	-	XXXX	U1426A-2H-4A, 77.5cm		2
346	U1426	A	2	H	4	A	78	7.78	8.48		8.46007	47.2	44.8	38.2	38.3473	-0.34188	6.52652	-	XXXX	U1426A-2H-4A, 78.0cm		2
346	U1426	A	2	H	4	A	78.5	7.785	8.485		8.46507	47.4	45	38.3	38.4493	-0.366239	6.59039	-	XXXX	U1426A-2H-4A, 78.5cm		2
346	U1426	A	2	H	4	A	79	7.79	8.49		8.47007	47.4	44.9	38.1	38.4046	-0.339373	6.6951	-	XXXX	U1426A-2H-4A, 79.0cm		2
346	U1426	A	2	H	4	A	79.5	7.795	8.495		8.47507	47.4	44.9	38	38.4011	-0.364258	6.77431	-	XXXX	U1426A-2H-4A, 79.5cm		2
346	U1426	A	2	H	4	A	80	7.8	8.5		8.48007	48.5	46	39	38.9738	-0.385742	6.76736	-	XXXX	U1426A-2H-4A, 80.0cm		2
346	U1426	A	2	H	4	A	80.5	7.805	8.505		8.48507	48.9	46.5	39.5	39.2219	-0.435298	6.71158	-	XXXX	U1426A-2H-4A, 80.5cm		2
346	U1426	A	2	H	4	A	81	7.81	8.51		8.49007	48.5	46.1	39.2	39.0179	-0.412185	6.66399	-	XXXX	U1426A-2H-4A, 81.0cm		2
346	U1426	A	2	H	4	A	81.5	7.815	8.515		8.49507	48.5	46.1	39.3	39.0214	-0.387588	6.5861	-	XXXX	U1426A-2H-4A, 81.5cm		2
346	U1426	A	2	H	4	A	82	7.82	8.52		8.50007	49.3	47.1	40.2	39.5122	-0.510191	6.55484	-	XXXX	U1426A-2H-4A, 82.0cm		2
346	U1426	A	2	H	4	A	82.5	7.825	8.525		8.50507	48.8	46.5	39.7	39.2175	-0.43737	6.53895	-	XXXX	U1426A-2H-4A, 82.5cm		2
346	U1426	A	2	H	4	A	83	7.83	8.53		8.51007	48.4	46.3	39.7	39.0982	-0.491313	6.36323	-	XXXX	U1426A-2H-4A, 83.0cm		2
346	U1426	A	2	H	4	A	83.5	7.835	8.535		8.51507	48.8	46.6	39.9	39.2614	-0.463475	6.43679	-	XXXX	U1426A-2H-4A, 83.5cm		2
346	U1426	A	2	H	4	A	84	7.84	8.54		8.52007	48.9	46.6	39.8	39.2692	-0.436989	6.53165	-	XXXX	U1426A-2H-4A, 84.0cm		2
346	U1426	A	2	H	4	A	84.5	7.845	8.545		8.52507	48.1	45.8	39.1	38.8573	-0.415347	6.51262	-	XXXX	U1426A-2H-4A, 84.5cm		2
346	U1426	A	2	H	4	A	85	7.85	8.55		8.53007	46.8	44.5	37.9	38.177	-0.395052	6.53119	-	XXXX	U1426A-2H-4A, 85.0cm		2
346	U1426	A	2	H	4	A	85.5	7.855	8.555		8.53507	45.6	43.4	36.9	37.5814	-0.42666	6.5174	-	XXXX	U1426A-2H-4A, 85.5cm		2
346	U1426	A	2	H	4	A	86	7.86	8.56		8.54007	47.9	45.8	39.2	38.838	-0.493642	6.39906	-	XXXX	U1426A-2H-4A, 86.0cm		2
346	U1426	A	2	H	4	A	86.5	7.865	8.565		8.54507	47.8	45.5	38.7	38.6969	-0.441227	6.61331	-	XXXX	U1426A-2H-4A, 86.5cm		2
346	U1426	A	2	H	4	A	87	7.87	8.57		8.55007	46.9	44.6	38	38.23	-0.394706	6.52361	-	XXXX	U1426A-2H-4A, 87.0cm		2
346	U1426	A	2	H	4	A	87.5	7.875	8.575		8.55507	46.3	43.7	37.1	37.7858	-0.239213	6.6476	-	XXXX	U1426A-2H-4A, 87.5cm		2
346	U1426	A	2	H	4	A	88	7.88	8.58		8.56007	44.5	41.8	35.4	36.7755	-0.136148	6.65624	-	XXXX	U1426A-2H-4A, 88.0cm		2
346	U1426	A	2	H	4	A	88.5	7.885	8.585		8.56507	44.1	41.5	35.2	36.6022	-0.164667	6.57944	-	XXXX	U1426A-2H-4A, 88.5cm		2
346	U1426	A	2	H	4	A	89	7.89	8.59		8.57007	45.3	42.7	36.3	37.2543	-0.189585	6.56498	-	XXXX	U1426A-2H-4A, 89.0cm		2
346	U1426	A	2	H	4	A	89.5	7.895	8.595		8.57507	44.1	41.3	34.8	36.5088	-0.107505	6.7997	-	XXXX	U1426A-2H-4A, 89.5cm		2
346	U1426	A	2	H	4	A	90	7.9	8.6		8.58007	39.5	36.4	30.6	33.7745	0.263523	6.69311	-	XXXX	U1426A-2H-4A, 90.0cm		2
346	U1426	A	2	H	4	A	90.5	7.905	8.605		8.58507	40.5	37.6	31.8	34.4522	0.141678	6.54355	-	XXXX	U1426A-2H-4A, 90.5cm		2
346	U1426	A	2	H	4	A	91	7.91	8.61		8.59007	41.9	39	33	35.2501	0.0829698	6.59424	-	XXXX	U1426A-2H-4A, 91.0cm		2
346	U1426	A	2	H	4	A	91.5	7.915	8.615		8.59507	38	35	29.5	32.936	0.29689	6.53356	-	XXXX	U1426A-2H-4A, 91.5cm		2
346	U1426	A	2	H	4	A	92	7.92	8.62		8.60007	37.4	34.4	29.3	32.5876	0.414131	6.22344	-	XXXX	U1426A-2H-4A, 92.0cm		2
346	U1426	A	2	H	4	A	92.5	7.925	8.625		8.60507	35.7	32.7	27.7	31.5398	0.458561	6.28824	-	XXXX	U1426A-2H-4A, 92.5cm		2
346	U1426	A	2	H	4	A	93	7.93	8.63		8.61007	35	32	27.4	31.1146	0.582873	5.97468	-	XXXX	U1426A-2H-4A, 93.0cm		2
346	U1426	A	2	H	4	A	93.5	7.935	8.635		8.61507	34	31	26.4	30.474	0.595264	6.06833	-	XXXX	U1426A-2H-4A, 93.5cm		2
346	U1426	A	2	H	4	A	94	7.94	8.64		8.62007	35.5	32.4	27.6	31.3733	0.581824	6.14924	-	XXXX	U1426A-2H-4A, 94.0cm		2
346	U1426	A	2	H	4	A	94.5	7.945	8.645		8.62507	34.4	31.1	26.3	30.573	0.724917	6.31954	-	XXXX	U1426A-2H-4A, 94.5cm		2
346	U1426	A	2	H	4	A	95	7.95	8.65		8.63007	34.3	31	26	30.5	0.667312	6.5247	-	XXXX	U1426A-2H-4A, 95.0cm		2
346	U1426	A	2	H	4	A	95.5	7.955	8.655		8.63507	34.6	31.4	26.5	30.7474	0.627865	6.36405	-	XXXX	U1426A-2H-4A, 95.5cm		2
346	U1426	A	2	H	4	A	96	7.96	8.66		8.64007	34.5	31.1	26.2	30.5831	0.75875	6.43906	-	XXXX	U1426A-2H-4A, 96.0cm		2
346	U1426	A	2	H	4	A	96.5	7.965	8.665		8.64507	34.8	31.5	26.4	30.8172	0.630807	6.56952	-	XXXX	U1426A-2H-4A, 96.5cm		2
346	U1426	A	2	H	4	A	97	7.97	8.67		8.65007	33.5	30.1	25.1	29.9288	0.745393	6.64435	-	XXXX	U1426A-2H-4A, 97.0cm		2
346	U1426	A	2	H	4	A	97.5	7.975	8.675		8.65507	34	30.6	25.6	30.2553	0.737218	6.58972	-	XXXX	U1426A-2H-4A, 97.5cm		2
346	U1426	A	2	H	4	A	98	7.98	8.68		8.66007	33.1	29.8	24.7	29.7124	0.655337	6.75532	-	XXXX	U1426A-2H-4A, 98.0cm		2
346	U1426	A	2	H	4	A	98.5	7.985	8.685		8.66507	31.9	28.6	23.6	28.9157	0.704876	6.79393	-	XXXX	U1426A-2H-4A, 98.5cm		2
346	U1426	A	2	H	4	A	99	7.99	8.69		8.67007	33.7	30.3	25.2	30.0555	0.712294	6.72156	-	XXXX	U1426A-2H-4A, 99.0cm		2
346	U1426	A	2	H	4	A	99.5	7.995	8.695		8.67507	33.8	30.4	25.2	30.1165	0.680966	6.80963	-	XXXX	U1426A-2H-4A, 99.5cm		2
346	U1426	A	2	H	4	A	100	8	8.7		8.68007	35.9	32.4	27.1	31.4085	0.684985	6.71152	-	XXXX	U1426A-2H-4A, 100.0cm		2
346	U1426	A	2	H	4	A	100.5	8.005	8.705		8.68507	33.1	29.8	24.8	29.7167	0.685412	6.65501	-	XXXX	U1426A-2H-4A, 100.5cm		2
346	U1426	A	2	H	4	A	101	8.01	8.71		8.69007	32.7	29.5	24.9	29.5208	0.745942	6.26393	-	XXXX	U1426A-2H-4A, 101.0cm		2
346	U1426	A	2	H	4	A	101.5	8.015	8.715		8.69507	30.3	27.2	22.9	27.9581	0.812951	6.18096	-	XXXX	U1426A-2H-4A, 101.5cm		2
346	U1426	A	2	H	4	A	102	8.02	8.72		8.70007	29.5	26.4	22	27.3935	0.79665	6.37891	-	XXXX	U1426A-2H-4A, 102.0cm		2
346	U1426	A	2	H	4	A	102.5	8.025	8.725		8.70507	28.9	25.7	21.2	26.907	0.849001	6.59801	-	XXXX	U1426A-2H-4A, 102.5cm		2
346	U1426	A	2	H	4	A	103	8.03	8.73		8.71007	28.3	25.3	20.7	26.5822	0.682434	6.70999	-	XXXX	U1426A-2H-4A, 103.0cm		2
346	U1426	A	2	H	4	A	103.5	8.035	8.735		8.71507	29.1	26	21.6	27.1099	0.804609	6.42711	-	XXXX	U1426A-2H-4A, 103.5cm		2
346	U1426	A	2	H	4	A	104	8.04	8.74		8.72007	29.7	26.5	22	27.4751	0.832173	6.49843	-	XXXX	U1426A-2H-4A, 104.0cm		2
346	U1426	A	2	H	4	A	104.5	8.045	8.745		8.72507	29.7	26.5	22	27.4751	0.832173	6.49843	-	XXXX	U1426A-2H-4A, 104.5cm		2
346	U1426	A	2	H	4	A	105	8.05	8.75		8.73007	30	26.9	22.4	27.74	0.755267	6.42621	-	XXXX	U1426A-2H-4A, 105.0cm		2
346	U1426	A	2	H	4	A	105.5	8.055	8.755		8.73507	31.3	28.1	23.3	28.5702	0.708028	6.62317	-	XXXX	U1426A-2H-4A, 105.5cm		2
346	U1426	A	2	H	4	A	106	8.06	8.76		8.74007	31.7	28.2	23.2	28.675	0.845841	6.88945	-	XXXX	U1426A-2H-4A, 106.0cm		2
346	U1426	A	2	H	4	A	106.5	8.065	8.765		8.74507	31.9	28.4	23.3	28.8063	0.811246	6.96841	-	XXXX	U1426A-2H-4A, 106.5cm		2
346	U1426	A	2	H	4	A	107	8.07	8.77		8.75007	31.9	28.3	23	28.7448	0.818909	7.21246	-	XXXX	U1426A-2H-4A, 107.0cm		2
346	U1426	A	2	H	4	A	107.5	8.075	8.775		8.75507	32.5	28.9	23.4	29.1408	0.746724	7.3416	-	XXXX	U1426A-2H-4A, 107.5cm		2
346	U1426	A	2	H	4	A	108	8.08	8.78		8.76007	32.4	28.8	23.5	29.0824	0.809147	7.14822	-	XXXX	U1426A-2H-4A, 108.0cm		2
346	U1426	A	2	H	4	A	108.5	8.085	8.785		8.76507	31	27.4	22.4	28.1423	0.93035	7.01437	-	XXXX	U1426A-2H-4A, 108.5cm		2
346	U1426	A	2	H	4	A	109	8.09	8.79		8.77007	31.5	28	22.9	28.5343	0.819063	7.01871	-	XXXX	U1426A-2H-4A, 109.0cm		2
346	U1426	A	2	H	4	A	109.5	8.095	8.795		8.77507	31.1	27.6	22.6	28.2647	0.858084	6.96473	-	XXXX	U1426A-2H-4A, 109.5cm		2
346	U1426	A	2	H	4	A	110	8.1	8.8		8.78007	31.2	27.7	22.8	28.3379	0.886987	6.84702	-	XXXX	U1426A-2H-4A, 110.0cm		2
346	U1426	A	2	H	4	A	110.5	8.105	8.805		8.78507	32.5	29	23.9	29.2103	0.799886	6.89507	-	XXXX	U1426A-2H-4A, 110.5cm		2
346	U1426	A	2	H	4	A	111	8.11	8.81		8.79007	36.1	32.7	27.4	31.583	0.619006	6.65873	-	XXXX	U1426A-2H-4A, 111.0cm		2
346	U1426	A	2	H	4	A	111.5	8.115	8.815		8.79507	34.7	31.7	27.2	30.9279	0.615991	5.90672	-	XXXX	U1426A-2H-4A, 111.5cm		2
346	U1426	A	2	H	4	A	112	8.12	8.82		8.80007	36.1	33	28.3	31.7538	0.603556	6.00033	-	XXXX	U1426A-2H-4A, 112.0cm		2
346	U1426	A	2	H	4	A	112.5	8.125	8.825		8.80507	40.9	38	32.4	34.6917	0.193961	6.33493	-	XXXX	U1426A-2H-4A, 112.5cm		2
346	U1426	A	2	H	4	A	113	8.13	8.83		8.81007	43.7	40.8	34.2	36.2403	-0.078325	6.94563	-	XXXX	U1426A-2H-4A, 113.0cm		2
346	U1426	A	2	H	4	A	113.5	8.135	8.835		8.81507	44.8	41.6	34.8	36.7115	0.0323031	7.09835	-	XXXX	U1426A-2H-4A, 113.5cm		2
346	U1426	A	2	H	4	A	114	8.14	8.84		8.82007	46.9	43.9	36.6	37.9146	-0.203507	7.26795	-	XXXX	U1426A-2H-4A, 114.0cm		2
346	U1426	A	2	H	4	A	114.5	8.145	8.845		8.82507	48.7	45.6	38	38.813	-0.224609	7.37843	-	XXXX	U1426A-2H-4A, 114.5cm		2
346	U1426	A	2	H	4	A	115	8.15	8.85		8.83007	49	45.9	38.1	38.9625	-0.273183	7.51055	-	XXXX	U1426A-2H-4A, 115.0cm		2
346	U1426	A	2	H	4	A	115.5	8.155	8.855		8.83507	48.3	45.3	38	38.655	-0.202875	7.14847	-	XXXX	U1426A-2H-4A, 115.5cm		2
346	U1426	A	2	H	4	A	116	8.16	8.86		8.84007	48.2	45.2	37.8	38.599	-0.227537	7.23616	-	XXXX	U1426A-2H-4A, 116.0cm		2
346	U1426	A	2	H	4	A	116.5	8.165	8.865		8.84507	46.8	43.9	37	37.9171	-0.156212	6.92731	-	XXXX	U1426A-2H-4A, 116.5cm		2
346	U1426	A	2	H	4	A	117	8.17	8.87		8.85007	46.2	43.3	36.4	37.5958	-0.156237	6.97733	-	XXXX	U1426A-2H-4A, 117.0cm		2
346	U1426	A	2	H	4	A	117.5	8.175	8.875		8.85507	48.5	45.6	38.2	38.797	-0.278851	7.18468	-	XXXX	U1426A-2H-4A, 117.5cm		2
346	U1426	A	2	H	4	A	118	8.18	8.88		8.86007	49.8	46.7	39	39.3802	-0.248135	7.36353	-	XXXX	U1426A-2H-4A, 118.0cm		2
346	U1426	A	2	H	4	A	118.5	8.185	8.885		8.86507	49.7	46.6	38.8	39.3252	-0.272417	7.45012	-	XXXX	U1426A-2H-4A, 118.5cm		2
346	U1426	A	2	H	4	A	119	8.19	8.89		8.87007	49.2	46.1	38.5	39.0733	-0.224316	7.33578	-	XXXX	U1426A-2H-4A, 119.0cm		2
346	U1426	A	2	H	4	A	119.5	8.195	8.895		8.87507	48.4	45.3	38	38.6665	-0.151126	7.16636	-	XXXX	U1426A-2H-4A, 119.5cm		2
346	U1426	A	2	H	4	A	120	8.2	8.9		8.88007	47.8	44.8	37.4	38.3886	-0.227828	7.27028	-	XXXX	U1426A-2H-4A, 120.0cm		2
346	U1426	A	2	H	4	A	120.5	8.205	8.905		8.88507	48.3	45.2	37.7	38.6071	-0.20027	7.33353	-	XXXX	U1426A-2H-4A, 120.5cm		2
346	U1426	A	2	H	4	A	121	8.21	8.91		8.89007	48.6	45.6	38	38.8015	-0.276238	7.3606	-	XXXX	U1426A-2H-4A, 121.0cm		2
346	U1426	A	2	H	4	A	121.5	8.215	8.915		8.89507	48.6	45.5	37.9	38.7608	-0.224667	7.38704	-	XXXX	U1426A-2H-4A, 121.5cm		2
346	U1426	A	2	H	4	A	122	8.22	8.92		8.90007	48.2	45.1	37.7	38.5581	-0.175698	7.26259	-	XXXX	U1426A-2H-4A, 122.0cm		2
346	U1426	A	2	H	4	A	122.5	8.225	8.925		8.90507	48.5	45.4	37.9	38.7119	-0.200208	7.31637	-	XXXX	U1426A-2H-4A, 122.5cm		2
346	U1426	A	2	H	4	A	123	8.23	8.93		8.91007	49.3	46.1	38.4	39.0813	-0.197356	7.43213	-	XXXX	U1426A-2H-4A, 123.0cm		2
346	U1426	A	2	H	4	A	123.5	8.235	8.935		8.91507	48.4	45.4	37.8	38.6969	-0.276488	7.37782	-	XXXX	U1426A-2H-4A, 123.5cm		2
346	U1426	A	2	H	4	A	124	8.24	8.94		8.92007	48.4	45.4	38.1	38.7074	-0.202827	7.14015	-	XXXX	U1426A-2H-4A, 124.0cm		2
346	U1426	A	2	H	4	A	124.5	8.245	8.945		8.92507	47.2	44.4	37.3	38.1643	-0.258339	7.02816	-	XXXX	U1426A-2H-4A, 124.5cm		2
346	U1426	A	2	H	4	A	125	8.25	8.95		8.93007	47.4	44.5	37.4	38.229	-0.205895	7.03794	-	XXXX	U1426A-2H-4A, 125.0cm		2
346	U1426	A	2	H	4	A	125.5	8.255	8.955		8.93507	47.7	44.8	37.5	38.3805	-0.255234	7.17246	-	XXXX	U1426A-2H-4A, 125.5cm		2
346	U1426	A	2	H	4	A	126	8.26	8.96		8.94007	46.8	43.8	36.8	37.8719	-0.128532	7.03439	-	XXXX	U1426A-2H-4A, 126.0cm		2
346	U1426	A	2	H	4	A	126.5	8.265	8.965		8.94507	47	44	36.9	37.975	-0.153571	7.09804	-	XXXX	U1426A-2H-4A, 126.5cm		2
346	U1426	A	2	H	4	A	127	8.27	8.97		8.95007	47.4	44.4	37.3	38.1876	-0.153609	7.06437	-	XXXX	U1426A-2H-4A, 127.0cm		2
346	U1426	A	2	H	4	A	127.5	8.275	8.975		8.95507	46	42.9	36	37.4039	-0.0495544	7.04822	-	XXXX	U1426A-2H-4A, 127.5cm		2
346	U1426	A	2	H	4	A	128	8.28	8.98		8.96007	45.4	42.4	35.8	37.1319	-0.0261952	6.82685	-	XXXX	U1426A-2H-4A, 128.0cm		2
346	U1426	A	2	H	4	A	128.5	8.285	8.985		8.96507	44.3	41.3	35	36.5404	0.0530261	6.67133	-	XXXX	U1426A-2H-4A, 128.5cm		2
346	U1426	A	2	H	4	A	129	8.29	8.99		8.97007	41.7	38.6	32.7	35.0506	0.223833	6.58218	-	XXXX	U1426A-2H-4A, 129.0cm		2
346	U1426	A	2	H	4	A	129.5	8.295	8.995		8.97507	41.4	38.2	32.2	34.8299	0.255929	6.72379	-	XXXX	U1426A-2H-4A, 129.5cm		2
346	U1426	A	2	H	4	A	130	8.3	9		8.98007	39	35.8	30.5	33.4509	0.464328	6.32106	-	XXXX	U1426A-2H-4A, 130.0cm		2
346	U1426	A	2	H	4	A	130.5	8.305	9.005		8.98507	39.3	36.1	30.7	33.6255	0.434034	6.38384	-	XXXX	U1426A-2H-4A, 130.5cm		2
346	U1426	A	2	H	4	A	131	8.31	9.01		8.99007	38.8	35.6	30.3	33.3314	0.466186	6.33884	-	XXXX	U1426A-2H-4A, 131.0cm		2
346	U1426	A	2	H	4	A	131.5	8.315	9.015		8.99507	36.2	33.1	28.1	31.8038	0.51597	6.27181	-	XXXX	U1426A-2H-4A, 131.5cm		2
346	U1426	A	2	H	4	A	132	8.32	9.02		9.00007	38	34.9	29.8	32.9049	0.469373	6.19972	-	XXXX	U1426A-2H-4A, 132.0cm		2
346	U1426	A	2	H	4	A	132.5	8.325	9.025		9.00507	40.2	36.9	31.2	34.0989	0.403224	6.59861	-	XXXX	U1426A-2H-4A, 132.5cm		2
346	U1426	A	2	H	4	A	133	8.33	9.03		9.01007	40.7	37.3	31.2	34.3303	0.349381	6.93476	-	XXXX	U1426A-2H-4A, 133.0cm		2
346	U1426	A	2	H	4	A	133.5	8.335	9.035		9.01507	36.9	33.7	28.7	32.1895	0.570243	6.23732	-	XXXX	U1426A-2H-4A, 133.5cm		2
346	U1426	A	2	H	4	A	134	8.34	9.04		9.02007	36.5	33.5	28.7	32.0467	0.508119	6.02748	-	XXXX	U1426A-2H-4A, 134.0cm		2
346	U1426	A	2	H	4	A	134.5	8.345	9.045		9.02507	37	33.9	29.2	32.3112	0.592941	5.92163	-	XXXX	U1426A-2H-4A, 134.5cm		2
346	U1426	A	2	H	4	A	135	8.35	9.05		9.03007	34.2	31.2	26.8	30.6116	0.652129	5.85632	-	XXXX	U1426A-2H-4A, 135.0cm		2
346	U1426	A	2	H	4	A	135.5	8.355	9.055		9.03507	33.2	30.1	25.7	29.9109	0.731955	5.98208	-	XXXX	U1426A-2H-4A, 135.5cm		2
346	U1426	A	2	H	4	A	136	8.36	9.06		9.04007	34	30.7	25.6	30.3015	0.642044	6.65492	-	XXXX	U1426A-2H-4A, 136.0cm		2
346	U1426	A	2	H	4	A	136.5	8.365	9.065		9.04507	35	31.8	26.9	31.003	0.62253	6.32414	-	XXXX	U1426A-2H-4A, 136.5cm		2
346	U1426	A	2	H	4	A	137	8.37	9.07		9.05007	35.5	32.1	27	31.2133	0.685026	6.52954	-	XXXX	U1426A-2H-4A, 137.0cm		2
346	U1426	A	2	H	4	A	137.5	8.375	9.075		9.05507	33.3	30.1	25.4	29.9125	0.706156	6.30107	-	XXXX	U1426A-2H-4A, 137.5cm		2
346	U1426	A	2	H	4	A	138	8.38	9.08		9.06007	34.1	30.9	26	30.4253	0.634708	6.41508	-	XXXX	U1426A-2H-4A, 138.0cm		2
346	U1426	A	2	H	4	A	138.5	8.385	9.085		9.06507	32.9	29.8	25.1	29.7003	0.645851	6.30953	-	XXXX	U1426A-2H-4A, 138.5cm		2
346	U1426	A	2	H	4	A	139	8.39	9.09		9.07007	33.2	30.1	25.2	29.8893	0.58137	6.4768	-	XXXX	U1426A-2H-4A, 139.0cm		2
346	U1426	A	2	H	4	A	139.5	8.395	9.095		9.07507	30.3	27.3	23	28.012	0.742839	6.14587	-	XXXX	U1426A-2H-4A, 139.5cm		2
346	U1426	A	2	H	4	A	140	8.4	9.1		9.08007	30.4	27.4	22.7	28.0631	0.615021	6.55407	-	XXXX	U1426A-2H-4A, 140.0cm		2
346	U1426	A	2	H	4	A	140.5	8.405	9.105		9.08507	31.7	28.6	24.1	28.9078	0.725545	6.23503	-	XXXX	U1426A-2H-4A, 140.5cm		2
346	U1426	A	2	H	4	A	141	8.41	9.11		9.09007	32.5	29.3	24.6	29.3835	0.718823	6.38563	-	XXXX	U1426A-2H-4A, 141.0cm		2
346	U1426	A	2	H	4	A	141.5	8.415	9.115		9.09507	33.9	30.4	25.1	30.1267	0.71559	6.93158	-	XXXX	U1426A-2H-4A, 141.5cm		2
346	U1426	A	2	H	4	A	142	8.42	9.12		9.10007	29.7	26.7	22.4	27.5935	0.753597	6.21298	-	XXXX	U1426A-2H-4A, 142.0cm		2
346	U1426	A	2	H	4	A	142.5	8.425	9.125		9.10507	27.8	24.9	21	26.3086	0.84885	5.9622	-	XXXX	U1426A-2H-4A, 142.5cm		2
346	U1426	A	2	H	4	A	143	8.43	9.13		9.11007	27.9	25.1	21	26.4284	0.707033	6.13352	-	XXXX	U1426A-2H-4A, 143.0cm		2
346	U1426	A	2	H	4	A	143.5	8.435	9.135		9.11507	29	26.1	22.1	27.1679	0.791789	5.93587	-	XXXX	U1426A-2H-4A, 143.5cm		2
346	U1426	A	2	H	4	A	144	8.44	9.14		9.12007	29.6	26.7	22.7	27.5917	0.780515	5.87129	-	XXXX	U1426A-2H-4A, 144.0cm		2
346	U1426	A	2	H	4	A	144.5	8.445	9.145		9.12507	29.7	26.9	22.8	27.7116	0.676089	5.93113	-	XXXX	U1426A-2H-4A, 144.5cm		2
346	U1426	A	2	H	4	A	145	8.45	9.15		9.13007	30.1	27.2	23	27.9317	0.707913	6.02808	-	XXXX	U1426A-2H-4A, 145.0cm		2
346	U1426	A	2	H	4	A	145.5	8.455	9.155		9.13507	31	28	23.9	28.5029	0.793348	5.865	-	XXXX	U1426A-2H-4A, 145.5cm		2
346	U1426	A	2	H	4	A	146	8.46	9.16		9.14007	31.8	28.7	24.2	28.9752	0.723894	6.22435	-	XXXX	U1426A-2H-4A, 146.0cm		2
346	U1426	A	2	H	4	A	146.5	8.465	9.165		9.14507	32	28.9	24.6	29.1187	0.782083	6.00101	-	XXXX	U1426A-2H-4A, 146.5cm		2
346	U1426	A	2	H	4	A	147	8.47	9.17		9.15007	32	29.1	24.8	29.2229	0.64711	5.93465	-	XXXX	U1426A-2H-4A, 147.0cm		2
346	U1426	A	2	H	4	A	147.5	8.475	9.175		9.15507	30.5	27.6	23.7	28.2222	0.795994	5.67542	-	XXXX	U1426A-2H-4A, 147.5cm		2
346	U1426	A	2	H	4	A	148	8.48	9.18		9.16007	30.8	27.8	23.5	28.3569	0.734187	6.09171	-	XXXX	U1426A-2H-4A, 148.0cm		2
346	U1426	A	2	H	4	A	148.5	8.485	9.185		9.16507	31.1	28.1	23.5	28.5487	0.635617	6.36895	-	XXXX	U1426A-2H-4A, 148.5cm		2
346	U1426	A	2	H	4	A	149	8.49	9.19		9.17007	29.7	26.8	22.7	27.6572	0.746684	5.96608	-	XXXX	U1426A-2H-4A, 149.0cm		2
346	U1426	A	2	H	4	A	149.5	8.495	9.195		9.17507	34.3	31.4	28.9	30.8077	1.1532	4.02315	-	XXXX	U1426A-2H-4A, 149.5cm		2
346	U1426	A	2	H	5	A	0	8.5	9.2		9.18007	27.6	24.9	21.2	26.2856	0.771659	5.69197	-	XXXX	U1426A-2H-5A, 0.0cm	sub_sample_width 1.5 cm, median_filter_rank 0, data_decimate 100	2
346	U1426	A	2	H	5	A	0.5	8.505	9.205		9.18507	27.1	24.4	20.8	25.9234	0.815098	5.63622	-	XXXX	U1426A-2H-5A, 0.5cm		2
346	U1426	A	2	H	5	A	1	8.51	9.21		9.19007	29.4	26.6	23.1	27.529	0.874317	5.33161	-	XXXX	U1426A-2H-5A, 1.0cm		2
346	U1426	A	2	H	5	A	1.5	8.515	9.215		9.19507	31	27.9	24.3	28.4724	1.01908	5.3875	-	XXXX	U1426A-2H-5A, 1.5cm		2
346	U1426	A	2	H	5	A	2	8.52	9.22		9.20007	29.6	26.7	22.9	27.601	0.844681	5.66079	-	XXXX	U1426A-2H-5A, 2.0cm		2
346	U1426	A	2	H	5	A	2.5	8.525	9.225		9.20507	26.6	23.9	19.7	25.5229	0.62238	6.36949	-	XXXX	U1426A-2H-5A, 2.5cm		2
346	U1426	A	2	H	5	A	3	8.53	9.23		9.21007	26.5	23.8	19.5	25.4432	0.590308	6.49682	-	XXXX	U1426A-2H-5A, 3.0cm		2
346	U1426	A	2	H	5	A	3.5	8.535	9.235		9.21507	27	24.3	20.1	25.8204	0.615468	6.31779	-	XXXX	U1426A-2H-5A, 3.5cm		2
346	U1426	A	2	H	5	A	4	8.54	9.24		9.22007	27	24.3	20	25.8156	0.581947	6.43046	-	XXXX	U1426A-2H-5A, 4.0cm		2
346	U1426	A	2	H	5	A	4.5	8.545	9.245		9.22507	27	24.2	20.1	25.7677	0.724034	6.24361	-	XXXX	U1426A-2H-5A, 4.5cm		2
346	U1426	A	2	H	5	A	5	8.55	9.25		9.23007	27	24.2	20	25.7629	0.690493	6.35631	-	XXXX	U1426A-2H-5A, 5.0cm		2
346	U1426	A	2	H	5	A	5.5	8.555	9.255		9.23507	27.6	24.9	20.7	26.2617	0.605483	6.24277	-	XXXX	U1426A-2H-5A, 5.5cm		2
346	U1426	A	2	H	5	A	6	8.56	9.26		9.24007	27.2	24.5	20.6	25.9826	0.712449	5.95778	-	XXXX	U1426A-2H-5A, 6.0cm		2
346	U1426	A	2	H	5	A	6.5	8.565	9.265		9.24507	27.9	25.2	21	26.4801	0.600654	6.20634	-	XXXX	U1426A-2H-5A, 6.5cm		2
346	U1426	A	2	H	5	A	7	8.57	9.27		9.25007	27.8	25	20.9	26.3557	0.708868	6.14544	-	XXXX	U1426A-2H-5A, 7.0cm		2
346	U1426	A	2	H	5	A	7.5	8.575	9.275		9.25507	27.4	24.7	20.6	26.1201	0.642066	6.15623	-	XXXX	U1426A-2H-5A, 7.5cm		2
346	U1426	A	2	H	5	A	8	8.58	9.28		9.26007	27.6	24.8	20.7	26.2097	0.712578	6.1695	-	XXXX	U1426A-2H-5A, 8.0cm		2
346	U1426	A	2	H	5	A	8.5	8.585	9.285		9.26507	27.6	24.8	20.8	26.2145	0.74578	6.05882	-	XXXX	U1426A-2H-5A, 8.5cm		2
346	U1426	A	2	H	5	A	9	8.59	9.29		9.27007	27.9	25	21	26.3767	0.813677	6.06058	-	XXXX	U1426A-2H-5A, 9.0cm		2
346	U1426	A	2	H	5	A	9.5	8.595	9.295		9.27507	28	25.1	20.9	26.4399	0.745731	6.26878	-	XXXX	U1426A-2H-5A, 9.5cm		2
346	U1426	A	2	H	5	A	10	8.6	9.3		9.28007	27.8	25	20.8	26.3509	0.675812	6.25579	-	XXXX	U1426A-2H-5A, 10.0cm		2
346	U1426	A	2	H	5	A	10.5	8.605	9.305		9.28507	27.8	25	20.8	26.3509	0.675812	6.25579	-	XXXX	U1426A-2H-5A, 10.5cm		2
346	U1426	A	2	H	5	A	11	8.61	9.31		9.29007	27.7	24.9	20.7	26.278	0.6776	6.26807	-	XXXX	U1426A-2H-5A, 11.0cm		2
346	U1426	A	2	H	5	A	11.5	8.615	9.315		9.29507	27.3	24.5	20.3	25.9846	0.684886	6.318	-	XXXX	U1426A-2H-5A, 11.5cm		2
346	U1426	A	2	H	5	A	12	8.62	9.32		9.30007	27.3	24.5	20.4	25.9894	0.718243	6.20619	-	XXXX	U1426A-2H-5A, 12.0cm		2
346	U1426	A	2	H	5	A	12.5	8.625	9.325		9.30507	27.1	24.4	20.4	25.904	0.680775	6.08113	-	XXXX	U1426A-2H-5A, 12.5cm		2
346	U1426	A	2	H	5	A	13	8.63	9.33		9.31007	27.3	24.6	20.5	26.0466	0.643785	6.1684	-	XXXX	U1426A-2H-5A, 13.0cm		2
346	U1426	A	2	H	5	A	13.5	8.635	9.335		9.31507	27.5	24.8	20.7	26.1933	0.64036	6.14414	-	XXXX	U1426A-2H-5A, 13.5cm		2
346	U1426	A	2	H	5	A	14	8.64	9.34		9.32007	28.1	25.4	21.4	26.6344	0.663292	5.96419	-	XXXX	U1426A-2H-5A, 14.0cm		2
346	U1426	A	2	H	5	A	14.5	8.645	9.345		9.32507	28.3	25.6	21.7	26.7833	0.692761	5.83346	-	XXXX	U1426A-2H-5A, 14.5cm		2
346	U1426	A	2	H	5	A	15	8.65	9.35		9.33007	28.4	25.7	21.8	26.8551	0.691046	5.82257	-	XXXX	U1426A-2H-5A, 15.0cm		2
346	U1426	A	2	H	5	A	15.5	8.655	9.355		9.33507	28.5	25.7	21.8	26.8711	0.761661	5.84743	-	XXXX	U1426A-2H-5A, 15.5cm		2
346	U1426	A	2	H	5	A	16	8.66	9.36		9.34007	28.3	25.5	21.4	26.7179	0.699822	6.08659	-	XXXX	U1426A-2H-5A, 16.0cm		2
346	U1426	A	2	H	5	A	16.5	8.665	9.365		9.34507	29	26.2	22.2	27.2231	0.720063	5.90036	-	XXXX	U1426A-2H-5A, 16.5cm		2
346	U1426	A	2	H	5	A	17	8.67	9.37		9.35007	29	26.2	22.1	27.2184	0.687675	6.00722	-	XXXX	U1426A-2H-5A, 17.0cm		2
346	U1426	A	2	H	5	A	17.5	8.675	9.375		9.35507	28.7	25.9	21.9	27.0095	0.725368	5.93317	-	XXXX	U1426A-2H-5A, 17.5cm		2
346	U1426	A	2	H	5	A	18	8.68	9.38		9.36007	28.6	25.9	21.7	26.9842	0.589783	6.12395	-	XXXX	U1426A-2H-5A, 18.0cm		2
346	U1426	A	2	H	5	A	18.5	8.685	9.385		9.36507	28.6	25.9	22	26.9983	0.687649	5.80101	-	XXXX	U1426A-2H-5A, 18.5cm		2
346	U1426	A	2	H	5	A	19	8.69	9.39		9.37007	28.8	26	22.1	27.0856	0.756112	5.81501	-	XXXX	U1426A-2H-5A, 19.0cm		2
346	U1426	A	2	H	5	A	19.5	8.695	9.395		9.37507	28.6	25.9	21.9	26.9936	0.655003	5.90843	-	XXXX	U1426A-2H-5A, 19.5cm		2
346	U1426	A	2	H	5	A	20	8.7	9.4		9.38007	28.5	25.7	21.7	26.8664	0.728964	5.95538	-	XXXX	U1426A-2H-5A, 20.0cm		2
346	U1426	A	2	H	5	A	20.5	8.705	9.405		9.38507	28.5	25.7	21.8	26.8711	0.761661	5.84743	-	XXXX	U1426A-2H-5A, 20.5cm		2
346	U1426	A	2	H	5	A	21	8.71	9.41		9.39007	27.9	25.1	21.3	26.4427	0.806178	5.80474	-	XXXX	U1426A-2H-5A, 21.0cm		2
346	U1426	A	2	H	5	A	21.5	8.715	9.415		9.39507	28.4	25.6	21.6	26.7946	0.730781	5.96659	-	XXXX	U1426A-2H-5A, 21.5cm		2
346	U1426	A	2	H	5	A	22	8.72	9.42		9.40007	28.6	25.8	21.8	26.938	0.72716	5.94424	-	XXXX	U1426A-2H-5A, 22.0cm		2
346	U1426	A	2	H	5	A	22.5	8.725	9.425		9.40507	28.1	25.4	21.5	26.6391	0.696229	5.85542	-	XXXX	U1426A-2H-5A, 22.5cm		2
346	U1426	A	2	H	5	A	23	8.73	9.43		9.41007	27.9	25.3	21.5	26.5555	0.659724	5.73263	-	XXXX	U1426A-2H-5A, 23.0cm		2
346	U1426	A	2	H	5	A	23.5	8.735	9.435		9.41507	28.2	25.5	21.7	26.716	0.727392	5.73614	-	XXXX	U1426A-2H-5A, 23.5cm		2
346	U1426	A	2	H	5	A	24	8.74	9.44		9.42007	28.1	25.4	21.5	26.6391	0.696229	5.85542	-	XXXX	U1426A-2H-5A, 24.0cm		2
346	U1426	A	2	H	5	A	24.5	8.745	9.445		9.42507	28	25.3	21.5	26.5716	0.731002	5.75771	-	XXXX	U1426A-2H-5A, 24.5cm		2
346	U1426	A	2	H	5	A	25	8.75	9.45		9.43007	28.2	25.6	21.8	26.772	0.654811	5.70055	-	XXXX	U1426A-2H-5A, 25.0cm		2
346	U1426	A	2	H	5	A	25.5	8.755	9.455		9.43507	28.8	26	22.2	27.0903	0.788661	5.70808	-	XXXX	U1426A-2H-5A, 25.5cm		2
346	U1426	A	2	H	5	A	26	8.76	9.46		9.44007	28.9	26.1	22.3	27.1614	0.786779	5.69767	-	XXXX	U1426A-2H-5A, 26.0cm		2
346	U1426	A	2	H	5	A	26.5	8.765	9.465		9.44507	28.5	25.7	21.8	26.8711	0.761661	5.84743	-	XXXX	U1426A-2H-5A, 26.5cm		2
346	U1426	A	2	H	5	A	27	8.77	9.47		9.45007	28.6	25.8	21.9	26.9427	0.759799	5.83656	-	XXXX	U1426A-2H-5A, 27.0cm		2
346	U1426	A	2	H	5	A	27.5	8.775	9.475		9.45507	29.1	26.3	22.3	27.294	0.718319	5.88956	-	XXXX	U1426A-2H-5A, 27.5cm		2
346	U1426	A	2	H	5	A	28	8.78	9.48		9.46007	29.3	26.5	22.4	27.4307	0.682643	5.97422	-	XXXX	U1426A-2H-5A, 28.0cm		2
346	U1426	A	2	H	5	A	28.5	8.785	9.485		9.46507	29	26.2	22.2	27.2231	0.720063	5.90036	-	XXXX	U1426A-2H-5A, 28.5cm		2
346	U1426	A	2	H	5	A	29	8.79	9.49		9.47007	28.8	25.9	21.9	27.0255	0.795648	5.95792	-	XXXX	U1426A-2H-5A, 29.0cm		2
346	U1426	A	2	H	5	A	29.5	8.795	9.495		9.47507	28.2	25.4	21.5	26.6552	0.767324	5.88045	-	XXXX	U1426A-2H-5A, 29.5cm		2
346	U1426	A	2	H	5	A	30	8.8	9.5		9.48007	28.2	25.4	21.4	26.6505	0.734453	5.98921	-	XXXX	U1426A-2H-5A, 30.0cm		2
346	U1426	A	2	H	5	A	30.5	8.805	9.505		9.48507	27.6	24.9	21.1	26.2808	0.738373	5.80165	-	XXXX	U1426A-2H-5A, 30.5cm		2
346	U1426	A	2	H	5	A	31	8.81	9.51		9.49007	27.8	25	21.1	26.3652	0.775058	5.92545	-	XXXX	U1426A-2H-5A, 31.0cm		2
346	U1426	A	2	H	5	A	31.5	8.815	9.515		9.49507	27.7	24.8	20.8	26.2308	0.817838	6.0842	-	XXXX	U1426A-2H-5A, 31.5cm		2
346	U1426	A	2	H	5	A	32	8.82	9.52		9.50007	28	25	21	26.393	0.885314	6.08584	-	XXXX	U1426A-2H-5A, 32.0cm		2
346	U1426	A	2	H	5	A	32.5	8.825	9.525		9.50507	28.5	25.4	21.3	26.6941	0.914763	6.1733	-	XXXX	U1426A-2H-5A, 32.5cm		2
346	U1426	A	2	H	5	A	33	8.83	9.53		9.51007	28.2	25.4	21.6	26.66	0.80022	5.77192	-	XXXX	U1426A-2H-5A, 33.0cm		2
346	U1426	A	2	H	5	A	33.5	8.835	9.535		9.51507	28.5	25.6	21.8	26.8201	0.866939	5.7753	-	XXXX	U1426A-2H-5A, 33.5cm		2
346	U1426	A	2	H	5	A	34	8.84	9.54		9.52007	28.8	25.9	22.1	27.0348	0.860708	5.74331	-	XXXX	U1426A-2H-5A, 34.0cm		2
346	U1426	A	2	H	5	A	34.5	8.845	9.545		9.52507	29.1	26.2	22.1	27.2343	0.757554	6.0318	-	XXXX	U1426A-2H-5A, 34.5cm		2
346	U1426	A	2	H	5	A	35	8.85	9.55		9.53007	29.2	26.2	22.1	27.2501	0.82735	6.05639	-	XXXX	U1426A-2H-5A, 35.0cm		2
346	U1426	A	2	H	5	A	35.5	8.855	9.555		9.53507	28.8	25.8	21.7	26.9653	0.835463	6.10176	-	XXXX	U1426A-2H-5A, 35.5cm		2
346	U1426	A	2	H	5	A	36	8.86	9.56		9.54007	28.1	25.2	21.1	26.5172	0.776676	6.14681	-	XXXX	U1426A-2H-5A, 36.0cm		2
346	U1426	A	2	H	5	A	36.5	8.865	9.565		9.54507	28.5	25.6	21.6	26.8106	0.801535	5.9915	-	XXXX	U1426A-2H-5A, 36.5cm		2
346	U1426	A	2	H	5	A	37	8.87	9.57		9.55007	28.7	25.7	21.8	26.9031	0.902637	5.89716	-	XXXX	U1426A-2H-5A, 37.0cm		2
346	U1426	A	2	H	5	A	37.5	8.875	9.575		9.55507	29	26	21.9	27.108	0.831379	6.07894	-	XXXX	U1426A-2H-5A, 37.5cm		2
346	U1426	A	2	H	5	A	38	8.88	9.58		9.56007	28.4	25.6	21.6	26.7946	0.730781	5.96659	-	XXXX	U1426A-2H-5A, 38.0cm		2
346	U1426	A	2	H	5	A	38.5	8.885	9.585		9.56507	28.3	25.4	21.4	26.6666	0.805526	6.01424	-	XXXX	U1426A-2H-5A, 38.5cm		2
346	U1426	A	2	H	5	A	39	8.89	9.59		9.57007	27.8	25	21.1	26.3652	0.775058	5.92545	-	XXXX	U1426A-2H-5A, 39.0cm		2
346	U1426	A	2	H	5	A	39.5	8.895	9.595		9.57507	27.5	24.7	21	26.1557	0.847657	5.73924	-	XXXX	U1426A-2H-5A, 39.5cm		2
346	U1426	A	2	H	5	A	40	8.9	9.6		9.58007	27.1	24.4	20.7	25.9186	0.781478	5.74707	-	XXXX	U1426A-2H-5A, 40.0cm		2
346	U1426	A	2	H	5	A	40.5	8.905	9.605		9.58507	27.3	24.6	20.9	26.0659	0.777509	5.72482	-	XXXX	U1426A-2H-5A, 40.5cm		2
346	U1426	A	2	H	5	A	41	8.91	9.61		9.59007	27.2	24.6	20.9	26.0495	0.705138	5.69933	-	XXXX	U1426A-2H-5A, 41.0cm		2
346	U1426	A	2	H	5	A	41.5	8.915	9.615		9.59507	28	25.3	21.6	26.5764	0.764047	5.64914	-	XXXX	U1426A-2H-5A, 41.5cm		2
346	U1426	A	2	H	5	A	42	8.92	9.62		9.60007	28.5	25.7	21.7	26.8664	0.728964	5.95538	-	XXXX	U1426A-2H-5A, 42.0cm		2
346	U1426	A	2	H	5	A	42.5	8.925	9.625		9.60507	28.6	25.7	21.7	26.8824	0.799559	5.98024	-	XXXX	U1426A-2H-5A, 42.5cm		2
346	U1426	A	2	H	5	A	43	8.93	9.63		9.61007	28.5	25.6	21.5	26.8059	0.768869	6.09995	-	XXXX	U1426A-2H-5A, 43.0cm		2
346	U1426	A	2	H	5	A	43.5	8.935	9.635		9.61507	28.3	25.5	21.3	26.7132	0.667059	6.19555	-	XXXX	U1426A-2H-5A, 43.5cm		2
346	U1426	A	2	H	5	A	44	8.94	9.64		9.62007	28.5	25.4	21.1	26.6847	0.849538	6.39198	-	XXXX	U1426A-2H-5A, 44.0cm		2
346	U1426	A	2	H	5	A	44.5	8.945	9.645		9.62507	28.6	25.6	21	26.7985	0.676972	6.67061	-	XXXX	U1426A-2H-5A, 44.5cm		2
346	U1426	A	2	H	5	A	45	8.95	9.65		9.63007	28	24.9	20.2	26.3032	0.72924	6.90087	-	XXXX	U1426A-2H-5A, 45.0cm		2
346	U1426	A	2	H	5	A	45.5	8.955	9.655		9.63507	28.7	25.7	21	26.8656	0.642784	6.76722	-	XXXX	U1426A-2H-5A, 45.5cm		2
346	U1426	A	2	H	5	A	46	8.96	9.66		9.64007	27.7	24.8	20.4	26.2117	0.68546	6.5284	-	XXXX	U1426A-2H-5A, 46.0cm		2
346	U1426	A	2	H	5	A	46.5	8.965	9.665		9.64507	27.8	24.9	20.8	26.2991	0.782676	6.18274	-	XXXX	U1426A-2H-5A, 46.5cm		2
346	U1426	A	2	H	5	A	47	8.97	9.67		9.65007	27.1	24.4	20.4	25.904	0.680775	6.08113	-	XXXX	U1426A-2H-5A, 47.0cm		2
346	U1426	A	2	H	5	A	47.5	8.975	9.675		9.65507	27.4	24.7	20.8	26.1297	0.708754	5.93453	-	XXXX	U1426A-2H-5A, 47.5cm		2
346	U1426	A	2	H	5	A	48	8.98	9.68		9.66007	28	25.2	21.1	26.501	0.705212	6.12167	-	XXXX	U1426A-2H-5A, 48.0cm		2
346	U1426	A	2	H	5	A	48.5	8.985	9.685		9.66507	28.2	25.4	21.2	26.641	0.668785	6.20745	-	XXXX	U1426A-2H-5A, 48.5cm		2
346	U1426	A	2	H	5	A	49	8.99	9.69		9.67007	28.2	25.4	21.1	26.6363	0.635988	6.31692	-	XXXX	U1426A-2H-5A, 49.0cm		2
346	U1426	A	2	H	5	A	49.5	8.995	9.695		9.67507	27.6	24.8	20.5	26.2001	0.646253	6.39161	-	XXXX	U1426A-2H-5A, 49.5cm		2
346	U1426	A	2	H	5	A	50	9	9.7		9.68007	28.3	25.4	21.2	26.6572	0.73999	6.23247	-	XXXX	U1426A-2H-5A, 50.0cm		2
346	U1426	A	2	H	5	A	50.5	9.005	9.705		9.68507	27.5	24.8	20.9	26.2029	0.706927	5.92301	-	XXXX	U1426A-2H-5A, 50.5cm		2
346	U1426	A	2	H	5	A	51	9.01	9.71		9.69007	28	25.3	21.3	26.5621	0.664985	5.97555	-	XXXX	U1426A-2H-5A, 51.0cm		2
346	U1426	A	2	H	5	A	51.5	9.015	9.715		9.69507	28	25.3	21.4	26.5668	0.697981	5.86651	-	XXXX	U1426A-2H-5A, 51.5cm		2
346	U1426	A	2	H	5	A	52	9.02	9.72		9.70007	27.8	25.1	21.2	26.4218	0.701521	5.8889	-	XXXX	U1426A-2H-5A, 52.0cm		2
346	U1426	A	2	H	5	A	52.5	9.025	9.725		9.70507	27.8	25.1	21.1	26.417	0.668406	5.99849	-	XXXX	U1426A-2H-5A, 52.5cm		2
346	U1426	A	2	H	5	A	53	9.03	9.73		9.71007	27.6	24.8	20.7	26.2097	0.712578	6.1695	-	XXXX	U1426A-2H-5A, 53.0cm		2
346	U1426	A	2	H	5	A	53.5	9.035	9.735		9.71507	28.2	25.4	21.3	26.6458	0.701606	6.09821	-	XXXX	U1426A-2H-5A, 53.5cm		2
346	U1426	A	2	H	5	A	54	9.04	9.74		9.72007	29	26.1	22.2	27.1726	0.824194	5.82898	-	XXXX	U1426A-2H-5A, 54.0cm		2
346	U1426	A	2	H	5	A	54.5	9.045	9.745		9.72507	29	26.1	22.1	27.1679	0.791789	5.93587	-	XXXX	U1426A-2H-5A, 54.5cm		2
346	U1426	A	2	H	5	A	55	9.05	9.75		9.73007	28.3	25.5	21.4	26.7179	0.699822	6.08659	-	XXXX	U1426A-2H-5A, 55.0cm		2
346	U1426	A	2	H	5	A	55.5	9.055	9.755		9.73507	28.4	25.4	21.3	26.678	0.843798	6.14827	-	XXXX	U1426A-2H-5A, 55.5cm		2
346	U1426	A	2	H	5	A	56	9.06	9.76		9.74007	28.7	25.7	21.4	26.8843	0.772511	6.33032	-	XXXX	U1426A-2H-5A, 56.0cm		2
346	U1426	A	2	H	5	A	56.5	9.065	9.765		9.74507	28.4	25.3	20.7	26.5984	0.753888	6.73507	-	XXXX	U1426A-2H-5A, 56.5cm		2
346	U1426	A	2	H	5	A	57	9.07	9.77		9.75007	29.8	26.5	21.7	27.4771	0.806195	6.84505	-	XXXX	U1426A-2H-5A, 57.0cm		2
346	U1426	A	2	H	5	A	57.5	9.075	9.775		9.75507	30.5	27.2	22.4	27.9664	0.79225	6.75601	-	XXXX	U1426A-2H-5A, 57.5cm		2
346	U1426	A	2	H	5	A	58	9.08	9.78		9.76007	30	27	22.4	27.7897	0.652954	6.49617	-	XXXX	U1426A-2H-5A, 58.0cm		2
346	U1426	A	2	H	5	A	58.5	9.085	9.785		9.76507	29.8	26.7	22.3	27.6046	0.79082	6.34352	-	XXXX	U1426A-2H-5A, 58.5cm		2
346	U1426	A	2	H	5	A	59	9.09	9.79		9.77007	30.3	27.5	23.3	28.1242	0.634917	5.97219	-	XXXX	U1426A-2H-5A, 59.0cm		2
346	U1426	A	2	H	5	A	59.5	9.095	9.795		9.77507	31	28.2	24	28.6045	0.624632	5.89997	-	XXXX	U1426A-2H-5A, 59.5cm		2
346	U1426	A	2	H	5	A	60	9.1	9.8		9.78007	30.9	28.2	23.8	28.5804	0.494888	6.08137	-	XXXX	U1426A-2H-5A, 60.0cm		2
346	U1426	A	2	H	5	A	60.5	9.105	9.805		9.78507	29.2	26.5	22.2	27.4057	0.548645	6.16264	-	XXXX	U1426A-2H-5A, 60.5cm		2
346	U1426	A	2	H	5	A	61	9.11	9.81		9.79007	29.1	26.4	22.1	27.3351	0.550047	6.17404	-	XXXX	U1426A-2H-5A, 61.0cm		2
346	U1426	A	2	H	5	A	61.5	9.115	9.815		9.79507	31	28.1	23.7	28.5425	0.630727	6.13913	-	XXXX	U1426A-2H-5A, 61.5cm		2
346	U1426	A	2	H	5	A	62	9.12	9.82		9.80007	31.9	28.9	24.4	29.0949	0.654513	6.17992	-	XXXX	U1426A-2H-5A, 62.0cm		2
346	U1426	A	2	H	5	A	62.5	9.125	9.825		9.80507	30.6	27.5	22.9	28.1522	0.713009	6.46124	-	XXXX	U1426A-2H-5A, 62.5cm		2
346	U1426	A	2	H	5	A	63	9.13	9.83		9.81007	30.2	27.2	22.6	27.929	0.649707	6.47243	-	XXXX	U1426A-2H-5A, 63.0cm		2
346	U1426	A	2	H	5	A	63.5	9.135	9.835		9.81507	30.8	27.7	23.2	28.2945	0.740877	6.33392	-	XXXX	U1426A-2H-5A, 63.5cm		2
346	U1426	A	2	H	5	A	64	9.14	9.84		9.82007	31.7	28.7	24.4	28.9691	0.719283	5.99798	-	XXXX	U1426A-2H-5A, 64.0cm		2
346	U1426	A	2	H	5	A	64.5	9.145	9.845		9.82507	32.6	29.6	25.2	29.5664	0.674717	6.0082	-	XXXX	U1426A-2H-5A, 64.5cm		2
346	U1426	A	2	H	5	A	65	9.15	9.85		9.83007	32.8	30	25.7	29.8057	0.569754	5.82497	-	XXXX	U1426A-2H-5A, 65.0cm		2
346	U1426	A	2	H	5	A	65.5	9.155	9.855		9.83507	33.1	30.2	25.9	29.9517	0.631765	5.82893	-	XXXX	U1426A-2H-5A, 65.5cm		2
346	U1426	A	2	H	5	A	66	9.16	9.86		9.84007	33.4	30.5	26	30.1393	0.567587	5.99649	-	XXXX	U1426A-2H-5A, 66.0cm		2
346	U1426	A	2	H	5	A	66.5	9.165	9.865		9.84507	33.6	30.7	26	30.2609	0.505222	6.17263	-	XXXX	U1426A-2H-5A, 66.5cm		2
346	U1426	A	2	H	5	A	67	9.17	9.87		9.85007	34	30.9	26.3	30.4237	0.660193	6.10031	-	XXXX	U1426A-2H-5A, 67.0cm		2
346	U1426	A	2	H	5	A	67.5	9.175	9.875		9.85507	34.6	31.6	27	30.8597	0.587746	6.01159	-	XXXX	U1426A-2H-5A, 67.5cm		2
346	U1426	A	2	H	5	A	68	9.18	9.88		9.86007	35.3	32.3	27.7	31.3046	0.579289	5.94747	-	XXXX	U1426A-2H-5A, 68.0cm		2
346	U1426	A	2	H	5	A	68.5	9.185	9.885		9.86507	35.1	32.1	27.6	31.1823	0.610974	5.87075	-	XXXX	U1426A-2H-5A, 68.5cm		2
346	U1426	A	2	H	5	A	69	9.19	9.89		9.87007	35.1	32.2	27.6	31.2274	0.518268	5.93468	-	XXXX	U1426A-2H-5A, 69.0cm		2
346	U1426	A	2	H	5	A	69.5	9.195	9.895		9.87507	35.2	32.3	28	31.3032	0.60503	5.64281	-	XXXX	U1426A-2H-5A, 69.5cm		2
346	U1426	A	2	H	5	A	70	9.2	9.9		9.88007	35.8	32.9	28.6	31.6803	0.597939	5.59302	-	XXXX	U1426A-2H-5A, 70.0cm		2
346	U1426	A	2	H	5	A	70.5	9.205	9.905		9.88507	36.7	33.7	29.3	32.1868	0.620611	5.64169	-	XXXX	U1426A-2H-5A, 70.5cm		2
346	U1426	A	2	H	5	A	71	9.21	9.91		9.89007	37.3	34.4	29.9	32.5985	0.52429	5.65556	-	XXXX	U1426A-2H-5A, 71.0cm		2
346	U1426	A	2	H	5	A	71.5	9.215	9.915		9.89507	37.6	34.7	30.2	32.7811	0.521317	5.6318	-	XXXX	U1426A-2H-5A, 71.5cm		2
346	U1426	A	2	H	5	A	72	9.22	9.92		9.90007	37.6	34.7	30.3	32.7852	0.549624	5.54164	-	XXXX	U1426A-2H-5A, 72.0cm		2
346	U1426	A	2	H	5	A	72.5	9.225	9.925		9.90507	38.4	35.5	31	33.2638	0.513602	5.56994	-	XXXX	U1426A-2H-5A, 72.5cm		2
346	U1426	A	2	H	5	A	73	9.23	9.93		9.91007	38.2	35.2	30.7	33.0968	0.575495	5.61362	-	XXXX	U1426A-2H-5A, 73.0cm		2
346	U1426	A	2	H	5	A	73.5	9.235	9.935		9.91507	38	35.1	30.5	33.0192	0.489281	5.69025	-	XXXX	U1426A-2H-5A, 73.5cm		2
346	U1426	A	2	H	5	A	74	9.24	9.94		9.92007	38.6	35.6	30.9	33.3289	0.5155	5.76082	-	XXXX	U1426A-2H-5A, 74.0cm		2
346	U1426	A	2	H	5	A	74.5	9.245	9.945		9.92507	38.4	35.5	31	33.2638	0.513602	5.56994	-	XXXX	U1426A-2H-5A, 74.5cm		2
346	U1426	A	2	H	5	A	75	9.25	9.95		9.93007	38.5	35.6	31.1	33.3237	0.512659	5.56236	-	XXXX	U1426A-2H-5A, 75.0cm		2
346	U1426	A	2	H	5	A	75.5	9.255	9.955		9.93507	38.7	35.8	31.2	33.4392	0.48291	5.63584	-	XXXX	U1426A-2H-5A, 75.5cm		2
346	U1426	A	2	H	5	A	76	9.26	9.96		9.94007	38.8	36	31.3	33.5413	0.39494	5.68852	-	XXXX	U1426A-2H-5A, 76.0cm		2
346	U1426	A	2	H	5	A	76.5	9.265	9.965		9.94507	38.5	35.7	31.2	33.3703	0.453116	5.53425	-	XXXX	U1426A-2H-5A, 76.5cm		2
346	U1426	A	2	H	5	A	77	9.27	9.97		9.95007	38.8	36	31.4	33.5453	0.42277	5.60013	-	XXXX	U1426A-2H-5A, 77.0cm		2
346	U1426	A	2	H	5	A	77.5	9.275	9.975		9.95507	38.6	35.8	31.2	33.4261	0.424361	5.61532	-	XXXX	U1426A-2H-5A, 77.5cm		2
346	U1426	A	2	H	5	A	78	9.28	9.98		9.96007	38.1	35.4	30.9	33.1773	0.396715	5.53624	-	XXXX	U1426A-2H-5A, 78.0cm		2
346	U1426	A	2	H	5	A	78.5	9.285	9.985		9.96507	38.9	36.1	31.6	33.6087	0.449786	5.50449	-	XXXX	U1426A-2H-5A, 78.5cm		2
346	U1426	A	2	H	5	A	79	9.29	9.99		9.97007	39.1	36.3	31.8	33.7274	0.448144	5.4898	-	XXXX	U1426A-2H-5A, 79.0cm		2
346	U1426	A	2	H	5	A	79.5	9.295	9.995		9.97507	39	36.3	31.8	33.7143	0.390056	5.46944	-	XXXX	U1426A-2H-5A, 79.5cm		2
346	U1426	A	2	H	5	A	80	9.3	10		9.98007	39	36.3	31.7	33.7104	0.362285	5.55724	-	XXXX	U1426A-2H-5A, 80.0cm		2
346	U1426	A	2	H	5	A	80.5	9.305	10.005		9.98507	39.1	36.5	31.9	33.8157	0.302928	5.52214	-	XXXX	U1426A-2H-5A, 80.5cm		2
346	U1426	A	2	H	5	A	81	9.31	10.01		9.99007	39	36.3	31.7	33.7104	0.362285	5.55724	-	XXXX	U1426A-2H-5A, 81.0cm		2
[truncated: 45,860 more rows]

## Sheet: RSC
Exp	Site	Hole	Core	Type	Sect	A/W	Offset (cm)	Depth CSF-A (m)	CCSF-D (m)	CCSF-A (m)	CCSF-D_Patched_rev20150519 (m)	L*	a*	b*	Tristimulus X	Tristimulus Y	Tristimulus Z	Timestamp (UTC)	Instrument	Instrument group	Proceedings label	Comments	Splice Interval	Patch
346	U1426	C	1	H	1	A	2	0.02	0.02		0.02	31	0.5	3.6	6.4	6.7	6.2	41522.9	USB4000-VIS-RF52054	SHMSL	U1426C-1H-1A, 2.0cm		1
346	U1426	C	1	H	1	A	4	0.04	0.04		0.04	32.9	0.9	2.7	7.2	7.5	7.3	41522.9	USB4000-VIS-RF52054	SHMSL	U1426C-1H-1A, 4.0cm		1
346	U1426	C	1	H	1	A	6	0.06	0.06		0.06	32.1	0.9	2.7	6.9	7.1	6.9	41522.9	USB4000-VIS-RF52054	SHMSL	U1426C-1H-1A, 6.0cm		1
346	U1426	C	1	H	1	A	8	0.08	0.08		0.08	30.8	1.1	3	6.3	6.6	6.3	41522.9	USB4000-VIS-RF52054	SHMSL	U1426C-1H-1A, 8.0cm		1
346	U1426	C	1	H	1	A	10	0.1	0.1		0.1	33.6	1.1	1.5	7.5	7.8	8	41522.9	USB4000-VIS-RF52054	SHMSL	U1426C-1H-1A, 10.0cm		1
346	U1426	C	1	H	1	A	12	0.12	0.12		0.12	34.5	1.4	0.4	8	8.2	8.7	41522.9	USB4000-VIS-RF52054	SHMSL	U1426C-1H-1A, 12.0cm		1
346	U1426	C	1	H	1	A	14	0.14	0.14		0.14	29.3	1	2.7	5.7	6	5.8	41522.9	USB4000-VIS-RF52054	SHMSL	U1426C-1H-1A, 14.0cm		1
346	U1426	C	1	H	1	A	16	0.16	0.16		0.16	33.4	1.5	-1.4	7.5	7.7	8.7	41522.9	USB4000-VIS-RF52054	SHMSL	U1426C-1H-1A, 16.0cm		1
346	U1426	C	1	H	1	A	18	0.18	0.18		0.18	32.9	1.2	0.6	7.2	7.5	7.9	41522.9	USB4000-VIS-RF52054	SHMSL	U1426C-1H-1A, 18.0cm		1
346	U1426	C	1	H	1	A	20	0.2	0.2		0.2	36.6	1.6	-1.3	9	9.3	10.5	41522.9	USB4000-VIS-RF52054	SHMSL	U1426C-1H-1A, 20.0cm		1
346	U1426	C	1	H	1	A	22	0.22	0.22		0.22	31.4	1.1	1.2	6.6	6.8	7	41522.9	USB4000-VIS-RF52054	SHMSL	U1426C-1H-1A, 22.0cm		1
346	U1426	C	1	H	1	A	24	0.24	0.24		0.24	30.2	1	2.3	6.1	6.3	6.2	41522.9	USB4000-VIS-RF52054	SHMSL	U1426C-1H-1A, 24.0cm		1
346	U1426	C	1	H	1	A	26	0.26	0.26		0.26	30.9	0.9	2.2	6.3	6.6	6.5	41522.9	USB4000-VIS-RF52054	SHMSL	U1426C-1H-1A, 26.0cm		1
346	U1426	C	1	H	1	A	28	0.28	0.28		0.28	31.4	0.9	1.9	6.5	6.8	6.8	41522.9	USB4000-VIS-RF52054	SHMSL	U1426C-1H-1A, 28.0cm		1
346	U1426	C	1	H	1	A	30	0.3	0.3		0.3	31.1	1	1.4	6.4	6.7	6.8	41522.9	USB4000-VIS-RF52054	SHMSL	U1426C-1H-1A, 30.0cm		1
346	U1426	C	1	H	1	A	32	0.32	0.32		0.32	29.5	0.8	2.2	5.8	6	6	41522.9	USB4000-VIS-RF52054	SHMSL	U1426C-1H-1A, 32.0cm		1
346	U1426	C	1	H	1	A	34	0.34	0.34		0.34	29.2	0.6	2.4	5.6	5.9	5.8	41522.9	USB4000-VIS-RF52054	SHMSL	U1426C-1H-1A, 34.0cm		1
346	U1426	C	1	H	1	A	36	0.36	0.36		0.36	32.7	1.1	0	7.1	7.4	7.9	41522.9	USB4000-VIS-RF52054	SHMSL	U1426C-1H-1A, 36.0cm		1
346	U1426	C	1	H	1	A	38	0.38	0.38		0.38	29.6	0.8	1.1	5.8	6.1	6.3	41522.9	USB4000-VIS-RF52054	SHMSL	U1426C-1H-1A, 38.0cm		1
346	U1426	C	1	H	1	A	40	0.4	0.4		0.4	30.4	0.9	0.5	6.2	6.4	6.7	41522.9	USB4000-VIS-RF52054	SHMSL	U1426C-1H-1A, 40.0cm		1
346	U1426	C	1	H	1	A	42	0.42	0.42		0.42	29.8	0.7	0.8	5.9	6.2	6.4	41522.9	USB4000-VIS-RF52054	SHMSL	U1426C-1H-1A, 42.0cm		1
346	U1426	C	1	H	1	A	44	0.44	0.44		0.44	29.3	0.6	1.6	5.7	6	6	41522.9	USB4000-VIS-RF52054	SHMSL	U1426C-1H-1A, 44.0cm		1
346	U1426	C	1	H	1	A	46	0.46	0.46		0.46	30	0.6	1.5	6	6.3	6.4	41522.9	USB4000-VIS-RF52054	SHMSL	U1426C-1H-1A, 46.0cm		1
346	U1426	C	1	H	1	A	48	0.48	0.48		0.48	29.5	0.5	2.3	5.8	6	5.9	41522.9	USB4000-VIS-RF52054	SHMSL	U1426C-1H-1A, 48.0cm		1
346	U1426	C	1	H	1	A	50	0.5	0.5		0.5	30.1	0.5	1.9	6	6.3	6.3	41522.9	USB4000-VIS-RF52054	SHMSL	U1426C-1H-1A, 50.0cm		1
346	U1426	C	1	H	1	A	52	0.52	0.52		0.52	29.8	0.5	2	5.9	6.2	6.1	41522.9	USB4000-VIS-RF52054	SHMSL	U1426C-1H-1A, 52.0cm		1
346	U1426	C	1	H	1	A	54	0.54	0.54		0.54	32.5	0.6	0.5	7	7.3	7.7	41522.9	USB4000-VIS-RF52054	SHMSL	U1426C-1H-1A, 54.0cm		1
346	U1426	C	1	H	1	A	56	0.56	0.56		0.56	29.4	0.4	2	5.7	6	6	41522.9	USB4000-VIS-RF52054	SHMSL	U1426C-1H-1A, 56.0cm		1
346	U1426	C	1	H	1	A	58	0.58	0.58		0.58	29.9	0.6	1.7	5.9	6.2	6.2	41522.9	USB4000-VIS-RF52054	SHMSL	U1426C-1H-1A, 58.0cm		1
346	U1426	C	1	H	1	A	60	0.6	0.6		0.6	28	0.4	2.3	5.2	5.5	5.3	41522.9	USB4000-VIS-RF52054	SHMSL	U1426C-1H-1A, 60.0cm		1
346	U1426	C	1	H	1	A	62	0.62	0.62		0.62	36.6	1.4	-2.1	9	9.3	10.7	41522.9	USB4000-VIS-RF52054	SHMSL	U1426C-1H-1A, 62.0cm		1
346	U1426	C	1	H	1	A	64	0.64	0.64		0.64	31.2	0.7	0.1	6.5	6.7	7.2	41522.9	USB4000-VIS-RF52054	SHMSL	U1426C-1H-1A, 64.0cm		1
346	U1426	C	1	H	1	A	66	0.66	0.66		0.66	31.8	0.8	0.2	6.7	7	7.4	41522.9	USB4000-VIS-RF52054	SHMSL	U1426C-1H-1A, 66.0cm		1
346	U1426	C	1	H	1	A	68	0.68	0.68		0.68	31.4	0.8	0.2	6.6	6.8	7.3	41522.9	USB4000-VIS-RF52054	SHMSL	U1426C-1H-1A, 68.0cm		1
346	U1426	C	1	H	1	A	70	0.7	0.7		0.7	29.5	0.5	0.9	5.8	6	6.3	41522.9	USB4000-VIS-RF52054	SHMSL	U1426C-1H-1A, 70.0cm		1
346	U1426	C	1	H	1	A	72	0.72	0.72		0.72	29.7	0.5	0	5.8	6.1	6.5	41522.9	USB4000-VIS-RF52054	SHMSL	U1426C-1H-1A, 72.0cm		1
346	U1426	C	1	H	1	A	74	0.74	0.74		0.74	20.9	0.4	-1.9	3.1	3.2	3.8	41522.9	USB4000-VIS-RF52054	SHMSL	U1426C-1H-1A, 74.0cm		1
346	U1426	C	1	H	1	A	76	0.76	0.76		0.76	26.6	0.3	1.8	4.7	5	5	41522.9	USB4000-VIS-RF52054	SHMSL	U1426C-1H-1A, 76.0cm		1
346	U1426	C	1	H	1	A	78	0.78	0.78		0.78	29.5	0.6	1	5.8	6	6.2	41522.9	USB4000-VIS-RF52054	SHMSL	U1426C-1H-1A, 78.0cm		1
346	U1426	C	1	H	1	A	80	0.8	0.8		0.8	29.2	0.5	1.5	5.7	5.9	6	41522.9	USB4000-VIS-RF52054	SHMSL	U1426C-1H-1A, 80.0cm		1
346	U1426	C	1	H	1	A	82	0.82	0.82		0.82	30	0.5	1.6	6	6.2	6.3	41522.9	USB4000-VIS-RF52054	SHMSL	U1426C-1H-1A, 82.0cm		1
346	U1426	C	1	H	1	A	84	0.84	0.84		0.84	29.6	0.6	1.3	5.8	6.1	6.2	41522.9	USB4000-VIS-RF52054	SHMSL	U1426C-1H-1A, 84.0cm		1
346	U1426	C	1	H	1	A	86	0.86	0.86		0.86	31.7	0.8	0.4	6.7	6.9	7.3	41522.9	USB4000-VIS-RF52054	SHMSL	U1426C-1H-1A, 86.0cm		1
346	U1426	C	1	H	1	A	88	0.88	0.88		0.88	30.7	0.5	1.3	6.2	6.5	6.7	41522.9	USB4000-VIS-RF52054	SHMSL	U1426C-1H-1A, 88.0cm		1
346	U1426	C	1	H	1	A	90	0.9	0.9		0.9	29.5	0.4	2	5.8	6	6	41522.9	USB4000-VIS-RF52054	SHMSL	U1426C-1H-1A, 90.0cm		1
346	U1426	C	1	H	1	A	92	0.92	0.92		0.92	29.7	0.5	1.5	5.8	6.1	6.2	41522.9	USB4000-VIS-RF52054	SHMSL	U1426C-1H-1A, 92.0cm		1
346	U1426	C	1	H	1	A	94	0.94	0.94		0.94	32.1	0.6	1	6.8	7.1	7.4	41522.9	USB4000-VIS-RF52054	SHMSL	U1426C-1H-1A, 94.0cm		1
346	U1426	C	1	H	1	A	96	0.96	0.96		0.96	29.7	0.5	1.5	5.8	6.1	6.2	41522.9	USB4000-VIS-RF52054	SHMSL	U1426C-1H-1A, 96.0cm		1
346	U1426	C	1	H	1	A	98	0.98	0.98		0.98	30.3	0.6	0.9	6.1	6.3	6.6	41522.9	USB4000-VIS-RF52054	SHMSL	U1426C-1H-1A, 98.0cm		1
346	U1426	C	1	H	1	A	100	1	1		1	36.8	1.4	-2.3	9.1	9.4	10.9	41522.9	USB4000-VIS-RF52054	SHMSL	U1426C-1H-1A, 100.0cm		1
346	U1426	C	1	H	1	A	102	1.02	1.02		1.02	31.2	0.7	-0.1	6.5	6.7	7.3	41522.9	USB4000-VIS-RF52054	SHMSL	U1426C-1H-1A, 102.0cm		1
346	U1426	C	1	H	1	A	104	1.04	1.04		1.04	29.4	0.6	0.7	5.7	6	6.2	41522.9	USB4000-VIS-RF52054	SHMSL	U1426C-1H-1A, 104.0cm		1
346	U1426	C	1	H	1	A	106	1.06	1.06		1.06	28.5	0.5	1.1	5.4	5.7	5.8	41522.9	USB4000-VIS-RF52054	SHMSL	U1426C-1H-1A, 106.0cm		1
346	U1426	C	1	H	1	A	108	1.08	1.08		1.08	29.1	0.6	1.1	5.6	5.9	6	41522.9	USB4000-VIS-RF52054	SHMSL	U1426C-1H-1A, 108.0cm		1
346	U1426	C	1	H	1	A	110	1.1	1.1		1.1	32.6	1	-0.8	7.1	7.3	8.1	41522.9	USB4000-VIS-RF52054	SHMSL	U1426C-1H-1A, 110.0cm		1
346	U1426	C	1	H	1	A	112	1.12	1.12		1.12	36.5	1.3	-2	8.9	9.3	10.6	41522.9	USB4000-VIS-RF52054	SHMSL	U1426C-1H-1A, 112.0cm		1
346	U1426	C	1	H	1	A	114	1.14	1.14		1.14	37.2	1.3	-2.3	9.3	9.6	11.1	41522.9	USB4000-VIS-RF52054	SHMSL	U1426C-1H-1A, 114.0cm		1
346	U1426	C	1	H	1	A	116	1.16	1.16		1.16	29.5	0.7	0.1	5.8	6.1	6.5	41522.9	USB4000-VIS-RF52054	SHMSL	U1426C-1H-1A, 116.0cm		1
346	U1426	C	1	H	1	A	118	1.18	1.18		1.18	37.9	1.5	-3	9.7	10	11.8	41522.9	USB4000-VIS-RF52054	SHMSL	U1426C-1H-1A, 118.0cm		1
346	U1426	C	1	H	1	A	120	1.2	1.2		1.2	32.7	0.9	-0.4	7.1	7.4	8.1	41522.9	USB4000-VIS-RF52054	SHMSL	U1426C-1H-1A, 120.0cm		1
346	U1426	C	1	H	1	A	122	1.22	1.22		1.22	32.9	0.8	-0.2	7.2	7.5	8.1	41522.9	USB4000-VIS-RF52054	SHMSL	U1426C-1H-1A, 122.0cm		1
346	U1426	C	1	H	1	A	124	1.24	1.24		1.24	29.3	0.6	0.8	5.7	6	6.2	41522.9	USB4000-VIS-RF52054	SHMSL	U1426C-1H-1A, 124.0cm		1
346	U1426	C	1	H	1	A	126	1.26	1.26		1.26	29.6	0.7	0.4	5.8	6.1	6.4	41522.9	USB4000-VIS-RF52054	SHMSL	U1426C-1H-1A, 126.0cm		1
346	U1426	C	1	H	1	A	128	1.28	1.28		1.28	34.1	0.9	-0.8	7.7	8.1	8.9	41522.9	USB4000-VIS-RF52054	SHMSL	U1426C-1H-1A, 128.0cm		1
346	U1426	C	1	H	1	A	130	1.3	1.3		1.3	28.5	0.4	1.5	5.4	5.6	5.7	41522.9	USB4000-VIS-RF52054	SHMSL	U1426C-1H-1A, 130.0cm		1
346	U1426	C	1	H	1	A	132	1.32	1.32		1.32	28.3	0.3	1.7	5.3	5.6	5.6	41522.9	USB4000-VIS-RF52054	SHMSL	U1426C-1H-1A, 132.0cm		1
346	U1426	C	1	H	1	A	134	1.34	1.34		1.34	28.9	0.5	1.2	5.5	5.8	5.9	41522.9	USB4000-VIS-RF52054	SHMSL	U1426C-1H-1A, 134.0cm		1
346	U1426	C	1	H	1	A	136	1.36	1.36		1.36	28.2	0.3	1.9	5.3	5.5	5.5	41522.9	USB4000-VIS-RF52054	SHMSL	U1426C-1H-1A, 136.0cm		1
346	U1426	C	1	H	1	A	138	1.38	1.38		1.38	28.4	0.4	2	5.4	5.6	5.6	41522.9	USB4000-VIS-RF52054	SHMSL	U1426C-1H-1A, 138.0cm		1
346	U1426	C	1	H	1	A	140	1.4	1.4		1.4	33	0.8	0.2	7.2	7.6	8	41522.9	USB4000-VIS-RF52054	SHMSL	U1426C-1H-1A, 140.0cm		1
346	U1426	C	1	H	1	A	142	1.42	1.42		1.42	29	0.4	1.7	5.6	5.8	5.9	41522.9	USB4000-VIS-RF52054	SHMSL	U1426C-1H-1A, 142.0cm		1
346	U1426	C	1	H	1	A	144	1.44	1.44		1.44	29.2	0.4	1.1	5.6	5.9	6.1	41522.9	USB4000-VIS-RF52054	SHMSL	U1426C-1H-1A, 144.0cm		1
346	U1426	C	1	H	1	A	146	1.46	1.46		1.46	28.4	0.3	1.9	5.4	5.6	5.6	41522.9	USB4000-VIS-RF52054	SHMSL	U1426C-1H-1A, 146.0cm		1
346	U1426	C	1	H	1	A	148	1.48	1.48		1.48	28.1	0.7	-0.4	5.3	5.5	6	41522.9	USB4000-VIS-RF52054	SHMSL	U1426C-1H-1A, 148.0cm		1
346	U1426	C	1	H	2	A	2	1.52	1.52		1.52	31.8	1	-1.1	6.7	7	7.8	41522.9	USB4000-VIS-RF52054	SHMSL	U1426C-1H-2A, 2.0cm		1
346	U1426	C	1	H	2	A	4	1.54	1.54		1.54	30.3	0.9	-0.1	6.1	6.4	6.9	41522.9	USB4000-VIS-RF52054	SHMSL	U1426C-1H-2A, 4.0cm		1
346	U1426	C	1	H	2	A	6	1.56	1.56		1.56	32.2	1.1	-1.2	6.9	7.2	8.1	41522.9	USB4000-VIS-RF52054	SHMSL	U1426C-1H-2A, 6.0cm		1
346	U1426	C	1	H	2	A	8	1.58	1.58		1.58	35.9	1.3	-1.8	8.7	9	10.2	41522.9	USB4000-VIS-RF52054	SHMSL	U1426C-1H-2A, 8.0cm		1
346	U1426	C	1	H	2	A	10	1.6	1.6		1.6	33.2	1.1	-1.6	7.4	7.6	8.7	41522.9	USB4000-VIS-RF52054	SHMSL	U1426C-1H-2A, 10.0cm		1
346	U1426	C	1	H	2	A	12	1.62	1.62		1.62	32.2	1	-0.6	6.9	7.2	7.9	41522.9	USB4000-VIS-RF52054	SHMSL	U1426C-1H-2A, 12.0cm		1
346	U1426	C	1	H	2	A	14	1.64	1.64		1.64	30.7	0.9	0	6.3	6.5	7	41522.9	USB4000-VIS-RF52054	SHMSL	U1426C-1H-2A, 14.0cm		1
346	U1426	C	1	H	2	A	16	1.66	1.66		1.66	30.6	0.9	-0.2	6.3	6.5	7	41522.9	USB4000-VIS-RF52054	SHMSL	U1426C-1H-2A, 16.0cm		1
346	U1426	C	1	H	2	A	18	1.68	1.68		1.68	30.4	1	0	6.2	6.4	6.9	41522.9	USB4000-VIS-RF52054	SHMSL	U1426C-1H-2A, 18.0cm		1
346	U1426	C	1	H	2	A	20	1.7	1.7		1.7	31.6	1.1	-0.5	6.6	6.9	7.6	41522.9	USB4000-VIS-RF52054	SHMSL	U1426C-1H-2A, 20.0cm		1
346	U1426	C	1	H	2	A	22	1.72	1.72		1.72	31.7	1.2	-0.7	6.7	7	7.7	41522.9	USB4000-VIS-RF52054	SHMSL	U1426C-1H-2A, 22.0cm		1
346	U1426	C	1	H	2	A	24	1.74	1.74		1.74	32.1	1.4	-1.3	6.9	7.1	8	41522.9	USB4000-VIS-RF52054	SHMSL	U1426C-1H-2A, 24.0cm		1
346	U1426	C	1	H	2	A	26	1.76	1.76		1.76	31.9	1.1	-0.3	6.8	7	7.6	41522.9	USB4000-VIS-RF52054	SHMSL	U1426C-1H-2A, 26.0cm		1
346	U1426	C	1	H	2	A	28	1.78	1.78		1.78	27.2	0.8	1.2	4.9	5.1	5.3	41522.9	USB4000-VIS-RF52054	SHMSL	U1426C-1H-2A, 28.0cm		1
346	U1426	C	1	H	2	A	30	1.8	1.8		1.8	31.9	1.1	-0.2	6.8	7	7.6	41522.9	USB4000-VIS-RF52054	SHMSL	U1426C-1H-2A, 30.0cm		1
346	U1426	C	1	H	2	A	32	1.82	1.82		1.82	35.6	1.5	-2.4	8.5	8.8	10.3	41522.9	USB4000-VIS-RF52054	SHMSL	U1426C-1H-2A, 32.0cm		1
346	U1426	C	1	H	2	A	34	1.84	1.84		1.84	31.1	1	1.2	6.4	6.7	6.9	41522.9	USB4000-VIS-RF52054	SHMSL	U1426C-1H-2A, 34.0cm		1
346	U1426	C	1	H	2	A	36	1.86	1.86		1.86	30.2	0.8	2.3	6.1	6.3	6.2	41522.9	USB4000-VIS-RF52054	SHMSL	U1426C-1H-2A, 36.0cm		1
346	U1426	C	1	H	2	A	38	1.88	1.88		1.88	28.7	0.9	1.3	5.5	5.7	5.8	41522.9	USB4000-VIS-RF52054	SHMSL	U1426C-1H-2A, 38.0cm		1
346	U1426	C	1	H	2	A	40	1.9	1.9		1.9	29.3	1	0.7	5.7	6	6.2	41522.9	USB4000-VIS-RF52054	SHMSL	U1426C-1H-2A, 40.0cm		1
346	U1426	C	1	H	2	A	42	1.92	1.92		1.92	30.4	1.1	-0.3	6.2	6.4	7	41522.9	USB4000-VIS-RF52054	SHMSL	U1426C-1H-2A, 42.0cm		1
346	U1426	C	1	H	2	A	44	1.94	1.94		1.94	30.2	0.9	0	6.1	6.3	6.8	41522.9	USB4000-VIS-RF52054	SHMSL	U1426C-1H-2A, 44.0cm		1
346	U1426	C	1	H	2	A	46	1.96	1.96		1.96	26.6	0.9	0.7	4.8	5	5.2	41522.9	USB4000-VIS-RF52054	SHMSL	U1426C-1H-2A, 46.0cm		1
346	U1426	C	1	H	2	A	48	1.98	1.98		1.98	33.5	1.4	-2.9	7.5	7.8	9.2	41522.9	USB4000-VIS-RF52054	SHMSL	U1426C-1H-2A, 48.0cm		1
346	U1426	C	1	H	2	A	50	2	2		2	31.8	1.3	-1.4	6.8	7	7.9	41522.9	USB4000-VIS-RF52054	SHMSL	U1426C-1H-2A, 50.0cm		1
346	U1426	C	1	H	2	A	52	2.02	2.02		2.02	26.5	0.8	1.1	4.7	4.9	5.1	41522.9	USB4000-VIS-RF52054	SHMSL	U1426C-1H-2A, 52.0cm		1
346	U1426	C	1	H	2	A	54	2.04	2.04		2.04	25.1	0.5	1.7	4.3	4.5	4.4	41522.9	USB4000-VIS-RF52054	SHMSL	U1426C-1H-2A, 54.0cm		1
346	U1426	C	1	H	2	A	56	2.06	2.06		2.06	23.5	0.5	2.1	3.8	3.9	3.9	41522.9	USB4000-VIS-RF52054	SHMSL	U1426C-1H-2A, 56.0cm		1
346	U1426	C	1	H	2	A	58	2.08	2.08		2.08	32.7	1.1	-1.4	7.1	7.4	8.4	41522.9	USB4000-VIS-RF52054	SHMSL	U1426C-1H-2A, 58.0cm		1
346	U1426	C	1	H	2	A	60	2.1	2.1		2.1	23.2	0.4	2.9	3.7	3.9	3.6	41522.9	USB4000-VIS-RF52054	SHMSL	U1426C-1H-2A, 60.0cm		1
346	U1426	C	1	H	2	A	62	2.12	2.12		2.12	30.9	0.7	0.6	6.3	6.6	6.9	41522.9	USB4000-VIS-RF52054	SHMSL	U1426C-1H-2A, 62.0cm		1
346	U1426	C	1	H	2	A	64	2.14	2.14		2.14	26.7	0.7	0.5	4.8	5	5.3	41522.9	USB4000-VIS-RF52054	SHMSL	U1426C-1H-2A, 64.0cm		1
346	U1426	C	1	H	2	A	66	2.16	2.16		2.16	23.8	0.5	2.6	3.9	4	3.9	41522.9	USB4000-VIS-RF52054	SHMSL	U1426C-1H-2A, 66.0cm		1
346	U1426	C	1	H	2	A	68	2.18	2.18		2.18	21.5	0.5	4.1	3.2	3.4	3	41522.9	USB4000-VIS-RF52054	SHMSL	U1426C-1H-2A, 68.0cm		1
346	U1426	C	1	H	2	A	70	2.2	2.2		2.2	21.4	0.7	4.1	3.2	3.4	3	41522.9	USB4000-VIS-RF52054	SHMSL	U1426C-1H-2A, 70.0cm		1
346	U1426	C	1	H	2	A	72	2.22	2.22		2.22	26.8	1.2	1.2	4.9	5	5.2	41522.9	USB4000-VIS-RF52054	SHMSL	U1426C-1H-2A, 72.0cm		1
346	U1426	C	1	H	2	A	74	2.24	2.24		2.24	21.6	0.9	4.1	3.3	3.4	3	41522.9	USB4000-VIS-RF52054	SHMSL	U1426C-1H-2A, 74.0cm		1
346	U1426	C	1	H	2	A	76	2.26	2.26		2.26	25	0.3	2.9	4.2	4.4	4.2	41522.9	USB4000-VIS-RF52054	SHMSL	U1426C-1H-2A, 76.0cm		1
346	U1426	C	1	H	2	A	78	2.28	2.28		2.28	28	0.4	2	5.2	5.5	5.4	41522.9	USB4000-VIS-RF52054	SHMSL	U1426C-1H-2A, 78.0cm		1
346	U1426	C	1	H	2	A	80	2.3	2.3		2.3	34.2	0.9	-0.4	7.8	8.1	8.8	41522.9	USB4000-VIS-RF52054	SHMSL	U1426C-1H-2A, 80.0cm		1
346	U1426	C	1	H	2	A	82	2.32	2.32		2.32	39.2	1.5	-2.8	10.4	10.8	12.6	41522.9	USB4000-VIS-RF52054	SHMSL	U1426C-1H-2A, 82.0cm		1
346	U1426	C	1	H	2	A	84	2.34	2.34		2.34	33.3	0.7	0	7.3	7.7	8.2	41522.9	USB4000-VIS-RF52054	SHMSL	U1426C-1H-2A, 84.0cm		1
346	U1426	C	1	H	2	A	86	2.36	2.36		2.36	29.8	0.3	1.2	5.9	6.2	6.3	41522.9	USB4000-VIS-RF52054	SHMSL	U1426C-1H-2A, 86.0cm		1
346	U1426	C	1	H	2	A	88	2.38	2.38		2.38	30.5	0.4	0.6	6.1	6.4	6.7	41522.9	USB4000-VIS-RF52054	SHMSL	U1426C-1H-2A, 88.0cm		1
346	U1426	C	1	H	2	A	90	2.4	2.4		2.4	34.3	1.1	-1.6	7.9	8.2	9.2	41522.9	USB4000-VIS-RF52054	SHMSL	U1426C-1H-2A, 90.0cm		1
346	U1426	C	1	H	2	A	92	2.42	2.42		2.42	33.6	0.7	-0.7	7.5	7.8	8.6	41522.9	USB4000-VIS-RF52054	SHMSL	U1426C-1H-2A, 92.0cm		1
346	U1426	C	1	H	2	A	94	2.44	2.44		2.44	31.1	0.5	-0.4	6.4	6.7	7.3	41522.9	USB4000-VIS-RF52054	SHMSL	U1426C-1H-2A, 94.0cm		1
346	U1426	C	1	H	2	A	96	2.46	2.46		2.46	30.1	0.3	0.8	6	6.3	6.5	41522.9	USB4000-VIS-RF52054	SHMSL	U1426C-1H-2A, 96.0cm		1
346	U1426	C	1	H	2	A	98	2.48	2.48		2.48	35.4	0.9	-1.9	8.3	8.7	9.9	41522.9	USB4000-VIS-RF52054	SHMSL	U1426C-1H-2A, 98.0cm		1
346	U1426	C	1	H	2	A	100	2.5	2.5		2.5	32.1	0.6	-0.8	6.8	7.1	7.9	41522.9	USB4000-VIS-RF52054	SHMSL	U1426C-1H-2A, 100.0cm		1
346	U1426	C	1	H	2	A	102	2.52	2.52		2.52	31.8	0.4	-0.9	6.7	7	7.8	41522.9	USB4000-VIS-RF52054	SHMSL	U1426C-1H-2A, 102.0cm		1
346	U1426	C	1	H	2	A	104	2.54	2.54		2.54	33.1	0.3	-1.1	7.2	7.6	8.5	41522.9	USB4000-VIS-RF52054	SHMSL	U1426C-1H-2A, 104.0cm		1
346	U1426	C	1	H	2	A	106	2.56	2.56		2.56	33.4	0.5	-1.5	7.4	7.7	8.7	41522.9	USB4000-VIS-RF52054	SHMSL	U1426C-1H-2A, 106.0cm		1
346	U1426	C	1	H	2	A	108	2.58	2.58		2.58	32.4	0.2	-0.8	6.9	7.3	8	41522.9	USB4000-VIS-RF52054	SHMSL	U1426C-1H-2A, 108.0cm		1
346	U1426	C	1	H	2	A	110	2.6	2.6		2.6	34.4	0.4	-1.8	7.8	8.2	9.3	41522.9	USB4000-VIS-RF52054	SHMSL	U1426C-1H-2A, 110.0cm		1
346	U1426	C	1	H	2	A	112	2.62	2.62		2.62	33.5	0.1	-1.2	7.4	7.8	8.7	41522.9	USB4000-VIS-RF52054	SHMSL	U1426C-1H-2A, 112.0cm		1
346	U1426	C	1	H	2	A	114	2.64	2.64		2.64	37.9	0.8	-3	9.6	10.1	11.9	41522.9	USB4000-VIS-RF52054	SHMSL	U1426C-1H-2A, 114.0cm		1
346	U1426	C	1	H	2	A	116	2.66	2.66		2.66	36.4	0.2	-1.4	8.8	9.2	10.4	41522.9	USB4000-VIS-RF52054	SHMSL	U1426C-1H-2A, 116.0cm		1
346	U1426	C	1	H	2	A	118	2.68	2.68		2.68	36.5	0.2	-1.6	8.8	9.3	10.5	41522.9	USB4000-VIS-RF52054	SHMSL	U1426C-1H-2A, 118.0cm		1
346	U1426	C	1	H	2	A	120	2.7	2.7		2.7	35.3	0.3	-1.4	8.2	8.7	9.7	41522.9	USB4000-VIS-RF52054	SHMSL	U1426C-1H-2A, 120.0cm		1
346	U1426	C	1	H	2	A	122	2.72	2.72		2.72	35.8	0.3	-1.3	8.5	8.9	9.9	41522.9	USB4000-VIS-RF52054	SHMSL	U1426C-1H-2A, 122.0cm		1
346	U1426	C	1	H	2	A	124	2.74	2.74		2.74	35	0.1	-0.9	8.1	8.5	9.4	41522.9	USB4000-VIS-RF52054	SHMSL	U1426C-1H-2A, 124.0cm		1
346	U1426	C	1	H	2	A	126	2.76	2.76		2.76	34.1	0	-0.5	7.7	8.1	8.8	41522.9	USB4000-VIS-RF52054	SHMSL	U1426C-1H-2A, 126.0cm		1
346	U1426	C	1	H	2	A	128	2.78	2.78		2.78	34.5	0.3	-0.5	7.9	8.3	9	41522.9	USB4000-VIS-RF52054	SHMSL	U1426C-1H-2A, 128.0cm		1
346	U1426	C	1	H	2	A	130	2.8	2.8		2.8	33.4	0.7	-0.5	7.4	7.7	8.5	41522.9	USB4000-VIS-RF52054	SHMSL	U1426C-1H-2A, 130.0cm		1
346	U1426	C	1	H	2	A	132	2.82	2.82		2.82	41.1	1.3	-2.7	11.5	11.9	13.9	41522.9	USB4000-VIS-RF52054	SHMSL	U1426C-1H-2A, 132.0cm		1
346	U1426	C	1	H	2	A	134	2.84	2.84		2.84	33.5	0.6	0	7.4	7.8	8.3	41522.9	USB4000-VIS-RF52054	SHMSL	U1426C-1H-2A, 134.0cm		1
346	U1426	C	1	H	2	A	136	2.86	2.86		2.86	32.6	0.4	0.5	7	7.4	7.8	41522.9	USB4000-VIS-RF52054	SHMSL	U1426C-1H-2A, 136.0cm		1
346	U1426	C	1	H	2	A	138	2.88	2.88		2.88	35.8	0.4	-0.8	8.5	8.9	9.8	41522.9	USB4000-VIS-RF52054	SHMSL	U1426C-1H-2A, 138.0cm		1
346	U1426	C	1	H	2	A	140	2.9	2.9		2.9	33.1	0.3	0.2	7.2	7.6	8.1	41522.9	USB4000-VIS-RF52054	SHMSL	U1426C-1H-2A, 140.0cm		1
346	U1426	C	1	H	2	A	142	2.92	2.92		2.92	32.1	0.5	0.1	6.8	7.1	7.6	41522.9	USB4000-VIS-RF52054	SHMSL	U1426C-1H-2A, 142.0cm		1
346	U1426	C	1	H	2	A	144	2.94	2.94		2.94	32	0.4	0.3	6.7	7.1	7.5	41522.9	USB4000-VIS-RF52054	SHMSL	U1426C-1H-2A, 144.0cm		1
346	U1426	C	1	H	2	A	146	2.96	2.96		2.96	34.4	0.6	-0.6	7.8	8.2	9	41522.9	USB4000-VIS-RF52054	SHMSL	U1426C-1H-2A, 146.0cm		1
346	U1426	C	1	H	2	A	148	2.98	2.98		2.98	31.4	0.9	-1.3	6.5	6.8	7.7	41522.9	USB4000-VIS-RF52054	SHMSL	U1426C-1H-2A, 148.0cm		1
346	U1426	C	1	H	3	A	2	3.02	3.02		3.02	30.1	0.6	-0.3	6	6.3	6.8	41523	USB4000-VIS-RF52054	SHMSL	U1426C-1H-3A, 2.0cm		1
346	U1426	C	1	H	3	A	4	3.04	3.04		3.04	32.4	0.5	-0.4	6.9	7.3	7.9	41523	USB4000-VIS-RF52054	SHMSL	U1426C-1H-3A, 4.0cm		1
346	U1426	C	1	H	3	A	6	3.06	3.06		3.06	31.7	0.4	-0.3	6.6	6.9	7.5	41523	USB4000-VIS-RF52054	SHMSL	U1426C-1H-3A, 6.0cm		1
346	U1426	C	1	H	3	A	8	3.08	3.08		3.08	31	0.4	0.1	6.3	6.6	7.1	41523	USB4000-VIS-RF52054	SHMSL	U1426C-1H-3A, 8.0cm		1
346	U1426	C	1	H	3	A	10	3.1	3.1		3.1	31.9	0.3	0.3	6.7	7	7.5	41523	USB4000-VIS-RF52054	SHMSL	U1426C-1H-3A, 10.0cm		1
346	U1426	C	1	H	3	A	12	3.12	3.12		3.12	31.7	0.4	0.2	6.6	6.9	7.4	41523	USB4000-VIS-RF52054	SHMSL	U1426C-1H-3A, 12.0cm		1
346	U1426	C	1	H	3	A	14	3.14	3.14		3.14	32	0.3	0.7	6.7	7.1	7.4	41523	USB4000-VIS-RF52054	SHMSL	U1426C-1H-3A, 14.0cm		1
346	U1426	C	1	H	3	A	16	3.16	3.16		3.16	33.8	0.5	0.1	7.5	7.9	8.4	41523	USB4000-VIS-RF52054	SHMSL	U1426C-1H-3A, 16.0cm		1
346	U1426	C	1	H	3	A	18	3.18	3.18		3.18	34.4	0.7	-0.3	7.9	8.2	8.9	41523	USB4000-VIS-RF52054	SHMSL	U1426C-1H-3A, 18.0cm		1
346	U1426	C	1	H	3	A	20	3.2	3.2		3.2	34	0.5	0	7.7	8	8.6	41523	USB4000-VIS-RF52054	SHMSL	U1426C-1H-3A, 20.0cm		1
346	U1426	C	1	H	3	A	22	3.22	3.22		3.22	31.8	0.3	1.1	6.7	7	7.2	41523	USB4000-VIS-RF52054	SHMSL	U1426C-1H-3A, 22.0cm		1
346	U1426	C	1	H	3	A	24	3.24	3.24		3.24	34.7	0.6	0.1	8	8.3	8.9	41523	USB4000-VIS-RF52054	SHMSL	U1426C-1H-3A, 24.0cm		1
346	U1426	C	1	H	3	A	26	3.26	3.26		3.26	33.3	0.6	0.6	7.4	7.7	8.1	41523	USB4000-VIS-RF52054	SHMSL	U1426C-1H-3A, 26.0cm		1
346	U1426	C	1	H	3	A	28	3.28	3.28		3.28	32.6	0.5	0.8	7	7.3	7.7	41523	USB4000-VIS-RF52054	SHMSL	U1426C-1H-3A, 28.0cm		1
346	U1426	C	1	H	3	A	30	3.3	3.3		3.3	34.2	0.4	1.4	7.7	8.1	8.3	41523	USB4000-VIS-RF52054	SHMSL	U1426C-1H-3A, 30.0cm		1
346	U1426	C	1	H	3	A	32	3.32	3.32		3.32	32.9	0.4	1.6	7.1	7.5	7.6	41523	USB4000-VIS-RF52054	SHMSL	U1426C-1H-3A, 32.0cm		1
346	U1426	C	1	H	3	A	34	3.34	3.34		3.34	38.3	0.1	-0.9	9.8	10.3	11.3	41523	USB4000-VIS-RF52054	SHMSL	U1426C-1H-3A, 34.0cm		1
346	U1426	C	1	H	3	A	36	3.36	3.36		3.36	36.3	0.3	-0.4	8.7	9.1	10	41523	USB4000-VIS-RF52054	SHMSL	U1426C-1H-3A, 36.0cm		1
346	U1426	C	1	H	3	A	38	3.38	3.38		3.38	34.5	0.2	0.1	7.9	8.3	8.8	41523	USB4000-VIS-RF52054	SHMSL	U1426C-1H-3A, 38.0cm		1
346	U1426	C	1	H	3	A	40	3.4	3.4		3.4	42.2	1.3	-2.3	12.1	12.6	14.5	41523	USB4000-VIS-RF52054	SHMSL	U1426C-1H-3A, 40.0cm		1
346	U1426	C	1	H	3	A	42	3.42	3.42		3.42	33.9	0.4	0.9	7.6	8	8.3	41523	USB4000-VIS-RF52054	SHMSL	U1426C-1H-3A, 42.0cm		1
346	U1426	C	1	H	3	A	44	3.44	3.44		3.44	33.3	0.2	1.3	7.3	7.7	7.9	41523	USB4000-VIS-RF52054	SHMSL	U1426C-1H-3A, 44.0cm		1
346	U1426	C	1	H	3	A	46	3.46	3.46		3.46	37.3	0.7	-0.3	9.3	9.7	10.5	41523	USB4000-VIS-RF52054	SHMSL	U1426C-1H-3A, 46.0cm		1
346	U1426	C	1	H	3	A	48	3.48	3.48		3.48	37.9	0.6	-0.6	9.6	10	10.9	41523	USB4000-VIS-RF52054	SHMSL	U1426C-1H-3A, 48.0cm		1
346	U1426	C	1	H	3	A	50	3.5	3.5		3.5	35.9	0.4	0.2	8.5	9	9.5	41523	USB4000-VIS-RF52054	SHMSL	U1426C-1H-3A, 50.0cm		1
346	U1426	C	1	H	3	A	52	3.52	3.52		3.52	34.8	0.6	1	8	8.4	8.7	41523	USB4000-VIS-RF52054	SHMSL	U1426C-1H-3A, 52.0cm		1
346	U1426	C	1	H	3	A	54	3.54	3.54		3.54	40.4	1	-0.7	11	11.5	12.6	41523	USB4000-VIS-RF52054	SHMSL	U1426C-1H-3A, 54.0cm		1
346	U1426	C	1	H	3	A	56	3.56	3.56		3.56	36.6	0.7	0.1	8.9	9.3	10	41523	USB4000-VIS-RF52054	SHMSL	U1426C-1H-3A, 56.0cm		1
346	U1426	C	1	H	3	A	58	3.58	3.58		3.58	37.4	0.6	0.1	9.3	9.8	10.4	41523	USB4000-VIS-RF52054	SHMSL	U1426C-1H-3A, 58.0cm		1
346	U1426	C	1	H	3	A	60	3.6	3.6		3.6	36.8	0.3	0	9	9.4	10.1	41523	USB4000-VIS-RF52054	SHMSL	U1426C-1H-3A, 60.0cm		1
346	U1426	C	1	H	3	A	62	3.62	3.62		3.62	39.5	0.9	-1.4	10.5	11	12.3	41523	USB4000-VIS-RF52054	SHMSL	U1426C-1H-3A, 62.0cm		1
346	U1426	C	1	H	3	A	64	3.64	3.64		3.64	33.1	-0.3	2.8	7.2	7.6	7.4	41523	USB4000-VIS-RF52054	SHMSL	U1426C-1H-3A, 64.0cm		1
346	U1426	C	1	H	3	A	66	3.66	3.66		3.66	37.1	-0.1	0.1	9.1	9.6	10.3	41523	USB4000-VIS-RF52054	SHMSL	U1426C-1H-3A, 66.0cm		1
346	U1426	C	1	H	3	A	68	3.68	3.68		3.68	35.7	-0.2	0.8	8.4	8.8	9.2	41523	USB4000-VIS-RF52054	SHMSL	U1426C-1H-3A, 68.0cm		1
346	U1426	C	1	H	3	A	70	3.7	3.7		3.7	34.9	-0.1	1.2	8	8.4	8.7	41523	USB4000-VIS-RF52054	SHMSL	U1426C-1H-3A, 70.0cm		1
346	U1426	C	1	H	3	A	72	3.72	3.72		3.72	35.5	-0.1	0.9	8.3	8.8	9.1	41523	USB4000-VIS-RF52054	SHMSL	U1426C-1H-3A, 72.0cm		1
346	U1426	A	2	H	1	A	54	3.04	3.74		3.74007	39.5	-0.2	0.4	10.3	10.9	11.6	41520.4	USB4000-VIS-RF52054	SHMSL	U1426A-2H-1A, 54.0cm		2
346	U1426	A	2	H	1	A	55	3.05	3.75		3.75007	39.5	-0.1	0.4	10.4	11	11.6	41520.4	USB4000-VIS-RF52054	SHMSL	U1426A-2H-1A, 55.0cm		2
346	U1426	A	2	H	1	A	56	3.06	3.76		3.76007	39.5	0.2	0.2	10.4	10.9	11.7	41520.4	USB4000-VIS-RF52054	SHMSL	U1426A-2H-1A, 56.0cm		2
346	U1426	A	2	H	1	A	57	3.07	3.77		3.77007	40	0.3	0.7	10.7	11.3	11.9	41520.4	USB4000-VIS-RF52054	SHMSL	U1426A-2H-1A, 57.0cm		2
346	U1426	A	2	H	1	A	58	3.08	3.78		3.78007	39.8	0.3	0.7	10.6	11.2	11.7	41520.4	USB4000-VIS-RF52054	SHMSL	U1426A-2H-1A, 58.0cm		2
346	U1426	A	2	H	1	A	59	3.09	3.79		3.79007	42.1	0.9	0.4	12	12.6	13.3	41520.4	USB4000-VIS-RF52054	SHMSL	U1426A-2H-1A, 59.0cm		2
346	U1426	A	2	H	1	A	60	3.1	3.8		3.80007	43.1	1.3	0.2	12.7	13.2	14.1	41520.4	USB4000-VIS-RF52054	SHMSL	U1426A-2H-1A, 60.0cm		2
346	U1426	A	2	H	1	A	61	3.11	3.81		3.81007	43.8	1.9	-0.3	13.3	13.7	14.8	41520.4	USB4000-VIS-RF52054	SHMSL	U1426A-2H-1A, 61.0cm		2
346	U1426	A	2	H	1	A	62	3.12	3.82		3.82007	43.1	2.1	-0.6	12.8	13.2	14.4	41520.4	USB4000-VIS-RF52054	SHMSL	U1426A-2H-1A, 62.0cm		2
346	U1426	A	2	H	1	A	63	3.13	3.83		3.83007	41.4	1.9	-0.4	11.7	12.1	13.2	41520.4	USB4000-VIS-RF52054	SHMSL	U1426A-2H-1A, 63.0cm		2
346	U1426	A	2	H	1	A	64	3.14	3.84		3.84007	40.3	1.8	-0.2	11.1	11.4	12.3	41520.4	USB4000-VIS-RF52054	SHMSL	U1426A-2H-1A, 64.0cm		2
346	U1426	A	2	H	1	A	65	3.15	3.85		3.85007	41.5	1.9	-0.9	11.8	12.2	13.5	41520.4	USB4000-VIS-RF52054	SHMSL	U1426A-2H-1A, 65.0cm		2
346	U1426	A	2	H	1	A	66	3.16	3.86		3.86007	41.5	1.8	-0.7	11.8	12.2	13.3	41520.4	USB4000-VIS-RF52054	SHMSL	U1426A-2H-1A, 66.0cm		2
346	U1426	A	2	H	1	A	67	3.17	3.87		3.87007	42.6	2.1	-1.5	12.6	12.9	14.5	41520.4	USB4000-VIS-RF52054	SHMSL	U1426A-2H-1A, 67.0cm		2
346	U1426	A	2	H	1	A	68	3.18	3.88		3.88007	39.4	2	-2	10.6	10.9	12.4	41520.4	USB4000-VIS-RF52054	SHMSL	U1426A-2H-1A, 68.0cm		2
346	U1426	A	2	H	1	A	69	3.19	3.89		3.89007	37.7	1.8	-1.9	9.6	9.9	11.3	41520.4	USB4000-VIS-RF52054	SHMSL	U1426A-2H-1A, 69.0cm		2
346	U1426	A	2	H	1	A	70	3.2	3.9		3.90007	37.4	1.9	-2.7	9.5	9.8	11.4	41520.4	USB4000-VIS-RF52054	SHMSL	U1426A-2H-1A, 70.0cm		2
346	U1426	A	2	H	1	A	71	3.21	3.91		3.91007	33.5	1.9	-3.9	7.6	7.8	9.5	41520.4	USB4000-VIS-RF52054	SHMSL	U1426A-2H-1A, 71.0cm		2
346	U1426	A	2	H	1	A	72	3.22	3.92		3.92007	31.9	0.6	-0.8	6.7	7.1	7.8	41520.4	USB4000-VIS-RF52054	SHMSL	U1426A-2H-1A, 72.0cm		2
346	U1426	A	2	H	1	A	73	3.23	3.93		3.93007	38.4	0.6	-0.8	9.8	10.3	11.3	41520.4	USB4000-VIS-RF52054	SHMSL	U1426A-2H-1A, 73.0cm		2
346	U1426	A	2	H	1	A	74	3.24	3.94		3.94007	37.3	0.4	-0.5	9.3	9.7	10.6	41520.4	USB4000-VIS-RF52054	SHMSL	U1426A-2H-1A, 74.0cm		2
346	U1426	A	2	H	1	A	75	3.25	3.95		3.95007	35.5	1.1	-0.7	8.4	8.7	9.6	41520.4	USB4000-VIS-RF52054	SHMSL	U1426A-2H-1A, 75.0cm		2
346	U1426	A	2	H	1	A	76	3.26	3.96		3.96007	27.6	1.5	-2.4	5.2	5.3	6.3	41520.4	USB4000-VIS-RF52054	SHMSL	U1426A-2H-1A, 76.0cm		2
346	U1426	A	2	H	1	A	77	3.27	3.97		3.97007	39.9	1.8	-2	10.9	11.2	12.8	41520.4	USB4000-VIS-RF52054	SHMSL	U1426A-2H-1A, 77.0cm		2
346	U1426	A	2	H	1	A	78	3.28	3.98		3.98007	34.2	1.5	-2.6	7.9	8.1	9.5	41520.4	USB4000-VIS-RF52054	SHMSL	U1426A-2H-1A, 78.0cm		2
346	U1426	A	2	H	1	A	79	3.29	3.99		3.99007	25	1.3	-3.7	4.3	4.4	5.5	41520.4	USB4000-VIS-RF52054	SHMSL	U1426A-2H-1A, 79.0cm		2
346	U1426	A	2	H	1	A	80	3.3	4		4.00007	22.8	1.3	-3.8	3.6	3.7	4.7	41520.4	USB4000-VIS-RF52054	SHMSL	U1426A-2H-1A, 80.0cm		2
346	U1426	A	2	H	1	A	81	3.31	4.01		4.01007	32.8	0.8	-1.3	7.1	7.4	8.4	41520.4	USB4000-VIS-RF52054	SHMSL	U1426A-2H-1A, 81.0cm		2
346	U1426	A	2	H	1	A	82	3.32	4.02		4.02007	38.1	0.5	-0.1	9.7	10.1	10.9	41520.4	USB4000-VIS-RF52054	SHMSL	U1426A-2H-1A, 82.0cm		2
346	U1426	A	2	H	1	A	83	3.33	4.03		4.03007	37.1	0.2	0.9	9.1	9.6	10	41520.4	USB4000-VIS-RF52054	SHMSL	U1426A-2H-1A, 83.0cm		2
346	U1426	A	2	H	1	A	84	3.34	4.04		4.04007	34.1	0.3	1.5	7.7	8	8.2	41520.4	USB4000-VIS-RF52054	SHMSL	U1426A-2H-1A, 84.0cm		2
346	U1426	A	2	H	1	A	85	3.35	4.05		4.05007	34	0.5	1.2	7.6	8	8.2	41520.4	USB4000-VIS-RF52054	SHMSL	U1426A-2H-1A, 85.0cm		2
346	U1426	A	2	H	1	A	86	3.36	4.06		4.06007	32.7	0.4	2.3	7.1	7.4	7.3	41520.4	USB4000-VIS-RF52054	SHMSL	U1426A-2H-1A, 86.0cm		2
346	U1426	A	2	H	1	A	87	3.37	4.07		4.07007	31.6	0.3	2.8	6.6	6.9	6.7	41520.4	USB4000-VIS-RF52054	SHMSL	U1426A-2H-1A, 87.0cm		2
346	U1426	A	2	H	1	A	88	3.38	4.08		4.08007	32.3	0	3.1	6.9	7.2	6.9	41520.4	USB4000-VIS-RF52054	SHMSL	U1426A-2H-1A, 88.0cm		2
346	U1426	A	2	H	1	A	89	3.39	4.09		4.09007	32.9	0	2.4	7.1	7.5	7.4	41520.4	USB4000-VIS-RF52054	SHMSL	U1426A-2H-1A, 89.0cm		2
346	U1426	A	2	H	1	A	90	3.4	4.1		4.10007	32.2	0	2.6	6.8	7.2	7	41520.4	USB4000-VIS-RF52054	SHMSL	U1426A-2H-1A, 90.0cm		2
346	U1426	A	2	H	1	A	91	3.41	4.11		4.11007	32.3	-0.2	2.2	6.8	7.2	7.1	41520.4	USB4000-VIS-RF52054	SHMSL	U1426A-2H-1A, 91.0cm		2
346	U1426	A	2	H	1	A	92	3.42	4.12		4.12007	32	-0.2	2.1	6.7	7.1	7	41520.4	USB4000-VIS-RF52054	SHMSL	U1426A-2H-1A, 92.0cm		2
346	U1426	A	2	H	1	A	93	3.43	4.13		4.13007	31.8	-0.1	2.7	6.6	7	6.8	41520.4	USB4000-VIS-RF52054	SHMSL	U1426A-2H-1A, 93.0cm		2
346	U1426	A	2	H	1	A	94	3.44	4.14		4.14007	32.1	0.1	2.8	6.7	7.1	6.9	41520.4	USB4000-VIS-RF52054	SHMSL	U1426A-2H-1A, 94.0cm		2
346	U1426	A	2	H	1	A	95	3.45	4.15		4.15007	30.3	-0.1	3.3	6	6.4	6	41520.4	USB4000-VIS-RF52054	SHMSL	U1426A-2H-1A, 95.0cm		2
346	U1426	A	2	H	1	A	96	3.46	4.16		4.16007	29.7	0	3.5	5.8	6.1	5.7	41520.4	USB4000-VIS-RF52054	SHMSL	U1426A-2H-1A, 96.0cm		2
346	U1426	A	2	H	1	A	97	3.47	4.17		4.17007	28.2	0.1	3.2	5.3	5.5	5.2	41520.4	USB4000-VIS-RF52054	SHMSL	U1426A-2H-1A, 97.0cm		2
346	U1426	A	2	H	1	A	98	3.48	4.18		4.18007	29.6	0.1	1.5	5.8	6.1	6.2	41520.4	USB4000-VIS-RF52054	SHMSL	U1426A-2H-1A, 98.0cm		2
346	U1426	A	2	H	1	A	99	3.49	4.19		4.19007	31	-0.3	1.4	6.3	6.7	6.8	41520.4	USB4000-VIS-RF52054	SHMSL	U1426A-2H-1A, 99.0cm		2
346	U1426	A	2	H	1	A	100	3.5	4.2		4.20007	32.4	-0.1	1.2	6.9	7.3	7.4	41520.4	USB4000-VIS-RF52054	SHMSL	U1426A-2H-1A, 100.0cm		2
346	U1426	A	2	H	1	A	101	3.51	4.21		4.21007	31	-0.1	1.6	6.3	6.6	6.7	41520.4	USB4000-VIS-RF52054	SHMSL	U1426A-2H-1A, 101.0cm		2
346	U1426	A	2	H	1	A	102	3.52	4.22		4.22007	32.5	0.1	0.7	6.9	7.3	7.7	41520.4	USB4000-VIS-RF52054	SHMSL	U1426A-2H-1A, 102.0cm		2
346	U1426	A	2	H	1	A	103	3.53	4.23		4.23007	31.2	0	1.7	6.4	6.7	6.8	41520.4	USB4000-VIS-RF52054	SHMSL	U1426A-2H-1A, 103.0cm		2
346	U1426	A	2	H	1	A	104	3.54	4.24		4.24007	30	-0.1	2.5	5.9	6.2	6.1	41520.4	USB4000-VIS-RF52054	SHMSL	U1426A-2H-1A, 104.0cm		2
346	U1426	A	2	H	1	A	105	3.55	4.25		4.25007	29.1	0	2.4	5.6	5.9	5.7	41520.4	USB4000-VIS-RF52054	SHMSL	U1426A-2H-1A, 105.0cm		2
346	U1426	A	2	H	1	A	106	3.56	4.26		4.26007	28.2	0	3	5.2	5.5	5.3	41520.4	USB4000-VIS-RF52054	SHMSL	U1426A-2H-1A, 106.0cm		2
346	U1426	A	2	H	1	A	107	3.57	4.27		4.27007	27.2	0.1	4.2	4.9	5.2	4.7	41520.4	USB4000-VIS-RF52054	SHMSL	U1426A-2H-1A, 107.0cm		2
346	U1426	A	2	H	1	A	108	3.58	4.28		4.28007	30.9	-0.2	3.2	6.2	6.6	6.3	41520.4	USB4000-VIS-RF52054	SHMSL	U1426A-2H-1A, 108.0cm		2
346	U1426	A	2	H	1	A	109	3.59	4.29		4.29007	32.1	-0.2	2.8	6.7	7.1	6.9	41520.4	USB4000-VIS-RF52054	SHMSL	U1426A-2H-1A, 109.0cm		2
346	U1426	A	2	H	1	A	110	3.6	4.3		4.30007	32.3	0.1	1.8	6.8	7.2	7.3	41520.4	USB4000-VIS-RF52054	SHMSL	U1426A-2H-1A, 110.0cm		2
346	U1426	A	2	H	1	A	111	3.61	4.31		4.31007	32.1	0	1.9	6.7	7.1	7.1	41520.4	USB4000-VIS-RF52054	SHMSL	U1426A-2H-1A, 111.0cm		2
346	U1426	A	2	H	1	A	112	3.62	4.32		4.32007	31.4	0.1	1.6	6.5	6.8	6.9	41520.4	USB4000-VIS-RF52054	SHMSL	U1426A-2H-1A, 112.0cm		2
346	U1426	A	2	H	1	A	113	3.63	4.33		4.33007	31	-0.1	2.4	6.3	6.6	6.5	41520.4	USB4000-VIS-RF52054	SHMSL	U1426A-2H-1A, 113.0cm		2
346	U1426	A	2	H	1	A	114	3.64	4.34		4.34007	29.3	-0.1	3.4	5.6	6	5.6	41520.4	USB4000-VIS-RF52054	SHMSL	U1426A-2H-1A, 114.0cm		2
346	U1426	A	2	H	1	A	115	3.65	4.35		4.35007	28.8	0.2	3.5	5.5	5.8	5.4	41520.4	USB4000-VIS-RF52054	SHMSL	U1426A-2H-1A, 115.0cm		2
346	U1426	A	2	H	1	A	116	3.66	4.36		4.36007	28.1	0.1	4	5.2	5.5	5	41520.4	USB4000-VIS-RF52054	SHMSL	U1426A-2H-1A, 116.0cm		2
346	U1426	A	2	H	1	A	117	3.67	4.37		4.37007	30.8	0.4	3.2	6.3	6.6	6.2	41520.4	USB4000-VIS-RF52054	SHMSL	U1426A-2H-1A, 117.0cm		2
346	U1426	A	2	H	1	A	118	3.68	4.38		4.38007	27	0.9	-0.3	4.9	5.1	5.5	41520.4	USB4000-VIS-RF52054	SHMSL	U1426A-2H-1A, 118.0cm		2
346	U1426	A	2	H	1	A	119	3.69	4.39		4.39007	26.5	0.6	2.2	4.7	4.9	4.8	41520.4	USB4000-VIS-RF52054	SHMSL	U1426A-2H-1A, 119.0cm		2
346	U1426	A	2	H	1	A	120	3.7	4.4		4.40007	30.6	1	1.4	6.2	6.5	6.6	41520.4	USB4000-VIS-RF52054	SHMSL	U1426A-2H-1A, 120.0cm		2
346	U1426	A	2	H	1	A	121	3.71	4.41		4.41007	31.5	1	0.6	6.6	6.9	7.2	41520.4	USB4000-VIS-RF52054	SHMSL	U1426A-2H-1A, 121.0cm		2
346	U1426	C	1	H	3	A	136	4.36			4.42007	27	0.1	4.3	4.8	5.1	4.6							1
346	U1426	C	1	H	3	A	138	4.38			4.44007	32.3	-0.1	2.8	6.8	7.2	7							1
346	U1426	C	1	H	3	A	140	4.4			4.46007	32.3	0.1	1.6	6.9	7.2	7.3							1
346	U1426	C	1	H	3	A	142	4.42			4.48007	33	0	2.2	7.1	7.5	7.5							1
346	U1426	C	1	H	3	A	144	4.44			4.50007	32.6	0.2	2	7	7.3	7.3							1
346	U1426	C	1	H	3	A	146	4.46			4.52007	32	0.2	1.7	6.8	7.1	7.2							1
346	U1426	C	1	H	3	A	148	4.48			4.54007	33	1.1	-0.4	7.3	7.5	8.2							1
346	U1426	C	1	H	3	A	150	4.5			4.56007	38.8	1.9	-4.6	10.2	10.5	13							1
346	U1426	C	1	H	4	A	2	4.52			4.58007	26.1	0.3	2.7	4.5	4.8	4.6							1
346	U1426	C	1	H	4	A	4	4.54			4.60007	25.9	0.5	3.8	4.5	4.7	4.3							1
346	U1426	C	1	H	4	A	6	4.56			4.62007	31.1	0.9	0.8	6.4	6.7	7							1
346	U1426	C	1	H	4	A	8	4.58			4.64007	26.6	0.5	4	4.7	5	4.5							1
346	U1426	C	1	H	4	A	10	4.6			4.66007	26.9	0.4	4.9	4.8	5.1	4.4							1
346	U1426	C	1	H	4	A	12	4.62			4.68007	25	0.5	4.4	4.2	4.4	3.9							1
346	U1426	C	1	H	4	A	14	4.64			4.70007	30.3	-0.4	2.6	6	6.4	6.2							1
346	U1426	C	1	H	4	A	16	4.66			4.72007	33	-0.3	2.1	7.1	7.6	7.5							1
346	U1426	C	1	H	4	A	18	4.68			4.74007	33.4	-0.5	1.7	7.3	7.7	7.8							1
346	U1426	C	1	H	4	A	20	4.7			4.76007	35.1	-0.3	0.6	8.1	8.6	9							1
346	U1426	C	1	H	4	A	22	4.72			4.78007	35.6	-0.3	0.7	8.3	8.8	9.2							1
346	U1426	C	1	H	4	A	24	4.74			4.80007	35	-0.4	0.7	8	8.5	8.9							1
346	U1426	C	1	H	4	A	26	4.76			4.82007	35	-0.5	1.3	8	8.5	8.7							1
346	U1426	C	1	H	4	A	28	4.78			4.84007	34.9	-0.6	2.7	8	8.5	8.3							1
346	U1426	C	1	H	4	A	30	4.8			4.86007	34.3	-0.3	2.6	7.7	8.2	8							1
346	U1426	C	1	H	4	A	32	4.82			4.88007	33.9	-0.2	2.7	7.5	8	7.8							1
346	U1426	C	1	H	4	A	34	4.84			4.90007	35.6	1.2	1	8.5	8.8	9.1							1
346	U1426	C	1	H	4	A	36	4.86			4.92007	33	-0.4	3.4	7.1	7.5	7.2							1
346	U1426	C	1	H	4	A	38	4.88			4.94007	32.4	-0.2	3.3	6.8	7.2	6.9							1
346	U1426	C	1	H	4	A	40	4.9			4.96007	33.3	-0.1	4.2	7.3	7.7	7.1							1
346	U1426	C	1	H	4	A	42	4.92			4.98007	36.9	0.6	2.6	9.1	9.5	9.3							1
346	U1426	C	1	H	4	A	44	4.94			5.00007	46.4	1.6	-1.2	15.1	15.6	17.3							1
346	U1426	A	2	H	2	A	33	4.33	5.03		5.01007	28.7	-0.2	5	5.4	5.7	5	41520.5	USB4000-VIS-RF52054	SHMSL	U1426A-2H-2A, 33.0cm		2
346	U1426	A	2	H	2	A	34	4.34	5.04		5.02007	27.8	-0.1	5.6	5.1	5.4	4.6	41520.5	USB4000-VIS-RF52054	SHMSL	U1426A-2H-2A, 34.0cm		2
346	U1426	A	2	H	2	A	35	4.35	5.05		5.03007	27	0.2	5.2	4.9	5.1	4.4	41520.5	USB4000-VIS-RF52054	SHMSL	U1426A-2H-2A, 35.0cm		2
346	U1426	A	2	H	2	A	36	4.36	5.06		5.04007	27.3	0.2	5	4.9	5.2	4.5	41520.5	USB4000-VIS-RF52054	SHMSL	U1426A-2H-2A, 36.0cm		2
346	U1426	A	2	H	2	A	37	4.37	5.07		5.05007	27.5	0.4	4.6	5	5.3	4.7	41520.5	USB4000-VIS-RF52054	SHMSL	U1426A-2H-2A, 37.0cm		2
346	U1426	A	2	H	2	A	38	4.38	5.08		5.06007	28	0.1	4.2	5.2	5.5	5	41520.5	USB4000-VIS-RF52054	SHMSL	U1426A-2H-2A, 38.0cm		2
346	U1426	A	2	H	2	A	39	4.39	5.09		5.07007	31	-0.2	3.6	6.3	6.6	6.2	41520.5	USB4000-VIS-RF52054	SHMSL	U1426A-2H-2A, 39.0cm		2
346	U1426	A	2	H	2	A	40	4.4	5.1		5.08007	31.4	-0.4	4	6.4	6.8	6.3	41520.5	USB4000-VIS-RF52054	SHMSL	U1426A-2H-2A, 40.0cm		2
346	U1426	A	2	H	2	A	41	4.41	5.11		5.09007	30.9	-0.4	3.8	6.2	6.6	6.1	41520.5	USB4000-VIS-RF52054	SHMSL	U1426A-2H-2A, 41.0cm		2
346	U1426	A	2	H	2	A	42	4.42	5.12		5.10007	33	-0.2	2.4	7.1	7.5	7.4	41520.5	USB4000-VIS-RF52054	SHMSL	U1426A-2H-2A, 42.0cm		2
346	U1426	A	2	H	2	A	43	4.43	5.13		5.11007	31.4	-0.2	3.9	6.4	6.8	6.3	41520.5	USB4000-VIS-RF52054	SHMSL	U1426A-2H-2A, 43.0cm		2
346	U1426	A	2	H	2	A	44	4.44	5.14		5.12007	31	-0.3	4.3	6.3	6.6	6.1	41520.5	USB4000-VIS-RF52054	SHMSL	U1426A-2H-2A, 44.0cm		2
346	U1426	A	2	H	2	A	45	4.45	5.15		5.13007	30	-0.5	5.5	5.9	6.2	5.4	41520.5	USB4000-VIS-RF52054	SHMSL	U1426A-2H-2A, 45.0cm		2
346	U1426	A	2	H	2	A	46	4.46	5.16		5.14007	29.1	0	5.5	5.6	5.9	5.1	41520.5	USB4000-VIS-RF52054	SHMSL	U1426A-2H-2A, 46.0cm		2
346	U1426	A	2	H	2	A	47	4.47	5.17		5.15007	29	0	5.5	5.5	5.8	5	41520.5	USB4000-VIS-RF52054	SHMSL	U1426A-2H-2A, 47.0cm		2
346	U1426	A	2	H	2	A	48	4.48	5.18		5.16007	30.4	0.1	4.4	6.1	6.4	5.8	41520.5	USB4000-VIS-RF52054	SHMSL	U1426A-2H-2A, 48.0cm		2
346	U1426	A	2	H	2	A	49	4.49	5.19		5.17007	28.2	0.1	5.3	5.3	5.5	4.8	41520.5	USB4000-VIS-RF52054	SHMSL	U1426A-2H-2A, 49.0cm		2
346	U1426	A	2	H	2	A	50	4.5	5.2		5.18007	30	0.2	4.5	5.9	6.2	5.6	41520.5	USB4000-VIS-RF52054	SHMSL	U1426A-2H-2A, 50.0cm		2
346	U1426	A	2	H	2	A	51	4.51	5.21		5.19007	28.2	0.3	5.3	5.3	5.5	4.8	41520.5	USB4000-VIS-RF52054	SHMSL	U1426A-2H-2A, 51.0cm		2
346	U1426	A	2	H	2	A	52	4.52	5.22		5.20007	29.2	0.1	4.6	5.6	5.9	5.3	41520.5	USB4000-VIS-RF52054	SHMSL	U1426A-2H-2A, 52.0cm		2
346	U1426	A	2	H	2	A	53	4.53	5.23		5.21007	27.7	0.2	5.6	5.1	5.3	4.6	41520.5	USB4000-VIS-RF52054	SHMSL	U1426A-2H-2A, 53.0cm		2
346	U1426	A	2	H	2	A	54	4.54	5.24		5.22007	25.7	0	6.4	4.4	4.6	3.8	41520.5	USB4000-VIS-RF52054	SHMSL	U1426A-2H-2A, 54.0cm		2
346	U1426	A	2	H	2	A	55	4.55	5.25		5.23007	25.9	0.2	6.6	4.5	4.7	3.8	41520.5	USB4000-VIS-RF52054	SHMSL	U1426A-2H-2A, 55.0cm		2
346	U1426	A	2	H	2	A	56	4.56	5.26		5.24007	27.1	0.6	5.3	4.9	5.1	4.4	41520.5	USB4000-VIS-RF52054	SHMSL	U1426A-2H-2A, 56.0cm		2
346	U1426	A	2	H	2	A	57	4.57	5.27		5.25007	28	0.2	4.9	5.2	5.4	4.8	41520.5	USB4000-VIS-RF52054	SHMSL	U1426A-2H-2A, 57.0cm		2
346	U1426	A	2	H	2	A	58	4.58	5.28		5.26007	29	-0.3	4.9	5.5	5.8	5.1	41520.5	USB4000-VIS-RF52054	SHMSL	U1426A-2H-2A, 58.0cm		2
346	U1426	A	2	H	2	A	59	4.59	5.29		5.27007	30.9	-0.4	3.7	6.2	6.6	6.2	41520.5	USB4000-VIS-RF52054	SHMSL	U1426A-2H-2A, 59.0cm		2
346	U1426	A	2	H	2	A	60	4.6	5.3		5.28007	31.4	-0.3	3.1	6.4	6.8	6.5	41520.5	USB4000-VIS-RF52054	SHMSL	U1426A-2H-2A, 60.0cm		2
346	U1426	A	2	H	2	A	61	4.61	5.31		5.29007	33.7	0	1.9	7.5	7.9	7.9	41520.5	USB4000-VIS-RF52054	SHMSL	U1426A-2H-2A, 61.0cm		2
346	U1426	A	2	H	2	A	62	4.62	5.32		5.30007	31.5	-0.3	3.1	6.5	6.9	6.6	41520.5	USB4000-VIS-RF52054	SHMSL	U1426A-2H-2A, 62.0cm		2
346	U1426	A	2	H	2	A	63	4.63	5.33		5.31007	33	-0.3	3.2	7.1	7.5	7.2	41520.5	USB4000-VIS-RF52054	SHMSL	U1426A-2H-2A, 63.0cm		2
346	U1426	A	2	H	2	A	64	4.64	5.34		5.32007	32.5	-0.3	3.7	6.9	7.3	6.8	41520.5	USB4000-VIS-RF52054	SHMSL	U1426A-2H-2A, 64.0cm		2
346	U1426	A	2	H	2	A	65	4.65	5.35		5.33007	31	-0.5	4.6	6.3	6.6	6	41520.5	USB4000-VIS-RF52054	SHMSL	U1426A-2H-2A, 65.0cm		2
346	U1426	A	2	H	2	A	66	4.66	5.36		5.34007	31.9	-0.3	4.1	6.7	7.1	6.5	41520.5	USB4000-VIS-RF52054	SHMSL	U1426A-2H-2A, 66.0cm		2
346	U1426	A	2	H	2	A	67	4.67	5.37		5.35007	30.7	-0.6	5.5	6.1	6.5	5.6	41520.5	USB4000-VIS-RF52054	SHMSL	U1426A-2H-2A, 67.0cm		2
346	U1426	A	2	H	2	A	68	4.68	5.38		5.36007	30.2	-0.3	5.5	6	6.3	5.5	41520.5	USB4000-VIS-RF52054	SHMSL	U1426A-2H-2A, 68.0cm		2
346	U1426	A	2	H	2	A	69	4.69	5.39		5.37007	29.4	0	5.4	5.7	6	5.2	41520.5	USB4000-VIS-RF52054	SHMSL	U1426A-2H-2A, 69.0cm		2
346	U1426	A	2	H	2	A	70	4.7	5.4		5.38007	27.4	0.3	5.8	5	5.2	4.4	41520.5	USB4000-VIS-RF52054	SHMSL	U1426A-2H-2A, 70.0cm		2
346	U1426	A	2	H	2	A	71	4.71	5.41		5.39007	27.1	0.2	5.9	4.9	5.1	4.3	41520.5	USB4000-VIS-RF52054	SHMSL	U1426A-2H-2A, 71.0cm		2
346	U1426	A	2	H	2	A	72	4.72	5.42		5.40007	32.8	0.5	3.4	7.1	7.4	7.1	41520.5	USB4000-VIS-RF52054	SHMSL	U1426A-2H-2A, 72.0cm		2
346	U1426	A	2	H	2	A	73	4.73	5.43		5.41007	28.6	0.2	6.2	5.4	5.7	4.7	41520.5	USB4000-VIS-RF52054	SHMSL	U1426A-2H-2A, 73.0cm		2
346	U1426	A	2	H	2	A	74	4.74	5.44		5.42007	29.8	0.6	5.4	5.9	6.1	5.3	41520.5	USB4000-VIS-RF52054	SHMSL	U1426A-2H-2A, 74.0cm		2
346	U1426	A	2	H	2	A	75	4.75	5.45		5.43007	29.2	0.3	6.6	5.6	5.9	4.9	41520.5	USB4000-VIS-RF52054	SHMSL	U1426A-2H-2A, 75.0cm		2
346	U1426	A	2	H	2	A	76	4.76	5.46		5.44007	30.4	0.5	5.2	6.1	6.4	5.6	41520.5	USB4000-VIS-RF52054	SHMSL	U1426A-2H-2A, 76.0cm		2
346	U1426	A	2	H	2	A	77	4.77	5.47		5.45007	29.3	0.4	6	5.7	6	5	41520.5	USB4000-VIS-RF52054	SHMSL	U1426A-2H-2A, 77.0cm		2
346	U1426	A	2	H	2	A	78	4.78	5.48		5.46007	27.3	0.3	5.5	5	5.2	4.4	41520.5	USB4000-VIS-RF52054	SHMSL	U1426A-2H-2A, 78.0cm		2
346	U1426	A	2	H	2	A	79	4.79	5.49		5.47007	27.2	0.2	6	4.9	5.2	4.3	41520.5	USB4000-VIS-RF52054	SHMSL	U1426A-2H-2A, 79.0cm		2
346	U1426	A	2	H	2	A	80	4.8	5.5		5.48007	27.1	0.2	6.9	4.9	5.1	4.1	41520.5	USB4000-VIS-RF52054	SHMSL	U1426A-2H-2A, 80.0cm		2
346	U1426	A	2	H	2	A	81	4.81	5.51		5.49007	27.1	0.3	6.2	4.9	5.1	4.2	41520.5	USB4000-VIS-RF52054	SHMSL	U1426A-2H-2A, 81.0cm		2
346	U1426	A	2	H	2	A	82	4.82	5.52		5.50007	27.1	0.3	6.3	4.9	5.1	4.2	41520.5	USB4000-VIS-RF52054	SHMSL	U1426A-2H-2A, 82.0cm		2
346	U1426	A	2	H	2	A	83	4.83	5.53		5.51007	27.1	0.4	6.2	4.9	5.1	4.2	41520.5	USB4000-VIS-RF52054	SHMSL	U1426A-2H-2A, 83.0cm		2
346	U1426	A	2	H	2	A	84	4.84	5.54		5.52007	28.4	0.4	5.5	5.4	5.6	4.8	41520.5	USB4000-VIS-RF52054	SHMSL	U1426A-2H-2A, 84.0cm		2
346	U1426	A	2	H	2	A	85	4.85	5.55		5.53007	27.6	0.2	6.4	5	5.3	4.4	41520.5	USB4000-VIS-RF52054	SHMSL	U1426A-2H-2A, 85.0cm		2
346	U1426	A	2	H	2	A	86	4.86	5.56		5.54007	27.7	0.4	5.9	5.1	5.3	4.5	41520.5	USB4000-VIS-RF52054	SHMSL	U1426A-2H-2A, 86.0cm		2
346	U1426	A	2	H	2	A	87	4.87	5.57		5.55007	27.5	0.4	6.1	5	5.3	4.4	41520.5	USB4000-VIS-RF52054	SHMSL	U1426A-2H-2A, 87.0cm		2
346	U1426	A	2	H	2	A	88	4.88	5.58		5.56007	27.6	0.5	5.7	5.1	5.3	4.5	41520.5	USB4000-VIS-RF52054	SHMSL	U1426A-2H-2A, 88.0cm		2
346	U1426	A	2	H	2	A	89	4.89	5.59		5.57007	27.7	0.5	5.4	5.1	5.4	4.6	41520.5	USB4000-VIS-RF52054	SHMSL	U1426A-2H-2A, 89.0cm		2
346	U1426	A	2	H	2	A	90	4.9	5.6		5.58007	27.6	0.5	5.5	5.1	5.3	4.5	41520.5	USB4000-VIS-RF52054	SHMSL	U1426A-2H-2A, 90.0cm		2
346	U1426	A	2	H	2	A	91	4.91	5.61		5.59007	28.6	0.5	5.3	5.4	5.7	4.9	41520.5	USB4000-VIS-RF52054	SHMSL	U1426A-2H-2A, 91.0cm		2
346	U1426	A	2	H	2	A	92	4.92	5.62		5.60007	28.7	0.4	5.5	5.5	5.7	4.9	41520.5	USB4000-VIS-RF52054	SHMSL	U1426A-2H-2A, 92.0cm		2
346	U1426	A	2	H	2	A	93	4.93	5.63		5.61007	28	0	6.7	5.2	5.5	4.5	41520.5	USB4000-VIS-RF52054	SHMSL	U1426A-2H-2A, 93.0cm		2
346	U1426	A	2	H	2	A	94	4.94	5.64		5.62007	29.1	-0.3	5.7	5.5	5.9	5	41520.5	USB4000-VIS-RF52054	SHMSL	U1426A-2H-2A, 94.0cm		2
346	U1426	A	2	H	2	A	95	4.95	5.65		5.63007	32.8	-0.7	4.2	7	7.5	6.9	41520.5	USB4000-VIS-RF52054	SHMSL	U1426A-2H-2A, 95.0cm		2
346	U1426	A	2	H	2	A	96	4.96	5.66		5.64007	33.7	-0.5	3.9	7.4	7.9	7.4	41520.5	USB4000-VIS-RF52054	SHMSL	U1426A-2H-2A, 96.0cm		2
346	U1426	A	2	H	2	A	97	4.97	5.67		5.65007	34.8	-0.5	3	7.9	8.4	8.1	41520.5	USB4000-VIS-RF52054	SHMSL	U1426A-2H-2A, 97.0cm		2
346	U1426	A	2	H	2	A	98	4.98	5.68		5.66007	38.8	0	1.4	10	10.6	10.8	41520.5	USB4000-VIS-RF52054	SHMSL	U1426A-2H-2A, 98.0cm		2
346	U1426	A	2	H	2	A	99	4.99	5.69		5.67007	37.1	-0.3	1.9	9	9.6	9.6	41520.5	USB4000-VIS-RF52054	SHMSL	U1426A-2H-2A, 99.0cm		2
346	U1426	A	2	H	2	A	100	5	5.7		5.68007	36.8	-0.5	2.7	8.9	9.4	9.2	41520.5	USB4000-VIS-RF52054	SHMSL	U1426A-2H-2A, 100.0cm		2
346	U1426	A	2	H	2	A	101	5.01	5.71		5.69007	36	-0.6	3.5	8.5	9	8.6	41520.5	USB4000-VIS-RF52054	SHMSL	U1426A-2H-2A, 101.0cm		2
346	U1426	A	2	H	2	A	102	5.02	5.72		5.70007	35.8	-0.6	3.4	8.4	8.9	8.5	41520.5	USB4000-VIS-RF52054	SHMSL	U1426A-2H-2A, 102.0cm		2
346	U1426	A	2	H	2	A	103	5.03	5.73		5.71007	35.9	-0.7	3.3	8.4	9	8.6	41520.5	USB4000-VIS-RF52054	SHMSL	U1426A-2H-2A, 103.0cm		2
346	U1426	A	2	H	2	A	104	5.04	5.74		5.72007	36.4	-0.5	3.2	8.7	9.2	8.9	41520.5	USB4000-VIS-RF52054	SHMSL	U1426A-2H-2A, 104.0cm		2
346	U1426	A	2	H	2	A	105	5.05	5.75		5.73007	36.4	-0.5	3.3	8.7	9.2	8.9	41520.5	USB4000-VIS-RF52054	SHMSL	U1426A-2H-2A, 105.0cm		2
346	U1426	A	2	H	2	A	106	5.06	5.76		5.74007	35.8	-0.5	3.3	8.4	8.9	8.5	41520.5	USB4000-VIS-RF52054	SHMSL	U1426A-2H-2A, 106.0cm		2
346	U1426	A	2	H	2	A	107	5.07	5.77		5.75007	39	0.1	1.3	10.1	10.7	11	41520.5	USB4000-VIS-RF52054	SHMSL	U1426A-2H-2A, 107.0cm		2
346	U1426	A	2	H	2	A	108	5.08	5.78		5.76007	37	-0.3	2.7	9	9.5	9.3	41520.5	USB4000-VIS-RF52054	SHMSL	U1426A-2H-2A, 108.0cm		2
346	U1426	A	2	H	2	A	109	5.09	5.79		5.77007	36.5	-0.2	2.9	8.7	9.2	9	41520.5	USB4000-VIS-RF52054	SHMSL	U1426A-2H-2A, 109.0cm		2
346	U1426	A	2	H	2	A	110	5.1	5.8		5.78007	36.3	-0.2	2.9	8.7	9.2	9	41520.5	USB4000-VIS-RF52054	SHMSL	U1426A-2H-2A, 110.0cm		2
346	U1426	A	2	H	2	A	111	5.11	5.81		5.79007	34.9	-0.5	3.7	8	8.5	8	41520.5	USB4000-VIS-RF52054	SHMSL	U1426A-2H-2A, 111.0cm		2
346	U1426	A	2	H	2	A	112	5.12	5.82		5.80007	34.2	-0.4	4	7.7	8.1	7.6	41520.5	USB4000-VIS-RF52054	SHMSL	U1426A-2H-2A, 112.0cm		2
346	U1426	A	2	H	2	A	113	5.13	5.83		5.81007	35.7	-0.3	3.2	8.4	8.9	8.5	41520.5	USB4000-VIS-RF52054	SHMSL	U1426A-2H-2A, 113.0cm		2
346	U1426	A	2	H	2	A	114	5.14	5.84		5.82007	34.9	-0.3	3.5	8	8.5	8	41520.5	USB4000-VIS-RF52054	SHMSL	U1426A-2H-2A, 114.0cm		2
346	U1426	A	2	H	2	A	115	5.15	5.85		5.83007	33.4	0	3.1	7.3	7.7	7.4	41520.5	USB4000-VIS-RF52054	SHMSL	U1426A-2H-2A, 115.0cm		2
346	U1426	A	2	H	2	A	116	5.16	5.86		5.84007	31.7	0.1	4.2	6.6	6.9	6.4	41520.5	USB4000-VIS-RF52054	SHMSL	U1426A-2H-2A, 116.0cm		2
346	U1426	A	2	H	2	A	117	5.17	5.87		5.85007	30.8	0	4.6	6.2	6.6	5.9	41520.5	USB4000-VIS-RF52054	SHMSL	U1426A-2H-2A, 117.0cm		2
346	U1426	A	2	H	2	A	118	5.18	5.88		5.86007	30.4	0.3	5	6.1	6.4	5.7	41520.5	USB4000-VIS-RF52054	SHMSL	U1426A-2H-2A, 118.0cm		2
346	U1426	A	2	H	2	A	119	5.19	5.89		5.87007	29.9	0.3	5.3	5.9	6.2	5.4	41520.5	USB4000-VIS-RF52054	SHMSL	U1426A-2H-2A, 119.0cm		2
346	U1426	A	2	H	2	A	120	5.2	5.9		5.88007	31.3	0.5	4.3	6.5	6.8	6.2	41520.5	USB4000-VIS-RF52054	SHMSL	U1426A-2H-2A, 120.0cm		2
346	U1426	A	2	H	2	A	121	5.21	5.91		5.89007	30.1	0.5	4.7	6	6.3	5.6	41520.5	USB4000-VIS-RF52054	SHMSL	U1426A-2H-2A, 121.0cm		2
346	U1426	A	2	H	2	A	122	5.22	5.92		5.90007	30	0.1	5.2	5.9	6.2	5.5	41520.5	USB4000-VIS-RF52054	SHMSL	U1426A-2H-2A, 122.0cm		2
346	U1426	A	2	H	2	A	123	5.23	5.93		5.91007	31	0.3	4.5	6.3	6.7	6	41520.5	USB4000-VIS-RF52054	SHMSL	U1426A-2H-2A, 123.0cm		2
346	U1426	A	2	H	2	A	124	5.24	5.94		5.92007	30.4	0.2	4.4	6.1	6.4	5.8	41520.5	USB4000-VIS-RF52054	SHMSL	U1426A-2H-2A, 124.0cm		2
346	U1426	A	2	H	2	A	125	5.25	5.95		5.93007	32.1	0.1	3.9	6.8	7.1	6.6	41520.5	USB4000-VIS-RF52054	SHMSL	U1426A-2H-2A, 125.0cm		2
346	U1426	A	2	H	2	A	126	5.26	5.96		5.94007	31.5	-0.1	5.1	6.5	6.9	6.1	41520.5	USB4000-VIS-RF52054	SHMSL	U1426A-2H-2A, 126.0cm		2
346	U1426	A	2	H	2	A	127	5.27	5.97		5.95007	32.1	0.1	4.9	6.8	7.1	6.4	41520.5	USB4000-VIS-RF52054	SHMSL	U1426A-2H-2A, 127.0cm		2
346	U1426	A	2	H	2	A	128	5.28	5.98		5.96007	32.7	0.2	4.6	7.1	7.4	6.7	41520.5	USB4000-VIS-RF52054	SHMSL	U1426A-2H-2A, 128.0cm		2
346	U1426	A	2	H	2	A	129	5.29	5.99		5.97007	31.6	0.2	4.8	6.6	6.9	6.2	41520.5	USB4000-VIS-RF52054	SHMSL	U1426A-2H-2A, 129.0cm		2
346	U1426	A	2	H	2	A	130	5.3	6		5.98007	31.7	0.3	4.8	6.6	6.9	6.2	41520.5	USB4000-VIS-RF52054	SHMSL	U1426A-2H-2A, 130.0cm		2
346	U1426	A	2	H	2	A	131	5.31	6.01		5.99007	30.4	0.4	4.9	6.1	6.4	5.7	41520.5	USB4000-VIS-RF52054	SHMSL	U1426A-2H-2A, 131.0cm		2
346	U1426	A	2	H	2	A	132	5.32	6.02		6.00007	30.6	0.7	5.2	6.2	6.5	5.7	41520.5	USB4000-VIS-RF52054	SHMSL	U1426A-2H-2A, 132.0cm		2
346	U1426	A	2	H	2	A	133	5.33	6.03		6.01007	30.1	0.5	6.1	6	6.3	5.3	41520.5	USB4000-VIS-RF52054	SHMSL	U1426A-2H-2A, 133.0cm		2
346	U1426	A	2	H	2	A	134	5.34	6.04		6.02007	28.4	0.1	7.3	5.3	5.6	4.5	41520.5	USB4000-VIS-RF52054	SHMSL	U1426A-2H-2A, 134.0cm		2
346	U1426	A	2	H	2	A	135	5.35	6.05		6.03007	28.7	0.3	6.7	5.5	5.7	4.7	41520.5	USB4000-VIS-RF52054	SHMSL	U1426A-2H-2A, 135.0cm		2
346	U1426	A	2	H	2	A	136	5.36	6.06		6.04007	29.2	0.5	6.7	5.6	5.9	4.8	41520.5	USB4000-VIS-RF52054	SHMSL	U1426A-2H-2A, 136.0cm		2
346	U1426	A	2	H	2	A	137	5.37	6.07		6.05007	28.5	0.1	7.5	5.3	5.6	4.4	41520.5	USB4000-VIS-RF52054	SHMSL	U1426A-2H-2A, 137.0cm		2
346	U1426	A	2	H	2	A	138	5.38	6.08		6.06007	28.6	0.1	8.1	5.4	5.7	4.4	41520.5	USB4000-VIS-RF52054	SHMSL	U1426A-2H-2A, 138.0cm		2
346	U1426	A	2	H	2	A	139	5.39	6.09		6.07007	28.1	0.3	7.8	5.2	5.5	4.3	41520.5	USB4000-VIS-RF52054	SHMSL	U1426A-2H-2A, 139.0cm		2
346	U1426	A	2	H	2	A	140	5.4	6.1		6.08007	29.2	0.1	8.9	5.6	5.9	4.4	41520.5	USB4000-VIS-RF52054	SHMSL	U1426A-2H-2A, 140.0cm		2
346	U1426	A	2	H	2	A	141	5.41	6.11		6.09007	29.3	0.1	8.8	5.6	5.9	4.5	41520.5	USB4000-VIS-RF52054	SHMSL	U1426A-2H-2A, 141.0cm		2
346	U1426	A	2	H	2	A	142	5.42	6.12		6.10007	28.6	0	8.8	5.4	5.7	4.2	41520.5	USB4000-VIS-RF52054	SHMSL	U1426A-2H-2A, 142.0cm		2
346	U1426	A	2	H	2	A	143	5.43	6.13		6.11007	28.7	0.3	7.8	5.5	5.7	4.5	41520.5	USB4000-VIS-RF52054	SHMSL	U1426A-2H-2A, 143.0cm		2
346	U1426	A	2	H	2	A	144	5.44	6.14		6.12007	28.7	0	8.1	5.4	5.7	4.4	41520.5	USB4000-VIS-RF52054	SHMSL	U1426A-2H-2A, 144.0cm		2
346	U1426	A	2	H	2	A	145	5.45	6.15		6.13007	29.1	0	8.8	5.6	5.9	4.4	41520.5	USB4000-VIS-RF52054	SHMSL	U1426A-2H-2A, 145.0cm		2
346	U1426	A	2	H	2	A	146	5.46	6.16		6.14007	27.8	0.3	8.6	5.1	5.4	4	41520.5	USB4000-VIS-RF52054	SHMSL	U1426A-2H-2A, 146.0cm		2
346	U1426	A	2	H	2	A	147	5.47	6.17		6.15007	29	0.4	8.3	5.6	5.8	4.4	41520.5	USB4000-VIS-RF52054	SHMSL	U1426A-2H-2A, 147.0cm		2
346	U1426	A	2	H	2	A	148	5.48	6.18		6.16007	28.4	0.3	5.1	5.4	5.6	4.9	41520.5	USB4000-VIS-RF52054	SHMSL	U1426A-2H-2A, 148.0cm		2
346	U1426	A	2	H	2	A	149	5.49	6.19		6.17007	23.4	-0.1	6.4	3.7	3.9	3.1	41520.5	USB4000-VIS-RF52054	SHMSL	U1426A-2H-2A, 149.0cm		2
346	U1426	A	2	H	3	A	2	5.52	6.22		6.20007	28.1	0.4	5.8	5.3	5.5	4.7	41520.5	USB4000-VIS-RF52054	SHMSL	U1426A-2H-3A, 2.0cm		2
346	U1426	A	2	H	3	A	3	5.53	6.23		6.21007	27	0.6	6.5	4.9	5.1	4.1	41520.5	USB4000-VIS-RF52054	SHMSL	U1426A-2H-3A, 3.0cm		2
346	U1426	A	2	H	3	A	4	5.54	6.24		6.22007	26.8	0.3	7.2	4.8	5	4	41520.5	USB4000-VIS-RF52054	SHMSL	U1426A-2H-3A, 4.0cm		2
346	U1426	A	2	H	3	A	5	5.55	6.25		6.23007	25.6	0.5	7.1	4.4	4.6	3.6	41520.5	USB4000-VIS-RF52054	SHMSL	U1426A-2H-3A, 5.0cm		2
346	U1426	A	2	H	3	A	6	5.56	6.26		6.24007	27.3	0.5	6.2	5	5.2	4.3	41520.5	USB4000-VIS-RF52054	SHMSL	U1426A-2H-3A, 6.0cm		2
346	U1426	A	2	H	3	A	7	5.57	6.27		6.25007	26.3	0.4	6.8	4.6	4.8	3.9	41520.5	USB4000-VIS-RF52054	SHMSL	U1426A-2H-3A, 7.0cm		2
346	U1426	A	2	H	3	A	8	5.58	6.28		6.26007	26.6	0.4	7.5	4.7	5	3.9	41520.5	USB4000-VIS-RF52054	SHMSL	U1426A-2H-3A, 8.0cm		2
346	U1426	A	2	H	3	A	9	5.59	6.29		6.27007	26.4	0.2	6.7	4.7	4.9	3.9	41520.5	USB4000-VIS-RF52054	SHMSL	U1426A-2H-3A, 9.0cm		2
346	U1426	A	2	H	3	A	10	5.6	6.3		6.28007	26.4	0.4	6.9	4.7	4.9	3.9	41520.5	USB4000-VIS-RF52054	SHMSL	U1426A-2H-3A, 10.0cm		2
346	U1426	A	2	H	3	A	11	5.61	6.31		6.29007	26.1	0.4	6.3	4.6	4.8	3.9	41520.5	USB4000-VIS-RF52054	SHMSL	U1426A-2H-3A, 11.0cm		2
346	U1426	A	2	H	3	A	12	5.62	6.32		6.30007	26.2	0.3	6.4	4.6	4.8	3.9	41520.5	USB4000-VIS-RF52054	SHMSL	U1426A-2H-3A, 12.0cm		2
346	U1426	A	2	H	3	A	13	5.63	6.33		6.31007	26.7	0.4	7	4.7	5	4	41520.5	USB4000-VIS-RF52054	SHMSL	U1426A-2H-3A, 13.0cm		2
346	U1426	A	2	H	3	A	14	5.64	6.34		6.32007	28.1	0.5	5.8	5.2	5.5	4.6	41520.5	USB4000-VIS-RF52054	SHMSL	U1426A-2H-3A, 14.0cm		2
346	U1426	A	2	H	3	A	15	5.65	6.35		6.33007	28.3	0.5	5.4	5.3	5.6	4.8	41520.5	USB4000-VIS-RF52054	SHMSL	U1426A-2H-3A, 15.0cm		2
346	U1426	A	2	H	3	A	16	5.66	6.36		6.34007	27	0.3	6.1	4.8	5.1	4.2	41520.5	USB4000-VIS-RF52054	SHMSL	U1426A-2H-3A, 16.0cm		2
346	U1426	A	2	H	3	A	17	5.67	6.37		6.35007	27.1	0.5	5.3	4.9	5.1	4.4	41520.5	USB4000-VIS-RF52054	SHMSL	U1426A-2H-3A, 17.0cm		2
346	U1426	A	2	H	3	A	18	5.68	6.38		6.36007	26	0.3	6.1	4.5	4.7	3.9	41520.5	USB4000-VIS-RF52054	SHMSL	U1426A-2H-3A, 18.0cm		2
346	U1426	A	2	H	3	A	19	5.69	6.39		6.37007	26.8	0.4	5.7	4.8	5	4.3	41520.5	USB4000-VIS-RF52054	SHMSL	U1426A-2H-3A, 19.0cm		2
346	U1426	A	2	H	3	A	20	5.7	6.4		6.38007	27.6	0.3	6.3	5.1	5.3	4.4	41520.5	USB4000-VIS-RF52054	SHMSL	U1426A-2H-3A, 20.0cm		2
346	U1426	A	2	H	3	A	21	5.71	6.41		6.39007	27.1	0.5	5.9	4.9	5.1	4.3	41520.5	USB4000-VIS-RF52054	SHMSL	U1426A-2H-3A, 21.0cm		2
346	U1426	A	2	H	3	A	22	5.72	6.42		6.40007	27.8	0.6	4.8	5.2	5.4	4.7	41520.5	USB4000-VIS-RF52054	SHMSL	U1426A-2H-3A, 22.0cm		2
346	U1426	A	2	H	3	A	23	5.73	6.43		6.41007	27.1	0.5	6.8	4.9	5.1	4.2	41520.5	USB4000-VIS-RF52054	SHMSL	U1426A-2H-3A, 23.0cm		2
346	U1426	A	2	H	3	A	24	5.74	6.44		6.42007	27.3	0.2	8.7	4.9	5.2	3.8	41520.5	USB4000-VIS-RF52054	SHMSL	U1426A-2H-3A, 24.0cm		2
346	U1426	A	2	H	3	A	25	5.75	6.45		6.43007	27.8	0.1	7	5.1	5.4	4.3	41520.5	USB4000-VIS-RF52054	SHMSL	U1426A-2H-3A, 25.0cm		2
346	U1426	A	2	H	3	A	26	5.76	6.46		6.44007	30.1	-0.5	6.2	5.9	6.3	5.3	41520.5	USB4000-VIS-RF52054	SHMSL	U1426A-2H-3A, 26.0cm		2
346	U1426	A	2	H	3	A	27	5.77	6.47		6.45007	31.9	-0.5	5.9	6.6	7	6	41520.5	USB4000-VIS-RF52054	SHMSL	U1426A-2H-3A, 27.0cm		2
346	U1426	A	2	H	3	A	28	5.78	6.48		6.46007	31.2	-0.5	6.7	6.3	6.7	5.6	41520.5	USB4000-VIS-RF52054	SHMSL	U1426A-2H-3A, 28.0cm		2
346	U1426	A	2	H	3	A	29	5.79	6.49		6.47007	30.8	-0.5	6.2	6.2	6.6	5.5	41520.5	USB4000-VIS-RF52054	SHMSL	U1426A-2H-3A, 29.0cm		2
346	U1426	A	2	H	3	A	30	5.8	6.5		6.48007	29.9	-0.5	6.4	5.8	6.2	5.1	41520.5	USB4000-VIS-RF52054	SHMSL	U1426A-2H-3A, 30.0cm		2
346	U1426	A	2	H	3	A	31	5.81	6.51		6.49007	29.5	-0.3	6.6	5.7	6	5	41520.5	USB4000-VIS-RF52054	SHMSL	U1426A-2H-3A, 31.0cm		2
346	U1426	A	2	H	3	A	32	5.82	6.52		6.50007	30.3	-0.4	6.5	6	6.4	5.3	41520.5	USB4000-VIS-RF52054	SHMSL	U1426A-2H-3A, 32.0cm		2
346	U1426	A	2	H	3	A	33	5.83	6.53		6.51007	32.3	-0.3	5.9	6.8	7.2	6.2	41520.5	USB4000-VIS-RF52054	SHMSL	U1426A-2H-3A, 33.0cm		2
346	U1426	A	2	H	3	A	34	5.84	6.54		6.52007	31.7	-0.6	6.8	6.6	7	5.8	41520.5	USB4000-VIS-RF52054	SHMSL	U1426A-2H-3A, 34.0cm		2
346	U1426	A	2	H	3	A	35	5.85	6.55		6.53007	31.4	-0.4	6.9	6.4	6.8	5.6	41520.5	USB4000-VIS-RF52054	SHMSL	U1426A-2H-3A, 35.0cm		2
346	U1426	A	2	H	3	A	36	5.86	6.56		6.54007	32.3	-0.5	7.2	6.8	7.2	5.9	41520.5	USB4000-VIS-RF52054	SHMSL	U1426A-2H-3A, 36.0cm		2
346	U1426	A	2	H	3	A	37	5.87	6.57		6.55007	33.1	-0.6	7.3	7.1	7.6	6.2	41520.5	USB4000-VIS-RF52054	SHMSL	U1426A-2H-3A, 37.0cm		2
346	U1426	A	2	H	3	A	38	5.88	6.58		6.56007	32.3	-0.5	7.2	6.8	7.2	5.9	41520.5	USB4000-VIS-RF52054	SHMSL	U1426A-2H-3A, 38.0cm		2
346	U1426	A	2	H	3	A	39	5.89	6.59		6.57007	31.6	-0.3	7.5	6.5	6.9	5.5	41520.5	USB4000-VIS-RF52054	SHMSL	U1426A-2H-3A, 39.0cm		2
346	U1426	A	2	H	3	A	40	5.9	6.6		6.58007	30.5	0	8.2	6.1	6.4	5	41520.5	USB4000-VIS-RF52054	SHMSL	U1426A-2H-3A, 40.0cm		2
346	U1426	A	2	H	3	A	41	5.91	6.61		6.59007	29.9	0.2	8.3	5.9	6.2	4.8	41520.5	USB4000-VIS-RF52054	SHMSL	U1426A-2H-3A, 41.0cm		2
346	U1426	A	2	H	3	A	42	5.92	6.62		6.60007	31.8	-0.1	7.8	6.6	7	5.6	41520.5	USB4000-VIS-RF52054	SHMSL	U1426A-2H-3A, 42.0cm		2
346	U1426	A	2	H	3	A	43	5.93	6.63		6.61007	34.3	-0.3	6.4	7.7	8.2	7	41520.5	USB4000-VIS-RF52054	SHMSL	U1426A-2H-3A, 43.0cm		2
346	U1426	A	2	H	3	A	44	5.94	6.64		6.62007	33.5	-0.5	6.5	7.3	7.8	6.6	41520.5	USB4000-VIS-RF52054	SHMSL	U1426A-2H-3A, 44.0cm		2
346	U1426	A	2	H	3	A	45	5.95	6.65		6.63007	33	-0.6	6.4	7.1	7.5	6.4	41520.5	USB4000-VIS-RF52054	SHMSL	U1426A-2H-3A, 45.0cm		2
346	U1426	A	2	H	3	A	46	5.96	6.66		6.64007	33.6	-0.4	5.8	7.4	7.8	6.8	41520.5	USB4000-VIS-RF52054	SHMSL	U1426A-2H-3A, 46.0cm		2
346	U1426	A	2	H	3	A	47	5.97	6.67		6.65007	32.3	-0.5	5.8	6.8	7.2	6.3	41520.5	USB4000-VIS-RF52054	SHMSL	U1426A-2H-3A, 47.0cm		2
346	U1426	A	2	H	3	A	48	5.98	6.68		6.66007	31.9	-0.5	5.2	6.6	7.1	6.2	41520.5	USB4000-VIS-RF52054	SHMSL	U1426A-2H-3A, 48.0cm		2
346	U1426	A	2	H	3	A	49	5.99	6.69		6.67007	33.8	-0.3	4.6	7.5	7.9	7.2	41520.5	USB4000-VIS-RF52054	SHMSL	U1426A-2H-3A, 49.0cm		2
346	U1426	A	2	H	3	A	50	6	6.7		6.68007	32.1	-0.1	5.2	6.7	7.1	6.3	41520.5	USB4000-VIS-RF52054	SHMSL	U1426A-2H-3A, 50.0cm		2
346	U1426	A	2	H	3	A	51	6.01	6.71		6.69007	28.8	-0.1	6.5	5.5	5.8	4.8	41520.5	USB4000-VIS-RF52054	SHMSL	U1426A-2H-3A, 51.0cm		2
346	U1426	A	2	H	3	A	52	6.02	6.72		6.70007	28.5	-0.2	7.5	5.3	5.6	4.5	41520.5	USB4000-VIS-RF52054	SHMSL	U1426A-2H-3A, 52.0cm		2
346	U1426	A	2	H	3	A	53	6.03	6.73		6.71007	27.8	0	8	5.1	5.4	4.1	41520.5	USB4000-VIS-RF52054	SHMSL	U1426A-2H-3A, 53.0cm		2
346	U1426	A	2	H	3	A	54	6.04	6.74		6.72007	27	0.3	8	4.9	5.1	3.9	41520.5	USB4000-VIS-RF52054	SHMSL	U1426A-2H-3A, 54.0cm		2
346	U1426	A	2	H	3	A	55	6.05	6.75		6.73007	27.2	0.1	7.3	4.9	5.2	4.1	41520.5	USB4000-VIS-RF52054	SHMSL	U1426A-2H-3A, 55.0cm		2
346	U1426	A	2	H	3	A	56	6.06	6.76		6.74007	28.6	0.1	7.1	5.4	5.7	4.6	41520.5	USB4000-VIS-RF52054	SHMSL	U1426A-2H-3A, 56.0cm		2
346	U1426	A	2	H	3	A	57	6.07	6.77		6.75007	28.6	0	7	5.4	5.7	4.6	41520.5	USB4000-VIS-RF52054	SHMSL	U1426A-2H-3A, 57.0cm		2
346	U1426	A	2	H	3	A	58	6.08	6.78		6.76007	26.6	0.3	7.8	4.7	5	3.8	41520.5	USB4000-VIS-RF52054	SHMSL	U1426A-2H-3A, 58.0cm		2
346	U1426	A	2	H	3	A	59	6.09	6.79		6.77007	27.9	0.5	5.4	5.2	5.4	4.7	41520.5	USB4000-VIS-RF52054	SHMSL	U1426A-2H-3A, 59.0cm		2
346	U1426	A	2	H	3	A	60	6.1	6.8		6.78007	24.6	0.3	4.6	4.1	4.3	3.8	41520.5	USB4000-VIS-RF52054	SHMSL	U1426A-2H-3A, 60.0cm		2
346	U1426	A	2	H	3	A	61	6.11	6.81		6.79007	27	0.1	6.6	4.8	5.1	4.1	41520.5	USB4000-VIS-RF52054	SHMSL	U1426A-2H-3A, 61.0cm		2
346	U1426	A	2	H	3	A	62	6.12	6.82		6.80007	27.6	0.2	6.5	5.1	5.3	4.3	41520.5	USB4000-VIS-RF52054	SHMSL	U1426A-2H-3A, 62.0cm		2
346	U1426	A	2	H	3	A	63	6.13	6.83		6.81007	29	0.6	5.6	5.6	5.8	5	41520.5	USB4000-VIS-RF52054	SHMSL	U1426A-2H-3A, 63.0cm		2
346	U1426	A	2	H	3	A	64	6.14	6.84		6.82007	28	0.6	6.6	5.2	5.4	4.4	41520.5	USB4000-VIS-RF52054	SHMSL	U1426A-2H-3A, 64.0cm		2
346	U1426	A	2	H	3	A	65	6.15	6.85		6.83007	28.2	0.9	5.6	5.3	5.5	4.7	41520.5	USB4000-VIS-RF52054	SHMSL	U1426A-2H-3A, 65.0cm		2
346	U1426	A	2	H	3	A	66	6.16	6.86		6.84007	27.3	0.3	6.2	5	5.2	4.3	41520.5	USB4000-VIS-RF52054	SHMSL	U1426A-2H-3A, 66.0cm		2
346	U1426	A	2	H	3	A	67	6.17	6.87		6.85007	29	0	5.1	5.5	5.8	5.1	41520.5	USB4000-VIS-RF52054	SHMSL	U1426A-2H-3A, 67.0cm		2
346	U1426	A	2	H	3	A	68	6.18	6.88		6.86007	30.5	-0.2	4.4	6.1	6.5	5.8	41520.5	USB4000-VIS-RF52054	SHMSL	U1426A-2H-3A, 68.0cm		2
346	U1426	A	2	H	3	A	69	6.19	6.89		6.87007	31.7	-0.1	4.3	6.6	7	6.4	41520.5	USB4000-VIS-RF52054	SHMSL	U1426A-2H-3A, 69.0cm		2
346	U1426	A	2	H	3	A	70	6.2	6.9		6.88007	31.8	-0.1	4.3	6.6	7	6.4	41520.5	USB4000-VIS-RF52054	SHMSL	U1426A-2H-3A, 70.0cm		2
346	U1426	A	2	H	3	A	71	6.21	6.91		6.89007	31.1	-0.1	4.4	6.3	6.7	6.1	41520.5	USB4000-VIS-RF52054	SHMSL	U1426A-2H-3A, 71.0cm		2
346	U1426	A	2	H	3	A	72	6.22	6.92		6.90007	31.4	0	4.4	6.5	6.8	6.2	41520.5	USB4000-VIS-RF52054	SHMSL	U1426A-2H-3A, 72.0cm		2
346	U1426	A	2	H	3	A	73	6.23	6.93		6.91007	31.5	0	4.2	6.5	6.9	6.3	41520.5	USB4000-VIS-RF52054	SHMSL	U1426A-2H-3A, 73.0cm		2
346	U1426	A	2	H	3	A	74	6.24	6.94		6.92007	32.5	0	3.5	6.9	7.3	6.9	41520.5	USB4000-VIS-RF52054	SHMSL	U1426A-2H-3A, 74.0cm		2
346	U1426	A	2	H	3	A	75	6.25	6.95		6.93007	33.8	0.2	3.1	7.5	7.9	7.6	41520.5	USB4000-VIS-RF52054	SHMSL	U1426A-2H-3A, 75.0cm		2
346	U1426	A	2	H	3	A	76	6.26	6.96		6.94007	36.1	0.4	2.3	8.7	9.1	9	41520.5	USB4000-VIS-RF52054	SHMSL	U1426A-2H-3A, 76.0cm		2
346	U1426	A	2	H	3	A	77	6.27	6.97		6.95007	32.3	0.1	4.1	6.9	7.2	6.7	41520.5	USB4000-VIS-RF52054	SHMSL	U1426A-2H-3A, 77.0cm		2
346	U1426	A	2	H	3	A	78	6.28	6.98		6.96007	37.9	0.8	0.8	9.6	10	10.5	41520.5	USB4000-VIS-RF52054	SHMSL	U1426A-2H-3A, 78.0cm		2
346	U1426	A	2	H	3	A	79	6.29	6.99		6.97007	40.3	1.2	-0.7	11	11.5	12.6	41520.5	USB4000-VIS-RF52054	SHMSL	U1426A-2H-3A, 79.0cm		2
346	U1426	A	2	H	3	A	80	6.3	7		6.98007	39.7	1	-0.5	10.6	11	12.1	41520.5	USB4000-VIS-RF52054	SHMSL	U1426A-2H-3A, 80.0cm		2
346	U1426	A	2	H	3	A	81	6.31	7.01		6.99007	41	0.8	-0.1	11.3	11.8	12.8	41520.5	USB4000-VIS-RF52054	SHMSL	U1426A-2H-3A, 81.0cm		2
346	U1426	A	2	H	3	A	82	6.32	7.02		7.00007	41.1	0.6	0.5	11.4	11.9	12.6	41520.5	USB4000-VIS-RF52054	SHMSL	U1426A-2H-3A, 82.0cm		2
346	U1426	A	2	H	3	A	83	6.33	7.03		7.01007	34.8	-0.4	3.7	7.9	8.4	7.9	41520.5	USB4000-VIS-RF52054	SHMSL	U1426A-2H-3A, 83.0cm		2
346	U1426	A	2	H	3	A	84	6.34	7.04		7.02007	35.6	-0.3	3.4	8.3	8.8	8.4	41520.5	USB4000-VIS-RF52054	SHMSL	U1426A-2H-3A, 84.0cm		2
346	U1426	A	2	H	3	A	85	6.35	7.05		7.03007	33.1	-0.5	4	7.2	7.6	7.1	41520.5	USB4000-VIS-RF52054	SHMSL	U1426A-2H-3A, 85.0cm		2
346	U1426	A	2	H	3	A	86	6.36	7.06		7.04007	35.1	-0.4	4.2	8.1	8.6	7.9	41520.5	USB4000-VIS-RF52054	SHMSL	U1426A-2H-3A, 86.0cm		2
346	U1426	A	2	H	3	A	87	6.37	7.07		7.05007	35.2	-0.6	4.5	8.1	8.6	7.9	41520.5	USB4000-VIS-RF52054	SHMSL	U1426A-2H-3A, 87.0cm		2
346	U1426	A	2	H	3	A	88	6.38	7.08		7.06007	34.7	-0.6	5	7.8	8.3	7.5	41520.5	USB4000-VIS-RF52054	SHMSL	U1426A-2H-3A, 88.0cm		2
346	U1426	A	2	H	3	A	89	6.39	7.09		7.07007	33.8	-0.7	5.1	7.4	7.9	7.1	41520.5	USB4000-VIS-RF52054	SHMSL	U1426A-2H-3A, 89.0cm		2
346	U1426	A	2	H	3	A	90	6.4	7.1		7.08007	33.2	-0.7	4.9	7.2	7.6	6.9	41520.5	USB4000-VIS-RF52054	SHMSL	U1426A-2H-3A, 90.0cm		2
346	U1426	A	2	H	3	A	91	6.41	7.11		7.09007	33.6	-0.7	4.4	7.3	7.8	7.2	41520.5	USB4000-VIS-RF52054	SHMSL	U1426A-2H-3A, 91.0cm		2
346	U1426	A	2	H	3	A	92	6.42	7.12		7.10007	34.2	-0.8	4.9	7.6	8.1	7.3	41520.5	USB4000-VIS-RF52054	SHMSL	U1426A-2H-3A, 92.0cm		2
346	U1426	A	2	H	3	A	93	6.43	7.13		7.11007	34.8	-1	5.2	7.9	8.4	7.5	41520.5	USB4000-VIS-RF52054	SHMSL	U1426A-2H-3A, 93.0cm		2
346	U1426	A	2	H	3	A	94	6.44	7.14		7.12007	35.2	-0.9	5.3	8	8.6	7.7	41520.5	USB4000-VIS-RF52054	SHMSL	U1426A-2H-3A, 94.0cm		2
346	U1426	A	2	H	3	A	95	6.45	7.15		7.13007	35.6	-0.7	4.6	8.2	8.8	8	41520.5	USB4000-VIS-RF52054	SHMSL	U1426A-2H-3A, 95.0cm		2
346	U1426	A	2	H	3	A	96	6.46	7.16		7.14007	35	-0.8	4.9	8	8.5	7.7	41520.5	USB4000-VIS-RF52054	SHMSL	U1426A-2H-3A, 96.0cm		2
346	U1426	A	2	H	3	A	97	6.47	7.17		7.15007	34.7	-0.7	5.7	7.9	8.4	7.3	41520.5	USB4000-VIS-RF52054	SHMSL	U1426A-2H-3A, 97.0cm		2
346	U1426	A	2	H	3	A	98	6.48	7.18		7.16007	34	-0.7	6.2	7.5	8	6.9	41520.5	USB4000-VIS-RF52054	SHMSL	U1426A-2H-3A, 98.0cm		2
346	U1426	A	2	H	3	A	99	6.49	7.19		7.17007	34.6	-0.3	6.2	7.8	8.3	7.2	41520.5	USB4000-VIS-RF52054	SHMSL	U1426A-2H-3A, 99.0cm		2
346	U1426	A	2	H	3	A	100	6.5	7.2		7.18007	34.3	-0.6	5.2	7.7	8.2	7.3	41520.5	USB4000-VIS-RF52054	SHMSL	U1426A-2H-3A, 100.0cm		2
346	U1426	A	2	H	3	A	101	6.51	7.21		7.19007	38	-0.1	3	9.6	10.1	9.8	41520.5	USB4000-VIS-RF52054	SHMSL	U1426A-2H-3A, 101.0cm		2
346	U1426	A	2	H	3	A	102	6.52	7.22		7.20007	36.2	-0.8	4.2	8.6	9.1	8.5	41520.5	USB4000-VIS-RF52054	SHMSL	U1426A-2H-3A, 102.0cm		2
346	U1426	A	2	H	3	A	103	6.53	7.23		7.21007	36.2	-0.7	4.2	8.6	9.1	8.5	41520.5	USB4000-VIS-RF52054	SHMSL	U1426A-2H-3A, 103.0cm		2
346	U1426	A	2	H	3	A	104	6.54	7.24		7.22007	35.5	-1	4.7	8.2	8.7	8	41520.5	USB4000-VIS-RF52054	SHMSL	U1426A-2H-3A, 104.0cm		2
346	U1426	A	2	H	3	A	105	6.55	7.25		7.23007	35.4	-0.9	4.7	8.2	8.7	7.9	41520.5	USB4000-VIS-RF52054	SHMSL	U1426A-2H-3A, 105.0cm		2
346	U1426	A	2	H	3	A	106	6.56	7.26		7.24007	36.7	-1.2	3.8	8.8	9.4	8.9	41520.5	USB4000-VIS-RF52054	SHMSL	U1426A-2H-3A, 106.0cm		2
346	U1426	A	2	H	3	A	107	6.57	7.27		7.25007	37.4	-1.1	4.1	9.1	9.7	9.1	41520.5	USB4000-VIS-RF52054	SHMSL	U1426A-2H-3A, 107.0cm		2
346	U1426	A	2	H	3	A	108	6.58	7.28		7.26007	38.3	-0.9	3.3	9.6	10.3	9.9	41520.5	USB4000-VIS-RF52054	SHMSL	U1426A-2H-3A, 108.0cm		2
346	U1426	A	2	H	3	A	109	6.59	7.29		7.27007	37.8	-0.9	3.1	9.3	10	9.7	41520.5	USB4000-VIS-RF52054	SHMSL	U1426A-2H-3A, 109.0cm		2
346	U1426	A	2	H	3	A	110	6.6	7.3		7.28007	37.5	-0.9	2.6	9.2	9.8	9.6	41520.5	USB4000-VIS-RF52054	SHMSL	U1426A-2H-3A, 110.0cm		2
346	U1426	A	2	H	3	A	111	6.61	7.31		7.29007	37.9	-0.8	1.8	9.4	10.1	10.2	41520.5	USB4000-VIS-RF52054	SHMSL	U1426A-2H-3A, 111.0cm		2
346	U1426	A	2	H	3	A	112	6.62	7.32		7.30007	37.8	-1	2.4	9.3	10	9.9	41520.5	USB4000-VIS-RF52054	SHMSL	U1426A-2H-3A, 112.0cm		2
346	U1426	A	2	H	3	A	113	6.63	7.33		7.31007	37.5	-0.9	2.7	9.2	9.8	9.6	41520.5	USB4000-VIS-RF52054	SHMSL	U1426A-2H-3A, 113.0cm		2
346	U1426	A	2	H	3	A	114	6.64	7.34		7.32007	38.7	-0.9	2.8	9.8	10.5	10.3	41520.5	USB4000-VIS-RF52054	SHMSL	U1426A-2H-3A, 114.0cm		2
346	U1426	A	2	H	3	A	115	6.65	7.35		7.33007	40	-0.7	2.2	10.6	11.2	11.3	41520.5	USB4000-VIS-RF52054	SHMSL	U1426A-2H-3A, 115.0cm		2
346	U1426	A	2	H	3	A	116	6.66	7.36		7.34007	38.6	-0.9	2.5	9.8	10.4	10.3	41520.5	USB4000-VIS-RF52054	SHMSL	U1426A-2H-3A, 116.0cm		2
346	U1426	A	2	H	3	A	117	6.67	7.37		7.35007	38.8	-0.8	2.1	9.9	10.6	10.6	41520.5	USB4000-VIS-RF52054	SHMSL	U1426A-2H-3A, 117.0cm		2
346	U1426	A	2	H	3	A	118	6.68	7.38		7.36007	39.1	-0.6	2.6	10.1	10.7	10.6	41520.5	USB4000-VIS-RF52054	SHMSL	U1426A-2H-3A, 118.0cm		2
346	U1426	A	2	H	3	A	119	6.69	7.39		7.37007	38.5	-0.7	3.3	9.8	10.4	10	41520.5	USB4000-VIS-RF52054	SHMSL	U1426A-2H-3A, 119.0cm		2
346	U1426	A	2	H	3	A	120	6.7	7.4		7.38007	37.1	-0.9	3.9	9	9.6	9	41520.5	USB4000-VIS-RF52054	SHMSL	U1426A-2H-3A, 120.0cm		2
346	U1426	A	2	H	3	A	121	6.71	7.41		7.39007	38	-0.4	3.6	9.5	10.1	9.7	41520.5	USB4000-VIS-RF52054	SHMSL	U1426A-2H-3A, 121.0cm		2
346	U1426	A	2	H	3	A	122	6.72	7.42		7.40007	35.9	-0.7	4	8.4	8.9	8.4	41520.5	USB4000-VIS-RF52054	SHMSL	U1426A-2H-3A, 122.0cm		2
346	U1426	A	2	H	3	A	123	6.73	7.43		7.41007	36	-0.7	4	8.5	9	8.4	41520.5	USB4000-VIS-RF52054	SHMSL	U1426A-2H-3A, 123.0cm		2
346	U1426	A	2	H	3	A	124	6.74	7.44		7.42007	36.8	-0.6	3.6	8.8	9.4	8.9	41520.5	USB4000-VIS-RF52054	SHMSL	U1426A-2H-3A, 124.0cm		2
346	U1426	A	2	H	3	A	125	6.75	7.45		7.43007	35.8	-0.8	4.4	8.4	8.9	8.2	41520.5	USB4000-VIS-RF52054	SHMSL	U1426A-2H-3A, 125.0cm		2
346	U1426	A	2	H	3	A	126	6.76	7.46		7.44007	36.4	-0.6	3.9	8.7	9.2	8.7	41520.5	USB4000-VIS-RF52054	SHMSL	U1426A-2H-3A, 126.0cm		2
346	U1426	A	2	H	3	A	127	6.77	7.47		7.45007	35.2	-0.7	4.8	8.1	8.6	7.8	41520.5	USB4000-VIS-RF52054	SHMSL	U1426A-2H-3A, 127.0cm		2
346	U1426	A	2	H	3	A	128	6.78	7.48		7.46007	35.5	-0.8	4.9	8.2	8.7	7.9	41520.5	USB4000-VIS-RF52054	SHMSL	U1426A-2H-3A, 128.0cm		2
346	U1426	A	2	H	3	A	129	6.79	7.49		7.47007	34.5	-0.7	5.8	7.8	8.3	7.2	41520.5	USB4000-VIS-RF52054	SHMSL	U1426A-2H-3A, 129.0cm		2
346	U1426	A	2	H	3	A	130	6.8	7.5		7.48007	34.1	-0.4	5	7.6	8	7.2	41520.5	USB4000-VIS-RF52054	SHMSL	U1426A-2H-3A, 130.0cm		2
346	U1426	A	2	H	3	A	131	6.81	7.51		7.49007	33.4	-0.3	5.2	7.3	7.7	6.9	41520.5	USB4000-VIS-RF52054	SHMSL	U1426A-2H-3A, 131.0cm		2
346	U1426	A	2	H	3	A	132	6.82	7.52		7.50007	33.7	-0.5	4.9	7.4	7.9	7.1	41520.5	USB4000-VIS-RF52054	SHMSL	U1426A-2H-3A, 132.0cm		2
346	U1426	A	2	H	3	A	133	6.83	7.53		7.51007	37.1	-0.9	2.7	9	9.6	9.4	41520.5	USB4000-VIS-RF52054	SHMSL	U1426A-2H-3A, 133.0cm		2
346	U1426	A	2	H	3	A	134	6.84	7.54		7.52007	37.5	-0.9	2.7	9.2	9.8	9.6	41520.5	USB4000-VIS-RF52054	SHMSL	U1426A-2H-3A, 134.0cm		2
346	U1426	A	2	H	3	A	135	6.85	7.55		7.53007	36.8	-1	2.7	8.8	9.4	9.2	41520.5	USB4000-VIS-RF52054	SHMSL	U1426A-2H-3A, 135.0cm		2
346	U1426	A	2	H	3	A	136	6.86	7.56		7.54007	38.4	-0.9	2.5	9.7	10.3	10.2	41520.5	USB4000-VIS-RF52054	SHMSL	U1426A-2H-3A, 136.0cm		2
346	U1426	A	2	H	3	A	137	6.87	7.57		7.55007	36.9	-1.1	2.5	8.8	9.5	9.3	41520.5	USB4000-VIS-RF52054	SHMSL	U1426A-2H-3A, 137.0cm		2
346	U1426	A	2	H	3	A	138	6.88	7.58		7.56007	37.9	-1.1	2.6	9.4	10	9.9	41520.5	USB4000-VIS-RF52054	SHMSL	U1426A-2H-3A, 138.0cm		2
346	U1426	A	2	H	3	A	139	6.89	7.59		7.57007	37.5	-1.2	2.7	9.2	9.8	9.6	41520.5	USB4000-VIS-RF52054	SHMSL	U1426A-2H-3A, 139.0cm		2
346	U1426	A	2	H	3	A	140	6.9	7.6		7.58007	38.5	-1.1	2.7	9.7	10.4	10.2	41520.5	USB4000-VIS-RF52054	SHMSL	U1426A-2H-3A, 140.0cm		2
346	U1426	A	2	H	3	A	141	6.91	7.61		7.59007	39.2	-1	2.2	10.1	10.8	10.8	41520.5	USB4000-VIS-RF52054	SHMSL	U1426A-2H-3A, 141.0cm		2
346	U1426	A	2	H	3	A	142	6.92	7.62		7.60007	39.4	-1	2.3	10.2	10.9	10.9	41520.5	USB4000-VIS-RF52054	SHMSL	U1426A-2H-3A, 142.0cm		2
346	U1426	A	2	H	3	A	143	6.93	7.63		7.61007	38.3	-1	3.1	9.6	10.3	10	41520.5	USB4000-VIS-RF52054	SHMSL	U1426A-2H-3A, 143.0cm		2
346	U1426	A	2	H	3	A	144	6.94	7.64		7.62007	38.8	-1.1	2.9	9.8	10.5	10.3	41520.5	USB4000-VIS-RF52054	SHMSL	U1426A-2H-3A, 144.0cm		2
346	U1426	A	2	H	3	A	145	6.95	7.65		7.63007	38.1	-1.2	3.6	9.5	10.2	9.7	41520.5	USB4000-VIS-RF52054	SHMSL	U1426A-2H-3A, 145.0cm		2
346	U1426	A	2	H	3	A	146	6.96	7.66		7.64007	39	-1	3.2	10	10.7	10.3	41520.5	USB4000-VIS-RF52054	SHMSL	U1426A-2H-3A, 146.0cm		2
346	U1426	A	2	H	3	A	147	6.97	7.67		7.65007	39.3	-0.9	3	10.2	10.9	10.6	41520.5	USB4000-VIS-RF52054	SHMSL	U1426A-2H-3A, 147.0cm		2
346	U1426	A	2	H	3	A	148	6.98	7.68		7.66007	38.9	-0.7	2.2	9.9	10.6	10.6	41520.5	USB4000-VIS-RF52054	SHMSL	U1426A-2H-3A, 148.0cm		2
346	U1426	A	2	H	3	A	149	6.99	7.69		7.67007	39.3	-0.4	1.4	10.2	10.8	11.1	41520.5	USB4000-VIS-RF52054	SHMSL	U1426A-2H-3A, 149.0cm		2
346	U1426	A	2	H	4	A	2	7.02	7.72		7.70007	35.5	-0.4	2.2	8.3	8.8	8.7	41520.5	USB4000-VIS-RF52054	SHMSL	U1426A-2H-4A, 2.0cm		2
346	U1426	A	2	H	4	A	3	7.03	7.73		7.71007	34	-0.6	2.5	7.5	8	7.9	41520.5	USB4000-VIS-RF52054	SHMSL	U1426A-2H-4A, 3.0cm		2
346	U1426	A	2	H	4	A	4	7.04	7.74		7.72007	35.3	-1	3.5	8.1	8.7	8.2	41520.5	USB4000-VIS-RF52054	SHMSL	U1426A-2H-4A, 4.0cm		2
346	U1426	A	2	H	4	A	5	7.05	7.75		7.73007	36.1	-1	3.6	8.5	9.1	8.6	41520.5	USB4000-VIS-RF52054	SHMSL	U1426A-2H-4A, 5.0cm		2
346	U1426	A	2	H	4	A	6	7.06	7.76		7.74007	40.8	0	1.1	11.2	11.8	12.2	41520.5	USB4000-VIS-RF52054	SHMSL	U1426A-2H-4A, 6.0cm		2
346	U1426	A	2	H	4	A	7	7.07	7.77		7.75007	35.9	-0.9	3.9	8.4	9	8.4	41520.5	USB4000-VIS-RF52054	SHMSL	U1426A-2H-4A, 7.0cm		2
346	U1426	A	2	H	4	A	8	7.08	7.78		7.76007	37.8	-0.6	2.4	9.4	10	9.9	41520.5	USB4000-VIS-RF52054	SHMSL	U1426A-2H-4A, 8.0cm		2
346	U1426	A	2	H	4	A	9	7.09	7.79		7.77007	36.2	-0.9	3.5	8.6	9.1	8.7	41520.5	USB4000-VIS-RF52054	SHMSL	U1426A-2H-4A, 9.0cm		2
346	U1426	A	2	H	4	A	10	7.1	7.8		7.78007	37.5	-0.8	2.9	9.2	9.8	9.6	41520.5	USB4000-VIS-RF52054	SHMSL	U1426A-2H-4A, 10.0cm		2
346	U1426	A	2	H	4	A	11	7.11	7.81		7.79007	36.4	-0.9	3.1	8.7	9.2	8.9	41520.5	USB4000-VIS-RF52054	SHMSL	U1426A-2H-4A, 11.0cm		2
346	U1426	A	2	H	4	A	12	7.12	7.82		7.80007	36.6	-1	3	8.8	9.3	9.1	41520.5	USB4000-VIS-RF52054	SHMSL	U1426A-2H-4A, 12.0cm		2
346	U1426	A	2	H	4	A	13	7.13	7.83		7.81007	36.4	-0.9	2.8	8.7	9.2	9	41520.5	USB4000-VIS-RF52054	SHMSL	U1426A-2H-4A, 13.0cm		2
346	U1426	A	2	H	4	A	14	7.14	7.84		7.82007	38.3	-0.7	2.3	9.6	10.3	10.2	41520.5	USB4000-VIS-RF52054	SHMSL	U1426A-2H-4A, 14.0cm		2
346	U1426	A	2	H	4	A	15	7.15	7.85		7.83007	37.8	-0.9	2.8	9.3	10	9.7	41520.5	USB4000-VIS-RF52054	SHMSL	U1426A-2H-4A, 15.0cm		2
346	U1426	A	2	H	4	A	16	7.16	7.86		7.84007	38.8	-0.7	2.6	9.9	10.6	10.4	41520.5	USB4000-VIS-RF52054	SHMSL	U1426A-2H-4A, 16.0cm		2
346	U1426	A	2	H	4	A	17	7.17	7.87		7.85007	39.4	-0.8	2.6	10.2	10.9	10.8	41520.5	USB4000-VIS-RF52054	SHMSL	U1426A-2H-4A, 17.0cm		2
346	U1426	A	2	H	4	A	18	7.18	7.88		7.86007	39.6	-0.8	2.4	10.3	11	11	41520.5	USB4000-VIS-RF52054	SHMSL	U1426A-2H-4A, 18.0cm		2
346	U1426	A	2	H	4	A	19	7.19	7.89		7.87007	40	-0.8	2.3	10.6	11.3	11.2	41520.5	USB4000-VIS-RF52054	SHMSL	U1426A-2H-4A, 19.0cm		2
346	U1426	A	2	H	4	A	20	7.2	7.9		7.88007	40.3	-0.8	2.7	10.7	11.4	11.3	41520.5	USB4000-VIS-RF52054	SHMSL	U1426A-2H-4A, 20.0cm		2
346	U1426	A	2	H	4	A	21	7.21	7.91		7.89007	40.7	-0.9	2.6	10.9	11.7	11.5	41520.5	USB4000-VIS-RF52054	SHMSL	U1426A-2H-4A, 21.0cm		2
346	U1426	A	2	H	4	A	22	7.22	7.92		7.90007	40.9	-1	2.3	11	11.8	11.8	41520.5	USB4000-VIS-RF52054	SHMSL	U1426A-2H-4A, 22.0cm		2
346	U1426	A	2	H	4	A	23	7.23	7.93		7.91007	41.1	-1	2.5	11.2	12	11.9	41520.5	USB4000-VIS-RF52054	SHMSL	U1426A-2H-4A, 23.0cm		2
346	U1426	A	2	H	4	A	24	7.24	7.94		7.92007	40.9	-1	2.6	11.1	11.8	11.7	41520.5	USB4000-VIS-RF52054	SHMSL	U1426A-2H-4A, 24.0cm		2
346	U1426	A	2	H	4	A	25	7.25	7.95		7.93007	41	-1	2.6	11.1	11.9	11.7	41520.5	USB4000-VIS-RF52054	SHMSL	U1426A-2H-4A, 25.0cm		2
346	U1426	A	2	H	4	A	26	7.26	7.96		7.94007	40.8	-0.9	2.2	11	11.8	11.8	41520.5	USB4000-VIS-RF52054	SHMSL	U1426A-2H-4A, 26.0cm		2
346	U1426	A	2	H	4	A	27	7.27	7.97		7.95007	41	-1	2.6	11.1	11.8	11.7	41520.5	USB4000-VIS-RF52054	SHMSL	U1426A-2H-4A, 27.0cm		2
346	U1426	A	2	H	4	A	28	7.28	7.98		7.96007	41.3	-1	3.2	11.3	12	11.7	41520.5	USB4000-VIS-RF52054	SHMSL	U1426A-2H-4A, 28.0cm		2
346	U1426	A	2	H	4	A	29	7.29	7.99		7.97007	41.3	-0.8	2.9	11.3	12.1	11.8	41520.5	USB4000-VIS-RF52054	SHMSL	U1426A-2H-4A, 29.0cm		2
346	U1426	A	2	H	4	A	30	7.3	8		7.98007	41.5	-0.8	2.6	11.4	12.2	12.1	41520.5	USB4000-VIS-RF52054	SHMSL	U1426A-2H-4A, 30.0cm		2
346	U1426	A	2	H	4	A	31	7.31	8.01		7.99007	40.6	-0.9	3.6	10.9	11.6	11.2	41520.5	USB4000-VIS-RF52054	SHMSL	U1426A-2H-4A, 31.0cm		2
346	U1426	A	2	H	4	A	32	7.32	8.02		8.00007	39.9	-0.8	3	10.5	11.2	10.9	41520.5	USB4000-VIS-RF52054	SHMSL	U1426A-2H-4A, 32.0cm		2
346	U1426	A	2	H	4	A	33	7.33	8.03		8.01007	39.3	-1.1	3.9	10.1	10.8	10.3	41520.5	USB4000-VIS-RF52054	SHMSL	U1426A-2H-4A, 33.0cm		2
346	U1426	A	2	H	4	A	34	7.34	8.04		8.02007	41.1	-0.7	3.2	11.2	11.9	11.6	41520.5	USB4000-VIS-RF52054	SHMSL	U1426A-2H-4A, 34.0cm		2
346	U1426	A	2	H	4	A	35	7.35	8.05		8.03007	40.7	-0.8	3.5	11	11.7	11.2	41520.5	USB4000-VIS-RF52054	SHMSL	U1426A-2H-4A, 35.0cm		2
346	U1426	A	2	H	4	A	36	7.36	8.06		8.04007	40.6	-0.9	3.9	10.9	11.6	11	41520.5	USB4000-VIS-RF52054	SHMSL	U1426A-2H-4A, 36.0cm		2
346	U1426	A	2	H	4	A	37	7.37	8.07		8.05007	40.4	-0.8	3.5	10.8	11.5	11.1	41520.5	USB4000-VIS-RF52054	SHMSL	U1426A-2H-4A, 37.0cm		2
346	U1426	A	2	H	4	A	38	7.38	8.08		8.06007	43.2	0	1.3	12.6	13.3	13.7	41520.5	USB4000-VIS-RF52054	SHMSL	U1426A-2H-4A, 38.0cm		2
346	U1426	A	2	H	4	A	39	7.39	8.09		8.07007	37	-0.7	3.1	9	9.5	9.2	41520.5	USB4000-VIS-RF52054	SHMSL	U1426A-2H-4A, 39.0cm		2
346	U1426	A	2	H	4	A	40	7.4	8.1		8.08007	37	-0.4	2.2	9	9.5	9.5	41520.5	USB4000-VIS-RF52054	SHMSL	U1426A-2H-4A, 40.0cm		2
346	U1426	A	2	H	4	A	41	7.41	8.11		8.09007	36.7	-0.5	2.7	8.8	9.4	9.2	41520.5	USB4000-VIS-RF52054	SHMSL	U1426A-2H-4A, 41.0cm		2
346	U1426	A	2	H	4	A	42	7.42	8.12		8.10007	38.4	-0.2	1.5	9.7	10.3	10.5	41520.5	USB4000-VIS-RF52054	SHMSL	U1426A-2H-4A, 42.0cm		2
346	U1426	A	2	H	4	A	43	7.43	8.13		8.11007	37.6	-0.6	2.6	9.3	9.9	9.7	41520.5	USB4000-VIS-RF52054	SHMSL	U1426A-2H-4A, 43.0cm		2
346	U1426	A	2	H	4	A	44	7.44	8.14		8.12007	37.3	-0.6	2.5	9.1	9.7	9.6	41520.5	USB4000-VIS-RF52054	SHMSL	U1426A-2H-4A, 44.0cm		2
346	U1426	A	2	H	4	A	45	7.45	8.15		8.13007	36	-0.8	3.3	8.5	9	8.7	41520.5	USB4000-VIS-RF52054	SHMSL	U1426A-2H-4A, 45.0cm		2
346	U1426	A	2	H	4	A	46	7.46	8.16		8.14007	37.1	-0.9	2.6	9	9.6	9.5	41520.5	USB4000-VIS-RF52054	SHMSL	U1426A-2H-4A, 46.0cm		2
346	U1426	A	2	H	4	A	47	7.47	8.17		8.15007	36.6	-0.7	2.8	8.7	9.3	9.1	41520.5	USB4000-VIS-RF52054	SHMSL	U1426A-2H-4A, 47.0cm		2
346	U1426	A	2	H	4	A	48	7.48	8.18		8.16007	36.8	-0.6	2.8	8.9	9.4	9.2	41520.5	USB4000-VIS-RF52054	SHMSL	U1426A-2H-4A, 48.0cm		2
346	U1426	A	2	H	4	A	49	7.49	8.19		8.17007	38.3	-0.6	2.9	9.7	10.3	10	41520.5	USB4000-VIS-RF52054	SHMSL	U1426A-2H-4A, 49.0cm		2
346	U1426	A	2	H	4	A	50	7.5	8.2		8.18007	35.2	-0.5	3.9	8.1	8.6	8.1	41520.5	USB4000-VIS-RF52054	SHMSL	U1426A-2H-4A, 50.0cm		2
346	U1426	A	2	H	4	A	51	7.51	8.21		8.19007	35.9	-0.7	3.9	8.4	9	8.4	41520.5	USB4000-VIS-RF52054	SHMSL	U1426A-2H-4A, 51.0cm		2
346	U1426	A	2	H	4	A	52	7.52	8.22		8.20007	36.5	-0.8	3.5	8.7	9.3	8.8	41520.5	USB4000-VIS-RF52054	SHMSL	U1426A-2H-4A, 52.0cm		2
346	U1426	A	2	H	4	A	53	7.53	8.23		8.21007	36.5	-0.9	3.7	8.7	9.3	8.8	41520.5	USB4000-VIS-RF52054	SHMSL	U1426A-2H-4A, 53.0cm		2
346	U1426	A	2	H	4	A	54	7.54	8.24		8.22007	36	-0.8	4	8.5	9	8.5	41520.5	USB4000-VIS-RF52054	SHMSL	U1426A-2H-4A, 54.0cm		2
346	U1426	A	2	H	4	A	55	7.55	8.25		8.23007	36.2	-0.9	4	8.6	9.1	8.6	41520.5	USB4000-VIS-RF52054	SHMSL	U1426A-2H-4A, 55.0cm		2
346	U1426	A	2	H	4	A	56	7.56	8.26		8.24007	33.2	-0.4	5.8	7.2	7.6	6.6	41520.5	USB4000-VIS-RF52054	SHMSL	U1426A-2H-4A, 56.0cm		2
346	U1426	A	2	H	4	A	57	7.57	8.27		8.25007	32.3	-0.3	5.8	6.8	7.2	6.3	41520.5	USB4000-VIS-RF52054	SHMSL	U1426A-2H-4A, 57.0cm		2
346	U1426	A	2	H	4	A	58	7.58	8.28		8.26007	29.6	-0.2	6.6	5.7	6.1	5	41520.5	USB4000-VIS-RF52054	SHMSL	U1426A-2H-4A, 58.0cm		2
346	U1426	A	2	H	4	A	59	7.59	8.29		8.27007	29.2	0	6.7	5.6	5.9	4.9	41520.5	USB4000-VIS-RF52054	SHMSL	U1426A-2H-4A, 59.0cm		2
346	U1426	A	2	H	4	A	60	7.6	8.3		8.28007	30.1	-0.1	7	5.9	6.3	5.1	41520.5	USB4000-VIS-RF52054	SHMSL	U1426A-2H-4A, 60.0cm		2
346	U1426	A	2	H	4	A	61	7.61	8.31		8.29007	30.4	-0.1	7.5	6.1	6.4	5.1	41520.5	USB4000-VIS-RF52054	SHMSL	U1426A-2H-4A, 61.0cm		2
346	U1426	A	2	H	4	A	62	7.62	8.32		8.30007	29.7	0.2	6.9	5.8	6.1	5	41520.5	USB4000-VIS-RF52054	SHMSL	U1426A-2H-4A, 62.0cm		2
346	U1426	A	2	H	4	A	63	7.63	8.33		8.31007	31	0.5	6	6.4	6.7	5.7	41520.5	USB4000-VIS-RF52054	SHMSL	U1426A-2H-4A, 63.0cm		2
346	U1426	A	2	H	4	A	64	7.64	8.34		8.32007	29.1	0.4	6.9	5.6	5.9	4.8	41520.5	USB4000-VIS-RF52054	SHMSL	U1426A-2H-4A, 64.0cm		2
346	U1426	A	2	H	4	A	65	7.65	8.35		8.33007	30.4	0.4	7.8	6.1	6.4	5	41520.5	USB4000-VIS-RF52054	SHMSL	U1426A-2H-4A, 65.0cm		2
346	U1426	A	2	H	4	A	66	7.66	8.36		8.34007	32.4	0.5	6.8	7	7.3	6.1	41520.5	USB4000-VIS-RF52054	SHMSL	U1426A-2H-4A, 66.0cm		2
346	U1426	A	2	H	4	A	67	7.67	8.37		8.35007	33.2	0.7	6	7.3	7.6	6.6	41520.5	USB4000-VIS-RF52054	SHMSL	U1426A-2H-4A, 67.0cm		2
346	U1426	A	2	H	4	A	68	7.68	8.38		8.36007	32.3	0.6	4.9	6.9	7.2	6.5	41520.5	USB4000-VIS-RF52054	SHMSL	U1426A-2H-4A, 68.0cm		2
346	U1426	A	2	H	4	A	69	7.69	8.39		8.37007	33.7	0	4.6	7.5	7.9	7.2	41520.5	USB4000-VIS-RF52054	SHMSL	U1426A-2H-4A, 69.0cm		2
346	U1426	A	2	H	4	A	70	7.7	8.4		8.38007	37.2	-0.4	3.7	9.1	9.7	9.2	41520.5	USB4000-VIS-RF52054	SHMSL	U1426A-2H-4A, 70.0cm		2
346	U1426	A	2	H	4	A	71	7.71	8.41		8.39007	39	-0.1	2.9	10.1	10.7	10.4	41520.5	USB4000-VIS-RF52054	SHMSL	U1426A-2H-4A, 71.0cm		2
346	U1426	A	2	H	4	A	72	7.72	8.42		8.40007	39.5	-0.1	3.1	10.4	11	10.7	41520.5	USB4000-VIS-RF52054	SHMSL	U1426A-2H-4A, 72.0cm		2
346	U1426	A	2	H	4	A	73	7.73	8.43		8.41007	39.5	0.1	1.9	10.4	11	11.1	41520.5	USB4000-VIS-RF52054	SHMSL	U1426A-2H-4A, 73.0cm		2
346	U1426	A	2	H	4	A	74	7.74	8.44		8.42007	39.4	0	1.9	10.3	10.9	11	41520.5	USB4000-VIS-RF52054	SHMSL	U1426A-2H-4A, 74.0cm		2
346	U1426	A	2	H	4	A	75	7.75	8.45		8.43007	40.4	0.1	1.3	10.9	11.5	11.8	41520.5	USB4000-VIS-RF52054	SHMSL	U1426A-2H-4A, 75.0cm		2
346	U1426	A	2	H	4	A	76	7.76	8.46		8.44007	36.4	-0.8	4.6	8.6	9.2	8.5	41520.5	USB4000-VIS-RF52054	SHMSL	U1426A-2H-4A, 76.0cm		2
346	U1426	A	2	H	4	A	77	7.77	8.47		8.45007	35.8	-0.8	4.1	8.4	8.9	8.3	41520.5	USB4000-VIS-RF52054	SHMSL	U1426A-2H-4A, 77.0cm		2
346	U1426	A	2	H	4	A	78	7.78	8.48		8.46007	37	-1	4.6	8.9	9.5	8.8	41520.5	USB4000-VIS-RF52054	SHMSL	U1426A-2H-4A, 78.0cm		2
346	U1426	A	2	H	4	A	79	7.79	8.49		8.47007	37.3	-0.9	4.5	9.1	9.7	8.9	41520.5	USB4000-VIS-RF52054	SHMSL	U1426A-2H-4A, 79.0cm		2
346	U1426	A	2	H	4	A	80	7.8	8.5		8.48007	38.3	-0.6	3.8	9.6	10.3	9.7	41520.5	USB4000-VIS-RF52054	SHMSL	U1426A-2H-4A, 80.0cm		2
346	U1426	A	2	H	4	A	81	7.81	8.51		8.49007	37.2	-0.9	4.4	9	9.6	8.9	41520.5	USB4000-VIS-RF52054	SHMSL	U1426A-2H-4A, 81.0cm		2
346	U1426	A	2	H	4	A	82	7.82	8.52		8.50007	38.1	-0.8	3.9	9.5	10.1	9.6	41520.5	USB4000-VIS-RF52054	SHMSL	U1426A-2H-4A, 82.0cm		2
346	U1426	A	2	H	4	A	83	7.83	8.53		8.51007	37.8	-1	4.7	9.4	10	9.2	41520.5	USB4000-VIS-RF52054	SHMSL	U1426A-2H-4A, 83.0cm		2
346	U1426	A	2	H	4	A	84	7.84	8.54		8.52007	40.1	-0.5	2.4	10.7	11.3	11.3	41520.5	USB4000-VIS-RF52054	SHMSL	U1426A-2H-4A, 84.0cm		2
346	U1426	A	2	H	4	A	85	7.85	8.55		8.53007	40.6	0.1	0.7	11	11.6	12.2	41520.5	USB4000-VIS-RF52054	SHMSL	U1426A-2H-4A, 85.0cm		2
346	U1426	A	2	H	4	A	86	7.86	8.56		8.54007	38.7	-0.7	3.4	9.9	10.5	10.1	41520.5	USB4000-VIS-RF52054	SHMSL	U1426A-2H-4A, 86.0cm		2
346	U1426	A	2	H	4	A	87	7.87	8.57		8.55007	39	-0.8	4.7	10	10.6	9.8	41520.5	USB4000-VIS-RF52054	SHMSL	U1426A-2H-4A, 87.0cm		2
346	U1426	A	2	H	4	A	88	7.88	8.58		8.56007	38.3	-0.6	4.6	9.6	10.2	9.5	41520.5	USB4000-VIS-RF52054	SHMSL	U1426A-2H-4A, 88.0cm		2
346	U1426	A	2	H	4	A	89	7.89	8.59		8.57007	38.5	-0.7	4.6	9.7	10.3	9.5	41520.5	USB4000-VIS-RF52054	SHMSL	U1426A-2H-4A, 89.0cm		2
346	U1426	A	2	H	4	A	90	7.9	8.6		8.58007	37.2	-0.5	4.9	9.1	9.6	8.8	41520.5	USB4000-VIS-RF52054	SHMSL	U1426A-2H-4A, 90.0cm		2
346	U1426	A	2	H	4	A	91	7.91	8.61		8.59007	34.6	-0.5	5	7.8	8.3	7.5	41520.5	USB4000-VIS-RF52054	SHMSL	U1426A-2H-4A, 91.0cm		2
346	U1426	A	2	H	4	A	92	7.92	8.62		8.60007	33.6	-0.3	5.6	7.4	7.8	6.8	41520.5	USB4000-VIS-RF52054	SHMSL	U1426A-2H-4A, 92.0cm		2
346	U1426	A	2	H	4	A	93	7.93	8.63		8.61007	32.1	-0.4	5.9	6.7	7.1	6.1	41520.5	USB4000-VIS-RF52054	SHMSL	U1426A-2H-4A, 93.0cm		2
346	U1426	A	2	H	4	A	94	7.94	8.64		8.62007	31.3	-0.1	5.2	6.4	6.8	6	41520.5	USB4000-VIS-RF52054	SHMSL	U1426A-2H-4A, 94.0cm		2
346	U1426	A	2	H	4	A	95	7.95	8.65		8.63007	29	-0.1	6.3	5.5	5.9	4.9	41520.5	USB4000-VIS-RF52054	SHMSL	U1426A-2H-4A, 95.0cm		2
346	U1426	A	2	H	4	A	96	7.96	8.66		8.64007	27.9	0.2	5.6	5.2	5.4	4.6	41520.5	USB4000-VIS-RF52054	SHMSL	U1426A-2H-4A, 96.0cm		2
346	U1426	A	2	H	4	A	97	7.97	8.67		8.65007	30	-0.1	6	5.9	6.2	5.3	41520.5	USB4000-VIS-RF52054	SHMSL	U1426A-2H-4A, 97.0cm		2
346	U1426	A	2	H	4	A	98	7.98	8.68		8.66007	28.7	0.1	6.4	5.4	5.7	4.7	41520.5	USB4000-VIS-RF52054	SHMSL	U1426A-2H-4A, 98.0cm		2
346	U1426	A	2	H	4	A	99	7.99	8.69		8.67007	28.9	0.4	5.2	5.5	5.8	5	41520.5	USB4000-VIS-RF52054	SHMSL	U1426A-2H-4A, 99.0cm		2
346	U1426	A	2	H	4	A	100	8	8.7		8.68007	28.6	0.2	5.9	5.4	5.7	4.8	41520.5	USB4000-VIS-RF52054	SHMSL	U1426A-2H-4A, 100.0cm		2
346	U1426	A	2	H	4	A	101	8.01	8.71		8.69007	31.3	0.2	5.6	6.4	6.8	5.9	41520.5	USB4000-VIS-RF52054	SHMSL	U1426A-2H-4A, 101.0cm		2
346	U1426	A	2	H	4	A	102	8.02	8.72		8.70007	28.7	-0.1	5.8	5.4	5.7	4.9	41520.5	USB4000-VIS-RF52054	SHMSL	U1426A-2H-4A, 102.0cm		2
346	U1426	A	2	H	4	A	103	8.03	8.73		8.71007	25.6	0.7	5.8	4.4	4.6	3.8	41520.5	USB4000-VIS-RF52054	SHMSL	U1426A-2H-4A, 103.0cm		2
346	U1426	A	2	H	4	A	104	8.04	8.74		8.72007	26	0.6	5.7	4.5	4.7	4	41520.5	USB4000-VIS-RF52054	SHMSL	U1426A-2H-4A, 104.0cm		2
346	U1426	A	2	H	4	A	105	8.05	8.75		8.73007	25.8	0.5	5.8	4.5	4.7	3.9	41520.5	USB4000-VIS-RF52054	SHMSL	U1426A-2H-4A, 105.0cm		2
346	U1426	A	2	H	4	A	106	8.06	8.76		8.74007	25.1	0.4	8	4.2	4.4	3.3	41520.5	USB4000-VIS-RF52054	SHMSL	U1426A-2H-4A, 106.0cm		2
346	U1426	A	2	H	4	A	107	8.07	8.77		8.75007	25.7	0.6	8.1	4.5	4.7	3.5	41520.5	USB4000-VIS-RF52054	SHMSL	U1426A-2H-4A, 107.0cm		2
346	U1426	A	2	H	4	A	108	8.08	8.78		8.76007	27	0.6	8.4	4.9	5.1	3.8	41520.5	USB4000-VIS-RF52054	SHMSL	U1426A-2H-4A, 108.0cm		2
346	U1426	A	2	H	4	A	109	8.09	8.79		8.77007	26.3	0.7	8.3	4.6	4.8	3.6	41520.5	USB4000-VIS-RF52054	SHMSL	U1426A-2H-4A, 109.0cm		2
346	U1426	A	2	H	4	A	110	8.1	8.8		8.78007	26.3	0.6	7.8	4.7	4.9	3.7	41520.5	USB4000-VIS-RF52054	SHMSL	U1426A-2H-4A, 110.0cm		2
346	U1426	A	2	H	4	A	111	8.11	8.81		8.79007	28.8	0.2	7	5.5	5.8	4.7	41520.5	USB4000-VIS-RF52054	SHMSL	U1426A-2H-4A, 111.0cm		2
346	U1426	A	2	H	4	A	112	8.12	8.82		8.80007	30	0	6.2	5.9	6.2	5.3	41520.5	USB4000-VIS-RF52054	SHMSL	U1426A-2H-4A, 112.0cm		2
346	U1426	A	2	H	4	A	113	8.13	8.83		8.81007	33.3	-0.4	6.5	7.2	7.7	6.5	41520.5	USB4000-VIS-RF52054	SHMSL	U1426A-2H-4A, 113.0cm		2
346	U1426	A	2	H	4	A	114	8.14	8.84		8.82007	36.4	-0.6	6	8.7	9.2	8.1	41520.5	USB4000-VIS-RF52054	SHMSL	U1426A-2H-4A, 114.0cm		2
346	U1426	A	2	H	4	A	115	8.15	8.85		8.83007	37.9	-0.7	5.7	9.4	10	8.9	41520.5	USB4000-VIS-RF52054	SHMSL	U1426A-2H-4A, 115.0cm		2
346	U1426	A	2	H	4	A	116	8.16	8.86		8.84007	39.7	-0.5	4.9	10.4	11.1	10.2	41520.5	USB4000-VIS-RF52054	SHMSL	U1426A-2H-4A, 116.0cm		2
346	U1426	A	2	H	4	A	117	8.17	8.87		8.85007	38.9	-0.4	4.3	10	10.6	9.9	41520.5	USB4000-VIS-RF52054	SHMSL	U1426A-2H-4A, 117.0cm		2
346	U1426	A	2	H	4	A	118	8.18	8.88		8.86007	37.8	-0.5	5	9.4	10	9.1	41520.5	USB4000-VIS-RF52054	SHMSL	U1426A-2H-4A, 118.0cm		2
346	U1426	A	2	H	4	A	119	8.19	8.89		8.87007	39.9	-0.2	4.2	10.6	11.2	10.6	41520.5	USB4000-VIS-RF52054	SHMSL	U1426A-2H-4A, 119.0cm		2
346	U1426	A	2	H	4	A	120	8.2	8.9		8.88007	40.2	-0.2	3.6	10.8	11.4	10.9	41520.5	USB4000-VIS-RF52054	SHMSL	U1426A-2H-4A, 120.0cm		2
346	U1426	A	2	H	4	A	121	8.21	8.91		8.89007	39.7	-0.2	3.8	10.5	11	10.5	41520.5	USB4000-VIS-RF52054	SHMSL	U1426A-2H-4A, 121.0cm		2
346	U1426	A	2	H	4	A	122	8.22	8.92		8.90007	38.6	-0.5	4.4	9.8	10.4	9.7	41520.5	USB4000-VIS-RF52054	SHMSL	U1426A-2H-4A, 122.0cm		2
346	U1426	A	2	H	4	A	123	8.23	8.93		8.91007	40.2	-0.1	3.2	10.8	11.4	11	41520.5	USB4000-VIS-RF52054	SHMSL	U1426A-2H-4A, 123.0cm		2
346	U1426	A	2	H	4	A	124	8.24	8.94		8.92007	37	-0.6	5.3	9	9.5	8.6	41520.5	USB4000-VIS-RF52054	SHMSL	U1426A-2H-4A, 124.0cm		2
346	U1426	A	2	H	4	A	125	8.25	8.95		8.93007	38.1	-0.5	4.4	9.5	10.1	9.4	41520.5	USB4000-VIS-RF52054	SHMSL	U1426A-2H-4A, 125.0cm		2
346	U1426	A	2	H	4	A	126	8.26	8.96		8.94007	37	-0.7	4.7	9	9.5	8.8	41520.5	USB4000-VIS-RF52054	SHMSL	U1426A-2H-4A, 126.0cm		2
346	U1426	A	2	H	4	A	127	8.27	8.97		8.95007	36.5	-0.5	4.7	8.7	9.3	8.5	41520.5	USB4000-VIS-RF52054	SHMSL	U1426A-2H-4A, 127.0cm		2
346	U1426	A	2	H	4	A	128	8.28	8.98		8.96007	38.2	-0.2	4	9.6	10.2	9.6	41520.5	USB4000-VIS-RF52054	SHMSL	U1426A-2H-4A, 128.0cm		2
346	U1426	A	2	H	4	A	129	8.29	8.99		8.97007	36.1	-0.6	5.2	8.5	9.1	8.2	41520.5	USB4000-VIS-RF52054	SHMSL	U1426A-2H-4A, 129.0cm		2
346	U1426	A	2	H	4	A	130	8.3	9		8.98007	34.6	0	4.7	7.9	8.3	7.6	41520.5	USB4000-VIS-RF52054	SHMSL	U1426A-2H-4A, 130.0cm		2
346	U1426	A	2	H	4	A	131	8.31	9.01		8.99007	33.6	-0.1	5.1	7.4	7.8	7	41520.5	USB4000-VIS-RF52054	SHMSL	U1426A-2H-4A, 131.0cm		2
346	U1426	A	2	H	4	A	132	8.32	9.02		9.00007	31.3	-0.2	6	6.4	6.8	5.8	41520.5	USB4000-VIS-RF52054	SHMSL	U1426A-2H-4A, 132.0cm		2
346	U1426	A	2	H	4	A	133	8.33	9.03		9.01007	30.9	-0.5	5.9	6.2	6.6	5.7	41520.5	USB4000-VIS-RF52054	SHMSL	U1426A-2H-4A, 133.0cm		2
346	U1426	A	2	H	4	A	134	8.34	9.04		9.02007	27.6	-0.1	5.3	5	5.3	4.6	41520.5	USB4000-VIS-RF52054	SHMSL	U1426A-2H-4A, 134.0cm		2
346	U1426	A	2	H	4	A	135	8.35	9.05		9.03007	32.8	0.1	3	7.1	7.4	7.1	41520.5	USB4000-VIS-RF52054	SHMSL	U1426A-2H-4A, 135.0cm		2
346	U1426	A	2	H	4	A	136	8.36	9.06		9.04007	29.3	0	5.2	5.6	5.9	5.2	41520.5	USB4000-VIS-RF52054	SHMSL	U1426A-2H-4A, 136.0cm		2
346	U1426	A	2	H	4	A	137	8.37	9.07		9.05007	27.8	0.2	4.9	5.1	5.4	4.7	41520.5	USB4000-VIS-RF52054	SHMSL	U1426A-2H-4A, 137.0cm		2
346	U1426	A	2	H	4	A	138	8.38	9.08		9.06007	27.3	-0.1	6.4	4.9	5.2	4.3	41520.5	USB4000-VIS-RF52054	SHMSL	U1426A-2H-4A, 138.0cm		2
346	U1426	A	2	H	4	A	139	8.39	9.09		9.07007	26.5	0.1	6	4.7	4.9	4.1	41520.5	USB4000-VIS-RF52054	SHMSL	U1426A-2H-4A, 139.0cm		2
346	U1426	A	2	H	4	A	140	8.4	9.1		9.08007	30.2	0.3	4.3	6	6.3	5.7	41520.5	USB4000-VIS-RF52054	SHMSL	U1426A-2H-4A, 140.0cm		2
346	U1426	A	2	H	4	A	141	8.41	9.11		9.09007	28.7	0	7.5	5.4	5.7	4.5	41520.5	USB4000-VIS-RF52054	SHMSL	U1426A-2H-4A, 141.0cm		2
346	U1426	A	2	H	4	A	142	8.42	9.12		9.10007	26.2	0.3	6.8	4.6	4.8	3.9	41520.5	USB4000-VIS-RF52054	SHMSL	U1426A-2H-4A, 142.0cm		2
346	U1426	A	2	H	4	A	143	8.43	9.13		9.11007	25.1	0.4	5.9	4.3	4.5	3.7	41520.5	USB4000-VIS-RF52054	SHMSL	U1426A-2H-4A, 143.0cm		2
346	U1426	A	2	H	4	A	144	8.44	9.14		9.12007	25.4	0.1	5.9	4.3	4.5	3.8	41520.5	USB4000-VIS-RF52054	SHMSL	U1426A-2H-4A, 144.0cm		2
346	U1426	A	2	H	4	A	145	8.45	9.15		9.13007	26.1	0.1	5.6	4.6	4.8	4	41520.5	USB4000-VIS-RF52054	SHMSL	U1426A-2H-4A, 145.0cm		2
346	U1426	A	2	H	4	A	146	8.46	9.16		9.14007	26.6	0.1	6.2	4.7	5	4.1	41520.5	USB4000-VIS-RF52054	SHMSL	U1426A-2H-4A, 146.0cm		2
346	U1426	A	2	H	4	A	147	8.47	9.17		9.15007	27	0.1	5.9	4.8	5.1	4.3	41520.5	USB4000-VIS-RF52054	SHMSL	U1426A-2H-4A, 147.0cm		2
346	U1426	A	2	H	4	A	148	8.48	9.18		9.16007	24.5	0.1	4.1	4	4.3	3.8	41520.5	USB4000-VIS-RF52054	SHMSL	U1426A-2H-4A, 148.0cm		2
346	U1426	A	2	H	4	A	149	8.49	9.19		9.17007	24.2	0.2	5.1	4	4.2	3.5	41520.5	USB4000-VIS-RF52054	SHMSL	U1426A-2H-4A, 149.0cm		2
346	U1426	A	2	H	5	A	2	8.52	9.22		9.20007	29.5	1.1	0.8	5.8	6	6.3	41520.5	USB4000-VIS-RF52054	SHMSL	U1426A-2H-5A, 2.0cm		2
346	U1426	A	2	H	5	A	3	8.53	9.23		9.21007	24.8	0.3	4.3	4.2	4.4	3.9	41520.5	USB4000-VIS-RF52054	SHMSL	U1426A-2H-5A, 3.0cm		2
346	U1426	A	2	H	5	A	4	8.54	9.24		9.22007	25.1	0.4	4.1	4.2	4.4	4	41520.5	USB4000-VIS-RF52054	SHMSL	U1426A-2H-5A, 4.0cm		2
346	U1426	A	2	H	5	A	5	8.55	9.25		9.23007	25	0.4	4	4.2	4.4	4	41520.5	USB4000-VIS-RF52054	SHMSL	U1426A-2H-5A, 5.0cm		2
346	U1426	A	2	H	5	A	6	8.56	9.26		9.24007	24.9	0.3	4.3	4.2	4.4	3.9	41520.5	USB4000-VIS-RF52054	SHMSL	U1426A-2H-5A, 6.0cm		2
346	U1426	A	2	H	5	A	7	8.57	9.27		9.25007	25.3	0.2	4.1	4.3	4.5	4.1	41520.5	USB4000-VIS-RF52054	SHMSL	U1426A-2H-5A, 7.0cm		2
346	U1426	A	2	H	5	A	8	8.58	9.28		9.26007	24.5	0.4	3.9	4.1	4.3	3.9	41520.5	USB4000-VIS-RF52054	SHMSL	U1426A-2H-5A, 8.0cm		2
346	U1426	A	2	H	5	A	9	8.59	9.29		9.27007	24.3	0.3	4.2	4	4.2	3.7	41520.5	USB4000-VIS-RF52054	SHMSL	U1426A-2H-5A, 9.0cm		2
346	U1426	A	2	H	5	A	10	8.6	9.3		9.28007	24.5	0.3	4.2	4	4.2	3.8	41520.5	USB4000-VIS-RF52054	SHMSL	U1426A-2H-5A, 10.0cm		2
346	U1426	A	2	H	5	A	11	8.61	9.31		9.29007	24.6	0.5	4	4.1	4.3	3.8	41520.5	USB4000-VIS-RF52054	SHMSL	U1426A-2H-5A, 11.0cm		2
346	U1426	A	2	H	5	A	12	8.62	9.32		9.30007	24.6	0.4	4.1	4.1	4.3	3.8	41520.5	USB4000-VIS-RF52054	SHMSL	U1426A-2H-5A, 12.0cm		2
346	U1426	A	2	H	5	A	13	8.63	9.33		9.31007	23.8	0.4	4.2	3.9	4	3.6	41520.5	USB4000-VIS-RF52054	SHMSL	U1426A-2H-5A, 13.0cm		2
346	U1426	A	2	H	5	A	14	8.64	9.34		9.32007	24.1	0.3	4.1	3.9	4.1	3.7	41520.5	USB4000-VIS-RF52054	SHMSL	U1426A-2H-5A, 14.0cm		2
346	U1426	A	2	H	5	A	15	8.65	9.35		9.33007	24.2	0.3	3.6	4	4.2	3.8	41520.5	USB4000-VIS-RF52054	SHMSL	U1426A-2H-5A, 15.0cm		2
346	U1426	A	2	H	5	A	16	8.66	9.36		9.34007	24.6	0.3	3.9	4.1	4.3	3.9	41520.5	USB4000-VIS-RF52054	SHMSL	U1426A-2H-5A, 16.0cm		2
346	U1426	A	2	H	5	A	17	8.67	9.37		9.35007	25.6	0.2	3.9	4.4	4.6	4.2	41520.5	USB4000-VIS-RF52054	SHMSL	U1426A-2H-5A, 17.0cm		2
346	U1426	A	2	H	5	A	18	8.68	9.38		9.36007	24.7	0.2	4.7	4.1	4.3	3.8	41520.5	USB4000-VIS-RF52054	SHMSL	U1426A-2H-5A, 18.0cm		2
346	U1426	A	2	H	5	A	19	8.69	9.39		9.37007	24.5	0.3	4	4.1	4.3	3.8	41520.5	USB4000-VIS-RF52054	SHMSL	U1426A-2H-5A, 19.0cm		2
346	U1426	A	2	H	5	A	20	8.7	9.4		9.38007	24.2	0.4	4	4	4.2	3.8	41520.5	USB4000-VIS-RF52054	SHMSL	U1426A-2H-5A, 20.0cm		2
346	U1426	A	2	H	5	A	21	8.71	9.41		9.39007	23.7	0.4	4.3	3.8	4	3.5	41520.5	USB4000-VIS-RF52054	SHMSL	U1426A-2H-5A, 21.0cm		2
346	U1426	A	2	H	5	A	22	8.72	9.42		9.40007	24.3	0.4	4.1	4	4.2	3.7	41520.5	USB4000-VIS-RF52054	SHMSL	U1426A-2H-5A, 22.0cm		2
346	U1426	A	2	H	5	A	23	8.73	9.43		9.41007	25.9	0.5	3.7	4.5	4.7	4.3	41520.5	USB4000-VIS-RF52054	SHMSL	U1426A-2H-5A, 23.0cm		2
346	U1426	A	2	H	5	A	24	8.74	9.44		9.42007	26.1	0.5	3.3	4.6	4.8	4.5	41520.5	USB4000-VIS-RF52054	SHMSL	U1426A-2H-5A, 24.0cm		2
346	U1426	A	2	H	5	A	25	8.75	9.45		9.43007	25	0.5	3.4	4.2	4.4	4.1	41520.5	USB4000-VIS-RF52054	SHMSL	U1426A-2H-5A, 25.0cm		2
346	U1426	A	2	H	5	A	26	8.76	9.46		9.44007	25.8	0.8	2.3	4.5	4.7	4.6	41520.5	USB4000-VIS-RF52054	SHMSL	U1426A-2H-5A, 26.0cm		2
346	U1426	A	2	H	5	A	27	8.77	9.47		9.45007	26.2	0.4	3.5	4.6	4.8	4.4	41520.5	USB4000-VIS-RF52054	SHMSL	U1426A-2H-5A, 27.0cm		2
346	U1426	A	2	H	5	A	28	8.78	9.48		9.46007	25.1	0.5	3.4	4.3	4.5	4.1	41520.5	USB4000-VIS-RF52054	SHMSL	U1426A-2H-5A, 28.0cm		2
346	U1426	A	2	H	5	A	29	8.79	9.49		9.47007	25.4	0.6	3.1	4.4	4.5	4.3	41520.5	USB4000-VIS-RF52054	SHMSL	U1426A-2H-5A, 29.0cm		2
346	U1426	A	2	H	5	A	30	8.8	9.5		9.48007	24.3	0.5	4.2	4	4.2	3.7	41520.5	USB4000-VIS-RF52054	SHMSL	U1426A-2H-5A, 30.0cm		2
346	U1426	A	2	H	5	A	31	8.81	9.51		9.49007	24.5	0.7	2.8	4.1	4.3	4	41520.5	USB4000-VIS-RF52054	SHMSL	U1426A-2H-5A, 31.0cm		2
346	U1426	A	2	H	5	A	32	8.82	9.52		9.50007	24.3	0.8	3.6	4	4.2	3.8	41520.5	USB4000-VIS-RF52054	SHMSL	U1426A-2H-5A, 32.0cm		2
346	U1426	A	2	H	5	A	33	8.83	9.53		9.51007	23.7	0.9	3.9	3.9	4	3.6	41520.5	USB4000-VIS-RF52054	SHMSL	U1426A-2H-5A, 33.0cm		2
346	U1426	A	2	H	5	A	34	8.84	9.54		9.52007	24.5	0.6	3.4	4.1	4.3	3.9	41520.5	USB4000-VIS-RF52054	SHMSL	U1426A-2H-5A, 34.0cm		2
346	U1426	A	2	H	5	A	35	8.85	9.55		9.53007	23.1	0.6	4.3	3.7	3.8	3.4	41520.5	USB4000-VIS-RF52054	SHMSL	U1426A-2H-5A, 35.0cm		2
346	U1426	A	2	H	5	A	36	8.86	9.56		9.54007	25.4	0.6	3.8	4.4	4.6	4.2	41520.5	USB4000-VIS-RF52054	SHMSL	U1426A-2H-5A, 36.0cm		2
346	U1426	A	2	H	5	A	37	8.87	9.57		9.55007	24.6	0.7	4	4.1	4.3	3.9	41520.5	USB4000-VIS-RF52054	SHMSL	U1426A-2H-5A, 37.0cm		2
346	U1426	A	2	H	5	A	38	8.88	9.58		9.56007	24.2	0.8	4.5	4	4.2	3.7	41520.5	USB4000-VIS-RF52054	SHMSL	U1426A-2H-5A, 38.0cm		2
346	U1426	A	2	H	5	A	39	8.89	9.59		9.57007	24.5	0.6	4.1	4.1	4.3	3.8	41520.5	USB4000-VIS-RF52054	SHMSL	U1426A-2H-5A, 39.0cm		2
346	U1426	A	2	H	5	A	40	8.9	9.6		9.58007	23.5	0.7	4.2	3.8	4	3.5	41520.5	USB4000-VIS-RF52054	SHMSL	U1426A-2H-5A, 40.0cm		2
346	U1426	A	2	H	5	A	41	8.91	9.61		9.59007	22.7	0.5	4.1	3.6	3.7	3.3	41520.5	USB4000-VIS-RF52054	SHMSL	U1426A-2H-5A, 41.0cm		2
346	U1426	A	2	H	5	A	42	8.92	9.62		9.60007	22.3	0.5	3.7	3.4	3.6	3.2	41520.5	USB4000-VIS-RF52054	SHMSL	U1426A-2H-5A, 42.0cm		2
346	U1426	A	2	H	5	A	43	8.93	9.63		9.61007	23.8	0.6	3.8	3.9	4	3.7	41520.5	USB4000-VIS-RF52054	SHMSL	U1426A-2H-5A, 43.0cm		2
346	U1426	A	2	H	5	A	44	8.94	9.64		9.62007	24.9	0.6	4.4	4.2	4.4	3.9	41520.5	USB4000-VIS-RF52054	SHMSL	U1426A-2H-5A, 44.0cm		2
346	U1426	A	2	H	5	A	45	8.95	9.65		9.63007	25.5	0.6	4.7	4.4	4.6	4	41520.5	USB4000-VIS-RF52054	SHMSL	U1426A-2H-5A, 45.0cm		2
346	U1426	A	2	H	5	A	46	8.96	9.66		9.64007	25.5	0.7	4.8	4.4	4.6	4	41520.5	USB4000-VIS-RF52054	SHMSL	U1426A-2H-5A, 46.0cm		2
346	U1426	A	2	H	5	A	47	8.97	9.67		9.65007	24.8	0.7	4.7	4.2	4.4	3.8	41520.5	USB4000-VIS-RF52054	SHMSL	U1426A-2H-5A, 47.0cm		2
346	U1426	A	2	H	5	A	48	8.98	9.68		9.66007	25.2	0.6	4.1	4.3	4.5	4	41520.5	USB4000-VIS-RF52054	SHMSL	U1426A-2H-5A, 48.0cm		2
346	U1426	A	2	H	5	A	49	8.99	9.69		9.67007	25	0.4	4.5	4.2	4.4	3.9	41520.5	USB4000-VIS-RF52054	SHMSL	U1426A-2H-5A, 49.0cm		2
346	U1426	A	2	H	5	A	50	9	9.7		9.68007	25.4	0.5	4.2	4.4	4.5	4.1	41520.5	USB4000-VIS-RF52054	SHMSL	U1426A-2H-5A, 50.0cm		2
346	U1426	A	2	H	5	A	51	9.01	9.71		9.69007	25.1	0.6	4	4.3	4.4	4	41520.5	USB4000-VIS-RF52054	SHMSL	U1426A-2H-5A, 51.0cm		2
346	U1426	A	2	H	5	A	52	9.02	9.72		9.70007	25.1	0.3	4.2	4.2	4.4	4	41520.5	USB4000-VIS-RF52054	SHMSL	U1426A-2H-5A, 52.0cm		2
346	U1426	A	2	H	5	A	53	9.03	9.73		9.71007	24.2	0.4	4.2	4	4.2	3.7	41520.5	USB4000-VIS-RF52054	SHMSL	U1426A-2H-5A, 53.0cm		2
346	U1426	A	2	H	5	A	54	9.04	9.74		9.72007	24.7	0.5	4.2	4.1	4.3	3.9	41520.5	USB4000-VIS-RF52054	SHMSL	U1426A-2H-5A, 54.0cm		2
346	U1426	A	2	H	5	A	55	9.05	9.75		9.73007	24.8	0.4	4.8	4.1	4.3	3.8	41520.5	USB4000-VIS-RF52054	SHMSL	U1426A-2H-5A, 55.0cm		2
346	U1426	A	2	H	5	A	56	9.06	9.76		9.74007	25.2	0.5	5	4.3	4.5	3.9	41520.5	USB4000-VIS-RF52054	SHMSL	U1426A-2H-5A, 56.0cm		2
346	U1426	A	2	H	5	A	57	9.07	9.77		9.75007	26.1	0.8	4.4	4.6	4.8	4.3	41520.5	USB4000-VIS-RF52054	SHMSL	U1426A-2H-5A, 57.0cm		2
346	U1426	A	2	H	5	A	58	9.08	9.78		9.76007	27.4	0.8	5.3	5	5.2	4.5	41520.5	USB4000-VIS-RF52054	SHMSL	U1426A-2H-5A, 58.0cm		2
346	U1426	A	2	H	5	A	59	9.09	9.79		9.77007	27.4	0.7	4.7	5	5.2	4.6	41520.5	USB4000-VIS-RF52054	SHMSL	U1426A-2H-5A, 59.0cm		2
346	U1426	A	2	H	5	A	60	9.1	9.8		9.78007	28.1	0.3	3.9	5.2	5.5	5	41520.5	USB4000-VIS-RF52054	SHMSL	U1426A-2H-5A, 60.0cm		2
346	U1426	A	2	H	5	A	61	9.11	9.81		9.79007	28.3	0	4.5	5.3	5.6	5	41520.5	USB4000-VIS-RF52054	SHMSL	U1426A-2H-5A, 61.0cm		2
346	U1426	A	2	H	5	A	62	9.12	9.82		9.80007	28.4	0.1	4.3	5.3	5.6	5	41520.5	USB4000-VIS-RF52054	SHMSL	U1426A-2H-5A, 62.0cm		2
346	U1426	A	2	H	5	A	63	9.13	9.83		9.81007	27	0.4	5.1	4.9	5.1	4.4	41520.5	USB4000-VIS-RF52054	SHMSL	U1426A-2H-5A, 63.0cm		2
346	U1426	A	2	H	5	A	64	9.14	9.84		9.82007	28.8	0.6	4.1	5.5	5.7	5.2	41520.5	USB4000-VIS-RF52054	SHMSL	U1426A-2H-5A, 64.0cm		2
346	U1426	A	2	H	5	A	65	9.15	9.85		9.83007	28.3	0.3	4.6	5.3	5.6	4.9	41520.5	USB4000-VIS-RF52054	SHMSL	U1426A-2H-5A, 65.0cm		2
346	U1426	A	2	H	5	A	66	9.16	9.86		9.84007	28.8	0.1	4.5	5.5	5.8	5.2	41520.5	USB4000-VIS-RF52054	SHMSL	U1426A-2H-5A, 66.0cm		2
346	U1426	A	2	H	5	A	67	9.17	9.87		9.85007	29.5	0.2	4.6	5.8	6	5.4	41520.5	USB4000-VIS-RF52054	SHMSL	U1426A-2H-5A, 67.0cm		2
346	U1426	A	2	H	5	A	68	9.18	9.88		9.86007	29.1	0	5	5.6	5.9	5.2	41520.5	USB4000-VIS-RF52054	SHMSL	U1426A-2H-5A, 68.0cm		2
346	U1426	A	2	H	5	A	69	9.19	9.89		9.87007	29.7	0	4.5	5.8	6.1	5.5	41520.5	USB4000-VIS-RF52054	SHMSL	U1426A-2H-5A, 69.0cm		2
346	U1426	A	2	H	5	A	70	9.2	9.9		9.88007	30.5	-0.1	4.4	6.1	6.4	5.8	41520.5	USB4000-VIS-RF52054	SHMSL	U1426A-2H-5A, 70.0cm		2
346	U1426	A	2	H	5	A	71	9.21	9.91		9.89007	30.8	0	3.9	6.2	6.6	6.1	41520.5	USB4000-VIS-RF52054	SHMSL	U1426A-2H-5A, 71.0cm		2
346	U1426	A	2	H	5	A	72	9.22	9.92		9.90007	31.2	-0.1	3.7	6.4	6.7	6.3	41520.5	USB4000-VIS-RF52054	SHMSL	U1426A-2H-5A, 72.0cm		2
346	U1426	A	2	H	5	A	73	9.23	9.93		9.91007	31.7	0.1	3.4	6.6	7	6.6	41520.5	USB4000-VIS-RF52054	SHMSL	U1426A-2H-5A, 73.0cm		2
346	U1426	A	2	H	5	A	74	9.24	9.94		9.92007	31.8	0	3.3	6.7	7	6.7	41520.5	USB4000-VIS-RF52054	SHMSL	U1426A-2H-5A, 74.0cm		2
346	U1426	A	2	H	5	A	75	9.25	9.95		9.93007	31.9	0	3.7	6.7	7	6.6	41520.5	USB4000-VIS-RF52054	SHMSL	U1426A-2H-5A, 75.0cm		2
346	U1426	A	2	H	5	A	76	9.26	9.96		9.94007	32.7	0.1	3.4	7	7.4	7	41520.5	USB4000-VIS-RF52054	SHMSL	U1426A-2H-5A, 76.0cm		2
346	U1426	A	2	H	5	A	77	9.27	9.97		9.95007	32.3	-0.1	3.8	6.8	7.2	6.7	41520.5	USB4000-VIS-RF52054	SHMSL	U1426A-2H-5A, 77.0cm		2
346	U1426	A	2	H	5	A	78	9.28	9.98		9.96007	34.1	0.2	3	7.7	8.1	7.8	41520.5	USB4000-VIS-RF52054	SHMSL	U1426A-2H-5A, 78.0cm		2
346	U1426	A	2	H	5	A	79	9.29	9.99		9.97007	32.5	-0.1	3.7	6.9	7.3	6.9	41520.5	USB4000-VIS-RF52054	SHMSL	U1426A-2H-5A, 79.0cm		2
346	U1426	A	2	H	5	A	80	9.3	10		9.98007	32.6	-0.1	3.5	7	7.4	7	41520.5	USB4000-VIS-RF52054	SHMSL	U1426A-2H-5A, 80.0cm		2
346	U1426	A	2	H	5	A	81	9.31	10.01		9.99007	33.3	0	3.3	7.3	7.7	7.3	41520.5	USB4000-VIS-RF52054	SHMSL	U1426A-2H-5A, 81.0cm		2
346	U1426	A	2	H	5	A	82	9.32	10.02		10.0001	33.5	-0.1	3.5	7.4	7.8	7.4	41520.5	USB4000-VIS-RF52054	SHMSL	U1426A-2H-5A, 82.0cm		2
346	U1426	A	2	H	5	A	83	9.33	10.03		10.0101	33.6	0	3.1	7.4	7.8	7.5	41520.5	USB4000-VIS-RF52054	SHMSL	U1426A-2H-5A, 83.0cm		2
346	U1426	A	2	H	5	A	84	9.34	10.04		10.0201	33.1	0	3.1	7.2	7.6	7.3	41520.5	USB4000-VIS-RF52054	SHMSL	U1426A-2H-5A, 84.0cm		2
346	U1426	A	2	H	5	A	85	9.35	10.05		10.0301	32.6	-0.2	3.6	7	7.4	6.9	41520.5	USB4000-VIS-RF52054	SHMSL	U1426A-2H-5A, 85.0cm		2
346	U1426	A	2	H	5	A	86	9.36	10.06		10.0401	34.6	-0.2	3.3	7.8	8.3	7.9	41520.5	USB4000-VIS-RF52054	SHMSL	U1426A-2H-5A, 86.0cm		2
346	U1426	A	2	H	5	A	87	9.37	10.07		10.0501	33.8	-0.2	3.6	7.5	7.9	7.5	41520.5	USB4000-VIS-RF52054	SHMSL	U1426A-2H-5A, 87.0cm		2
346	U1426	A	2	H	5	A	88	9.38	10.08		10.0601	35.3	0	3	8.2	8.7	8.4	41520.5	USB4000-VIS-RF52054	SHMSL	U1426A-2H-5A, 88.0cm		2
346	U1426	A	2	H	5	A	89	9.39	10.09		10.0701	33.9	-0.2	3.7	7.5	7.9	7.5	41520.5	USB4000-VIS-RF52054	SHMSL	U1426A-2H-5A, 89.0cm		2
346	U1426	A	2	H	5	A	90	9.4	10.1		10.0801	33.6	-0.2	3.6	7.4	7.8	7.4	41520.5	USB4000-VIS-RF52054	SHMSL	U1426A-2H-5A, 90.0cm		2
346	U1426	A	2	H	5	A	91	9.41	10.11		10.0901	34.3	-0.1	3.5	7.7	8.2	7.8	41520.5	USB4000-VIS-RF52054	SHMSL	U1426A-2H-5A, 91.0cm		2
346	U1426	A	2	H	5	A	92	9.42	10.12		10.1001	34.3	-0.3	3.7	7.7	8.2	7.7	41520.5	USB4000-VIS-RF52054	SHMSL	U1426A-2H-5A, 92.0cm		2
346	U1426	A	2	H	5	A	93	9.43	10.13		10.1101	33.8	-0.3	4	7.5	7.9	7.4	41520.5	USB4000-VIS-RF52054	SHMSL	U1426A-2H-5A, 93.0cm		2
346	U1426	A	2	H	5	A	94	9.44	10.14		10.1201	34.6	-0.1	3.4	7.9	8.3	7.9	41520.5	USB4000-VIS-RF52054	SHMSL	U1426A-2H-5A, 94.0cm		2
346	U1426	A	2	H	5	A	95	9.45	10.15		10.1301	34.7	-0.1	3.5	7.9	8.3	7.9	41520.5	USB4000-VIS-RF52054	SHMSL	U1426A-2H-5A, 95.0cm		2
346	U1426	A	2	H	5	A	96	9.46	10.16		10.1401	34.1	-0.2	3.5	7.6	8.1	7.6	41520.5	USB4000-VIS-RF52054	SHMSL	U1426A-2H-5A, 96.0cm		2
346	U1426	A	2	H	5	A	97	9.47	10.17		10.1501	35.2	-0.1	3	8.1	8.6	8.3	41520.5	USB4000-VIS-RF52054	SHMSL	U1426A-2H-5A, 97.0cm		2
346	U1426	A	2	H	5	A	98	9.48	10.18		10.1601	35.9	-0.1	3.1	8.5	9	8.7	41520.5	USB4000-VIS-RF52054	SHMSL	U1426A-2H-5A, 98.0cm		2
346	U1426	A	2	H	5	A	99	9.49	10.19		10.1701	36.3	-0.3	3.3	8.7	9.2	8.8	41520.5	USB4000-VIS-RF52054	SHMSL	U1426A-2H-5A, 99.0cm		2
346	U1426	A	2	H	5	A	100	9.5	10.2		10.1801	34.7	-0.3	3.9	7.9	8.3	7.8	41520.5	USB4000-VIS-RF52054	SHMSL	U1426A-2H-5A, 100.0cm		2
346	U1426	A	2	H	5	A	101	9.51	10.21		10.1901	35.6	-0.4	3.9	8.3	8.8	8.2	41520.5	USB4000-VIS-RF52054	SHMSL	U1426A-2H-5A, 101.0cm		2
346	U1426	A	2	H	5	A	102	9.52	10.22		10.2001	36.4	-0.4	3.7	8.7	9.2	8.7	41520.5	USB4000-VIS-RF52054	SHMSL	U1426A-2H-5A, 102.0cm		2
346	U1426	A	2	H	5	A	103	9.53	10.23		10.2101	36.8	-0.3	4	8.9	9.5	8.9	41520.5	USB4000-VIS-RF52054	SHMSL	U1426A-2H-5A, 103.0cm		2
346	U1426	A	2	H	5	A	104	9.54	10.24		10.2201	36.3	-0.4	4.1	8.6	9.2	8.5	41520.5	USB4000-VIS-RF52054	SHMSL	U1426A-2H-5A, 104.0cm		2
346	U1426	A	2	H	5	A	105	9.55	10.25		10.2301	37.1	-0.1	3.3	9.1	9.6	9.2	41520.5	USB4000-VIS-RF52054	SHMSL	U1426A-2H-5A, 105.0cm		2
346	U1426	A	2	H	5	A	106	9.56	10.26		10.2401	36.2	-0.5	4.6	8.6	9.1	8.4	41520.5	USB4000-VIS-RF52054	SHMSL	U1426A-2H-5A, 106.0cm		2
346	U1426	A	2	H	5	A	107	9.57	10.27		10.2501	37.2	-0.2	3.6	9.1	9.6	9.2	41520.5	USB4000-VIS-RF52054	SHMSL	U1426A-2H-5A, 107.0cm		2
346	U1426	A	2	H	5	A	108	9.58	10.28		10.2601	36.1	-0.3	3.5	8.5	9	8.6	41520.5	USB4000-VIS-RF52054	SHMSL	U1426A-2H-5A, 108.0cm		2
346	U1426	A	2	H	5	A	109	9.59	10.29		10.2701	37.5	0.2	1.8	9.3	9.8	9.9	41520.5	USB4000-VIS-RF52054	SHMSL	U1426A-2H-5A, 109.0cm		2
346	U1426	A	2	H	5	A	110	9.6	10.3		10.2801	41.6	0.6	0.5	11.7	12.2	12.9	41520.5	USB4000-VIS-RF52054	SHMSL	U1426A-2H-5A, 110.0cm		2
346	U1426	A	2	H	5	A	111	9.61	10.31		10.2901	36.4	-0.3	4.2	8.7	9.2	8.6	41520.5	USB4000-VIS-RF52054	SHMSL	U1426A-2H-5A, 111.0cm		2
346	U1426	A	2	H	5	A	112	9.62	10.32		10.3001	35.4	-0.4	4.6	8.2	8.7	7.9	41520.5	USB4000-VIS-RF52054	SHMSL	U1426A-2H-5A, 112.0cm		2
346	U1426	A	2	H	5	A	113	9.63	10.33		10.3101	36.7	-0.2	3.1	8.9	9.4	9.1	41520.5	USB4000-VIS-RF52054	SHMSL	U1426A-2H-5A, 113.0cm		2
346	U1426	A	2	H	5	A	114	9.64	10.34		10.3201	39.8	0.7	-0.1	10.7	11.2	12	41520.5	USB4000-VIS-RF52054	SHMSL	U1426A-2H-5A, 114.0cm		2
346	U1426	A	2	H	5	A	115	9.65	10.35		10.3301	34.9	-0.3	3.2	8	8.4	8.1	41520.5	USB4000-VIS-RF52054	SHMSL	U1426A-2H-5A, 115.0cm		2
346	U1426	A	2	H	5	A	116	9.66	10.36		10.3401	35.9	-0.2	3.7	8.5	9	8.5	41520.5	USB4000-VIS-RF52054	SHMSL	U1426A-2H-5A, 116.0cm		2
346	U1426	A	2	H	5	A	117	9.67	10.37		10.3501	32	-0.4	5	6.7	7.1	6.3	41520.5	USB4000-VIS-RF52054	SHMSL	U1426A-2H-5A, 117.0cm		2
346	U1426	A	2	H	5	A	118	9.68	10.38		10.3601	32.6	-0.3	4.4	7	7.4	6.7	41520.5	USB4000-VIS-RF52054	SHMSL	U1426A-2H-5A, 118.0cm		2
346	U1426	A	2	H	5	A	119	9.69	10.39		10.3701	30	-0.3	5.1	5.9	6.2	5.5	41520.5	USB4000-VIS-RF52054	SHMSL	U1426A-2H-5A, 119.0cm		2
346	U1426	A	2	H	5	A	120	9.7	10.4		10.3801	30.7	-0.4	5.1	6.2	6.5	5.8	41520.5	USB4000-VIS-RF52054	SHMSL	U1426A-2H-5A, 120.0cm		2
346	U1426	A	2	H	5	A	121	9.71	10.41		10.3901	29.8	-0.2	5	5.8	6.1	5.4	41520.5	USB4000-VIS-RF52054	SHMSL	U1426A-2H-5A, 121.0cm		2
346	U1426	A	2	H	5	A	122	9.72	10.42		10.4001	31.4	-0.1	4.2	6.5	6.8	6.3	41520.5	USB4000-VIS-RF52054	SHMSL	U1426A-2H-5A, 122.0cm		2
346	U1426	A	2	H	5	A	123	9.73	10.43		10.4101	30.4	-0.2	5.1	6.1	6.4	5.7	41520.5	USB4000-VIS-RF52054	SHMSL	U1426A-2H-5A, 123.0cm		2
346	U1426	A	2	H	5	A	124	9.74	10.44		10.4201	29.7	0.2	5	5.8	6.1	5.4	41520.5	USB4000-VIS-RF52054	SHMSL	U1426A-2H-5A, 124.0cm		2
346	U1426	A	2	H	5	A	125	9.75	10.45		10.4301	32.3	0.1	4	6.9	7.2	6.7	41520.5	USB4000-VIS-RF52054	SHMSL	U1426A-2H-5A, 125.0cm		2
346	U1426	A	2	H	5	A	126	9.76	10.46		10.4401	29.1	-0.2	5.4	5.6	5.9	5.1	41520.5	USB4000-VIS-RF52054	SHMSL	U1426A-2H-5A, 126.0cm		2
346	U1426	A	2	H	5	A	127	9.77	10.47		10.4501	26.5	-0.1	5.7	4.7	4.9	4.1	41520.5	USB4000-VIS-RF52054	SHMSL	U1426A-2H-5A, 127.0cm		2
346	U1426	A	2	H	5	A	128	9.78	10.48		10.4601	27.1	0.1	5.1	4.9	5.1	4.5	41520.5	USB4000-VIS-RF52054	SHMSL	U1426A-2H-5A, 128.0cm		2
346	U1426	A	2	H	5	A	129	9.79	10.49		10.4701	26.9	0.3	5.3	4.8	5	4.3	41520.5	USB4000-VIS-RF52054	SHMSL	U1426A-2H-5A, 129.0cm		2
346	U1426	A	2	H	5	A	130	9.8	10.5		10.4801	25.4	0.4	6.3	4.3	4.6	3.7	41520.5	USB4000-VIS-RF52054	SHMSL	U1426A-2H-5A, 130.0cm		2
346	U1426	A	2	H	5	A	131	9.81	10.51		10.4901	24.9	0.3	5.6	4.2	4.4	3.7	41520.5	USB4000-VIS-RF52054	SHMSL	U1426A-2H-5A, 131.0cm		2
346	U1426	A	2	H	5	A	132	9.82	10.52		10.5001	24.8	0.6	6.1	4.2	4.4	3.6	41520.5	USB4000-VIS-RF52054	SHMSL	U1426A-2H-5A, 132.0cm		2
346	U1426	A	2	H	5	A	133	9.83	10.53		10.5101	25.7	0.5	5.4	4.4	4.6	3.9	41520.5	USB4000-VIS-RF52054	SHMSL	U1426A-2H-5A, 133.0cm		2
346	U1426	A	2	H	5	A	134	9.84	10.54		10.5201	25.2	0.7	5.7	4.3	4.5	3.8	41520.5	USB4000-VIS-RF52054	SHMSL	U1426A-2H-5A, 134.0cm		2
346	U1426	A	2	H	5	A	135	9.85	10.55		10.5301	26.6	0.6	4.6	4.7	4.9	4.4	41520.5	USB4000-VIS-RF52054	SHMSL	U1426A-2H-5A, 135.0cm		2
346	U1426	A	2	H	5	A	136	9.86	10.56		10.5401	24.8	0.2	4.8	4.1	4.3	3.8	41520.5	USB4000-VIS-RF52054	SHMSL	U1426A-2H-5A, 136.0cm		2
346	U1426	A	2	H	5	A	137	9.87	10.57		10.5501	25.4	0.3	5.3	4.3	4.5	3.9	41520.5	USB4000-VIS-RF52054	SHMSL	U1426A-2H-5A, 137.0cm		2
346	U1426	A	2	H	5	A	138	9.88	10.58		10.5601	25	0.5	4.8	4.2	4.4	3.8	41520.5	USB4000-VIS-RF52054	SHMSL	U1426A-2H-5A, 138.0cm		2
346	U1426	A	2	H	5	A	139	9.89	10.59		10.5701	24.2	0.7	4.4	4	4.2	3.7	41520.5	USB4000-VIS-RF52054	SHMSL	U1426A-2H-5A, 139.0cm		2
346	U1426	A	2	H	5	A	140	9.9	10.6		10.5801	24.6	0.6	4.6	4.1	4.3	3.8	41520.5	USB4000-VIS-RF52054	SHMSL	U1426A-2H-5A, 140.0cm		2
346	U1426	A	2	H	5	A	141	9.91	10.61		10.5901	24.8	0.7	5.1	4.2	4.3	3.7	41520.5	USB4000-VIS-RF52054	SHMSL	U1426A-2H-5A, 141.0cm		2
346	U1426	A	2	H	5	A	142	9.92	10.62		10.6001	25.8	0.6	5.6	4.5	4.7	3.9	41520.5	USB4000-VIS-RF52054	SHMSL	U1426A-2H-5A, 142.0cm		2
346	U1426	A	2	H	5	A	143	9.93	10.63		10.6101	26	0.7	5.4	4.6	4.8	4	41520.5	USB4000-VIS-RF52054	SHMSL	U1426A-2H-5A, 143.0cm		2
346	U1426	A	2	H	5	A	144	9.94	10.64		10.6201	26.8	0.7	6.4	4.8	5	4.1	41520.5	USB4000-VIS-RF52054	SHMSL	U1426A-2H-5A, 144.0cm		2
346	U1426	A	2	H	5	A	145	9.95	10.65		10.6301	28.4	0.6	6.3	5.4	5.6	4.7	41520.5	USB4000-VIS-RF52054	SHMSL	U1426A-2H-5A, 145.0cm		2
346	U1426	A	2	H	5	A	146	9.96	10.66		10.6401	27.9	0.6	6.6	5.2	5.4	4.4	41520.5	USB4000-VIS-RF52054	SHMSL	U1426A-2H-5A, 146.0cm		2
346	U1426	A	2	H	5	A	147	9.97	10.67		10.6501	26.1	0.7	5.4	4.6	4.8	4.1	41520.5	USB4000-VIS-RF52054	SHMSL	U1426A-2H-5A, 147.0cm		2
346	U1426	A	2	H	5	A	148	9.98	10.68		10.6601	25.9	0.3	6.4	4.5	4.7	3.8	41520.5	USB4000-VIS-RF52054	SHMSL	U1426A-2H-5A, 148.0cm		2
346	U1426	A	2	H	5	A	149	9.99	10.69		10.6701	26.4	0.3	5.5	4.6	4.9	4.1	41520.5	USB4000-VIS-RF52054	SHMSL	U1426A-2H-5A, 149.0cm		2
346	U1426	A	2	H	5	A	150	10	10.7		10.6801	31.2	0.7	2.5	6.5	6.8	6.6	41520.5	USB4000-VIS-RF52054	SHMSL	U1426A-2H-5A, 150.0cm		2
346	U1426	A	2	H	6	A	2	10.02	10.72		10.7001	25.2	0.2	5.6	4.3	4.5	3.8	41520.5	USB4000-VIS-RF52054	SHMSL	U1426A-2H-6A, 2.0cm		2
346	U1426	A	2	H	6	A	3	10.03	10.73		10.7101	26.8	0.2	5.7	4.8	5	4.2	41520.5	USB4000-VIS-RF52054	SHMSL	U1426A-2H-6A, 3.0cm		2
346	U1426	A	2	H	6	A	4	10.04	10.74		10.7201	27.4	0.3	5.5	5	5.3	4.5	41520.5	USB4000-VIS-RF52054	SHMSL	U1426A-2H-6A, 4.0cm		2
346	U1426	A	2	H	6	A	5	10.05	10.75		10.7301	30.7	0.8	3.3	6.3	6.5	6.2	41520.5	USB4000-VIS-RF52054	SHMSL	U1426A-2H-6A, 5.0cm		2
346	U1426	A	2	H	6	A	6	10.06	10.76		10.7401	27.3	0.2	5.4	5	5.2	4.5	41520.5	USB4000-VIS-RF52054	SHMSL	U1426A-2H-6A, 6.0cm		2
346	U1426	A	2	H	6	A	7	10.07	10.77		10.7501	25.8	0.3	6.5	4.5	4.7	3.8	41520.5	USB4000-VIS-RF52054	SHMSL	U1426A-2H-6A, 7.0cm		2
346	U1426	A	2	H	6	A	8	10.08	10.78		10.7601	27.8	0.5	5.6	5.2	5.4	4.6	41520.5	USB4000-VIS-RF52054	SHMSL	U1426A-2H-6A, 8.0cm		2
346	U1426	A	2	H	6	A	9	10.09	10.79		10.7701	26.7	0.2	6.3	4.8	5	4.1	41520.5	USB4000-VIS-RF52054	SHMSL	U1426A-2H-6A, 9.0cm		2
346	U1426	A	2	H	6	A	10	10.1	10.8		10.7801	27.9	0.4	5.5	5.2	5.4	4.6	41520.5	USB4000-VIS-RF52054	SHMSL	U1426A-2H-6A, 10.0cm		2
346	U1426	A	2	H	6	A	11	10.11	10.81		10.7901	28.8	0.6	4.8	5.5	5.8	5.1	41520.5	USB4000-VIS-RF52054	SHMSL	U1426A-2H-6A, 11.0cm		2
346	U1426	A	2	H	6	A	12	10.12	10.82		10.8001	26	0.5	6.6	4.5	4.7	3.8	41520.5	USB4000-VIS-RF52054	SHMSL	U1426A-2H-6A, 12.0cm		2
346	U1426	A	2	H	6	A	13	10.13	10.83		10.8101	27.7	0.4	5.9	5.1	5.3	4.5	41520.5	USB4000-VIS-RF52054	SHMSL	U1426A-2H-6A, 13.0cm		2
346	U1426	A	2	H	6	A	14	10.14	10.84		10.8201	28.3	0.4	6.2	5.3	5.6	4.6	41520.5	USB4000-VIS-RF52054	SHMSL	U1426A-2H-6A, 14.0cm		2
346	U1426	A	2	H	6	A	15	10.15	10.85		10.8301	27.6	0.3	6.3	5	5.3	4.4	41520.5	USB4000-VIS-RF52054	SHMSL	U1426A-2H-6A, 15.0cm		2
346	U1426	A	2	H	6	A	16	10.16	10.86		10.8401	27.1	0.4	5.2	4.9	5.1	4.4	41520.5	USB4000-VIS-RF52054	SHMSL	U1426A-2H-6A, 16.0cm		2
346	U1426	A	2	H	6	A	17	10.17	10.87		10.8501	25.9	0.3	6.3	4.5	4.7	3.8	41520.5	USB4000-VIS-RF52054	SHMSL	U1426A-2H-6A, 17.0cm		2
346	U1426	A	2	H	6	A	18	10.18	10.88		10.8601	25.9	0.2	7.8	4.5	4.7	3.6	41520.5	USB4000-VIS-RF52054	SHMSL	U1426A-2H-6A, 18.0cm		2
346	U1426	A	2	H	6	A	19	10.19	10.89		10.8701	26.8	0.1	6.8	4.8	5	4	41520.5	USB4000-VIS-RF52054	SHMSL	U1426A-2H-6A, 19.0cm		2
346	U1426	A	2	H	6	A	20	10.2	10.9		10.8801	28.2	0.2	6.1	5.3	5.5	4.6	41520.5	USB4000-VIS-RF52054	SHMSL	U1426A-2H-6A, 20.0cm		2
346	U1426	A	2	H	6	A	21	10.21	10.91		10.8901	27.3	0.3	7.3	5	5.2	4.1	41520.5	USB4000-VIS-RF52054	SHMSL	U1426A-2H-6A, 21.0cm		2
346	U1426	A	2	H	6	A	22	10.22	10.92		10.9001	27.6	0.3	6.4	5.1	5.3	4.4	41520.5	USB4000-VIS-RF52054	SHMSL	U1426A-2H-6A, 22.0cm		2
346	U1426	A	2	H	6	A	23	10.23	10.93		10.9101	28	0.4	5.9	5.2	5.5	4.6	41520.5	USB4000-VIS-RF52054	SHMSL	U1426A-2H-6A, 23.0cm		2
346	U1426	A	2	H	6	A	24	10.24	10.94		10.9201	26.1	0.3	6.3	4.6	4.8	3.9	41520.5	USB4000-VIS-RF52054	SHMSL	U1426A-2H-6A, 24.0cm		2
346	U1426	A	2	H	6	A	25	10.25	10.95		10.9301	26.4	0.4	6.8	4.7	4.9	3.9	41520.5	USB4000-VIS-RF52054	SHMSL	U1426A-2H-6A, 25.0cm		2
346	U1426	A	2	H	6	A	26	10.26	10.96		10.9401	22.8	0.2	5.9	3.6	3.7	3	41520.5	USB4000-VIS-RF52054	SHMSL	U1426A-2H-6A, 26.0cm		2
346	U1426	A	2	H	6	A	27	10.27	10.97		10.9501	24.9	0.2	6.6	4.2	4.4	3.5	41520.5	USB4000-VIS-RF52054	SHMSL	U1426A-2H-6A, 27.0cm		2
346	U1426	A	2	H	6	A	28	10.28	10.98		10.9601	27	0.4	5	4.8	5.1	4.4	41520.5	USB4000-VIS-RF52054	SHMSL	U1426A-2H-6A, 28.0cm		2
346	U1426	A	2	H	6	A	29	10.29	10.99		10.9701	24.5	0.4	5.7	4.1	4.3	3.6	41520.5	USB4000-VIS-RF52054	SHMSL	U1426A-2H-6A, 29.0cm		2
346	U1426	A	2	H	6	A	30	10.3	11		10.9801	24	0.2	6.3	3.9	4.1	3.3	41520.5	USB4000-VIS-RF52054	SHMSL	U1426A-2H-6A, 30.0cm		2
346	U1426	A	2	H	6	A	31	10.31	11.01		10.9901	27.3	0.2	6.6	4.9	5.2	4.2	41520.5	USB4000-VIS-RF52054	SHMSL	U1426A-2H-6A, 31.0cm		2
346	U1426	A	2	H	6	A	32	10.32	11.02		11.0001	25.5	1.2	-0.7	4.4	4.6	5.1	41520.5	USB4000-VIS-RF52054	SHMSL	U1426A-2H-6A, 32.0cm		2
346	U1426	A	2	H	6	A	33	10.33	11.03		11.0101	29	0.8	1.7	5.6	5.8	5.9	41520.5	USB4000-VIS-RF52054	SHMSL	U1426A-2H-6A, 33.0cm		2
346	U1426	A	2	H	6	A	34	10.34	11.04		11.0201	24.4	-0.1	6.1	4	4.2	3.5	41520.5	USB4000-VIS-RF52054	SHMSL	U1426A-2H-6A, 34.0cm		2
346	U1426	A	2	H	6	A	35	10.35	11.05		11.0301	22.6	0.2	3	3.5	3.7	3.4	41520.5	USB4000-VIS-RF52054	SHMSL	U1426A-2H-6A, 35.0cm		2
346	U1426	A	2	H	6	A	36	10.36	11.06		11.0401	26.1	0	5.4	4.5	4.8	4.1	41520.5	USB4000-VIS-RF52054	SHMSL	U1426A-2H-6A, 36.0cm		2
346	U1426	A	2	H	6	A	37	10.37	11.07		11.0501	25.5	-0.1	5.8	4.3	4.6	3.8	41520.5	USB4000-VIS-RF52054	SHMSL	U1426A-2H-6A, 37.0cm		2
346	U1426	A	2	H	6	A	38	10.38	11.08		11.0601	26	0.1	5.3	4.5	4.7	4	41520.5	USB4000-VIS-RF52054	SHMSL	U1426A-2H-6A, 38.0cm		2
346	U1426	A	2	H	6	A	39	10.39	11.09		11.0701	26.7	0.4	3.8	4.8	5	4.6	41520.5	USB4000-VIS-RF52054	SHMSL	U1426A-2H-6A, 39.0cm		2
346	U1426	A	2	H	6	A	40	10.4	11.1		11.0801	27.2	0.1	4.6	4.9	5.2	4.6	41520.5	USB4000-VIS-RF52054	SHMSL	U1426A-2H-6A, 40.0cm		2
346	U1426	A	2	H	6	A	41	10.41	11.11		11.0901	27.1	0.1	4.3	4.9	5.1	4.6	41520.5	USB4000-VIS-RF52054	SHMSL	U1426A-2H-6A, 41.0cm		2
346	U1426	A	2	H	6	A	42	10.42	11.12		11.1001	26.2	-0.1	5.7	4.6	4.8	4	41520.5	USB4000-VIS-RF52054	SHMSL	U1426A-2H-6A, 42.0cm		2
346	U1426	A	2	H	6	A	43	10.43	11.13		11.1101	27.5	-0.1	5.2	5	5.3	4.6	41520.5	USB4000-VIS-RF52054	SHMSL	U1426A-2H-6A, 43.0cm		2
346	U1426	A	2	H	6	A	44	10.44	11.14		11.1201	26.5	-0.1	5	4.7	4.9	4.3	41520.5	USB4000-VIS-RF52054	SHMSL	U1426A-2H-6A, 44.0cm		2
346	U1426	A	2	H	6	A	45	10.45	11.15		11.1301	27.2	-0.1	4.6	4.9	5.2	4.6	41520.5	USB4000-VIS-RF52054	SHMSL	U1426A-2H-6A, 45.0cm		2
346	U1426	A	2	H	6	A	46	10.46	11.16		11.1401	29.3	0.3	3	5.7	6	5.7	41520.5	USB4000-VIS-RF52054	SHMSL	U1426A-2H-6A, 46.0cm		2
346	U1426	A	2	H	6	A	47	10.47	11.17		11.1501	27.1	0	4.4	4.9	5.1	4.6	41520.5	USB4000-VIS-RF52054	SHMSL	U1426A-2H-6A, 47.0cm		2
346	U1426	A	2	H	6	A	48	10.48	11.18		11.1601	26.8	0	3.8	4.8	5	4.6	41520.5	USB4000-VIS-RF52054	SHMSL	U1426A-2H-6A, 48.0cm		2
346	U1426	A	2	H	6	A	49	10.49	11.19		11.1701	27.5	-0.1	4.1	5	5.3	4.8	41520.5	USB4000-VIS-RF52054	SHMSL	U1426A-2H-6A, 49.0cm		2
346	U1426	A	2	H	6	A	50	10.5	11.2		11.1801	28.9	0.2	2.4	5.5	5.8	5.7	41520.5	USB4000-VIS-RF52054	SHMSL	U1426A-2H-6A, 50.0cm		2
346	U1426	A	2	H	6	A	51	10.51	11.21		11.1901	29	0.2	2.6	5.5	5.8	5.7	41520.5	USB4000-VIS-RF52054	SHMSL	U1426A-2H-6A, 51.0cm		2
346	U1426	A	2	H	6	A	52	10.52	11.22		11.2001	27.4	-0.3	4.7	5	5.3	4.6	41520.5	USB4000-VIS-RF52054	SHMSL	U1426A-2H-6A, 52.0cm		2
346	U1426	A	2	H	6	A	53	10.53	11.23		11.2101	27.9	-0.2	4.6	5.1	5.4	4.8	41520.5	USB4000-VIS-RF52054	SHMSL	U1426A-2H-6A, 53.0cm		2
346	U1426	A	2	H	6	A	54	10.54	11.24		11.2201	28	-0.1	4.3	5.2	5.5	4.9	41520.5	USB4000-VIS-RF52054	SHMSL	U1426A-2H-6A, 54.0cm		2
346	U1426	A	2	H	6	A	55	10.55	11.25		11.2301	27.9	0	4.2	5.1	5.4	4.9	41520.5	USB4000-VIS-RF52054	SHMSL	U1426A-2H-6A, 55.0cm		2
346	U1426	A	2	H	6	A	56	10.56	11.26		11.2401	28.3	-0.1	4.3	5.3	5.6	5	41520.5	USB4000-VIS-RF52054	SHMSL	U1426A-2H-6A, 56.0cm		2
346	U1426	A	2	H	6	A	57	10.57	11.27		11.2501	27.9	-0.1	4.1	5.1	5.4	4.9	41520.5	USB4000-VIS-RF52054	SHMSL	U1426A-2H-6A, 57.0cm		2
346	U1426	A	2	H	6	A	58	10.58	11.28		11.2601	27.9	-0.1	4.2	5.1	5.4	4.9	41520.5	USB4000-VIS-RF52054	SHMSL	U1426A-2H-6A, 58.0cm		2
346	U1426	A	2	H	6	A	59	10.59	11.29		11.2701	27.3	-0.3	4.9	4.9	5.2	4.6	41520.5	USB4000-VIS-RF52054	SHMSL	U1426A-2H-6A, 59.0cm		2
346	U1426	C	2	H	4	A	6	11.06	11.312		11.292	30.1	0.1	2	6	6.3	6.3	41523	USB4000-VIS-RF52054	SHMSL	U1426C-2H-4A, 6.0cm		3
346	U1426	C	2	H	4	A	8	11.08	11.332		11.312	29.4	-0.2	2.8	5.7	6	5.8	41523	USB4000-VIS-RF52054	SHMSL	U1426C-2H-4A, 8.0cm		3
346	U1426	C	2	H	4	A	10	11.1	11.352		11.332	29.1	-0.2	2.9	5.6	5.9	5.6	41523	USB4000-VIS-RF52054	SHMSL	U1426C-2H-4A, 10.0cm		3
346	U1426	C	2	H	4	A	12	11.12	11.372		11.352	30.6	-0.1	2.9	6.1	6.5	6.2	41523	USB4000-VIS-RF52054	SHMSL	U1426C-2H-4A, 12.0cm		3
346	U1426	C	2	H	4	A	14	11.14	11.392		11.372	29.2	-0.2	3.4	5.6	5.9	5.6	41523	USB4000-VIS-RF52054	SHMSL	U1426C-2H-4A, 14.0cm		3
346	U1426	C	2	H	4	A	16	11.16	11.412		11.392	29.5	-0.1	3.4	5.7	6	5.7	41523	USB4000-VIS-RF52054	SHMSL	U1426C-2H-4A, 16.0cm		3
346	U1426	C	2	H	4	A	18	11.18	11.432		11.412	30.1	-0.1	2.8	5.9	6.3	6.1	41523	USB4000-VIS-RF52054	SHMSL	U1426C-2H-4A, 18.0cm		3
346	U1426	C	2	H	4	A	20	11.2	11.452		11.432	29.2	-0.3	4.1	5.6	5.9	5.4	41523	USB4000-VIS-RF52054	SHMSL	U1426C-2H-4A, 20.0cm		3
346	U1426	C	2	H	4	A	22	11.22	11.472		11.452	28.5	-0.1	2.9	5.3	5.6	5.4	41523	USB4000-VIS-RF52054	SHMSL	U1426C-2H-4A, 22.0cm		3
346	U1426	C	2	H	4	A	24	11.24	11.492		11.472	29	0	2.5	5.5	5.8	5.7	41523	USB4000-VIS-RF52054	SHMSL	U1426C-2H-4A, 24.0cm		3
346	U1426	C	2	H	4	A	26	11.26	11.512		11.492	27.1	0	3.1	4.9	5.1	4.8	41523	USB4000-VIS-RF52054	SHMSL	U1426C-2H-4A, 26.0cm		3
346	U1426	C	2	H	4	A	28	11.28	11.532		11.512	27.9	0.3	2.9	5.1	5.4	5.2	41523	USB4000-VIS-RF52054	SHMSL	U1426C-2H-4A, 28.0cm		3
346	U1426	C	2	H	4	A	30	11.3	11.552		11.532	30.4	0.6	0.6	6.1	6.4	6.7	41523	USB4000-VIS-RF52054	SHMSL	U1426C-2H-4A, 30.0cm		3
346	U1426	C	2	H	4	A	32	11.32	11.572		11.552	27.1	0.1	3.3	4.9	5.1	4.8	41523	USB4000-VIS-RF52054	SHMSL	U1426C-2H-4A, 32.0cm		3
346	U1426	C	2	H	4	A	34	11.34	11.592		11.572	26.2	-0.1	4.4	4.6	4.8	4.3	41523	USB4000-VIS-RF52054	SHMSL	U1426C-2H-4A, 34.0cm		3
346	U1426	C	2	H	4	A	36	11.36	11.612		11.592	26.4	0.2	3.1	4.7	4.9	4.6	41523	USB4000-VIS-RF52054	SHMSL	U1426C-2H-4A, 36.0cm		3
346	U1426	C	2	H	4	A	38	11.38	11.632		11.612	29.5	0.5	1.9	5.8	6	6	41523	USB4000-VIS-RF52054	SHMSL	U1426C-2H-4A, 38.0cm		3
346	U1426	C	2	H	4	A	40	11.4	11.652		11.632	27.6	0.2	2.6	5.1	5.3	5.1	41523	USB4000-VIS-RF52054	SHMSL	U1426C-2H-4A, 40.0cm		3
346	U1426	C	2	H	4	A	42	11.42	11.672		11.652	28.4	0.2	2.5	5.3	5.6	5.4	41523	USB4000-VIS-RF52054	SHMSL	U1426C-2H-4A, 42.0cm		3
346	U1426	C	2	H	4	A	44	11.44	11.692		11.672	27.1	0.2	2.8	4.9	5.1	4.9	41523	USB4000-VIS-RF52054	SHMSL	U1426C-2H-4A, 44.0cm		3
346	U1426	C	2	H	4	A	46	11.46	11.712		11.692	27.2	0	3.7	4.9	5.2	4.8	41523	USB4000-VIS-RF52054	SHMSL	U1426C-2H-4A, 46.0cm		3
346	U1426	C	2	H	4	A	48	11.48	11.732		11.712	28.1	0	3.1	5.2	5.5	5.2	41523	USB4000-VIS-RF52054	SHMSL	U1426C-2H-4A, 48.0cm		3
346	U1426	C	2	H	4	A	50	11.5	11.752		11.732	28.4	-0.1	3.1	5.3	5.6	5.3	41523	USB4000-VIS-RF52054	SHMSL	U1426C-2H-4A, 50.0cm		3
346	U1426	C	2	H	4	A	52	11.52	11.772		11.752	29.1	0.3	1.9	5.6	5.9	5.9	41523	USB4000-VIS-RF52054	SHMSL	U1426C-2H-4A, 52.0cm		3
346	U1426	C	2	H	4	A	54	11.54	11.792		11.772	27.4	0.2	2.8	5	5.2	5	41523	USB4000-VIS-RF52054	SHMSL	U1426C-2H-4A, 54.0cm		3
346	U1426	C	2	H	4	A	56	11.56	11.812		11.792	35	1.1	-1.1	8.2	8.5	9.5	41523	USB4000-VIS-RF52054	SHMSL	U1426C-2H-4A, 56.0cm		3
346	U1426	C	2	H	4	A	58	11.58	11.832		11.812	34.1	0.9	0	7.7	8.1	8.7	41523	USB4000-VIS-RF52054	SHMSL	U1426C-2H-4A, 58.0cm		3
346	U1426	C	2	H	4	A	60	11.6	11.852		11.832	25.8	0.2	4.4	4.4	4.7	4.2	41523	USB4000-VIS-RF52054	SHMSL	U1426C-2H-4A, 60.0cm		3
346	U1426	C	2	H	4	A	62	11.62	11.872		11.852	28	0.1	3	5.2	5.5	5.2	41523	USB4000-VIS-RF52054	SHMSL	U1426C-2H-4A, 62.0cm		3
346	U1426	C	2	H	4	A	64	11.64	11.892		11.872	30.9	-0.3	3.2	6.3	6.6	6.3	41523	USB4000-VIS-RF52054	SHMSL	U1426C-2H-4A, 64.0cm		3
346	U1426	C	2	H	4	A	66	11.66	11.912		11.892	32.3	0	1.9	6.9	7.2	7.2	41523	USB4000-VIS-RF52054	SHMSL	U1426C-2H-4A, 66.0cm		3
346	U1426	C	2	H	4	A	68	11.68	11.932		11.912	34.6	-0.1	1.3	7.8	8.3	8.5	41523	USB4000-VIS-RF52054	SHMSL	U1426C-2H-4A, 68.0cm		3
346	U1426	C	2	H	4	A	70	11.7	11.952		11.932	34.3	0	1.4	7.7	8.1	8.3	41523	USB4000-VIS-RF52054	SHMSL	U1426C-2H-4A, 70.0cm		3
346	U1426	C	2	H	4	A	72	11.72	11.972		11.952	33.2	-0.5	2.2	7.2	7.6	7.6	41523	USB4000-VIS-RF52054	SHMSL	U1426C-2H-4A, 72.0cm		3
346	U1426	C	2	H	4	A	74	11.74	11.992		11.972	34.9	-0.4	1.7	8	8.5	8.6	41523	USB4000-VIS-RF52054	SHMSL	U1426C-2H-4A, 74.0cm		3
346	U1426	C	2	H	4	A	76	11.76	12.012		11.992	34.1	-0.4	1.6	7.6	8.1	8.2	41523	USB4000-VIS-RF52054	SHMSL	U1426C-2H-4A, 76.0cm		3
346	U1426	C	2	H	4	A	78	11.78	12.032		12.012	34.2	-0.3	1.5	7.6	8.1	8.2	41523	USB4000-VIS-RF52054	SHMSL	U1426C-2H-4A, 78.0cm		3
346	U1426	C	2	H	4	A	80	11.8	12.052		12.032	34.8	-0.4	1.2	7.9	8.4	8.7	41523	USB4000-VIS-RF52054	SHMSL	U1426C-2H-4A, 80.0cm		3
346	U1426	C	2	H	4	A	82	11.82	12.072		12.052	34.5	-0.2	1	7.8	8.3	8.6	41523	USB4000-VIS-RF52054	SHMSL	U1426C-2H-4A, 82.0cm		3
346	U1426	C	2	H	4	A	84	11.84	12.092		12.072	34.3	0.1	0.8	7.7	8.2	8.5	41523	USB4000-VIS-RF52054	SHMSL	U1426C-2H-4A, 84.0cm		3
346	U1426	C	2	H	4	A	86	11.86	12.112		12.092	31.9	0.1	1.1	6.7	7	7.3	41523	USB4000-VIS-RF52054	SHMSL	U1426C-2H-4A, 86.0cm		3
346	U1426	C	2	H	4	A	88	11.88	12.132		12.112	31.3	0.1	1.5	6.4	6.8	6.9	41523	USB4000-VIS-RF52054	SHMSL	U1426C-2H-4A, 88.0cm		3
346	U1426	C	2	H	4	A	90	11.9	12.152		12.132	29.4	0	2.6	5.7	6	5.8	41523	USB4000-VIS-RF52054	SHMSL	U1426C-2H-4A, 90.0cm		3
346	U1426	C	2	H	4	A	92	11.92	12.172		12.152	30.6	0.5	1.1	6.2	6.5	6.7	41523	USB4000-VIS-RF52054	SHMSL	U1426C-2H-4A, 92.0cm		3
346	U1426	C	2	H	4	A	94	11.94	12.192		12.172	29.9	0.6	1.1	5.9	6.2	6.4	41523	USB4000-VIS-RF52054	SHMSL	U1426C-2H-4A, 94.0cm		3
346	U1426	C	2	H	4	A	96	11.96	12.212		12.192	26.6	0.3	2.5	4.7	4.9	4.8	41523	USB4000-VIS-RF52054	SHMSL	U1426C-2H-4A, 96.0cm		3
346	U1426	C	2	H	4	A	98	11.98	12.232		12.212	29.9	0.4	1.2	5.9	6.2	6.4	41523	USB4000-VIS-RF52054	SHMSL	U1426C-2H-4A, 98.0cm		3
346	U1426	C	2	H	4	A	100	12	12.252		12.232	27.9	0.1	2.5	5.1	5.4	5.3	41523	USB4000-VIS-RF52054	SHMSL	U1426C-2H-4A, 100.0cm		3
346	U1426	C	2	H	4	A	102	12.02	12.272		12.252	26.8	0.4	2.5	4.8	5	4.9	41523	USB4000-VIS-RF52054	SHMSL	U1426C-2H-4A, 102.0cm		3
346	U1426	C	2	H	4	A	104	12.04	12.292		12.272	25.6	0.6	2.6	4.4	4.6	4.4	41523	USB4000-VIS-RF52054	SHMSL	U1426C-2H-4A, 104.0cm		3
346	U1426	C	2	H	4	A	106	12.06	12.312		12.292	26.3	0.5	2.9	4.6	4.9	4.6	41523	USB4000-VIS-RF52054	SHMSL	U1426C-2H-4A, 106.0cm		3
346	U1426	C	2	H	4	A	108	12.08	12.332		12.312	26.4	0.7	2.6	4.7	4.9	4.7	41523	USB4000-VIS-RF52054	SHMSL	U1426C-2H-4A, 108.0cm		3
346	U1426	C	2	H	4	A	110	12.1	12.352		12.332	27.7	0.6	3.5	5.1	5.3	5	41523	USB4000-VIS-RF52054	SHMSL	U1426C-2H-4A, 110.0cm		3
346	U1426	C	2	H	4	A	112	12.12	12.372		12.352	30.2	0	4.1	6	6.3	5.8	41523	USB4000-VIS-RF52054	SHMSL	U1426C-2H-4A, 112.0cm		3
346	U1426	C	2	H	4	A	114	12.14	12.392		12.372	31.9	-0.4	4.2	6.6	7	6.4	41523	USB4000-VIS-RF52054	SHMSL	U1426C-2H-4A, 114.0cm		3
346	U1426	C	2	H	4	A	116	12.16	12.412		12.392	31.3	-0.3	4.7	6.4	6.8	6.1	41523	USB4000-VIS-RF52054	SHMSL	U1426C-2H-4A, 116.0cm		3
346	U1426	C	2	H	4	A	118	12.18	12.432		12.412	32.9	-0.5	3.6	7	7.5	7.1	41523	USB4000-VIS-RF52054	SHMSL	U1426C-2H-4A, 118.0cm		3
346	U1426	C	2	H	4	A	120	12.2	12.452		12.432	33.5	-0.3	4.2	7.4	7.8	7.2	41523	USB4000-VIS-RF52054	SHMSL	U1426C-2H-4A, 120.0cm		3
346	U1426	C	2	H	4	A	122	12.22	12.472		12.452	33.5	-0.5	4.8	7.3	7.8	7	41523	USB4000-VIS-RF52054	SHMSL	U1426C-2H-4A, 122.0cm		3
346	U1426	C	2	H	4	A	124	12.24	12.492		12.472	34.4	-0.4	4	7.7	8.2	7.6	41523	USB4000-VIS-RF52054	SHMSL	U1426C-2H-4A, 124.0cm		3
346	U1426	C	2	H	4	A	126	12.26	12.512		12.492	33.6	-0.4	4.2	7.4	7.8	7.2	41523	USB4000-VIS-RF52054	SHMSL	U1426C-2H-4A, 126.0cm		3
346	U1426	C	2	H	4	A	128	12.28	12.532		12.512	34.7	-0.2	3.4	7.9	8.3	7.9	41523	USB4000-VIS-RF52054	SHMSL	U1426C-2H-4A, 128.0cm		3
346	U1426	C	2	H	4	A	130	12.3	12.552		12.532	33.4	-0.5	4	7.3	7.7	7.2	41523	USB4000-VIS-RF52054	SHMSL	U1426C-2H-4A, 130.0cm		3
346	U1426	C	2	H	4	A	132	12.32	12.572		12.552	33.5	-0.3	4.6	7.3	7.8	7.1	41523	USB4000-VIS-RF52054	SHMSL	U1426C-2H-4A, 132.0cm		3
346	U1426	C	2	H	4	A	134	12.34	12.592		12.572	34.4	-0.2	4.1	7.8	8.2	7.6	41523	USB4000-VIS-RF52054	SHMSL	U1426C-2H-4A, 134.0cm		3
346	U1426	C	2	H	4	A	136	12.36	12.612		12.592	30.3	-0.3	5	6	6.4	5.6	41523	USB4000-VIS-RF52054	SHMSL	U1426C-2H-4A, 136.0cm		3
346	U1426	C	2	H	4	A	138	12.38	12.632		12.612	29.8	0.1	4.3	5.8	6.1	5.6	41523	USB4000-VIS-RF52054	SHMSL	U1426C-2H-4A, 138.0cm		3
346	U1426	C	2	H	4	A	140	12.4	12.652		12.632	34.2	-0.3	4.3	7.6	8.1	7.5	41523	USB4000-VIS-RF52054	SHMSL	U1426C-2H-4A, 140.0cm		3
346	U1426	C	2	H	4	A	142	12.42	12.672		12.652	33.1	0.2	3.4	7.2	7.6	7.2	41523	USB4000-VIS-RF52054	SHMSL	U1426C-2H-4A, 142.0cm		3
346	U1426	C	2	H	4	A	144	12.44	12.692		12.672	35.4	1.1	-0.2	8.4	8.7	9.4	41523	USB4000-VIS-RF52054	SHMSL	U1426C-2H-4A, 144.0cm		3
346	U1426	C	2	H	4	A	146	12.46	12.712		12.692	31.6	0.8	1.7	6.6	6.9	7	41523	USB4000-VIS-RF52054	SHMSL	U1426C-2H-4A, 146.0cm		3
346	U1426	C	2	H	4	A	148	12.48	12.732		12.712	30.1	0.4	1.3	6	6.3	6.4	41523	USB4000-VIS-RF52054	SHMSL	U1426C-2H-4A, 148.0cm		3
346	U1426	C	2	H	4	A	150	12.5	12.752		12.732	32.1	1.4	-1.4	6.9	7.1	8	41523	USB4000-VIS-RF52054	SHMSL	U1426C-2H-4A, 150.0cm		3
346	U1426	C	2	H	5	A	2	12.52	12.772		12.752	34.8	1.5	-0.7	8.1	8.4	9.2	41523	USB4000-VIS-RF52054	SHMSL	U1426C-2H-5A, 2.0cm		3
346	U1426	C	2	H	5	A	4	12.54	12.792		12.772	28	1	1.6	5.2	5.4	5.5	41523	USB4000-VIS-RF52054	SHMSL	U1426C-2H-5A, 4.0cm		3
346	U1426	C	2	H	5	A	6	12.56	12.812		12.792	26.6	0.9	4	4.8	5	4.5	41523	USB4000-VIS-RF52054	SHMSL	U1426C-2H-5A, 6.0cm		3
346	U1426	C	2	H	5	A	8	12.58	12.832		12.812	27.7	0.7	3.8	5.1	5.3	4.9	41523	USB4000-VIS-RF52054	SHMSL	U1426C-2H-5A, 8.0cm		3
346	U1426	C	2	H	5	A	10	12.6	12.852		12.832	26.6	0.7	4.2	4.8	5	4.5	41523	USB4000-VIS-RF52054	SHMSL	U1426C-2H-5A, 10.0cm		3
346	U1426	C	2	H	5	A	12	12.62	12.872		12.852	27.5	0.7	4	5	5.3	4.8	41523	USB4000-VIS-RF52054	SHMSL	U1426C-2H-5A, 12.0cm		3
346	U1426	C	2	H	5	A	14	12.64	12.892		12.872	27.4	0.8	4.7	5	5.2	4.6	41523	USB4000-VIS-RF52054	SHMSL	U1426C-2H-5A, 14.0cm		3
346	U1426	C	2	H	5	A	16	12.66	12.912		12.892	28.3	0.9	4.6	5.3	5.6	4.9	41523	USB4000-VIS-RF52054	SHMSL	U1426C-2H-5A, 16.0cm		3
346	U1426	C	2	H	5	A	18	12.68	12.932		12.912	30	1	5.8	6	6.2	5.3	41523	USB4000-VIS-RF52054	SHMSL	U1426C-2H-5A, 18.0cm		3
346	U1426	C	2	H	5	A	20	12.7	12.952		12.932	31.2	0.9	7	6.5	6.7	5.5	41523	USB4000-VIS-RF52054	SHMSL	U1426C-2H-5A, 20.0cm		3
346	U1426	C	2	H	5	A	22	12.72	12.972		12.952	28.6	1	6.3	5.5	5.7	4.7	41523	USB4000-VIS-RF52054	SHMSL	U1426C-2H-5A, 22.0cm		3
346	U1426	C	2	H	5	A	24	12.74	12.992		12.972	28.6	0.9	5.5	5.5	5.7	4.9	41523	USB4000-VIS-RF52054	SHMSL	U1426C-2H-5A, 24.0cm		3
346	U1426	C	2	H	5	A	26	12.76	13.012		12.992	28.4	1.1	5.9	5.4	5.6	4.7	41523	USB4000-VIS-RF52054	SHMSL	U1426C-2H-5A, 26.0cm		3
346	U1426	C	2	H	5	A	28	12.78	13.032		13.012	27.1	0.3	5.4	4.9	5.1	4.4	41523	USB4000-VIS-RF52054	SHMSL	U1426C-2H-5A, 28.0cm		3
346	U1426	C	2	H	5	A	30	12.8	13.052		13.032	27.7	0.3	5.4	5.1	5.3	4.6	41523	USB4000-VIS-RF52054	SHMSL	U1426C-2H-5A, 30.0cm		3
346	U1426	C	2	H	5	A	32	12.82	13.072		13.052	27.7	0.3	5.4	5.1	5.4	4.6	41523	USB4000-VIS-RF52054	SHMSL	U1426C-2H-5A, 32.0cm		3
346	U1426	C	2	H	5	A	34	12.84	13.092		13.072	28.2	0.2	5.2	5.3	5.5	4.8	41523	USB4000-VIS-RF52054	SHMSL	U1426C-2H-5A, 34.0cm		3
346	U1426	C	2	H	5	A	36	12.86	13.112		13.092	28.6	0.1	5	5.4	5.7	5	41523	USB4000-VIS-RF52054	SHMSL	U1426C-2H-5A, 36.0cm		3
346	U1426	C	2	H	5	A	38	12.88	13.132		13.112	29.2	0.2	4.8	5.6	5.9	5.2	41523	USB4000-VIS-RF52054	SHMSL	U1426C-2H-5A, 38.0cm		3
346	U1426	C	2	H	5	A	40	12.9	13.152		13.132	28.7	-0.1	5.5	5.4	5.7	4.9	41523	USB4000-VIS-RF52054	SHMSL	U1426C-2H-5A, 40.0cm		3
346	U1426	C	2	H	5	A	42	12.92	13.172		13.152	28.7	-0.2	5.6	5.4	5.7	4.9	41523	USB4000-VIS-RF52054	SHMSL	U1426C-2H-5A, 42.0cm		3
346	U1426	C	2	H	5	A	44	12.94	13.192		13.172	30.6	0.2	3.4	6.2	6.5	6.1	41523	USB4000-VIS-RF52054	SHMSL	U1426C-2H-5A, 44.0cm		3
346	U1426	C	2	H	5	A	46	12.96	13.212		13.192	30.3	-0.2	5.1	6	6.4	5.6	41523	USB4000-VIS-RF52054	SHMSL	U1426C-2H-5A, 46.0cm		3
346	U1426	C	2	H	5	A	48	12.98	13.232		13.212	30.7	-0.3	5	6.2	6.5	5.8	41523	USB4000-VIS-RF52054	SHMSL	U1426C-2H-5A, 48.0cm		3
346	U1426	C	2	H	5	A	50	13	13.252		13.232	30.2	-0.3	5.3	5.9	6.3	5.5	41523	USB4000-VIS-RF52054	SHMSL	U1426C-2H-5A, 50.0cm		3
346	U1426	C	2	H	5	A	52	13.02	13.272		13.252	29.7	-0.3	5.5	5.8	6.1	5.3	41523	USB4000-VIS-RF52054	SHMSL	U1426C-2H-5A, 52.0cm		3
346	U1426	C	2	H	5	A	54	13.04	13.292		13.272	31.8	-0.4	5.4	6.6	7	6.1	41523	USB4000-VIS-RF52054	SHMSL	U1426C-2H-5A, 54.0cm		3
346	U1426	C	2	H	5	A	56	13.06	13.312		13.292	31	-0.3	4.5	6.3	6.7	6	41523	USB4000-VIS-RF52054	SHMSL	U1426C-2H-5A, 56.0cm		3
346	U1426	C	2	H	5	A	58	13.08	13.332		13.312	31.6	-0.3	5	6.5	6.9	6.1	41523	USB4000-VIS-RF52054	SHMSL	U1426C-2H-5A, 58.0cm		3
346	U1426	C	2	H	5	A	60	13.1	13.352		13.332	33.1	-0.7	4.7	7.1	7.6	6.9	41523	USB4000-VIS-RF52054	SHMSL	U1426C-2H-5A, 60.0cm		3
346	U1426	C	2	H	5	A	62	13.12	13.372		13.352	33.4	-0.8	4.5	7.2	7.7	7	41523	USB4000-VIS-RF52054	SHMSL	U1426C-2H-5A, 62.0cm		3
346	U1426	C	2	H	5	A	64	13.14	13.392		13.372	33.9	-0.7	4.5	7.5	8	7.3	41523	USB4000-VIS-RF52054	SHMSL	U1426C-2H-5A, 64.0cm		3
346	U1426	C	2	H	5	A	66	13.16	13.412		13.392	34.4	-0.5	4.1	7.7	8.2	7.7	41523	USB4000-VIS-RF52054	SHMSL	U1426C-2H-5A, 66.0cm		3
346	U1426	C	2	H	5	A	68	13.18	13.432		13.412	34.1	-0.7	4.1	7.6	8	7.5	41523	USB4000-VIS-RF52054	SHMSL	U1426C-2H-5A, 68.0cm		3
346	U1426	C	2	H	5	A	70	13.2	13.452		13.432	33.8	-0.8	4.3	7.4	7.9	7.3	41523	USB4000-VIS-RF52054	SHMSL	U1426C-2H-5A, 70.0cm		3
346	U1426	C	2	H	5	A	72	13.22	13.472		13.452	36.5	-1	3.2	8.7	9.3	8.9	41523	USB4000-VIS-RF52054	SHMSL	U1426C-2H-5A, 72.0cm		3
346	U1426	C	2	H	5	A	74	13.24	13.492		13.472	35.8	-0.9	3	8.4	8.9	8.6	41523	USB4000-VIS-RF52054	SHMSL	U1426C-2H-5A, 74.0cm		3
346	U1426	C	2	H	5	A	76	13.26	13.512		13.492	35.7	-0.8	3.8	8.3	8.8	8.3	41523	USB4000-VIS-RF52054	SHMSL	U1426C-2H-5A, 76.0cm		3
346	U1426	C	2	H	5	A	78	13.28	13.532		13.512	36.3	-0.9	4.2	8.6	9.2	8.6	41523	USB4000-VIS-RF52054	SHMSL	U1426C-2H-5A, 78.0cm		3
346	U1426	C	2	H	5	A	80	13.3	13.552		13.532	38.2	-0.7	2.5	9.6	10.2	10.1	41523	USB4000-VIS-RF52054	SHMSL	U1426C-2H-5A, 80.0cm		3
346	U1426	C	2	H	5	A	82	13.32	13.572		13.552	37.6	-0.6	2.4	9.3	9.9	9.8	41523	USB4000-VIS-RF52054	SHMSL	U1426C-2H-5A, 82.0cm		3
346	U1426	C	2	H	5	A	84	13.34	13.592		13.572	37.1	-0.8	4.1	9	9.6	9	41523	USB4000-VIS-RF52054	SHMSL	U1426C-2H-5A, 84.0cm		3
346	U1426	C	2	H	5	A	86	13.36	13.612		13.592	38.1	-0.7	3.7	9.5	10.2	9.7	41523	USB4000-VIS-RF52054	SHMSL	U1426C-2H-5A, 86.0cm		3
346	U1426	C	2	H	5	A	88	13.38	13.632		13.612	38.3	-0.8	3.6	9.6	10.3	9.8	41523	USB4000-VIS-RF52054	SHMSL	U1426C-2H-5A, 88.0cm		3
346	U1426	C	2	H	5	A	90	13.4	13.652		13.632	38.9	-0.7	3.3	9.9	10.6	10.2	41523	USB4000-VIS-RF52054	SHMSL	U1426C-2H-5A, 90.0cm		3
346	U1426	C	2	H	5	A	92	13.42	13.672		13.652	38	-0.7	3	9.5	10.1	9.8	41523	USB4000-VIS-RF52054	SHMSL	U1426C-2H-5A, 92.0cm		3
346	U1426	C	2	H	5	A	94	13.44	13.692		13.672	40.1	-0.5	2.8	10.7	11.3	11.2	41523	USB4000-VIS-RF52054	SHMSL	U1426C-2H-5A, 94.0cm		3
346	U1426	C	2	H	5	A	96	13.46	13.712		13.692	38.9	-0.6	3.5	10	10.6	10.1	41523	USB4000-VIS-RF52054	SHMSL	U1426C-2H-5A, 96.0cm		3
346	U1426	C	2	H	5	A	98	13.48	13.732		13.712	39.9	-0.5	3.2	10.5	11.2	10.8	41523	USB4000-VIS-RF52054	SHMSL	U1426C-2H-5A, 98.0cm		3
346	U1426	C	2	H	5	A	100	13.5	13.752		13.732	39.2	-0.8	4.1	10.1	10.8	10.1	41523	USB4000-VIS-RF52054	SHMSL	U1426C-2H-5A, 100.0cm		3
346	U1426	C	2	H	5	A	102	13.52	13.772		13.752	38.3	-0.7	4.4	9.6	10.3	9.5	41523	USB4000-VIS-RF52054	SHMSL	U1426C-2H-5A, 102.0cm		3
346	U1426	C	2	H	5	A	104	13.54	13.792		13.772	37.2	-0.4	4.1	9.1	9.7	9	41523	USB4000-VIS-RF52054	SHMSL	U1426C-2H-5A, 104.0cm		3
346	U1426	C	2	H	5	A	106	13.56	13.812		13.792	39	-0.6	4.3	10	10.7	10	41523	USB4000-VIS-RF52054	SHMSL	U1426C-2H-5A, 106.0cm		3
346	U1426	C	2	H	5	A	108	13.58	13.832		13.812	37.9	-0.2	3.7	9.5	10	9.5	41523	USB4000-VIS-RF52054	SHMSL	U1426C-2H-5A, 108.0cm		3
346	U1426	C	2	H	5	A	110	13.6	13.852		13.832	36.6	-0.3	4.5	8.8	9.3	8.6	41523	USB4000-VIS-RF52054	SHMSL	U1426C-2H-5A, 110.0cm		3
346	U1426	C	2	H	5	A	112	13.62	13.872		13.852	34.5	-0.3	4.4	7.8	8.3	7.6	41523	USB4000-VIS-RF52054	SHMSL	U1426C-2H-5A, 112.0cm		3
346	U1426	C	2	H	5	A	114	13.64	13.892		13.872	35.7	-0.3	4.7	8.4	8.9	8.1	41523	USB4000-VIS-RF52054	SHMSL	U1426C-2H-5A, 114.0cm		3
346	U1426	C	2	H	5	A	116	13.66	13.912		13.892	34.2	-0.1	3	7.7	8.1	7.8	41523	USB4000-VIS-RF52054	SHMSL	U1426C-2H-5A, 116.0cm		3
346	U1426	C	2	H	5	A	118	13.68	13.932		13.912	32.9	-0.3	3.8	7.1	7.5	7	41523	USB4000-VIS-RF52054	SHMSL	U1426C-2H-5A, 118.0cm		3
346	U1426	C	2	H	5	A	120	13.7	13.952		13.932	32.7	-0.1	4.2	7	7.4	6.8	41523	USB4000-VIS-RF52054	SHMSL	U1426C-2H-5A, 120.0cm		3
346	U1426	C	2	H	5	A	122	13.72	13.972		13.952	32.5	-0.1	4.4	6.9	7.3	6.7	41523	USB4000-VIS-RF52054	SHMSL	U1426C-2H-5A, 122.0cm		3
346	U1426	C	2	H	5	A	124	13.74	13.992		13.972	34.5	-0.3	4.6	7.8	8.3	7.5	41523	USB4000-VIS-RF52054	SHMSL	U1426C-2H-5A, 124.0cm		3
346	U1426	C	2	H	5	A	126	13.76	14.012		13.992	35.8	-0.2	4.2	8.4	8.9	8.3	41523	USB4000-VIS-RF52054	SHMSL	U1426C-2H-5A, 126.0cm		3
346	U1426	C	2	H	5	A	128	13.78	14.032		14.012	35.8	-0.2	3.9	8.4	8.9	8.3	41523	USB4000-VIS-RF52054	SHMSL	U1426C-2H-5A, 128.0cm		3
346	U1426	C	2	H	5	A	130	13.8	14.052		14.032	35.9	-0.3	3.6	8.5	9	8.5	41523	USB4000-VIS-RF52054	SHMSL	U1426C-2H-5A, 130.0cm		3
346	U1426	C	2	H	5	A	132	13.82	14.072		14.052	34.6	-0.1	3.6	7.9	8.3	7.9	41523	USB4000-VIS-RF52054	SHMSL	U1426C-2H-5A, 132.0cm		3
346	U1426	C	2	H	5	A	134	13.84	14.092		14.072	35.5	-0.1	3.5	8.3	8.7	8.3	41523	USB4000-VIS-RF52054	SHMSL	U1426C-2H-5A, 134.0cm		3
346	U1426	C	2	H	5	A	136	13.86	14.112		14.092	35.3	-0.1	3.4	8.2	8.7	8.3	41523	USB4000-VIS-RF52054	SHMSL	U1426C-2H-5A, 136.0cm		3
346	U1426	C	2	H	5	A	138	13.88	14.132		14.112	35.7	0.2	2.8	8.4	8.9	8.6	41523	USB4000-VIS-RF52054	SHMSL	U1426C-2H-5A, 138.0cm		3
346	U1426	C	2	H	5	A	140	13.9	14.152		14.132	35	-0.1	3.4	8.1	8.5	8.1	41523	USB4000-VIS-RF52054	SHMSL	U1426C-2H-5A, 140.0cm		3
346	U1426	C	2	H	5	A	142	13.92	14.172		14.152	35.5	-0.2	3.8	8.3	8.8	8.3	41523	USB4000-VIS-RF52054	SHMSL	U1426C-2H-5A, 142.0cm		3
346	U1426	C	2	H	5	A	144	13.94	14.192		14.172	36.9	-0.1	2.4	9	9.5	9.4	41523	USB4000-VIS-RF52054	SHMSL	U1426C-2H-5A, 144.0cm		3
346	U1426	C	2	H	5	A	146	13.96	14.212		14.192	36.2	-0.2	3.1	8.6	9.1	8.8	41523	USB4000-VIS-RF52054	SHMSL	U1426C-2H-5A, 146.0cm		3
346	U1426	C	2	H	5	A	148	13.98	14.232		14.212	34.2	-0.2	3.3	7.7	8.1	7.7	41523	USB4000-VIS-RF52054	SHMSL	U1426C-2H-5A, 148.0cm		3
346	U1426	C	2	H	6	A	2	14.02	14.272		14.252	26.4	0.7	0	4.7	4.9	5.3	41523	USB4000-VIS-RF52054	SHMSL	U1426C-2H-6A, 2.0cm		3
346	U1426	C	2	H	6	A	4	14.04	14.292		14.272	42.9	1.2	-1.3	12.6	13.1	14.6	41523	USB4000-VIS-RF52054	SHMSL	U1426C-2H-6A, 4.0cm		3
346	U1426	C	2	H	6	A	6	14.06	14.312		14.292	44.8	1.3	-2	13.9	14.4	16.4	41523	USB4000-VIS-RF52054	SHMSL	U1426C-2H-6A, 6.0cm		3
346	U1426	C	2	H	6	A	8	14.08	14.332		14.312	34.7	-0.2	4.6	7.9	8.3	7.6	41523	USB4000-VIS-RF52054	SHMSL	U1426C-2H-6A, 8.0cm		3
346	U1426	C	2	H	6	A	10	14.1	14.352		14.332	34.5	0	4.4	7.8	8.2	7.6	41523	USB4000-VIS-RF52054	SHMSL	U1426C-2H-6A, 10.0cm		3
346	U1426	C	2	H	6	A	12	14.12	14.372		14.352	33.7	-0.1	5.3	7.4	7.9	7	41523	USB4000-VIS-RF52054	SHMSL	U1426C-2H-6A, 12.0cm		3
346	U1426	C	2	H	6	A	14	14.14	14.392		14.372	35.6	-0.1	4.1	8.4	8.8	8.2	41523	USB4000-VIS-RF52054	SHMSL	U1426C-2H-6A, 14.0cm		3
346	U1426	C	2	H	6	A	16	14.16	14.412		14.392	34.9	-0.1	3.9	8	8.4	7.9	41523	USB4000-VIS-RF52054	SHMSL	U1426C-2H-6A, 16.0cm		3
346	U1426	C	2	H	6	A	18	14.18	14.432		14.412	33.2	-0.3	4.1	7.2	7.6	7.1	41523	USB4000-VIS-RF52054	SHMSL	U1426C-2H-6A, 18.0cm		3
346	U1426	C	2	H	6	A	20	14.2	14.452		14.432	33.1	-0.2	3.8	7.2	7.6	7.1	41523	USB4000-VIS-RF52054	SHMSL	U1426C-2H-6A, 20.0cm		3
346	U1426	C	2	H	6	A	22	14.22	14.472		14.452	32.6	-0.2	3.7	6.9	7.3	6.9	41523	USB4000-VIS-RF52054	SHMSL	U1426C-2H-6A, 22.0cm		3
346	U1426	C	2	H	6	A	24	14.24	14.492		14.472	33.7	-0.4	4.2	7.4	7.9	7.3	41523	USB4000-VIS-RF52054	SHMSL	U1426C-2H-6A, 24.0cm		3
346	U1426	C	2	H	6	A	26	14.26	14.512		14.492	34.6	-0.3	4	7.8	8.3	7.7	41523	USB4000-VIS-RF52054	SHMSL	U1426C-2H-6A, 26.0cm		3
346	U1426	C	2	H	6	A	28	14.28	14.532		14.512	34.6	-0.4	4.2	7.9	8.3	7.7	41523	USB4000-VIS-RF52054	SHMSL	U1426C-2H-6A, 28.0cm		3
346	U1426	C	2	H	6	A	30	14.3	14.552		14.532	34.9	-0.5	4.2	8	8.5	7.9	41523	USB4000-VIS-RF52054	SHMSL	U1426C-2H-6A, 30.0cm		3
346	U1426	C	2	H	6	A	32	14.32	14.572		14.552	34.5	-0.3	4.1	7.8	8.3	7.7	41523	USB4000-VIS-RF52054	SHMSL	U1426C-2H-6A, 32.0cm		3
346	U1426	C	2	H	6	A	34	14.34	14.592		14.572	34.9	-0.3	4.6	8	8.5	7.7	41523	USB4000-VIS-RF52054	SHMSL	U1426C-2H-6A, 34.0cm		3
346	U1426	C	2	H	6	A	36	14.36	14.612		14.592	35.1	0	4	8.1	8.6	8	41523	USB4000-VIS-RF52054	SHMSL	U1426C-2H-6A, 36.0cm		3
346	U1426	C	2	H	6	A	38	14.38	14.632		14.612	34.4	-0.3	4.7	7.7	8.2	7.4	41523	USB4000-VIS-RF52054	SHMSL	U1426C-2H-6A, 38.0cm		3
346	U1426	C	2	H	6	A	40	14.4	14.652		14.632	34.7	-0.2	4.7	7.9	8.4	7.6	41523	USB4000-VIS-RF52054	SHMSL	U1426C-2H-6A, 40.0cm		3
346	U1426	C	2	H	6	A	42	14.42	14.672		14.652	33.5	0.1	4.4	7.4	7.8	7.1	41523	USB4000-VIS-RF52054	SHMSL	U1426C-2H-6A, 42.0cm		3
346	U1426	C	2	H	6	A	44	14.44	14.692		14.672	32.7	0.2	5.4	7.1	7.4	6.5	41523	USB4000-VIS-RF52054	SHMSL	U1426C-2H-6A, 44.0cm		3
346	U1426	C	2	H	6	A	46	14.46	14.712		14.692	34.7	0.5	3.1	8	8.4	8.1	41523	USB4000-VIS-RF52054	SHMSL	U1426C-2H-6A, 46.0cm		3
346	U1426	C	2	H	6	A	48	14.48	14.732		14.712	36	0.6	2.3	8.6	9	8.9	41523	USB4000-VIS-RF52054	SHMSL	U1426C-2H-6A, 48.0cm		3
346	U1426	C	2	H	6	A	50	14.5	14.752		14.732	32.6	-0.2	5.7	6.9	7.3	6.4	41523	USB4000-VIS-RF52054	SHMSL	U1426C-2H-6A, 50.0cm		3
346	U1426	C	2	H	6	A	52	14.52	14.772		14.752	34.6	0	4.2	7.9	8.3	7.7	41523	USB4000-VIS-RF52054	SHMSL	U1426C-2H-6A, 52.0cm		3
346	U1426	C	2	H	6	A	54	14.54	14.792		14.772	35.9	0.5	1.7	8.5	9	9.1	41523	USB4000-VIS-RF52054	SHMSL	U1426C-2H-6A, 54.0cm		3
346	U1426	C	2	H	6	A	56	14.56	14.812		14.792	33.4	0	4.5	7.3	7.7	7	41523	USB4000-VIS-RF52054	SHMSL	U1426C-2H-6A, 56.0cm		3
346	U1426	C	2	H	6	A	58	14.58	14.832		14.812	35.8	0.5	1.4	8.5	8.9	9.1	41523	USB4000-VIS-RF52054	SHMSL	U1426C-2H-6A, 58.0cm		3
346	U1426	C	2	H	6	A	60	14.6	14.852		14.832	32.6	0.1	3.7	7	7.4	6.9	41523	USB4000-VIS-RF52054	SHMSL	U1426C-2H-6A, 60.0cm		3
346	U1426	C	2	H	6	A	62	14.62	14.872		14.852	34.4	0.4	3.8	7.8	8.2	7.7	41523	USB4000-VIS-RF52054	SHMSL	U1426C-2H-6A, 62.0cm		3
346	U1426	C	2	H	6	A	64	14.64	14.892		14.872	34.8	0.5	3.1	8	8.4	8.1	41523	USB4000-VIS-RF52054	SHMSL	U1426C-2H-6A, 64.0cm		3
346	U1426	C	2	H	6	A	66	14.66	14.912		14.892	34	0.2	4.2	7.6	8	7.4	41523	USB4000-VIS-RF52054	SHMSL	U1426C-2H-6A, 66.0cm		3
346	U1426	C	2	H	6	A	68	14.68	14.932		14.912	32.5	-0.1	5.2	6.9	7.3	6.5	41523	USB4000-VIS-RF52054	SHMSL	U1426C-2H-6A, 68.0cm		3
346	U1426	C	2	H	6	A	70	14.7	14.952		14.932	34	0.3	3.1	7.6	8	7.7	41523	USB4000-VIS-RF52054	SHMSL	U1426C-2H-6A, 70.0cm		3
346	U1426	C	2	H	6	A	72	14.72	14.972		14.952	33.9	0	4.2	7.6	8	7.4	41523	USB4000-VIS-RF52054	SHMSL	U1426C-2H-6A, 72.0cm		3
346	U1426	C	2	H	6	A	74	14.74	14.992		14.972	33.8	0.1	2.8	7.5	7.9	7.7	41523	USB4000-VIS-RF52054	SHMSL	U1426C-2H-6A, 74.0cm		3
346	U1426	C	2	H	6	A	76	14.76	15.012		14.992	31.6	-0.5	4.2	6.5	6.9	6.3	41523	USB4000-VIS-RF52054	SHMSL	U1426C-2H-6A, 76.0cm		3
346	U1426	C	2	H	6	A	78	14.78	15.032		15.012	33.5	-0.2	3.1	7.4	7.8	7.5	41523	USB4000-VIS-RF52054	SHMSL	U1426C-2H-6A, 78.0cm		3
346	U1426	C	2	H	6	A	80	14.8	15.052		15.032	33.3	-0.3	3.3	7.2	7.7	7.3	41523	USB4000-VIS-RF52054	SHMSL	U1426C-2H-6A, 80.0cm		3
346	U1426	C	2	H	6	A	82	14.82	15.072		15.052	35.6	0	1.4	8.4	8.8	9	41523	USB4000-VIS-RF52054	SHMSL	U1426C-2H-6A, 82.0cm		3
346	U1426	C	2	H	6	A	84	14.84	15.092		15.072	33	-0.7	3.1	7.1	7.5	7.2	41523	USB4000-VIS-RF52054	SHMSL	U1426C-2H-6A, 84.0cm		3
346	U1426	C	2	H	6	A	86	14.86	15.112		15.092	33	-0.5	2	7.1	7.5	7.5	41523	USB4000-VIS-RF52054	SHMSL	U1426C-2H-6A, 86.0cm		3
346	U1426	C	2	H	6	A	88	14.88	15.132		15.112	33.4	-0.6	0.7	7.3	7.7	8.1	41523	USB4000-VIS-RF52054	SHMSL	U1426C-2H-6A, 88.0cm		3
346	U1426	C	2	H	6	A	90	14.9	15.152		15.132	34.7	-0.4	0	7.9	8.3	9	41523	USB4000-VIS-RF52054	SHMSL	U1426C-2H-6A, 90.0cm		3
346	U1426	C	2	H	6	A	92	14.92	15.172		15.152	36	-0.1	-0.9	8.5	9	9.9	41523	USB4000-VIS-RF52054	SHMSL	U1426C-2H-6A, 92.0cm		3
346	U1426	C	2	H	6	A	94	14.94	15.192		15.172	34.2	-0.6	0.4	7.6	8.1	8.6	41523	USB4000-VIS-RF52054	SHMSL	U1426C-2H-6A, 94.0cm		3
346	U1426	C	2	H	6	A	96	14.96	15.212		15.192	34.6	-0.7	0.5	7.8	8.3	8.7	41523	USB4000-VIS-RF52054	SHMSL	U1426C-2H-6A, 96.0cm		3
346	U1426	C	2	H	6	A	98	14.98	15.232		15.212	34.3	-0.6	0.5	7.7	8.2	8.6	41523	USB4000-VIS-RF52054	SHMSL	U1426C-2H-6A, 98.0cm		3
346	U1426	C	2	H	6	A	100	15	15.252		15.232	34.7	-0.6	-0.1	7.8	8.3	9	41523	USB4000-VIS-RF52054	SHMSL	U1426C-2H-6A, 100.0cm		3
346	U1426	C	2	H	6	A	102	15.02	15.272		15.252	34.3	-0.7	-0.1	7.7	8.1	8.8	41523	USB4000-VIS-RF52054	SHMSL	U1426C-2H-6A, 102.0cm		3
346	U1426	C	2	H	6	A	104	15.04	15.292		15.272	34.4	-0.5	-0.5	7.7	8.2	9	41523	USB4000-VIS-RF52054	SHMSL	U1426C-2H-6A, 104.0cm		3
346	U1426	C	2	H	6	A	106	15.06	15.312		15.292	33.1	-0.5	-0.5	7.1	7.6	8.3	41523	USB4000-VIS-RF52054	SHMSL	U1426C-2H-6A, 106.0cm		3
346	U1426	C	2	H	6	A	108	15.08	15.332		15.312	32.1	-0.2	-1	6.7	7.1	7.9	41523	USB4000-VIS-RF52054	SHMSL	U1426C-2H-6A, 108.0cm		3
346	U1426	C	2	H	6	A	110	15.1	15.352		15.332	34.2	-0.6	-0.2	7.6	8.1	8.8	41523	USB4000-VIS-RF52054	SHMSL	U1426C-2H-6A, 110.0cm		3
346	U1426	C	2	H	6	A	112	15.12	15.372		15.352	37	-0.3	-1.1	9	9.5	10.6	41523	USB4000-VIS-RF52054	SHMSL	U1426C-2H-6A, 112.0cm		3
346	U1426	C	2	H	6	A	114	15.14	15.392		15.372	34.1	-0.7	-0.4	7.6	8	8.8	41523	USB4000-VIS-RF52054	SHMSL	U1426C-2H-6A, 114.0cm		3
346	U1426	C	2	H	6	A	116	15.16	15.412		15.392	35.7	-0.6	-0.3	8.3	8.8	9.6	41523	USB4000-VIS-RF52054	SHMSL	U1426C-2H-6A, 116.0cm		3
346	U1426	C	2	H	6	A	118	15.18	15.432		15.412	34.1	-0.7	-0.1	7.5	8	8.7	41523	USB4000-VIS-RF52054	SHMSL	U1426C-2H-6A, 118.0cm		3
346	U1426	A	3	H	2	A	83	14.33	15.45		15.4303	32.8	-0.6	0.5	7	7.4	7.8	41520.6	USB4000-VIS-RF52054	SHMSL	U1426A-3H-2A, 83.0cm		4
346	U1426	A	3	H	2	A	84	14.34	15.46		15.4403	33.3	-0.5	0.5	7.2	7.7	8.1	41520.6	USB4000-VIS-RF52054	SHMSL	U1426A-3H-2A, 84.0cm		4
346	U1426	A	3	H	2	A	85	14.35	15.47		15.4503	32.9	-0.6	0.4	7	7.5	7.9	41520.6	USB4000-VIS-RF52054	SHMSL	U1426A-3H-2A, 85.0cm		4
346	U1426	A	3	H	2	A	86	14.36	15.48		15.4603	33.8	-0.4	0.2	7.4	7.9	8.4	41520.6	USB4000-VIS-RF52054	SHMSL	U1426A-3H-2A, 86.0cm		4
346	U1426	A	3	H	2	A	87	14.37	15.49		15.4703	32.7	-0.7	0.6	6.9	7.4	7.7	41520.6	USB4000-VIS-RF52054	SHMSL	U1426A-3H-2A, 87.0cm		4
346	U1426	A	3	H	2	A	88	14.38	15.5		15.4803	33.9	-0.5	0.1	7.5	8	8.5	41520.6	USB4000-VIS-RF52054	SHMSL	U1426A-3H-2A, 88.0cm		4
346	U1426	A	3	H	2	A	89	14.39	15.51		15.4903	33	-0.7	0.7	7.1	7.5	7.9	41520.6	USB4000-VIS-RF52054	SHMSL	U1426A-3H-2A, 89.0cm		4
346	U1426	A	3	H	2	A	90	14.4	15.52		15.5003	34.1	-0.4	0.3	7.6	8	8.5	41520.6	USB4000-VIS-RF52054	SHMSL	U1426A-3H-2A, 90.0cm		4
346	U1426	A	3	H	2	A	91	14.41	15.53		15.5103	33	-0.7	0.9	7.1	7.5	7.8	41520.6	USB4000-VIS-RF52054	SHMSL	U1426A-3H-2A, 91.0cm		4
346	U1426	A	3	H	2	A	92	14.42	15.54		15.5203	32.2	-0.6	0.4	6.8	7.2	7.6	41520.6	USB4000-VIS-RF52054	SHMSL	U1426A-3H-2A, 92.0cm		4
346	U1426	A	3	H	2	A	93	14.43	15.55		15.5303	33.7	-0.6	0.7	7.4	7.9	8.2	41520.6	USB4000-VIS-RF52054	SHMSL	U1426A-3H-2A, 93.0cm		4
346	U1426	A	3	H	2	A	94	14.44	15.56		15.5403	33.8	-0.5	0.4	7.5	7.9	8.4	41520.6	USB4000-VIS-RF52054	SHMSL	U1426A-3H-2A, 94.0cm		4
346	U1426	A	3	H	2	A	95	14.45	15.57		15.5503	32.8	-0.6	0.6	7	7.5	7.8	41520.6	USB4000-VIS-RF52054	SHMSL	U1426A-3H-2A, 95.0cm		4
346	U1426	A	3	H	2	A	96	14.46	15.58		15.5603	32.7	-0.6	0.7	7	7.4	7.8	41520.6	USB4000-VIS-RF52054	SHMSL	U1426A-3H-2A, 96.0cm		4
346	U1426	A	3	H	2	A	97	14.47	15.59		15.5703	32.6	-0.8	1.2	6.9	7.3	7.5	41520.6	USB4000-VIS-RF52054	SHMSL	U1426A-3H-2A, 97.0cm		4
346	U1426	A	3	H	2	A	98	14.48	15.6		15.5803	33.7	-0.4	0.8	7.4	7.9	8.2	41520.6	USB4000-VIS-RF52054	SHMSL	U1426A-3H-2A, 98.0cm		4
346	U1426	A	3	H	2	A	99	14.49	15.61		15.5903	33.1	-0.5	0.6	7.1	7.6	7.9	41520.6	USB4000-VIS-RF52054	SHMSL	U1426A-3H-2A, 99.0cm		4
346	U1426	A	3	H	2	A	100	14.5	15.62		15.6003	33.1	-0.7	1	7.1	7.6	7.9	41520.6	USB4000-VIS-RF52054	SHMSL	U1426A-3H-2A, 100.0cm		4
346	U1426	A	3	H	2	A	101	14.51	15.63		15.6103	32.5	-0.6	1.5	6.9	7.3	7.4	41520.6	USB4000-VIS-RF52054	SHMSL	U1426A-3H-2A, 101.0cm		4
346	U1426	A	3	H	2	A	102	14.52	15.64		15.6203	33.1	-0.4	0.3	7.1	7.6	8	41520.6	USB4000-VIS-RF52054	SHMSL	U1426A-3H-2A, 102.0cm		4
346	U1426	A	3	H	2	A	103	14.53	15.65		15.6303	32.5	-0.4	0.6	6.9	7.3	7.7	41520.6	USB4000-VIS-RF52054	SHMSL	U1426A-3H-2A, 103.0cm		4
346	U1426	A	3	H	2	A	104	14.54	15.66		15.6403	32.2	-0.5	1.2	6.8	7.2	7.4	41520.6	USB4000-VIS-RF52054	SHMSL	U1426A-3H-2A, 104.0cm		4
346	U1426	A	3	H	2	A	105	14.55	15.67		15.6503	32.7	-0.5	1.1	7	7.4	7.7	41520.6	USB4000-VIS-RF52054	SHMSL	U1426A-3H-2A, 105.0cm		4
346	U1426	A	3	H	2	A	106	14.56	15.68		15.6603	32.5	-0.5	0.7	6.9	7.3	7.7	41520.6	USB4000-VIS-RF52054	SHMSL	U1426A-3H-2A, 106.0cm		4
346	U1426	A	3	H	2	A	107	14.57	15.69		15.6703	31.9	-0.6	1.4	6.6	7	7.2	41520.6	USB4000-VIS-RF52054	SHMSL	U1426A-3H-2A, 107.0cm		4
346	U1426	A	3	H	2	A	108	14.58	15.7		15.6803	31.9	-0.6	1.2	6.6	7	7.2	41520.6	USB4000-VIS-RF52054	SHMSL	U1426A-3H-2A, 108.0cm		4
346	U1426	A	3	H	2	A	109	14.59	15.71		15.6903	32.4	-0.5	1.1	6.8	7.2	7.5	41520.6	USB4000-VIS-RF52054	SHMSL	U1426A-3H-2A, 109.0cm		4
346	U1426	A	3	H	2	A	110	14.6	15.72		15.7003	31.6	-0.5	1.4	6.5	6.9	7.1	41520.6	USB4000-VIS-RF52054	SHMSL	U1426A-3H-2A, 110.0cm		4
346	U1426	A	3	H	2	A	111	14.61	15.73		15.7103	31.4	-0.5	1.5	6.4	6.8	6.9	41520.6	USB4000-VIS-RF52054	SHMSL	U1426A-3H-2A, 111.0cm		4
346	U1426	A	3	H	2	A	112	14.62	15.74		15.7203	31.8	-0.5	2.1	6.6	7	7	41520.6	USB4000-VIS-RF52054	SHMSL	U1426A-3H-2A, 112.0cm		4
346	U1426	A	3	H	2	A	113	14.63	15.75		15.7303	31.1	-0.5	2.1	6.3	6.7	6.7	41520.6	USB4000-VIS-RF52054	SHMSL	U1426A-3H-2A, 113.0cm		4
346	U1426	A	3	H	2	A	114	14.64	15.76		15.7403	31	-0.5	1.7	6.3	6.6	6.7	41520.6	USB4000-VIS-RF52054	SHMSL	U1426A-3H-2A, 114.0cm		4
346	U1426	A	3	H	2	A	115	14.65	15.77		15.7503	30.7	-0.7	2.1	6.1	6.5	6.5	41520.6	USB4000-VIS-RF52054	SHMSL	U1426A-3H-2A, 115.0cm		4
346	U1426	A	3	H	2	A	116	14.66	15.78		15.7603	30.5	-0.6	2.1	6.1	6.4	6.4	41520.6	USB4000-VIS-RF52054	SHMSL	U1426A-3H-2A, 116.0cm		4
346	U1426	A	3	H	2	A	117	14.67	15.79		15.7703	30.4	-0.5	1.9	6	6.4	6.4	41520.6	USB4000-VIS-RF52054	SHMSL	U1426A-3H-2A, 117.0cm		4
346	U1426	A	3	H	2	A	118	14.68	15.8		15.7803	31.2	-0.5	1.8	6.3	6.7	6.8	41520.6	USB4000-VIS-RF52054	SHMSL	U1426A-3H-2A, 118.0cm		4
346	U1426	A	3	H	2	A	119	14.69	15.81		15.7903	30.9	-0.6	2.2	6.2	6.6	6.5	41520.6	USB4000-VIS-RF52054	SHMSL	U1426A-3H-2A, 119.0cm		4
346	U1426	A	3	H	2	A	120	14.7	15.82		15.8003	30.2	-0.6	2.5	5.9	6.3	6.2	41520.6	USB4000-VIS-RF52054	SHMSL	U1426A-3H-2A, 120.0cm		4
346	U1426	A	3	H	2	A	121	14.71	15.83		15.8103	29.1	-0.5	2.8	5.5	5.9	5.6	41520.6	USB4000-VIS-RF52054	SHMSL	U1426A-3H-2A, 121.0cm		4
346	U1426	A	3	H	2	A	122	14.72	15.84		15.8203	28.9	-0.4	3.7	5.5	5.8	5.4	41520.6	USB4000-VIS-RF52054	SHMSL	U1426A-3H-2A, 122.0cm		4
346	U1426	A	3	H	2	A	123	14.73	15.85		15.8303	29.5	-0.3	3.4	5.7	6	5.7	41520.6	USB4000-VIS-RF52054	SHMSL	U1426A-3H-2A, 123.0cm		4
346	U1426	A	3	H	2	A	124	14.74	15.86		15.8403	28.7	-0.4	3.8	5.4	5.7	5.3	41520.6	USB4000-VIS-RF52054	SHMSL	U1426A-3H-2A, 124.0cm		4
346	U1426	A	3	H	2	A	125	14.75	15.87		15.8503	28.6	-0.5	4	5.3	5.7	5.2	41520.6	USB4000-VIS-RF52054	SHMSL	U1426A-3H-2A, 125.0cm		4
346	U1426	A	3	H	2	A	126	14.76	15.88		15.8603	26.5	-0.3	2.7	4.6	4.9	4.7	41520.6	USB4000-VIS-RF52054	SHMSL	U1426A-3H-2A, 126.0cm		4
346	U1426	A	3	H	2	A	127	14.77	15.89		15.8703	30.2	-0.4	2.8	6	6.3	6.1	41520.6	USB4000-VIS-RF52054	SHMSL	U1426A-3H-2A, 127.0cm		4
346	U1426	A	3	H	2	A	128	14.78	15.9		15.8803	30.8	-0.5	2.2	6.2	6.6	6.5	41520.6	USB4000-VIS-RF52054	SHMSL	U1426A-3H-2A, 128.0cm		4
346	U1426	A	3	H	2	A	129	14.79	15.91		15.8903	29.8	-0.5	3.3	5.8	6.2	5.8	41520.6	USB4000-VIS-RF52054	SHMSL	U1426A-3H-2A, 129.0cm		4
346	U1426	A	3	H	2	A	130	14.8	15.92		15.9003	31.9	-0.3	1.2	6.7	7.1	7.3	41520.6	USB4000-VIS-RF52054	SHMSL	U1426A-3H-2A, 130.0cm		4
346	U1426	A	3	H	2	A	131	14.81	15.93		15.9103	31.6	-0.5	1.3	6.5	6.9	7.1	41520.6	USB4000-VIS-RF52054	SHMSL	U1426A-3H-2A, 131.0cm		4
346	U1426	A	3	H	2	A	132	14.82	15.94		15.9203	32.4	-0.4	0.9	6.8	7.2	7.5	41520.6	USB4000-VIS-RF52054	SHMSL	U1426A-3H-2A, 132.0cm		4
346	U1426	A	3	H	2	A	133	14.83	15.95		15.9303	31.4	-0.5	1.1	6.4	6.8	7.1	41520.6	USB4000-VIS-RF52054	SHMSL	U1426A-3H-2A, 133.0cm		4
346	U1426	A	3	H	2	A	134	14.84	15.96		15.9403	30.5	-0.3	0.3	6.1	6.4	6.8	41520.6	USB4000-VIS-RF52054	SHMSL	U1426A-3H-2A, 134.0cm		4
346	U1426	A	3	H	2	A	135	14.85	15.97		15.9503	32.5	-0.4	1.4	6.9	7.3	7.5	41520.6	USB4000-VIS-RF52054	SHMSL	U1426A-3H-2A, 135.0cm		4
346	U1426	A	3	H	2	A	136	14.86	15.98		15.9603	31.7	-0.4	1.4	6.6	7	7.1	41520.6	USB4000-VIS-RF52054	SHMSL	U1426A-3H-2A, 136.0cm		4
346	U1426	A	3	H	2	A	137	14.87	15.99		15.9703	33	-0.4	0.9	7.1	7.5	7.8	41520.6	USB4000-VIS-RF52054	SHMSL	U1426A-3H-2A, 137.0cm		4
346	U1426	A	3	H	2	A	138	14.88	16		15.9803	32.5	-0.5	0.7	6.9	7.3	7.7	41520.6	USB4000-VIS-RF52054	SHMSL	U1426A-3H-2A, 138.0cm		4
346	U1426	A	3	H	2	A	139	14.89	16.01		15.9903	32.7	-0.6	1.3	7	7.4	7.6	41520.6	USB4000-VIS-RF52054	SHMSL	U1426A-3H-2A, 139.0cm		4
346	U1426	A	3	H	2	A	140	14.9	16.02		16.0003	33.9	-0.4	-0.1	7.5	8	8.6	41520.6	USB4000-VIS-RF52054	SHMSL	U1426A-3H-2A, 140.0cm		4
346	U1426	A	3	H	2	A	141	14.91	16.03		16.0103	36.6	0.1	-1	8.9	9.3	10.4	41520.6	USB4000-VIS-RF52054	SHMSL	U1426A-3H-2A, 141.0cm		4
346	U1426	A	3	H	2	A	142	14.92	16.04		16.0203	35.3	-0.3	0	8.2	8.6	9.3	41520.6	USB4000-VIS-RF52054	SHMSL	U1426A-3H-2A, 142.0cm		4
346	U1426	A	3	H	2	A	143	14.93	16.05		16.0303	34.2	-0.4	0.3	7.7	8.1	8.6	41520.6	USB4000-VIS-RF52054	SHMSL	U1426A-3H-2A, 143.0cm		4
346	U1426	A	3	H	2	A	144	14.94	16.06		16.0403	35.2	-0.3	-0.6	8.1	8.6	9.4	41520.6	USB4000-VIS-RF52054	SHMSL	U1426A-3H-2A, 144.0cm		4
346	U1426	A	3	H	2	A	145	14.95	16.07		16.0503	35	-0.2	-0.8	8.1	8.5	9.4	41520.6	USB4000-VIS-RF52054	SHMSL	U1426A-3H-2A, 145.0cm		4
346	U1426	A	3	H	2	A	146	14.96	16.08		16.0603	33.7	-0.2	-0.2	7.4	7.9	8.5	41520.6	USB4000-VIS-RF52054	SHMSL	U1426A-3H-2A, 146.0cm		4
346	U1426	A	3	H	2	A	147	14.97	16.09		16.0703	33.6	-0.3	-0.4	7.4	7.8	8.5	41520.6	USB4000-VIS-RF52054	SHMSL	U1426A-3H-2A, 147.0cm		4
346	U1426	A	3	H	2	A	148	14.98	16.1		16.0803	28.3	0.4	-1.7	5.3	5.6	6.4	41520.6	USB4000-VIS-RF52054	SHMSL	U1426A-3H-2A, 148.0cm		4
346	U1426	A	3	H	2	A	149	14.99	16.11		16.0903	30.7	0.5	-2	6.2	6.5	7.5	41520.6	USB4000-VIS-RF52054	SHMSL	U1426A-3H-2A, 149.0cm		4
346	U1426	A	3	H	3	A	2	15.02	16.14		16.1203	34.3	0	-2.2	7.8	8.2	9.5	41520.6	USB4000-VIS-RF52054	SHMSL	U1426A-3H-3A, 2.0cm		4
346	U1426	A	3	H	3	A	3	15.03	16.15		16.1303	34.7	0.1	-2	7.9	8.4	9.6	41520.6	USB4000-VIS-RF52054	SHMSL	U1426A-3H-3A, 3.0cm		4
346	U1426	A	3	H	3	A	4	15.04	16.16		16.1403	33.8	0	-1.9	7.5	7.9	9.1	41520.6	USB4000-VIS-RF52054	SHMSL	U1426A-3H-3A, 4.0cm		4
346	U1426	A	3	H	3	A	5	15.05	16.17		16.1503	33.6	-0.1	-1.9	7.4	7.8	8.9	41520.6	USB4000-VIS-RF52054	SHMSL	U1426A-3H-3A, 5.0cm		4
346	U1426	A	3	H	3	A	6	15.06	16.18		16.1603	33.9	-0.1	-1.8	7.5	8	9.1	41520.6	USB4000-VIS-RF52054	SHMSL	U1426A-3H-3A, 6.0cm		4
346	U1426	A	3	H	3	A	7	15.07	16.19		16.1703	34.1	-0.1	-1.8	7.6	8	9.2	41520.6	USB4000-VIS-RF52054	SHMSL	U1426A-3H-3A, 7.0cm		4
346	U1426	A	3	H	3	A	8	15.08	16.2		16.1803	34.3	0	-2.1	7.8	8.2	9.4	41520.6	USB4000-VIS-RF52054	SHMSL	U1426A-3H-3A, 8.0cm		4
346	U1426	A	3	H	3	A	9	15.09	16.21		16.1903	34	-0.1	-2.1	7.6	8	9.3	41520.6	USB4000-VIS-RF52054	SHMSL	U1426A-3H-3A, 9.0cm		4
346	U1426	A	3	H	3	A	10	15.1	16.22		16.2003	34.1	-0.1	-2.3	7.6	8	9.3	41520.6	USB4000-VIS-RF52054	SHMSL	U1426A-3H-3A, 10.0cm		4
346	U1426	A	3	H	3	A	11	15.11	16.23		16.2103	34.9	-0.2	-2.3	8	8.4	9.8	41520.6	USB4000-VIS-RF52054	SHMSL	U1426A-3H-3A, 11.0cm		4
346	U1426	A	3	H	3	A	12	15.12	16.24		16.2203	34.9	-0.2	-2.1	8	8.5	9.8	41520.6	USB4000-VIS-RF52054	SHMSL	U1426A-3H-3A, 12.0cm		4
346	U1426	A	3	H	3	A	13	15.13	16.25		16.2303	35.5	-0.1	-2.6	8.3	8.8	10.3	41520.6	USB4000-VIS-RF52054	SHMSL	U1426A-3H-3A, 13.0cm		4
346	U1426	A	3	H	3	A	14	15.14	16.26		16.2403	35.4	-0.2	-2.7	8.2	8.7	10.2	41520.6	USB4000-VIS-RF52054	SHMSL	U1426A-3H-3A, 14.0cm		4
346	U1426	A	3	H	3	A	15	15.15	16.27		16.2503	34.2	-0.2	-2.1	7.7	8.1	9.3	41520.6	USB4000-VIS-RF52054	SHMSL	U1426A-3H-3A, 15.0cm		4
346	U1426	A	3	H	3	A	16	15.16	16.28		16.2603	34.2	0.1	-2.6	7.7	8.1	9.5	41520.6	USB4000-VIS-RF52054	SHMSL	U1426A-3H-3A, 16.0cm		4
346	U1426	A	3	H	3	A	17	15.17	16.29		16.2703	35.1	-0.3	-2.4	8.1	8.5	9.9	41520.6	USB4000-VIS-RF52054	SHMSL	U1426A-3H-3A, 17.0cm		4
346	U1426	A	3	H	3	A	18	15.18	16.3		16.2803	35.5	-0.5	-3	8.2	8.7	10.4	41520.6	USB4000-VIS-RF52054	SHMSL	U1426A-3H-3A, 18.0cm		4
346	U1426	A	3	H	3	A	19	15.19	16.31		16.2903	36.2	-0.4	-3.1	8.6	9.1	10.9	41520.6	USB4000-VIS-RF52054	SHMSL	U1426A-3H-3A, 19.0cm		4
346	U1426	A	3	H	3	A	20	15.2	16.32		16.3003	35.7	-0.4	-2.7	8.3	8.8	10.4	41520.6	USB4000-VIS-RF52054	SHMSL	U1426A-3H-3A, 20.0cm		4
346	U1426	A	3	H	3	A	21	15.21	16.33		16.3103	38.3	0.3	-3.5	9.8	10.2	12.3	41520.6	USB4000-VIS-RF52054	SHMSL	U1426A-3H-3A, 21.0cm		4
346	U1426	A	3	H	3	A	22	15.22	16.34		16.3203	36.1	-0.1	-2.6	8.6	9	10.6	41520.6	USB4000-VIS-RF52054	SHMSL	U1426A-3H-3A, 22.0cm		4
346	U1426	A	3	H	3	A	23	15.23	16.35		16.3303	37.4	0.1	-3.2	9.3	9.8	11.6	41520.6	USB4000-VIS-RF52054	SHMSL	U1426A-3H-3A, 23.0cm		4
346	U1426	A	3	H	3	A	24	15.24	16.36		16.3403	36.4	0	-2.8	8.8	9.2	10.9	41520.6	USB4000-VIS-RF52054	SHMSL	U1426A-3H-3A, 24.0cm		4
346	U1426	A	3	H	3	A	25	15.25	16.37		16.3503	36.2	0.1	-2.1	8.7	9.1	10.5	41520.6	USB4000-VIS-RF52054	SHMSL	U1426A-3H-3A, 25.0cm		4
346	U1426	A	3	H	3	A	26	15.26	16.38		16.3603	36.2	0	-2.3	8.6	9.1	10.6	41520.6	USB4000-VIS-RF52054	SHMSL	U1426A-3H-3A, 26.0cm		4
346	U1426	A	3	H	3	A	27	15.27	16.39		16.3703	35.5	-0.1	-1.9	8.3	8.8	10	41520.6	USB4000-VIS-RF52054	SHMSL	U1426A-3H-3A, 27.0cm		4
346	U1426	A	3	H	3	A	28	15.28	16.4		16.3803	35.8	-0.3	-2.2	8.4	8.9	10.3	41520.6	USB4000-VIS-RF52054	SHMSL	U1426A-3H-3A, 28.0cm		4
346	U1426	A	3	H	3	A	29	15.29	16.41		16.3903	35.5	-0.2	-2.8	8.3	8.8	10.3	41520.6	USB4000-VIS-RF52054	SHMSL	U1426A-3H-3A, 29.0cm		4
346	U1426	A	3	H	3	A	30	15.3	16.42		16.4003	35.6	-0.3	-2.3	8.3	8.8	10.2	41520.6	USB4000-VIS-RF52054	SHMSL	U1426A-3H-3A, 30.0cm		4
346	U1426	A	3	H	3	A	31	15.31	16.43		16.4103	34.6	-0.3	-2.3	7.9	8.3	9.7	41520.6	USB4000-VIS-RF52054	SHMSL	U1426A-3H-3A, 31.0cm		4
346	U1426	A	3	H	3	A	32	15.32	16.44		16.4203	34.7	-0.3	-2.4	7.9	8.3	9.7	41520.6	USB4000-VIS-RF52054	SHMSL	U1426A-3H-3A, 32.0cm		4
346	U1426	A	3	H	3	A	33	15.33	16.45		16.4303	34.4	-0.2	-1.9	7.8	8.2	9.4	41520.6	USB4000-VIS-RF52054	SHMSL	U1426A-3H-3A, 33.0cm		4
346	U1426	A	3	H	3	A	34	15.34	16.46		16.4403	34.8	-0.2	-2.2	7.9	8.4	9.7	41520.6	USB4000-VIS-RF52054	SHMSL	U1426A-3H-3A, 34.0cm		4
346	U1426	A	3	H	3	A	35	15.35	16.47		16.4503	34.7	-0.2	-2.3	7.9	8.3	9.7	41520.6	USB4000-VIS-RF52054	SHMSL	U1426A-3H-3A, 35.0cm		4
346	U1426	A	3	H	3	A	36	15.36	16.48		16.4603	34.8	-0.2	-2.2	8	8.4	9.8	41520.6	USB4000-VIS-RF52054	SHMSL	U1426A-3H-3A, 36.0cm		4
346	U1426	A	3	H	3	A	37	15.37	16.49		16.4703	34.6	-0.3	-2.1	7.8	8.3	9.6	41520.6	USB4000-VIS-RF52054	SHMSL	U1426A-3H-3A, 37.0cm		4
346	U1426	A	3	H	3	A	38	15.38	16.5		16.4803	34.4	-0.3	-2.1	7.8	8.2	9.5	41520.6	USB4000-VIS-RF52054	SHMSL	U1426A-3H-3A, 38.0cm		4
346	U1426	A	3	H	3	A	39	15.39	16.51		16.4903	34.8	-0.3	-2.2	7.9	8.4	9.7	41520.6	USB4000-VIS-RF52054	SHMSL	U1426A-3H-3A, 39.0cm		4
346	U1426	A	3	H	3	A	40	15.4	16.52		16.5003	35.4	-0.3	-2.3	8.2	8.7	10.1	41520.6	USB4000-VIS-RF52054	SHMSL	U1426A-3H-3A, 40.0cm		4
346	U1426	A	3	H	3	A	41	15.41	16.53		16.5103	36.2	-0.5	-2.1	8.6	9.1	10.5	41520.6	USB4000-VIS-RF52054	SHMSL	U1426A-3H-3A, 41.0cm		4
346	U1426	A	3	H	3	A	42	15.42	16.54		16.5203	36.4	-0.3	-2.5	8.7	9.2	10.7	41520.6	USB4000-VIS-RF52054	SHMSL	U1426A-3H-3A, 42.0cm		4
346	U1426	A	3	H	3	A	43	15.43	16.55		16.5303	35.9	-0.2	-2.8	8.5	9	10.6	41520.6	USB4000-VIS-RF52054	SHMSL	U1426A-3H-3A, 43.0cm		4
346	U1426	A	3	H	3	A	44	15.44	16.56		16.5403	36	-0.4	-2.9	8.5	9	10.6	41520.6	USB4000-VIS-RF52054	SHMSL	U1426A-3H-3A, 44.0cm		4
346	U1426	A	3	H	3	A	45	15.45	16.57		16.5503	36.6	-0.4	-2.4	8.8	9.3	10.8	41520.6	USB4000-VIS-RF52054	SHMSL	U1426A-3H-3A, 45.0cm		4
346	U1426	A	3	H	3	A	46	15.46	16.58		16.5603	36	-0.3	-1.9	8.5	9	10.3	41520.6	USB4000-VIS-RF52054	SHMSL	U1426A-3H-3A, 46.0cm		4
346	U1426	A	3	H	3	A	47	15.47	16.59		16.5703	33.7	-0.1	-1.4	7.4	7.8	8.8	41520.6	USB4000-VIS-RF52054	SHMSL	U1426A-3H-3A, 47.0cm		4
346	U1426	A	3	H	3	A	48	15.48	16.6		16.5803	33.1	0.1	0.1	7.2	7.6	8.1	41520.6	USB4000-VIS-RF52054	SHMSL	U1426A-3H-3A, 48.0cm		4
346	U1426	A	3	H	3	A	49	15.49	16.61		16.5903	31.4	0.2	0.3	6.5	6.8	7.2	41520.6	USB4000-VIS-RF52054	SHMSL	U1426A-3H-3A, 49.0cm		4
346	U1426	A	3	H	3	A	50	15.5	16.62		16.6003	31.6	0.6	-0.2	6.6	6.9	7.5	41520.6	USB4000-VIS-RF52054	SHMSL	U1426A-3H-3A, 50.0cm		4
346	U1426	A	3	H	3	A	51	15.51	16.63		16.6103	32.4	0.5	-0.4	6.9	7.2	7.9	41520.6	USB4000-VIS-RF52054	SHMSL	U1426A-3H-3A, 51.0cm		4
346	U1426	A	3	H	3	A	52	15.52	16.64		16.6203	32.1	0.8	-1.1	6.8	7.1	7.9	41520.6	USB4000-VIS-RF52054	SHMSL	U1426A-3H-3A, 52.0cm		4
346	U1426	A	3	H	3	A	53	15.53	16.65		16.6303	32	0.4	-0.4	6.7	7.1	7.7	41520.6	USB4000-VIS-RF52054	SHMSL	U1426A-3H-3A, 53.0cm		4
346	U1426	A	3	H	3	A	54	15.54	16.66		16.6403	33.3	0.4	-0.3	7.3	7.7	8.4	41520.6	USB4000-VIS-RF52054	SHMSL	U1426A-3H-3A, 54.0cm		4
346	U1426	A	3	H	3	A	55	15.55	16.67		16.6503	32.4	0.4	-0.2	6.9	7.3	7.9	41520.6	USB4000-VIS-RF52054	SHMSL	U1426A-3H-3A, 55.0cm		4
346	U1426	A	3	H	3	A	56	15.56	16.68		16.6603	32.5	0.5	-0.1	7	7.3	7.8	41520.6	USB4000-VIS-RF52054	SHMSL	U1426A-3H-3A, 56.0cm		4
346	U1426	A	3	H	3	A	57	15.57	16.69		16.6703	32.7	0.5	-0.4	7.1	7.4	8	41520.6	USB4000-VIS-RF52054	SHMSL	U1426A-3H-3A, 57.0cm		4
346	U1426	A	3	H	3	A	58	15.58	16.7		16.6803	34	0.8	-1.1	7.7	8	8.9	41520.6	USB4000-VIS-RF52054	SHMSL	U1426A-3H-3A, 58.0cm		4
346	U1426	A	3	H	3	A	59	15.59	16.71		16.6903	32	0.4	0	6.7	7.1	7.6	41520.6	USB4000-VIS-RF52054	SHMSL	U1426A-3H-3A, 59.0cm		4
346	U1426	A	3	H	3	A	60	15.6	16.72		16.7003	32.6	0.3	-0.1	7	7.3	7.9	41520.6	USB4000-VIS-RF52054	SHMSL	U1426A-3H-3A, 60.0cm		4
346	U1426	A	3	H	3	A	61	15.61	16.73		16.7103	32	0.4	-0.2	6.7	7.1	7.6	41520.6	USB4000-VIS-RF52054	SHMSL	U1426A-3H-3A, 61.0cm		4
346	U1426	A	3	H	3	A	62	15.62	16.74		16.7203	33.4	0.2	-0.5	7.4	7.7	8.5	41520.6	USB4000-VIS-RF52054	SHMSL	U1426A-3H-3A, 62.0cm		4
346	U1426	A	3	H	3	A	63	15.63	16.75		16.7303	35.7	0.1	-0.8	8.4	8.9	9.8	41520.6	USB4000-VIS-RF52054	SHMSL	U1426A-3H-3A, 63.0cm		4
346	U1426	A	3	H	3	A	64	15.64	16.76		16.7403	35.1	0.2	-1.2	8.1	8.6	9.6	41520.6	USB4000-VIS-RF52054	SHMSL	U1426A-3H-3A, 64.0cm		4
346	U1426	A	3	H	3	A	65	15.65	16.77		16.7503	34.3	0.1	-1	7.8	8.2	9.1	41520.6	USB4000-VIS-RF52054	SHMSL	U1426A-3H-3A, 65.0cm		4
346	U1426	A	3	H	3	A	66	15.66	16.78		16.7603	33.7	0.1	-0.9	7.5	7.9	8.7	41520.6	USB4000-VIS-RF52054	SHMSL	U1426A-3H-3A, 66.0cm		4
346	U1426	A	3	H	3	A	67	15.67	16.79		16.7703	33.6	0	-0.2	7.4	7.8	8.4	41520.6	USB4000-VIS-RF52054	SHMSL	U1426A-3H-3A, 67.0cm		4
346	U1426	A	3	H	3	A	68	15.68	16.8		16.7803	34.7	0.3	-0.6	7.9	8.3	9.1	41520.6	USB4000-VIS-RF52054	SHMSL	U1426A-3H-3A, 68.0cm		4
346	U1426	A	3	H	3	A	69	15.69	16.81		16.7903	33.7	0.1	0.1	7.5	7.9	8.4	41520.6	USB4000-VIS-RF52054	SHMSL	U1426A-3H-3A, 69.0cm		4
346	U1426	A	3	H	3	A	70	15.7	16.82		16.8003	33.3	0.1	0.8	7.3	7.7	8	41520.6	USB4000-VIS-RF52054	SHMSL	U1426A-3H-3A, 70.0cm		4
346	U1426	A	3	H	3	A	71	15.71	16.83		16.8103	33.3	0.1	0.7	7.3	7.7	8.1	41520.6	USB4000-VIS-RF52054	SHMSL	U1426A-3H-3A, 71.0cm		4
346	U1426	A	3	H	3	A	72	15.72	16.84		16.8203	33	0.2	0.7	7.2	7.5	7.9	41520.6	USB4000-VIS-RF52054	SHMSL	U1426A-3H-3A, 72.0cm		4
346	U1426	A	3	H	3	A	73	15.73	16.85		16.8303	34.2	0.1	0.7	7.7	8.1	8.5	41520.6	USB4000-VIS-RF52054	SHMSL	U1426A-3H-3A, 73.0cm		4
346	U1426	A	3	H	3	A	74	15.74	16.86		16.8403	35	-0.1	1.4	8	8.5	8.7	41520.6	USB4000-VIS-RF52054	SHMSL	U1426A-3H-3A, 74.0cm		4
346	U1426	A	3	H	3	A	75	15.75	16.87		16.8503	33.1	0	1	7.2	7.6	7.8	41520.6	USB4000-VIS-RF52054	SHMSL	U1426A-3H-3A, 75.0cm		4
346	U1426	A	3	H	3	A	76	15.76	16.88		16.8603	36.4	-0.6	-0.3	8.7	9.2	10	41520.6	USB4000-VIS-RF52054	SHMSL	U1426A-3H-3A, 76.0cm		4
346	U1426	A	3	H	3	A	77	15.77	16.89		16.8703	36.3	-0.7	-0.8	8.6	9.2	10.1	41520.6	USB4000-VIS-RF52054	SHMSL	U1426A-3H-3A, 77.0cm		4
346	U1426	A	3	H	3	A	78	15.78	16.9		16.8803	35.5	-0.6	-0.8	8.2	8.8	9.7	41520.6	USB4000-VIS-RF52054	SHMSL	U1426A-3H-3A, 78.0cm		4
346	U1426	A	3	H	3	A	79	15.79	16.91		16.8903	35.6	-0.5	-1.4	8.3	8.8	9.9	41520.6	USB4000-VIS-RF52054	SHMSL	U1426A-3H-3A, 79.0cm		4
346	U1426	A	3	H	3	A	80	15.8	16.92		16.9003	34.2	-0.3	-1.6	7.7	8.1	9.2	41520.6	USB4000-VIS-RF52054	SHMSL	U1426A-3H-3A, 80.0cm		4
346	U1426	A	3	H	3	A	81	15.81	16.93		16.9103	34.7	-0.3	-1.9	7.9	8.3	9.6	41520.6	USB4000-VIS-RF52054	SHMSL	U1426A-3H-3A, 81.0cm		4
346	U1426	A	3	H	3	A	82	15.82	16.94		16.9203	35.4	-0.4	-2.2	8.2	8.7	10.1	41520.6	USB4000-VIS-RF52054	SHMSL	U1426A-3H-3A, 82.0cm		4
346	U1426	A	3	H	3	A	83	15.83	16.95		16.9303	34.7	-0.5	-2	7.9	8.3	9.6	41520.6	USB4000-VIS-RF52054	SHMSL	U1426A-3H-3A, 83.0cm		4
346	U1426	A	3	H	3	A	84	15.84	16.96		16.9403	34.3	-0.5	-1.9	7.7	8.2	9.3	41520.6	USB4000-VIS-RF52054	SHMSL	U1426A-3H-3A, 84.0cm		4
346	U1426	A	3	H	3	A	85	15.85	16.97		16.9503	34	-0.5	-0.6	7.6	8	8.8	41520.6	USB4000-VIS-RF52054	SHMSL	U1426A-3H-3A, 85.0cm		4
346	U1426	A	3	H	3	A	86	15.86	16.98		16.9603	34.8	-0.4	-2	7.9	8.4	9.7	41520.6	USB4000-VIS-RF52054	SHMSL	U1426A-3H-3A, 86.0cm		4
346	U1426	A	3	H	3	A	87	15.87	16.99		16.9703	34.9	-0.5	-1.8	7.9	8.4	9.6	41520.6	USB4000-VIS-RF52054	SHMSL	U1426A-3H-3A, 87.0cm		4
346	U1426	A	3	H	3	A	88	15.88	17		16.9803	34.8	-0.5	-2.1	7.9	8.4	9.7	41520.6	USB4000-VIS-RF52054	SHMSL	U1426A-3H-3A, 88.0cm		4
346	U1426	A	3	H	3	A	89	15.89	17.01		16.9903	35	-0.4	-2.3	8	8.5	9.8	41520.6	USB4000-VIS-RF52054	SHMSL	U1426A-3H-3A, 89.0cm		4
346	U1426	A	3	H	3	A	90	15.9	17.02		17.0003	34.9	-0.6	-2.1	8	8.5	9.8	41520.6	USB4000-VIS-RF52054	SHMSL	U1426A-3H-3A, 90.0cm		4
346	U1426	A	3	H	3	A	91	15.91	17.03		17.0103	36.3	-0.5	-2.3	8.6	9.1	10.6	41520.6	USB4000-VIS-RF52054	SHMSL	U1426A-3H-3A, 91.0cm		4
346	U1426	A	3	H	3	A	92	15.92	17.04		17.0203	36	-0.6	-2.4	8.5	9	10.4	41520.6	USB4000-VIS-RF52054	SHMSL	U1426A-3H-3A, 92.0cm		4
346	U1426	A	3	H	3	A	93	15.93	17.05		17.0303	36.4	-0.5	-1.9	8.7	9.2	10.6	41520.6	USB4000-VIS-RF52054	SHMSL	U1426A-3H-3A, 93.0cm		4
346	U1426	A	3	H	3	A	94	15.94	17.06		17.0403	34.4	-0.8	-0.8	7.7	8.2	9.1	41520.6	USB4000-VIS-RF52054	SHMSL	U1426A-3H-3A, 94.0cm		4
346	U1426	A	3	H	3	A	95	15.95	17.07		17.0503	35.6	-0.7	-1.3	8.3	8.8	9.9	41520.6	USB4000-VIS-RF52054	SHMSL	U1426A-3H-3A, 95.0cm		4
346	U1426	A	3	H	3	A	96	15.96	17.08		17.0603	36.1	-0.8	-1.1	8.5	9	10	41520.6	USB4000-VIS-RF52054	SHMSL	U1426A-3H-3A, 96.0cm		4
346	U1426	A	3	H	3	A	97	15.97	17.09		17.0703	35.1	-0.8	-0.9	8	8.6	9.5	41520.6	USB4000-VIS-RF52054	SHMSL	U1426A-3H-3A, 97.0cm		4
346	U1426	A	3	H	3	A	98	15.98	17.1		17.0803	35.9	-0.7	-1.2	8.4	9	10	41520.6	USB4000-VIS-RF52054	SHMSL	U1426A-3H-3A, 98.0cm		4
346	U1426	A	3	H	3	A	99	15.99	17.11		17.0903	37.3	-0.5	-2.2	9.1	9.7	11.2	41520.6	USB4000-VIS-RF52054	SHMSL	U1426A-3H-3A, 99.0cm		4
346	U1426	A	3	H	3	A	100	16	17.12		17.1003	37.2	-0.6	-2.1	9.1	9.6	11.1	41520.6	USB4000-VIS-RF52054	SHMSL	U1426A-3H-3A, 100.0cm		4
346	U1426	A	3	H	3	A	101	16.01	17.13		17.1103	35.8	-0.6	-1.8	8.4	8.9	10.1	41520.6	USB4000-VIS-RF52054	SHMSL	U1426A-3H-3A, 101.0cm		4
346	U1426	A	3	H	3	A	102	16.02	17.14		17.1203	36.3	-0.7	-2.3	8.6	9.1	10.6	41520.6	USB4000-VIS-RF52054	SHMSL	U1426A-3H-3A, 102.0cm		4
346	U1426	A	3	H	3	A	103	16.03	17.15		17.1303	36.5	-0.7	-2.3	8.7	9.2	10.7	41520.6	USB4000-VIS-RF52054	SHMSL	U1426A-3H-3A, 103.0cm		4
346	U1426	A	3	H	3	A	104	16.04	17.16		17.1403	37	-0.9	-1.9	9	9.6	10.9	41520.6	USB4000-VIS-RF52054	SHMSL	U1426A-3H-3A, 104.0cm		4
346	U1426	A	3	H	3	A	105	16.05	17.17		17.1503	36.4	-0.8	-1.8	8.6	9.2	10.5	41520.6	USB4000-VIS-RF52054	SHMSL	U1426A-3H-3A, 105.0cm		4
346	U1426	A	3	H	3	A	106	16.06	17.18		17.1603	37.3	-0.8	-1.8	9.1	9.7	11	41520.6	USB4000-VIS-RF52054	SHMSL	U1426A-3H-3A, 106.0cm		4
346	U1426	A	3	H	3	A	107	16.07	17.19		17.1703	38.8	-0.5	-2.3	9.9	10.5	12.1	41520.6	USB4000-VIS-RF52054	SHMSL	U1426A-3H-3A, 107.0cm		4
346	U1426	A	3	H	3	A	108	16.08	17.2		17.1803	36.9	-0.7	-2.1	8.9	9.5	10.9	41520.6	USB4000-VIS-RF52054	SHMSL	U1426A-3H-3A, 108.0cm		4
346	U1426	A	3	H	3	A	109	16.09	17.21		17.1903	36.9	-0.7	-2.2	8.9	9.5	10.9	41520.6	USB4000-VIS-RF52054	SHMSL	U1426A-3H-3A, 109.0cm		4
346	U1426	A	3	H	3	A	110	16.1	17.22		17.2003	36.6	-0.5	-2.2	8.8	9.3	10.8	41520.6	USB4000-VIS-RF52054	SHMSL	U1426A-3H-3A, 110.0cm		4
346	U1426	A	3	H	3	A	111	16.11	17.23		17.2103	35.6	-0.7	-1.9	8.3	8.8	10.1	41520.6	USB4000-VIS-RF52054	SHMSL	U1426A-3H-3A, 111.0cm		4
346	U1426	A	3	H	3	A	112	16.12	17.24		17.2203	36.9	-0.7	-1.8	8.9	9.5	10.8	41520.6	USB4000-VIS-RF52054	SHMSL	U1426A-3H-3A, 112.0cm		4
346	U1426	A	3	H	3	A	113	16.13	17.25		17.2303	36.7	-0.7	-2.4	8.8	9.4	10.9	41520.6	USB4000-VIS-RF52054	SHMSL	U1426A-3H-3A, 113.0cm		4
346	U1426	A	3	H	3	A	114	16.14	17.26		17.2403	37.9	-0.8	-2.5	9.4	10	11.6	41520.6	USB4000-VIS-RF52054	SHMSL	U1426A-3H-3A, 114.0cm		4
346	U1426	A	3	H	3	A	115	16.15	17.27		17.2503	37.4	-0.2	-3.2	9.2	9.8	11.6	41520.6	USB4000-VIS-RF52054	SHMSL	U1426A-3H-3A, 115.0cm		4
346	U1426	A	3	H	3	A	116	16.16	17.28		17.2603	37.8	-0.9	-2.4	9.3	10	11.6	41520.6	USB4000-VIS-RF52054	SHMSL	U1426A-3H-3A, 116.0cm		4
346	U1426	A	3	H	3	A	117	16.17	17.29		17.2703	37.6	-0.8	-2.4	9.3	9.9	11.5	41520.6	USB4000-VIS-RF52054	SHMSL	U1426A-3H-3A, 117.0cm		4
346	U1426	A	3	H	3	A	118	16.18	17.3		17.2803	36.7	-0.8	-2.1	8.8	9.4	10.8	41520.6	USB4000-VIS-RF52054	SHMSL	U1426A-3H-3A, 118.0cm		4
346	U1426	A	3	H	3	A	119	16.19	17.31		17.2903	37.1	-0.9	-2.1	9	9.6	11	41520.6	USB4000-VIS-RF52054	SHMSL	U1426A-3H-3A, 119.0cm		4
346	U1426	A	3	H	3	A	120	16.2	17.32		17.3003	37.2	-0.9	-2	9.1	9.7	11.1	41520.6	USB4000-VIS-RF52054	SHMSL	U1426A-3H-3A, 120.0cm		4
346	U1426	A	3	H	3	A	121	16.21	17.33		17.3103	36.8	-0.8	-2.2	8.9	9.4	10.9	41520.6	USB4000-VIS-RF52054	SHMSL	U1426A-3H-3A, 121.0cm		4
346	U1426	A	3	H	3	A	122	16.22	17.34		17.3203	36.7	-0.9	-2	8.8	9.4	10.8	41520.6	USB4000-VIS-RF52054	SHMSL	U1426A-3H-3A, 122.0cm		4
346	U1426	A	3	H	3	A	123	16.23	17.35		17.3303	36.8	-0.8	-2.3	8.9	9.4	10.9	41520.6	USB4000-VIS-RF52054	SHMSL	U1426A-3H-3A, 123.0cm		4
346	U1426	A	3	H	3	A	124	16.24	17.36		17.3403	36.8	-0.8	-2.4	8.8	9.4	11	41520.6	USB4000-VIS-RF52054	SHMSL	U1426A-3H-3A, 124.0cm		4
346	U1426	A	3	H	3	A	125	16.25	17.37		17.3503	36.8	-0.9	-2.4	8.8	9.4	11	41520.6	USB4000-VIS-RF52054	SHMSL	U1426A-3H-3A, 125.0cm		4
346	U1426	A	3	H	3	A	126	16.26	17.38		17.3603	36.9	-0.9	-2.6	8.9	9.5	11.1	41520.6	USB4000-VIS-RF52054	SHMSL	U1426A-3H-3A, 126.0cm		4
346	U1426	A	3	H	3	A	127	16.27	17.39		17.3703	37.5	-0.8	-2.6	9.2	9.8	11.4	41520.6	USB4000-VIS-RF52054	SHMSL	U1426A-3H-3A, 127.0cm		4
346	U1426	A	3	H	3	A	128	16.28	17.4		17.3803	37	-0.8	-2.4	9	9.5	11.1	41520.6	USB4000-VIS-RF52054	SHMSL	U1426A-3H-3A, 128.0cm		4
346	U1426	A	3	H	3	A	129	16.29	17.41		17.3903	36.9	-0.9	-2.2	8.9	9.5	10.9	41520.6	USB4000-VIS-RF52054	SHMSL	U1426A-3H-3A, 129.0cm		4
346	U1426	A	3	H	3	A	130	16.3	17.42		17.4003	36.6	-1	-1.9	8.7	9.3	10.6	41520.6	USB4000-VIS-RF52054	SHMSL	U1426A-3H-3A, 130.0cm		4
346	U1426	A	3	H	3	A	131	16.31	17.43		17.4103	37.6	-0.9	-2.5	9.2	9.9	11.5	41520.6	USB4000-VIS-RF52054	SHMSL	U1426A-3H-3A, 131.0cm		4
346	U1426	A	3	H	3	A	132	16.32	17.44		17.4203	37.6	-0.7	-2.2	9.2	9.8	11.3	41520.6	USB4000-VIS-RF52054	SHMSL	U1426A-3H-3A, 132.0cm		4
346	U1426	A	3	H	3	A	133	16.33	17.45		17.4303	37	-0.8	-2.4	9	9.6	11.1	41520.6	USB4000-VIS-RF52054	SHMSL	U1426A-3H-3A, 133.0cm		4
346	U1426	A	3	H	3	A	134	16.34	17.46		17.4403	37.3	-0.8	-2.2	9.1	9.7	11.2	41520.6	USB4000-VIS-RF52054	SHMSL	U1426A-3H-3A, 134.0cm		4
346	U1426	A	3	H	3	A	135	16.35	17.47		17.4503	37.5	-0.7	-2.4	9.2	9.8	11.4	41520.6	USB4000-VIS-RF52054	SHMSL	U1426A-3H-3A, 135.0cm		4
346	U1426	A	3	H	3	A	136	16.36	17.48		17.4603	37.4	-0.8	-1.9	9.2	9.8	11.2	41520.6	USB4000-VIS-RF52054	SHMSL	U1426A-3H-3A, 136.0cm		4
346	U1426	A	3	H	3	A	137	16.37	17.49		17.4703	36.5	-0.6	-0.9	8.7	9.3	10.3	41520.6	USB4000-VIS-RF52054	SHMSL	U1426A-3H-3A, 137.0cm		4
346	U1426	A	3	H	3	A	138	16.38	17.5		17.4803	36.2	-0.6	-0.2	8.6	9.1	9.8	41520.6	USB4000-VIS-RF52054	SHMSL	U1426A-3H-3A, 138.0cm		4
346	U1426	A	3	H	3	A	139	16.39	17.51		17.4903	36.9	-0.5	-1.2	8.9	9.5	10.6	41520.6	USB4000-VIS-RF52054	SHMSL	U1426A-3H-3A, 139.0cm		4
346	U1426	A	3	H	3	A	140	16.4	17.52		17.5003	37.4	-0.6	-1.2	9.2	9.7	10.9	41520.6	USB4000-VIS-RF52054	SHMSL	U1426A-3H-3A, 140.0cm		4
346	U1426	A	3	H	3	A	141	16.41	17.53		17.5103	34.1	-0.4	0.8	7.6	8	8.4	41520.6	USB4000-VIS-RF52054	SHMSL	U1426A-3H-3A, 141.0cm		4
346	U1426	A	3	H	3	A	142	16.42	17.54		17.5203	37.4	-0.5	-1	9.2	9.8	10.8	41520.6	USB4000-VIS-RF52054	SHMSL	U1426A-3H-3A, 142.0cm		4
346	U1426	A	3	H	3	A	143	16.43	17.55		17.5303	34.9	-0.3	0.1	8	8.4	9	41520.6	USB4000-VIS-RF52054	SHMSL	U1426A-3H-3A, 143.0cm		4
346	U1426	A	3	H	3	A	144	16.44	17.56		17.5403	34.4	-0.2	0.3	7.8	8.2	8.7	41520.6	USB4000-VIS-RF52054	SHMSL	U1426A-3H-3A, 144.0cm		4
346	U1426	A	3	H	3	A	145	16.45	17.57		17.5503	34.8	-0.1	1	8	8.4	8.7	41520.6	USB4000-VIS-RF52054	SHMSL	U1426A-3H-3A, 145.0cm		4
346	U1426	A	3	H	3	A	146	16.46	17.58		17.5603	33.5	0.1	1.6	7.4	7.8	7.9	41520.6	USB4000-VIS-RF52054	SHMSL	U1426A-3H-3A, 146.0cm		4
346	U1426	A	3	H	3	A	147	16.47	17.59		17.5703	35.4	-0.1	2	8.2	8.7	8.7	41520.6	USB4000-VIS-RF52054	SHMSL	U1426A-3H-3A, 147.0cm		4
346	U1426	A	3	H	4	A	2	16.52	17.64		17.6203	29.7	0.1	1.3	5.8	6.1	6.2	41520.6	USB4000-VIS-RF52054	SHMSL	U1426A-3H-4A, 2.0cm		4
346	U1426	A	3	H	4	A	3	16.53	17.65		17.6303	31.1	-0.1	1.1	6.3	6.7	6.9	41520.6	USB4000-VIS-RF52054	SHMSL	U1426A-3H-4A, 3.0cm		4
346	U1426	A	3	H	4	A	4	16.54	17.66		17.6403	33.2	0.1	1.2	7.2	7.6	7.9	41520.6	USB4000-VIS-RF52054	SHMSL	U1426A-3H-4A, 4.0cm		4
346	U1426	A	3	H	4	A	5	16.55	17.67		17.6503	33.5	0.1	1.2	7.4	7.7	8	41520.6	USB4000-VIS-RF52054	SHMSL	U1426A-3H-4A, 5.0cm		4
346	U1426	A	3	H	4	A	6	16.56	17.68		17.6603	33.5	0.1	1	7.4	7.8	8.1	41520.6	USB4000-VIS-RF52054	SHMSL	U1426A-3H-4A, 6.0cm		4
346	U1426	A	3	H	4	A	7	16.57	17.69		17.6703	32.7	0	1.4	7	7.4	7.6	41520.6	USB4000-VIS-RF52054	SHMSL	U1426A-3H-4A, 7.0cm		4
346	U1426	A	3	H	4	A	8	16.58	17.7		17.6803	32.9	0	1.4	7.1	7.5	7.7	41520.6	USB4000-VIS-RF52054	SHMSL	U1426A-3H-4A, 8.0cm		4
346	U1426	A	3	H	4	A	9	16.59	17.71		17.6903	33.6	0	1.1	7.4	7.8	8.1	41520.6	USB4000-VIS-RF52054	SHMSL	U1426A-3H-4A, 9.0cm		4
346	U1426	A	3	H	4	A	10	16.6	17.72		17.7003	33.5	-0.1	1.4	7.4	7.8	7.9	41520.6	USB4000-VIS-RF52054	SHMSL	U1426A-3H-4A, 10.0cm		4
346	U1426	A	3	H	4	A	11	16.61	17.73		17.7103	33.7	0	1.4	7.5	7.9	8.1	41520.6	USB4000-VIS-RF52054	SHMSL	U1426A-3H-4A, 11.0cm		4
346	U1426	A	3	H	4	A	12	16.62	17.74		17.7203	33.8	-0.1	1.8	7.5	7.9	8	41520.6	USB4000-VIS-RF52054	SHMSL	U1426A-3H-4A, 12.0cm		4
346	U1426	A	3	H	4	A	13	16.63	17.75		17.7303	33.9	0	1.4	7.5	7.9	8.1	41520.6	USB4000-VIS-RF52054	SHMSL	U1426A-3H-4A, 13.0cm		4
346	U1426	A	3	H	4	A	14	16.64	17.76		17.7403	33.8	0.1	1	7.5	7.9	8.2	41520.6	USB4000-VIS-RF52054	SHMSL	U1426A-3H-4A, 14.0cm		4
346	U1426	A	3	H	4	A	15	16.65	17.77		17.7503	33.1	0	1.3	7.2	7.6	7.8	41520.6	USB4000-VIS-RF52054	SHMSL	U1426A-3H-4A, 15.0cm		4
346	U1426	A	3	H	4	A	16	16.66	17.78		17.7603	32.7	0.2	1	7	7.4	7.7	41520.6	USB4000-VIS-RF52054	SHMSL	U1426A-3H-4A, 16.0cm		4
346	U1426	A	3	H	4	A	17	16.67	17.79		17.7703	33.1	0	1.4	7.2	7.6	7.8	41520.6	USB4000-VIS-RF52054	SHMSL	U1426A-3H-4A, 17.0cm		4
346	U1426	A	3	H	4	A	18	16.68	17.8		17.7803	33.4	-0.1	1.6	7.3	7.7	7.8	41520.6	USB4000-VIS-RF52054	SHMSL	U1426A-3H-4A, 18.0cm		4
346	U1426	A	3	H	4	A	19	16.69	17.81		17.7903	34	0	1.3	7.6	8	8.2	41520.6	USB4000-VIS-RF52054	SHMSL	U1426A-3H-4A, 19.0cm		4
346	U1426	A	3	H	4	A	20	16.7	17.82		17.8003	34.2	-0.1	1.5	7.7	8.1	8.3	41520.6	USB4000-VIS-RF52054	SHMSL	U1426A-3H-4A, 20.0cm		4
346	U1426	A	3	H	4	A	21	16.71	17.83		17.8103	34.7	0.1	0.7	7.9	8.4	8.8	41520.6	USB4000-VIS-RF52054	SHMSL	U1426A-3H-4A, 21.0cm		4
346	U1426	A	3	H	4	A	22	16.72	17.84		17.8203	33.3	0	1.2	7.3	7.7	7.9	41520.6	USB4000-VIS-RF52054	SHMSL	U1426A-3H-4A, 22.0cm		4
346	U1426	A	3	H	4	A	23	16.73	17.85		17.8303	33.3	0.1	1.5	7.3	7.7	7.8	41520.6	USB4000-VIS-RF52054	SHMSL	U1426A-3H-4A, 23.0cm		4
346	U1426	A	3	H	4	A	24	16.74	17.86		17.8403	32.1	0	1.8	6.8	7.1	7.2	41520.6	USB4000-VIS-RF52054	SHMSL	U1426A-3H-4A, 24.0cm		4
346	U1426	A	3	H	4	A	25	16.75	17.87		17.8503	32.1	0.2	1.8	6.8	7.1	7.2	41520.6	USB4000-VIS-RF52054	SHMSL	U1426A-3H-4A, 25.0cm		4
346	U1426	A	3	H	4	A	26	16.76	17.88		17.8603	32.1	0	2.2	6.8	7.1	7.1	41520.6	USB4000-VIS-RF52054	SHMSL	U1426A-3H-4A, 26.0cm		4
346	U1426	A	3	H	4	A	27	16.77	17.89		17.8703	32.8	0.1	1.9	7.1	7.5	7.5	41520.6	USB4000-VIS-RF52054	SHMSL	U1426A-3H-4A, 27.0cm		4
346	U1426	A	3	H	4	A	28	16.78	17.9		17.8803	34.1	0.1	1.6	7.7	8.1	8.2	41520.6	USB4000-VIS-RF52054	SHMSL	U1426A-3H-4A, 28.0cm		4
346	U1426	A	3	H	4	A	29	16.79	17.91		17.8903	35.6	0.1	1.2	8.4	8.8	9.1	41520.6	USB4000-VIS-RF52054	SHMSL	U1426A-3H-4A, 29.0cm		4
346	U1426	A	3	H	4	A	30	16.8	17.92		17.9003	34.1	0.1	1.5	7.7	8.1	8.2	41520.6	USB4000-VIS-RF52054	SHMSL	U1426A-3H-4A, 30.0cm		4
346	U1426	A	3	H	4	A	31	16.81	17.93		17.9103	32.5	0.1	2	6.9	7.3	7.3	41520.6	USB4000-VIS-RF52054	SHMSL	U1426A-3H-4A, 31.0cm		4
346	U1426	A	3	H	4	A	32	16.82	17.94		17.9203	33	0.4	1.5	7.2	7.5	7.7	41520.6	USB4000-VIS-RF52054	SHMSL	U1426A-3H-4A, 32.0cm		4
346	U1426	A	3	H	4	A	33	16.83	17.95		17.9303	31.9	0.2	1.8	6.7	7.1	7.1	41520.6	USB4000-VIS-RF52054	SHMSL	U1426A-3H-4A, 33.0cm		4
346	U1426	A	3	H	4	A	34	16.84	17.96		17.9403	35.1	0	1.4	8.1	8.5	8.7	41520.6	USB4000-VIS-RF52054	SHMSL	U1426A-3H-4A, 34.0cm		4
346	U1426	A	3	H	4	A	35	16.85	17.97		17.9503	34.2	-0.3	2	7.7	8.1	8.1	41520.6	USB4000-VIS-RF52054	SHMSL	U1426A-3H-4A, 35.0cm		4
346	U1426	A	3	H	4	A	36	16.86	17.98		17.9603	35	-0.3	1.6	8	8.5	8.6	41520.6	USB4000-VIS-RF52054	SHMSL	U1426A-3H-4A, 36.0cm		4
346	U1426	A	3	H	4	A	37	16.87	17.99		17.9703	34.1	-0.3	1.8	7.6	8	8.1	41520.6	USB4000-VIS-RF52054	SHMSL	U1426A-3H-4A, 37.0cm		4
346	U1426	A	3	H	4	A	38	16.88	18		17.9803	34.1	-0.4	2	7.6	8	8.1	41520.6	USB4000-VIS-RF52054	SHMSL	U1426A-3H-4A, 38.0cm		4
346	U1426	A	3	H	4	A	39	16.89	18.01		17.9903	32.9	-0.3	2	7.1	7.5	7.5	41520.6	USB4000-VIS-RF52054	SHMSL	U1426A-3H-4A, 39.0cm		4
346	U1426	A	3	H	4	A	40	16.9	18.02		18.0003	31.9	0	1.9	6.7	7	7	41520.6	USB4000-VIS-RF52054	SHMSL	U1426A-3H-4A, 40.0cm		4
346	U1426	A	3	H	4	A	41	16.91	18.03		18.0103	35.1	0.7	0	8.2	8.5	9.1	41520.6	USB4000-VIS-RF52054	SHMSL	U1426A-3H-4A, 41.0cm		4
346	U1426	A	3	H	4	A	42	16.92	18.04		18.0203	29.9	1	-0.6	6	6.2	6.8	41520.6	USB4000-VIS-RF52054	SHMSL	U1426A-3H-4A, 42.0cm		4
346	U1426	A	3	H	4	A	43	16.93	18.05		18.0303	26.2	0.9	-1	4.6	4.8	5.4	41520.6	USB4000-VIS-RF52054	SHMSL	U1426A-3H-4A, 43.0cm		4
346	U1426	A	3	H	4	A	44	16.94	18.06		18.0403	29.2	0.5	1.5	5.6	5.9	6	41520.6	USB4000-VIS-RF52054	SHMSL	U1426A-3H-4A, 44.0cm		4
346	U1426	A	3	H	4	A	45	16.95	18.07		18.0503	28.8	0.4	2.3	5.5	5.8	5.7	41520.6	USB4000-VIS-RF52054	SHMSL	U1426A-3H-4A, 45.0cm		4
346	U1426	A	3	H	4	A	46	16.96	18.08		18.0603	29.5	0.3	2.4	5.7	6	5.9	41520.6	USB4000-VIS-RF52054	SHMSL	U1426A-3H-4A, 46.0cm		4
346	U1426	A	3	H	4	A	47	16.97	18.09		18.0703	31.9	0.1	2.9	6.7	7.1	6.8	41520.6	USB4000-VIS-RF52054	SHMSL	U1426A-3H-4A, 47.0cm		4
346	U1426	A	3	H	4	A	48	16.98	18.1		18.0803	35.6	-0.7	0.7	8.3	8.8	9.2	41520.6	USB4000-VIS-RF52054	SHMSL	U1426A-3H-4A, 48.0cm		4
346	U1426	A	3	H	4	A	49	16.99	18.11		18.0903	36	-0.7	0.5	8.5	9	9.5	41520.6	USB4000-VIS-RF52054	SHMSL	U1426A-3H-4A, 49.0cm		4
346	U1426	A	3	H	4	A	50	17	18.12		18.1003	36.4	-0.7	0.1	8.7	9.2	9.9	41520.6	USB4000-VIS-RF52054	SHMSL	U1426A-3H-4A, 50.0cm		4
346	U1426	A	3	H	4	A	51	17.01	18.13		18.1103	36.3	-0.7	0.2	8.6	9.2	9.8	41520.6	USB4000-VIS-RF52054	SHMSL	U1426A-3H-4A, 51.0cm		4
346	U1426	A	3	H	4	A	52	17.02	18.14		18.1203	35.9	-0.5	0.5	8.4	8.9	9.4	41520.6	USB4000-VIS-RF52054	SHMSL	U1426A-3H-4A, 52.0cm		4
346	U1426	A	3	H	4	A	53	17.03	18.15		18.1303	36.1	-0.6	-0.1	8.5	9.1	9.8	41520.6	USB4000-VIS-RF52054	SHMSL	U1426A-3H-4A, 53.0cm		4
346	U1426	A	3	H	4	A	54	17.04	18.16		18.1403	34.8	-0.6	0.3	7.9	8.4	8.9	41520.6	USB4000-VIS-RF52054	SHMSL	U1426A-3H-4A, 54.0cm		4
346	U1426	A	3	H	4	A	55	17.05	18.17		18.1503	34.7	-0.6	0.6	7.9	8.4	8.8	41520.6	USB4000-VIS-RF52054	SHMSL	U1426A-3H-4A, 55.0cm		4
346	U1426	A	3	H	4	A	56	17.06	18.18		18.1603	34.9	-0.8	0.2	7.9	8.4	9	41520.6	USB4000-VIS-RF52054	SHMSL	U1426A-3H-4A, 56.0cm		4
346	U1426	A	3	H	4	A	57	17.07	18.19		18.1703	36.2	-0.7	-0.1	8.6	9.1	9.8	41520.6	USB4000-VIS-RF52054	SHMSL	U1426A-3H-4A, 57.0cm		4
346	U1426	A	3	H	4	A	58	17.08	18.2		18.1803	37.3	-0.5	-0.9	9.1	9.7	10.7	41520.6	USB4000-VIS-RF52054	SHMSL	U1426A-3H-4A, 58.0cm		4
346	U1426	A	3	H	4	A	59	17.09	18.21		18.1903	36.7	-0.8	-0.3	8.8	9.4	10.2	41520.6	USB4000-VIS-RF52054	SHMSL	U1426A-3H-4A, 59.0cm		4
346	U1426	A	3	H	4	A	60	17.1	18.22		18.2003	36.5	-0.7	-0.3	8.7	9.3	10	41520.6	USB4000-VIS-RF52054	SHMSL	U1426A-3H-4A, 60.0cm		4
346	U1426	A	3	H	4	A	61	17.11	18.23		18.2103	37	-0.8	-0.1	8.9	9.5	10.3	41520.6	USB4000-VIS-RF52054	SHMSL	U1426A-3H-4A, 61.0cm		4
346	U1426	A	3	H	4	A	62	17.12	18.24		18.2203	36.8	-0.6	-0.4	8.9	9.4	10.3	41520.6	USB4000-VIS-RF52054	SHMSL	U1426A-3H-4A, 62.0cm		4
[truncated: 6,819 more rows]

## Sheet: GRA
Exp	Site	Hole	Core	Type	Sect	A/W	Offset (cm)	Depth CSF-A (m)	Depth 346-U1426 (m)	CCSF-D_Patched_rev20150519 (m)	Bulk density (GRA) (g/cmﾂｳ)	Error (g/cmﾂｳ)	Error (%)	Removed GRA	Timestamp (UTC)	Instrument	Instrument group	Proceedings label	Comments	Splice Interval	Patch
[truncated: 4,854 more rows]

[truncated: 1 more sheets: NGR]
